# Supplementary material for: Synthesis of medium-sized (6–7–6) ring compounds by iron-catalyzed dehydrogenative C–H activation/annulation
Source: Royal Society of Chemistry journal article supplement (doi:10.1039/c8ob01496e), 2018-01-01

## Supporting information

### **Synthesis of medium-sized (6-7-6) ring compounds by iron-catalyzed C-H activation/annulation**

Niranjana Panda,<sup>\*a</sup> Irshad Mattan,<sup>a</sup> Subhadra Ojha<sup>a</sup> and Chadra Sekhar Purohit<sup>b</sup>

<sup>a</sup> Department of Chemistry, National Institute of Technology Rourkela  
Odisha, India-769008

ORCID: <https://orcid.org/0000-0002-7431-8826>

Email: [npanda@nitrkl.ac.in](mailto:npanda@nitrkl.ac.in), [niranjana.panda@gmail.com](mailto:niranjana.panda@gmail.com)

<sup>b</sup> *School of Chemical Science, National Institute of Science Education Research,  
Bhubaneswar, Odisha-751005, India*

## Synthesis of 2-iododiaryl ethers (1o-t)

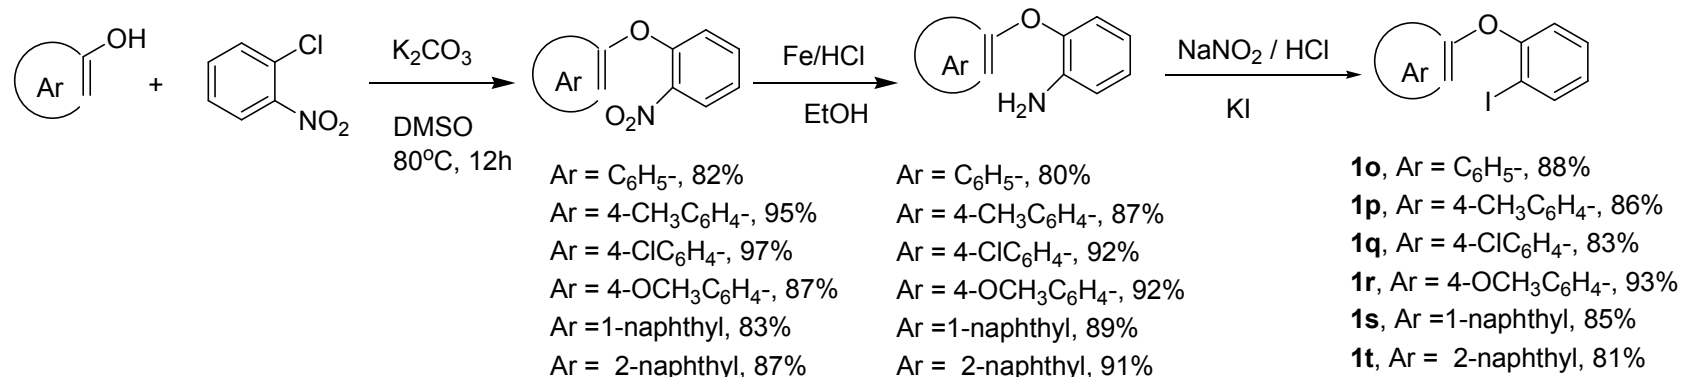

## General procedure for the synthesis of 2-nitrodiaryl ether

A mixture of phenol (6.3 mmol), 2-chloro nitrobenzene 7.6 mmol (6.3 mmol) and K<sub>2</sub>CO<sub>3</sub> (12.6 mmol) in DMSO (6 ml) was stirred at 80°C for 12h. After the completion of the reaction (as monitored by TLC) the reaction mixture was poured into water (20 mL) and extracted with ethyl acetate (3 x 20 mL). The combined organic layer was washed with water (50 mL), dried over anhydrous Na<sub>2</sub>SO<sub>4</sub>, and concentrated under reduced pressure. The residue was purified by column chromatography using ethyl acetate and petroleum ether as eluent to afford the desired 2-nitrodiaryl ether.

## General procedure for the synthesis of 2-aminodiaryl ether

To a solution of 2-nitrodiaryl ether (4.0 mmol) in absolute ethanol (7 mL), iron powder (10 eq.) was added at room temperature. Then, temperature of the reaction mixture was raised to 80°C and 1.0 mL of concentrated HCl was added dropwise over a period of 10 min. After 2h the reaction mixture was cooled to room temperature and then made alkaline using aq. NaOH solution. Then, solid mass was filtered and the amine was extracted from the filtrate using ethyl acetate (5 x 20 mL). Solvent was removed under reduced pressure and the prepared 2-aminodiaryl ether was subjected for the next step without further purification.

## General procedure for the synthesis of 2-iododiaryl ether

To a solution of 2-aminodiaryl ether (4 mmol) in 4.5 mL water, 1 mL of concentrated hydrochloric acid was added at 0°C and stirred for 10 min. To the reaction mixture an aqueous solution of sodium nitrite (4.8 mmol) in 1 mL water was added at 0°C and stirred for 30 min. Then an aqueous solution of potassium iodide (6 mmol) in 1 mL water was added to the reaction mixture at that temperature. The reaction mixture was allowed to come to room temperature and stirred for 10 min and then heated in a pre heated oil bath at 80°C for 30 min. Then, the reaction mixture was cooled to room temperature and 5 mL of saturated solution of Na<sub>2</sub>S<sub>2</sub>O<sub>3</sub> was added. The iodo-compound so formed was extracted with ethyl acetate (3 x 20 mL). The organic layer was washed with brine, the solvent removed under reduced pressure and the crude product purified by column chromatography to obtain the desired 2-iododiaryl ether.

# Copies of $^1\text{H}$ and $^{13}\text{C}$ NMR spectra

## $^1\text{H}$ NMR of 1-(4-phenoxy-3-(phenylethynyl)phenyl)ethanone (2a)

5.6.2018

$^1\text{H}$  of NP-IM-SOn-p-COMe 5.6.2018

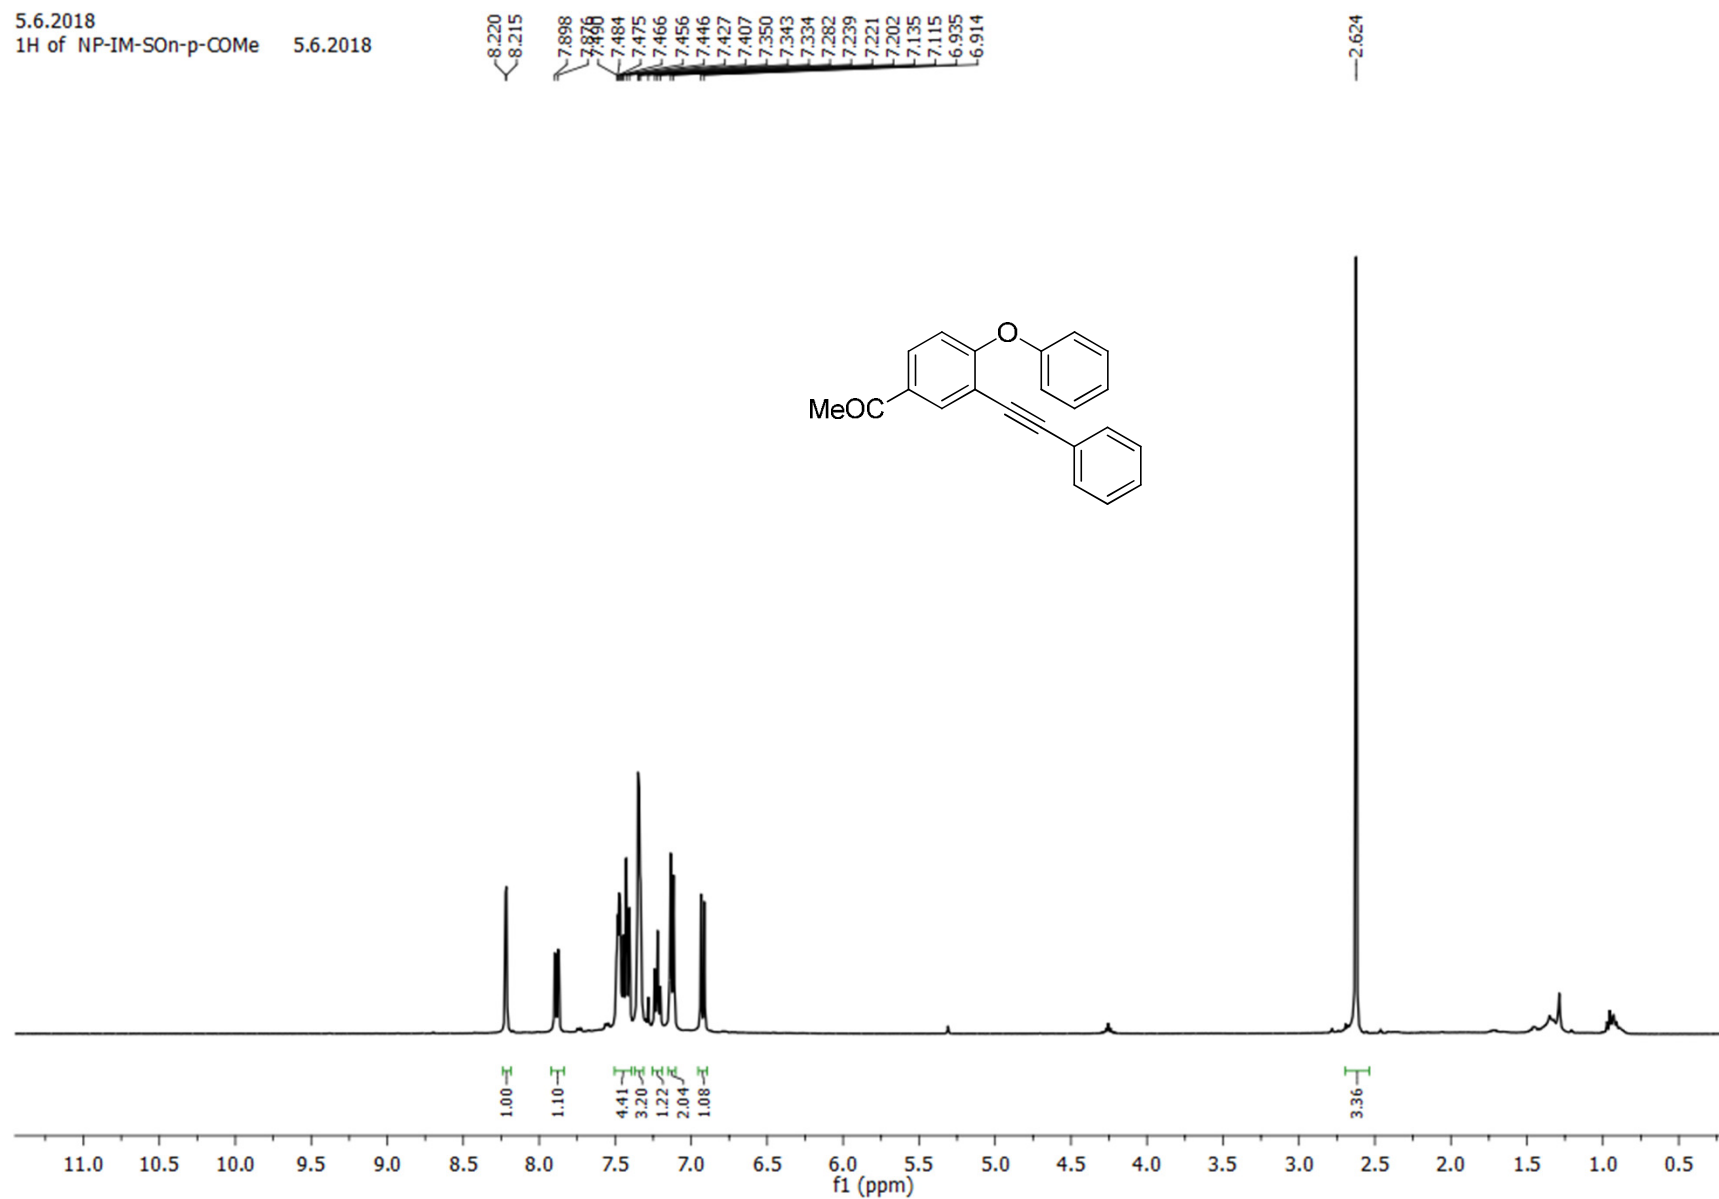

**$^{13}\text{C}$  NMR of 1-(4-phenoxy-3-(phenylethynyl)phenyl)ethanone (2a)**

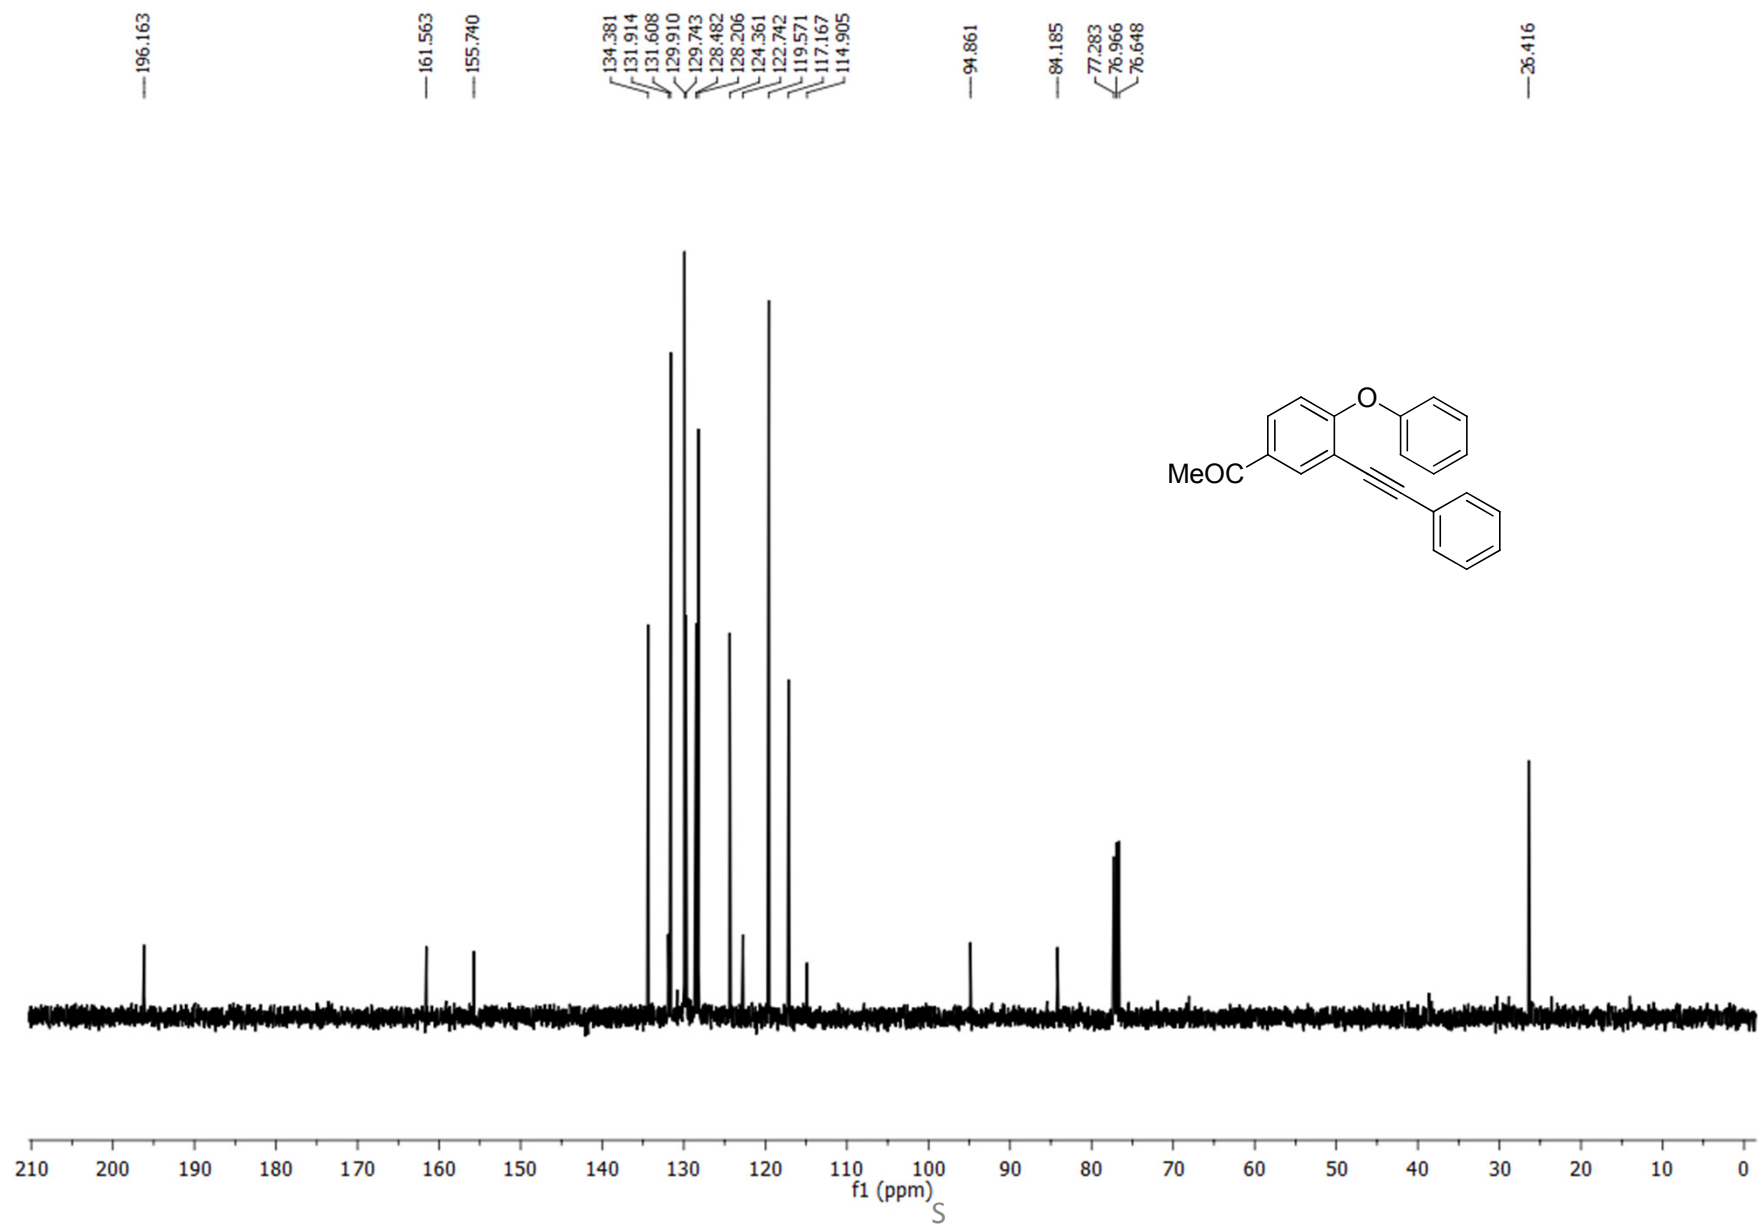



**<sup>1</sup>H NMR of 4-nitro-1-phenoxy-2-(phenylethynyl)benzene (2b)**

27.11.2015  
NP-IM-481 1H

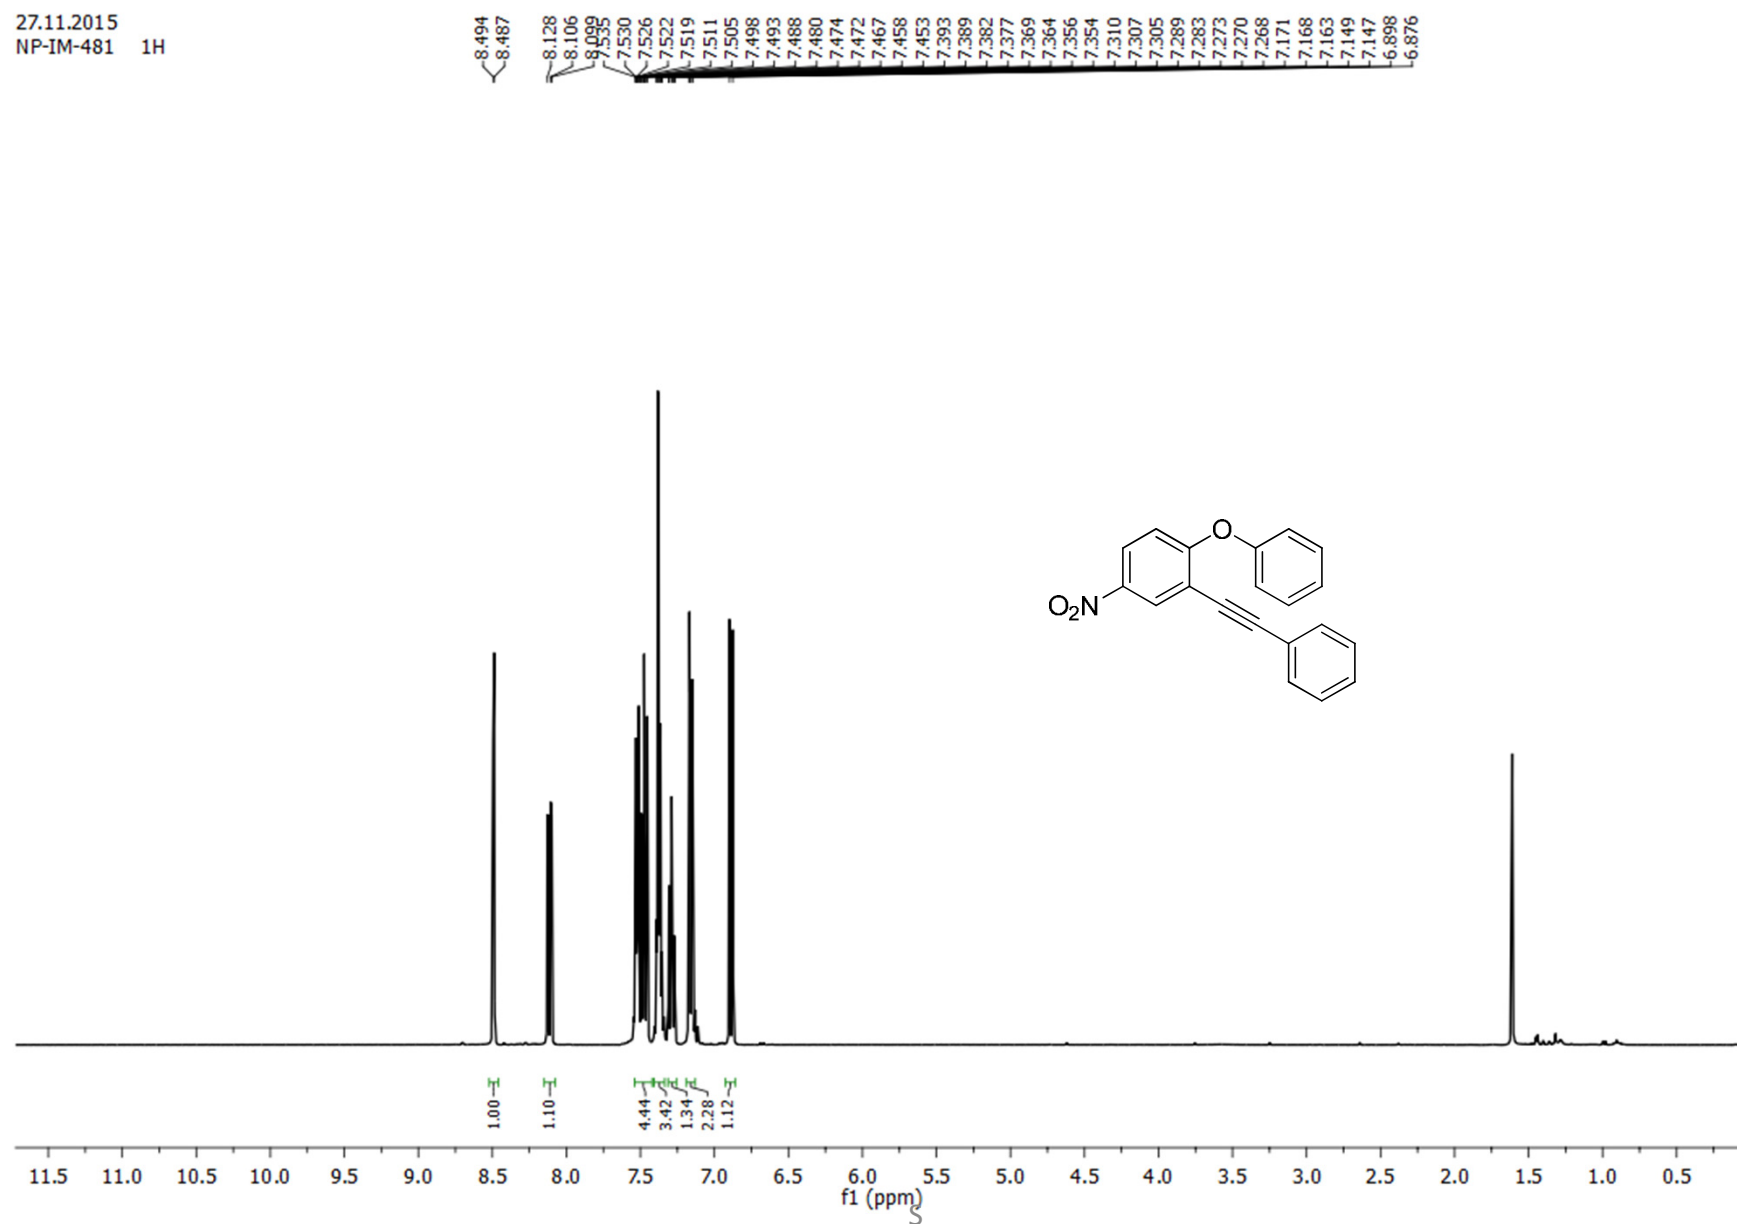

**<sup>13</sup>C NMR of 4-nitro-1-phenoxy-2-(phenylethynyl)benzene (2b)**

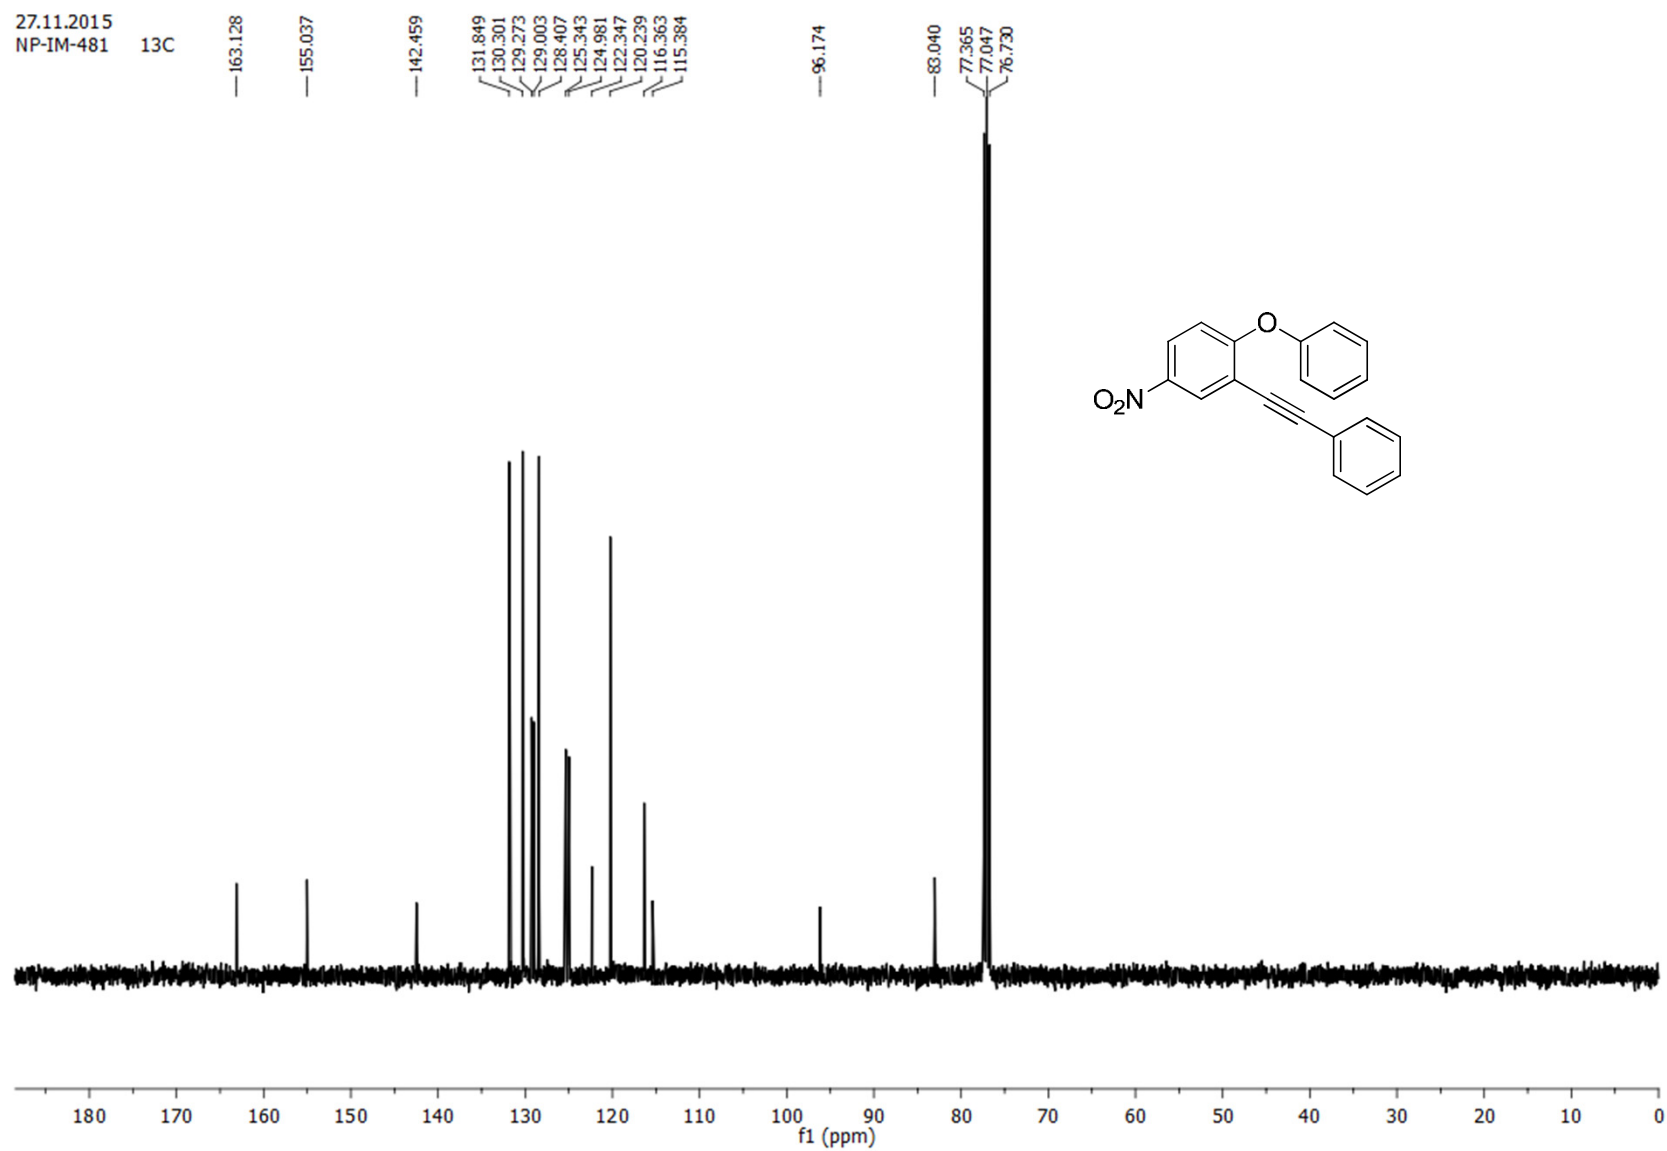

**<sup>1</sup>H NMR of methyl 4-phenoxy-3-(phenylethynyl)benzoate (2c)**

7.6.2018

<sup>1</sup>H of NP-IM-SON-p-CO2-me 7.6.2018

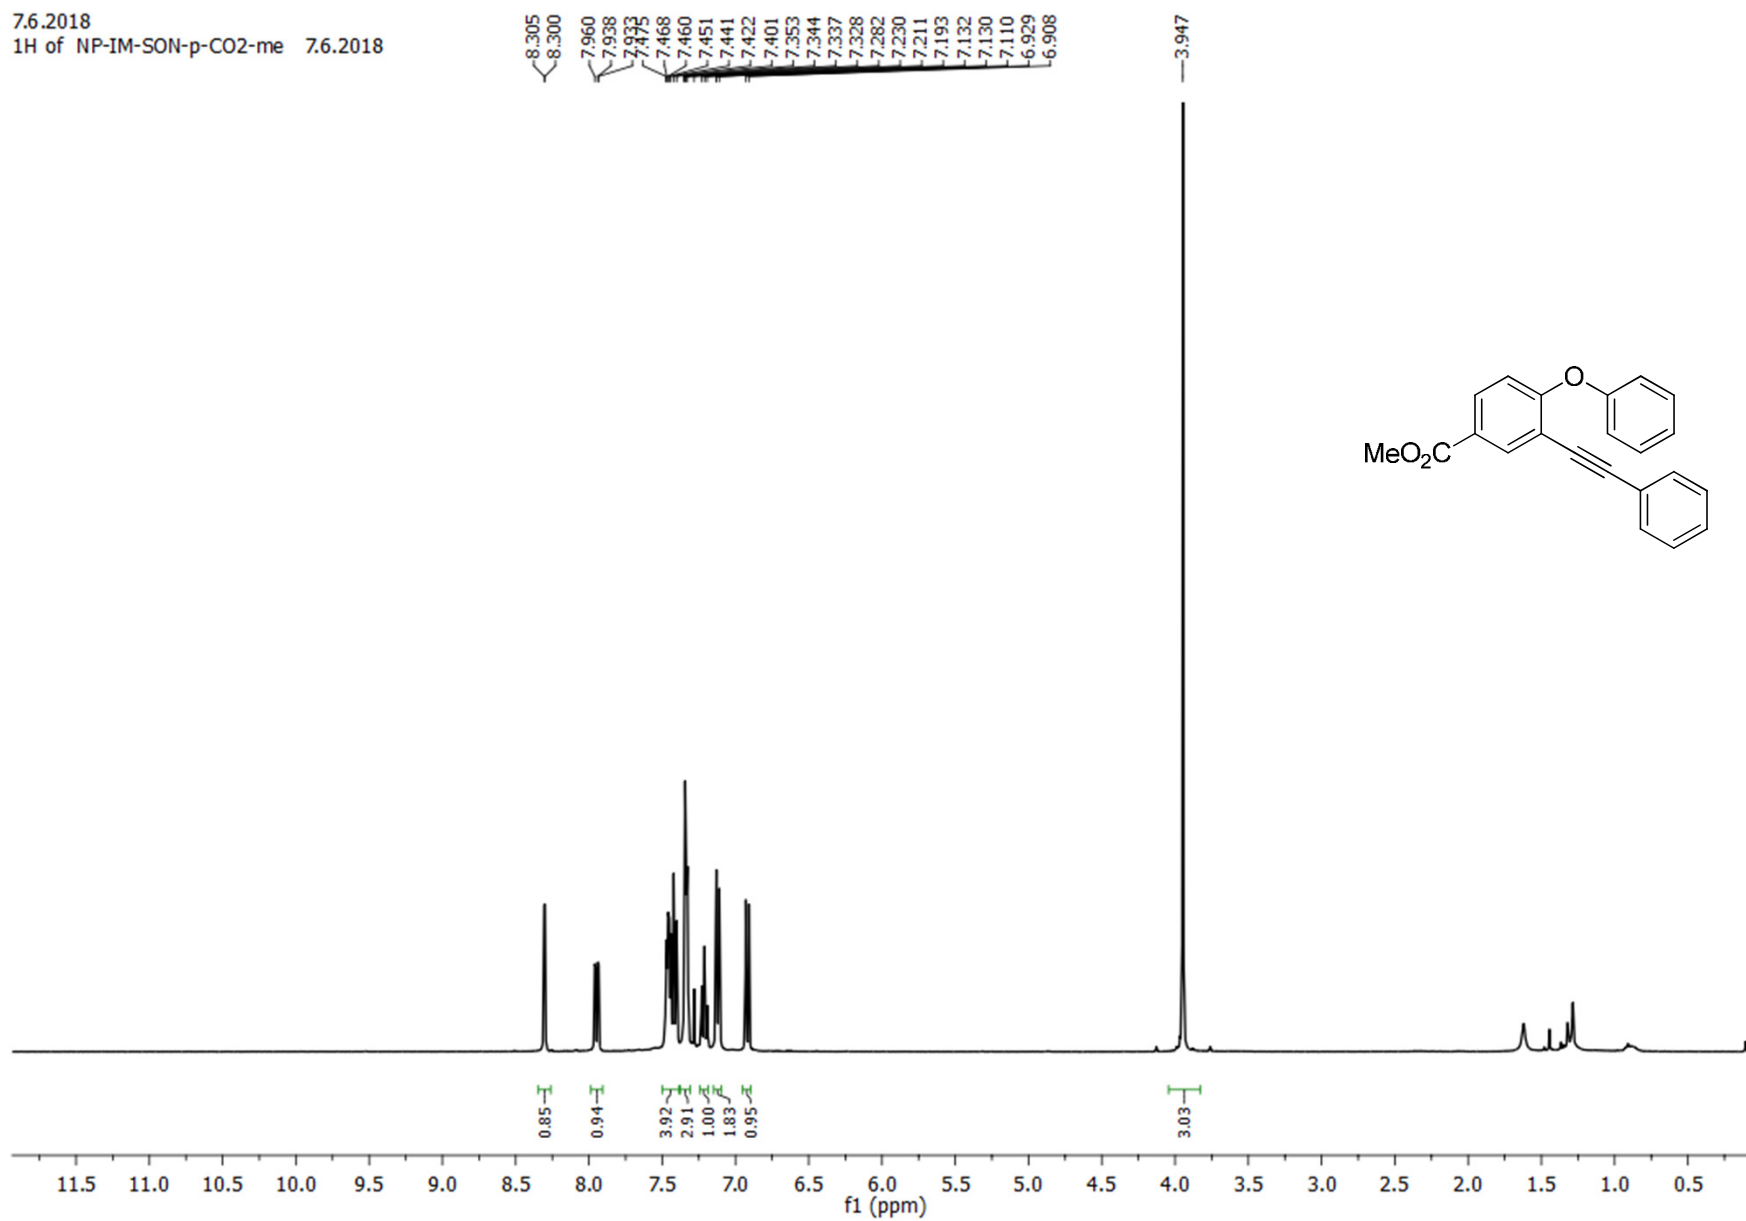

**$^{13}\text{C}$  NMR of methyl 4-phenoxy-3-(phenylethynyl)benzoate (2c)**

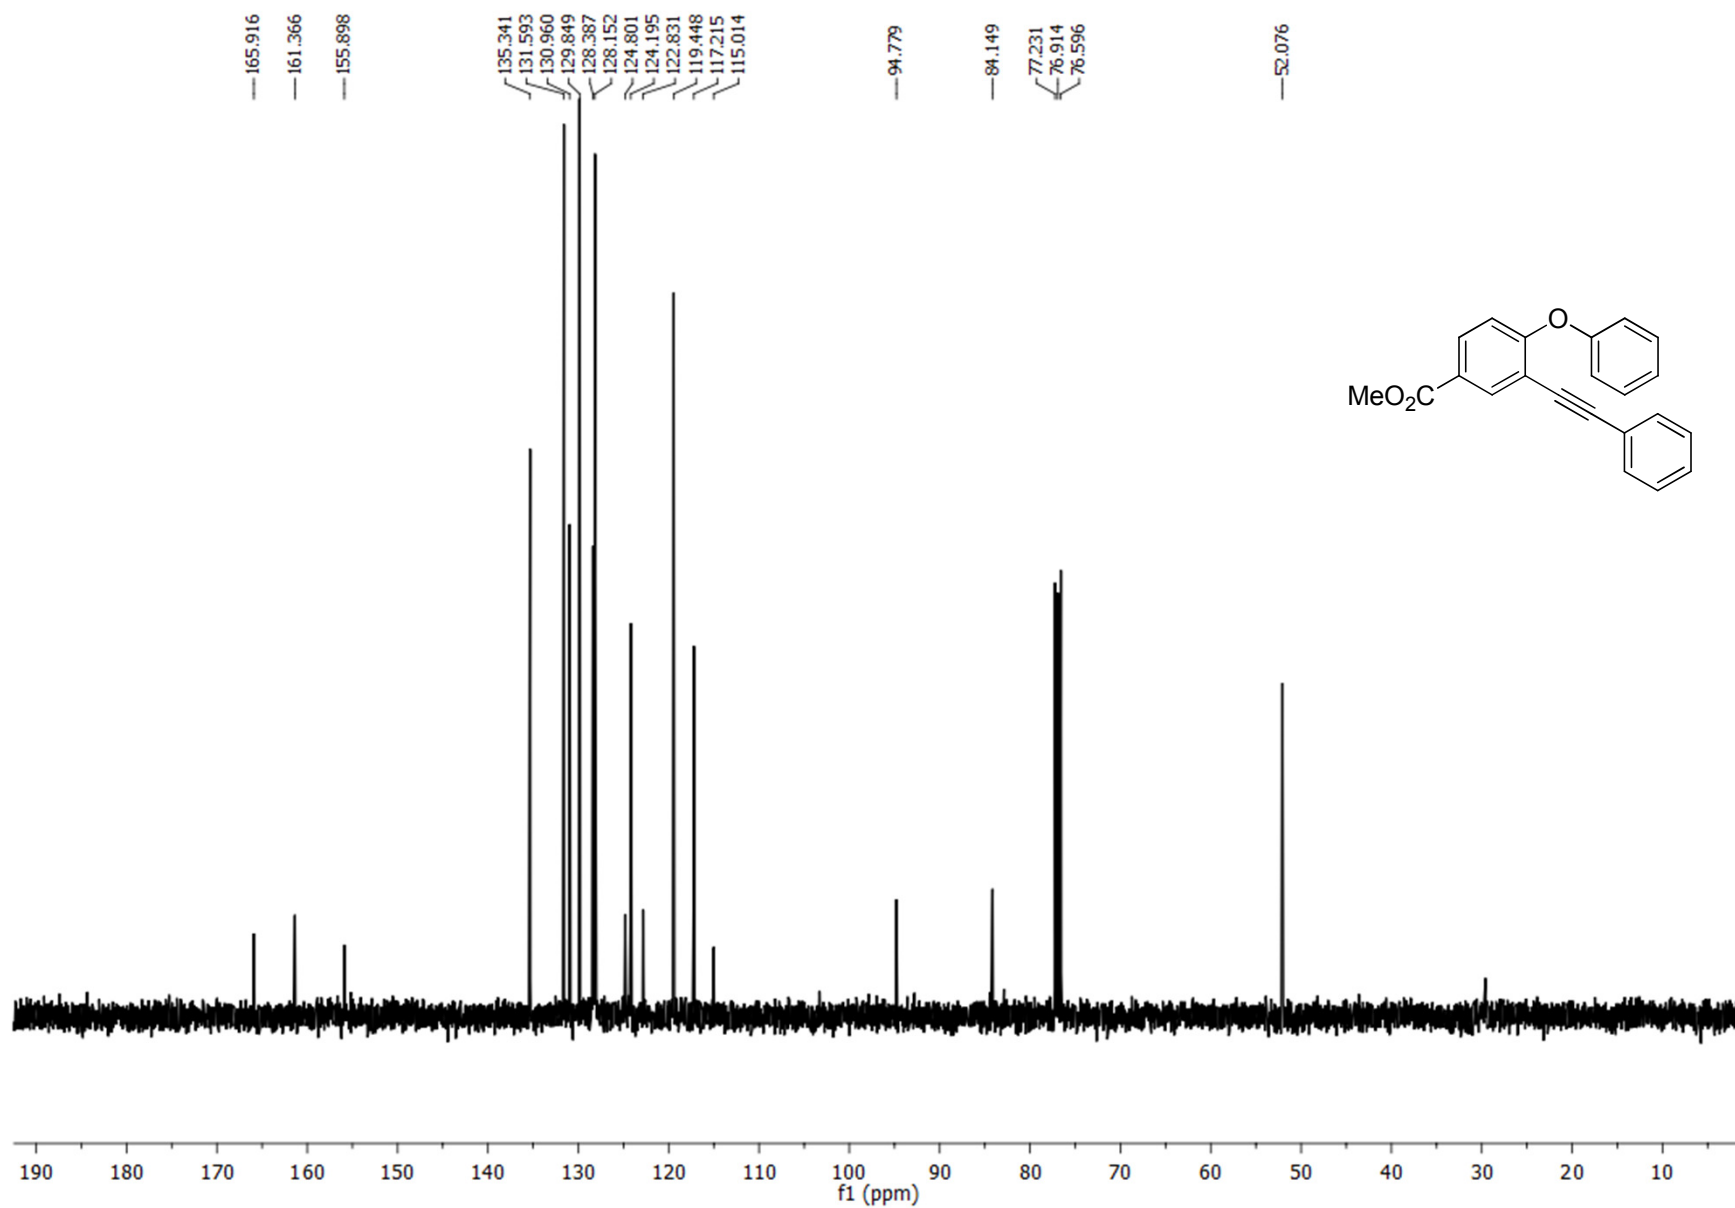

**<sup>1</sup>H NMR of ethyl 4-phenoxy-3-(phenylethynyl)benzoate (2d)**

26.11.2015  
NP-IM-836 1H

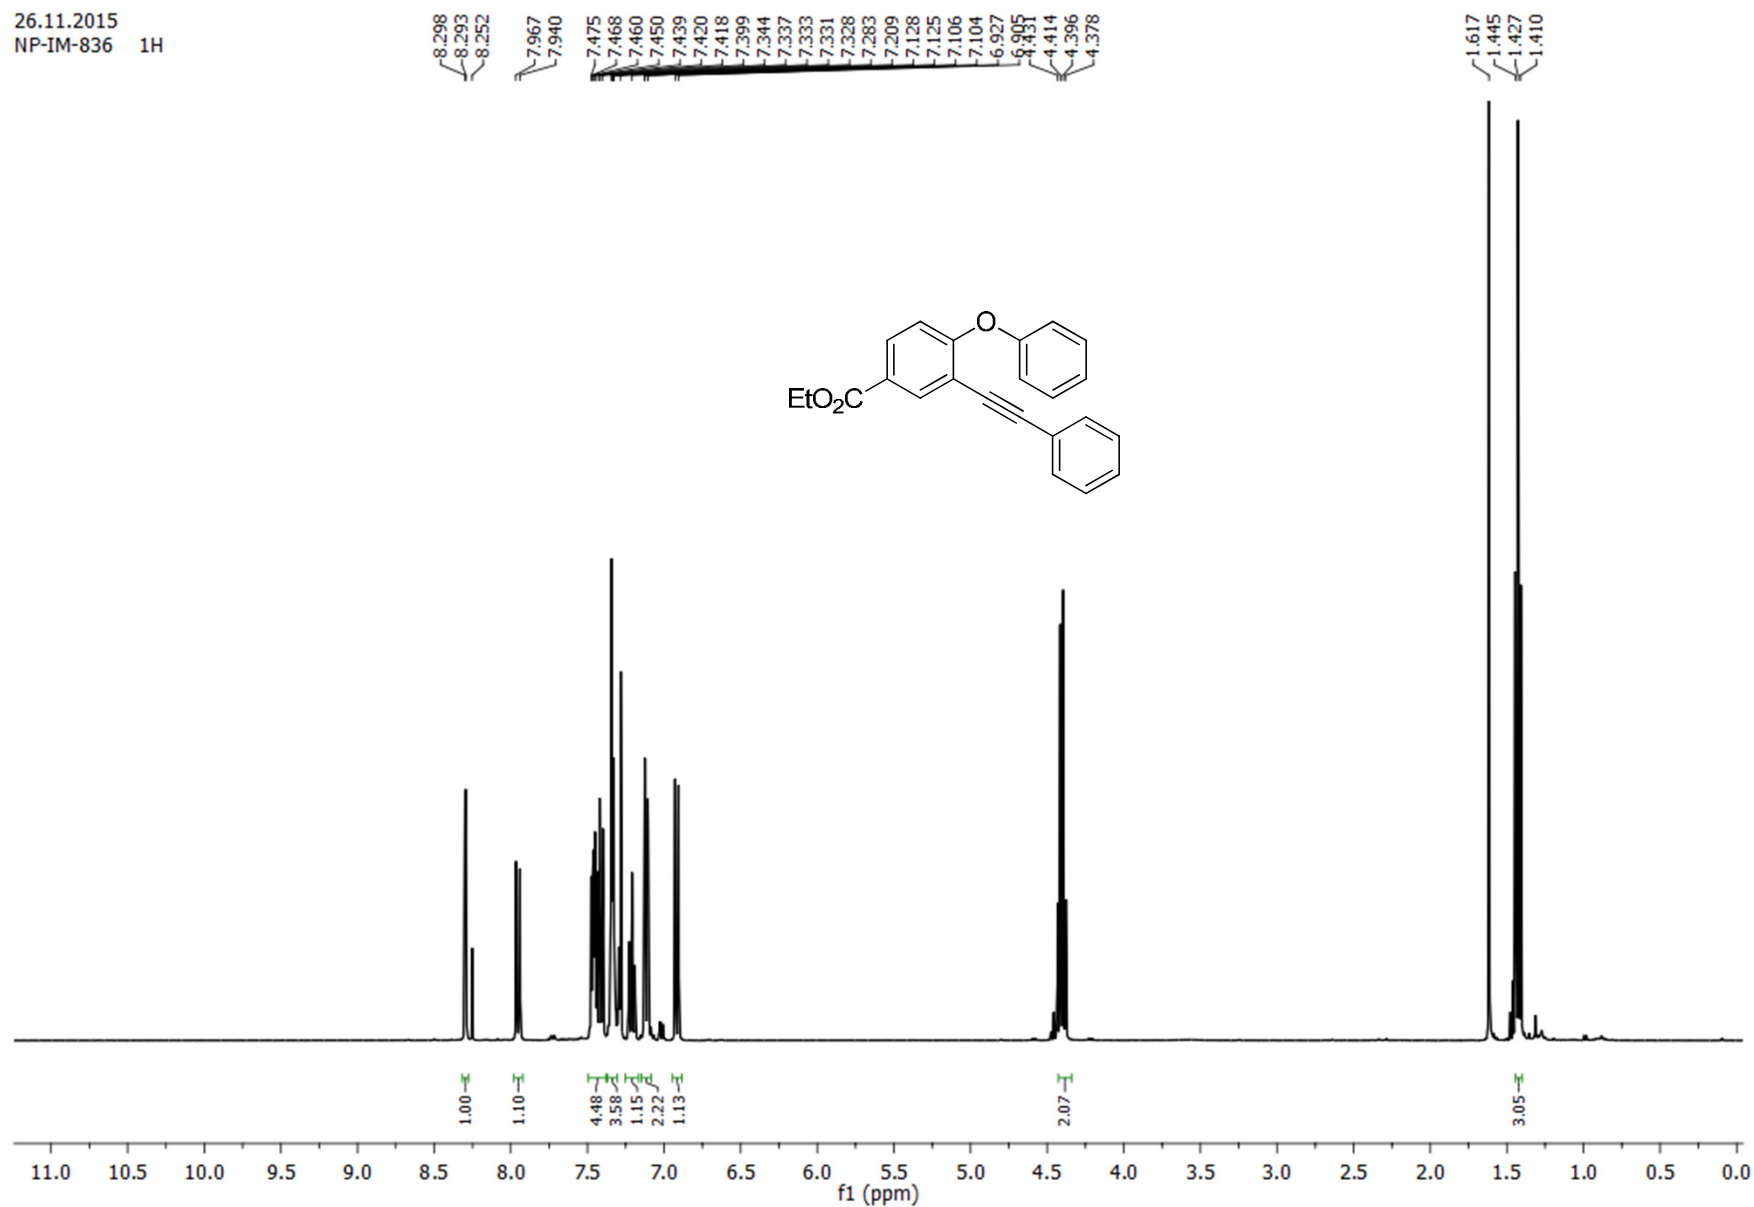

**$^{13}\text{C}$  NMR of ethyl 4-phenoxy-3-(phenylethynyl)benzoate (2d)**

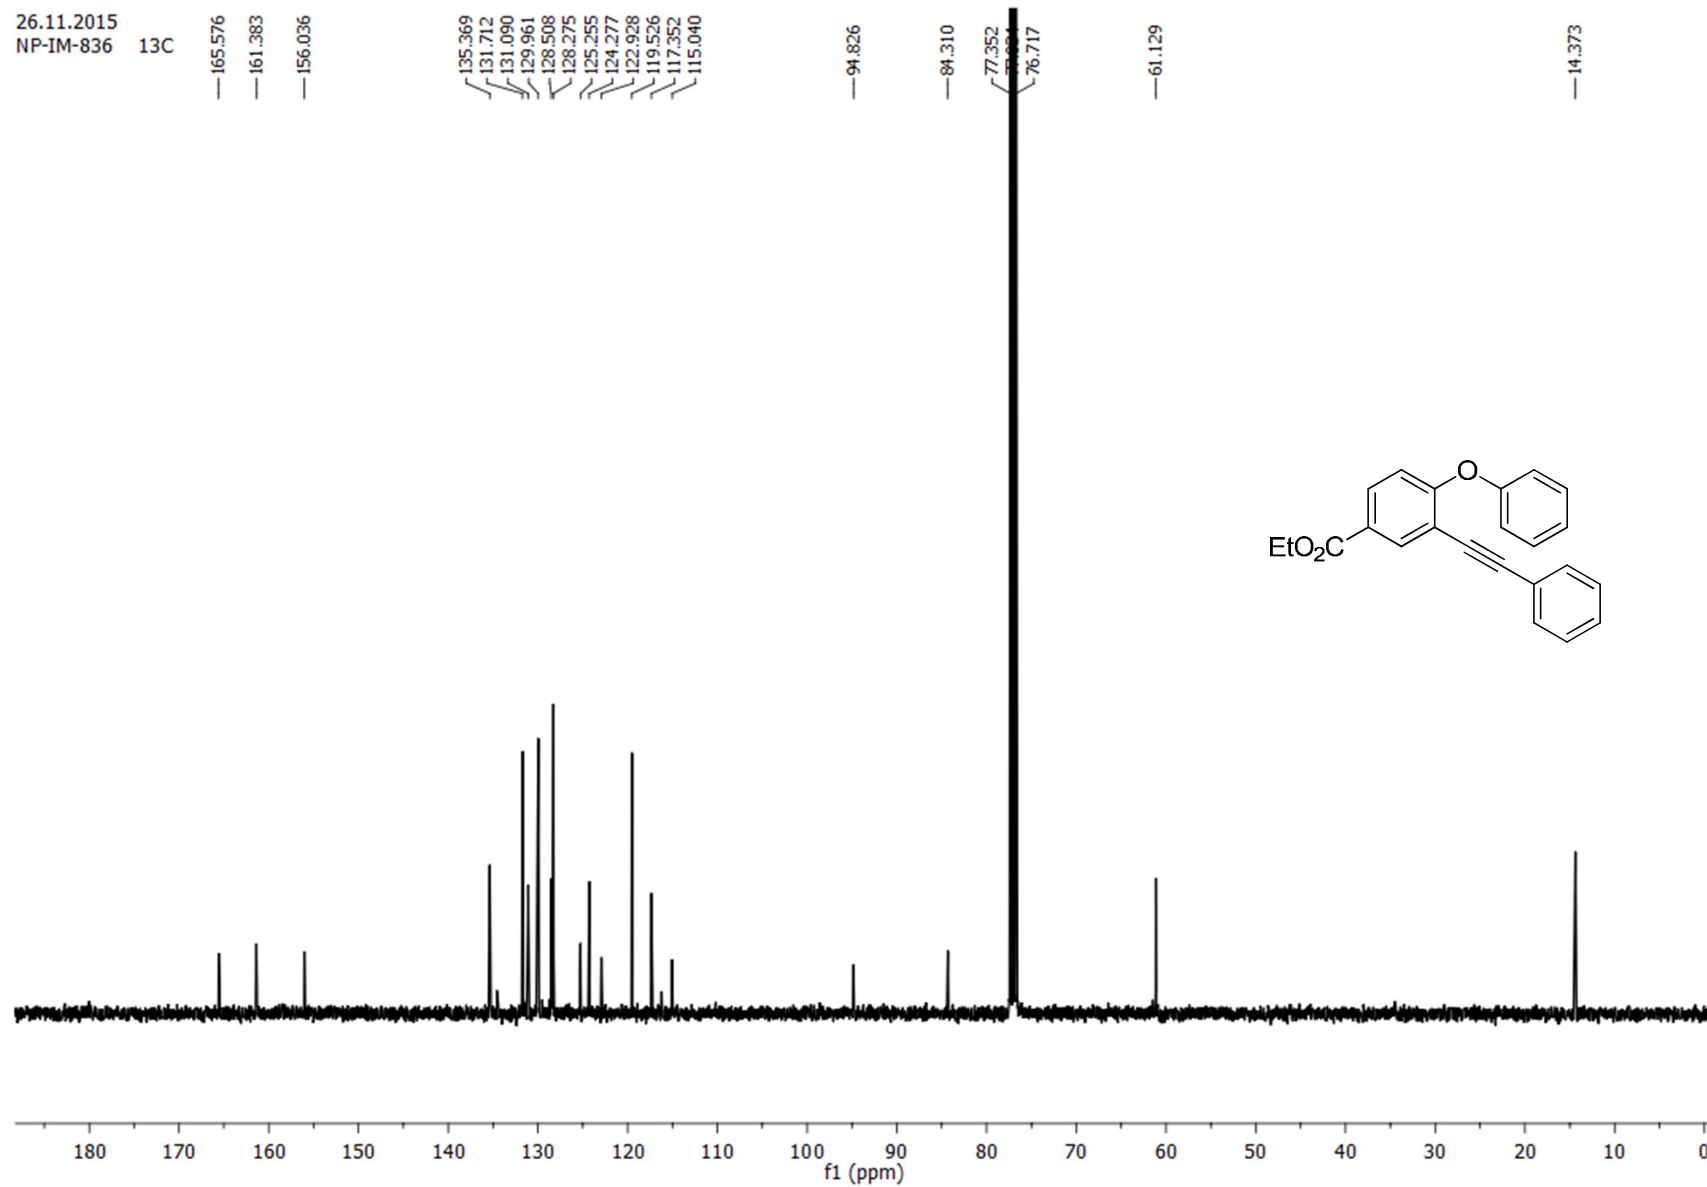

# <sup>1</sup>H NMR of isopropyl 4-phenoxy-3-(phenylethynyl)benzoate (2e)

7.6.2018

1H of NP-IM-SON-p-CO2-iPr

7.6.2018

8.286  
8.281  
7.971  
7.966  
7.949  
7.467  
7.458  
7.450  
7.433  
7.413  
7.394  
7.343  
7.336  
7.327  
7.283  
7.202  
7.120  
7.101  
6.941  
6.928  
5.318  
5.300  
5.285  
5.269  
5.254

1.414  
1.398

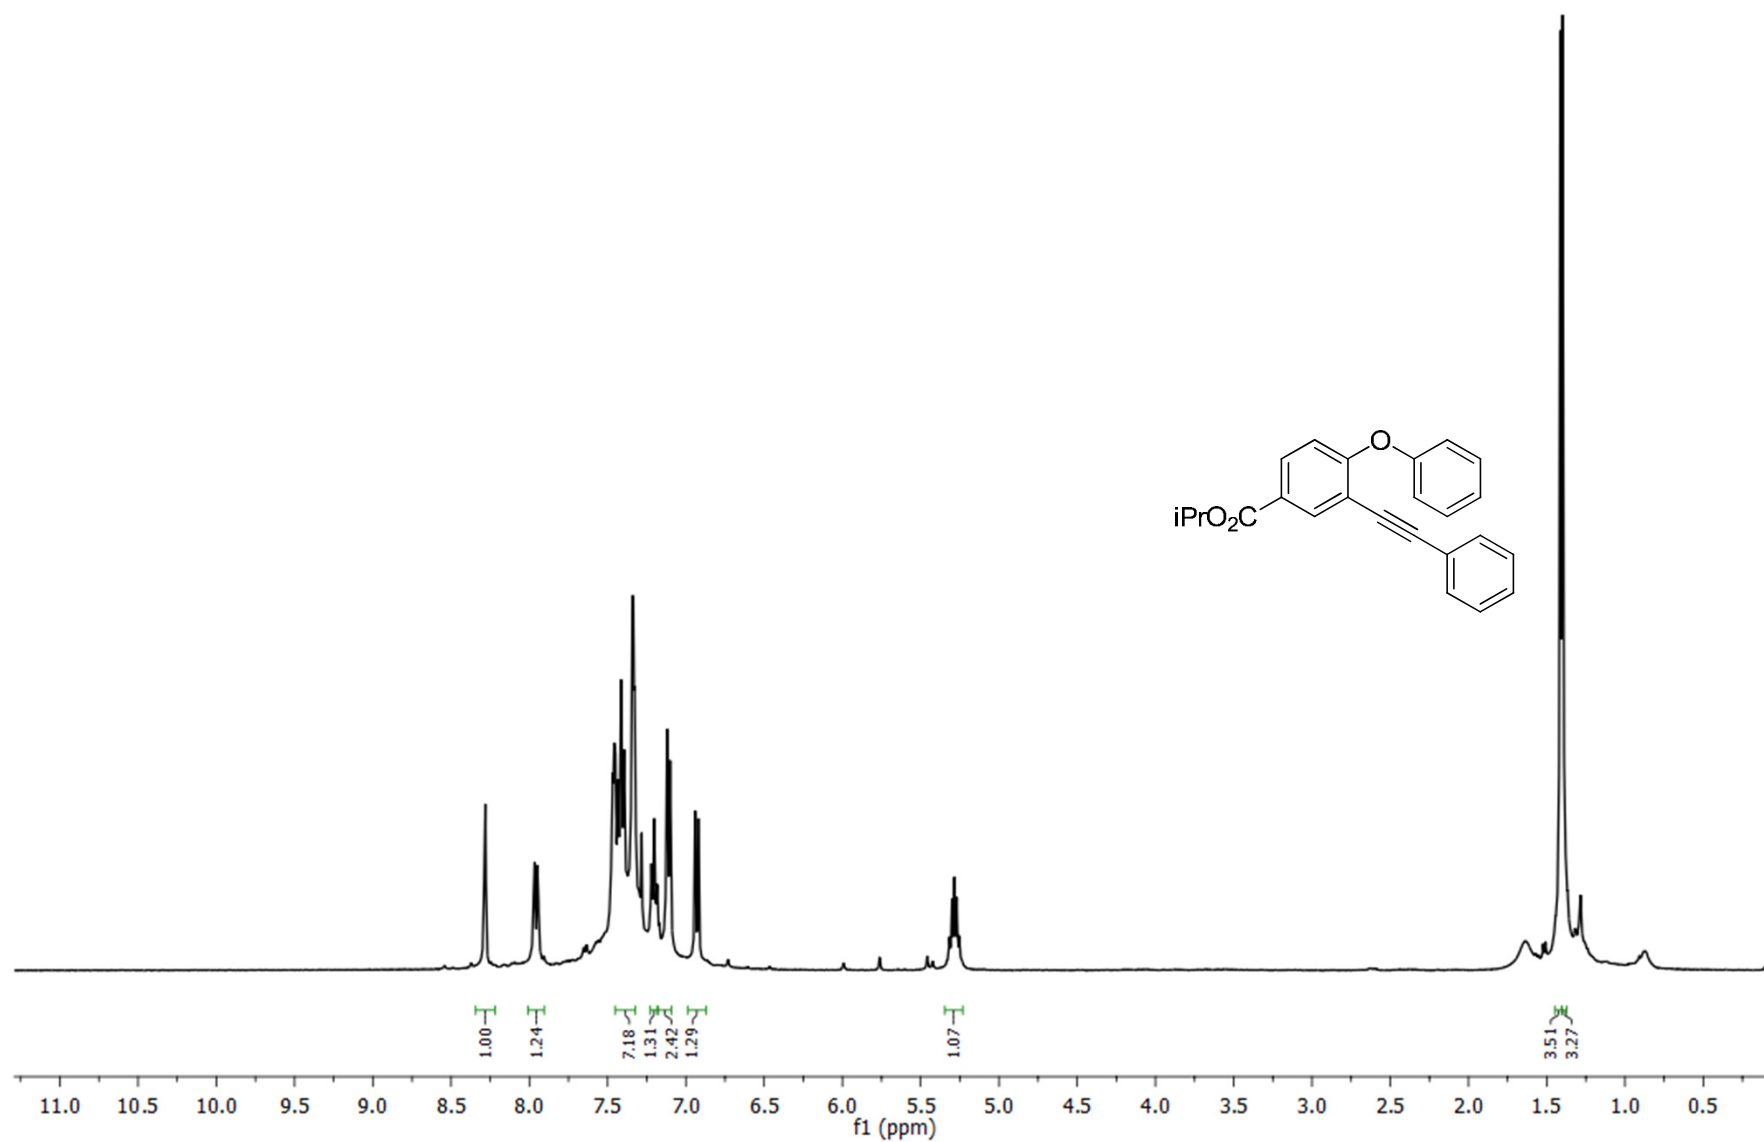

S

**<sup>13</sup>C NMR of isopropyl 4-phenoxy-3-(phenylethynyl)benzoate(2e)**

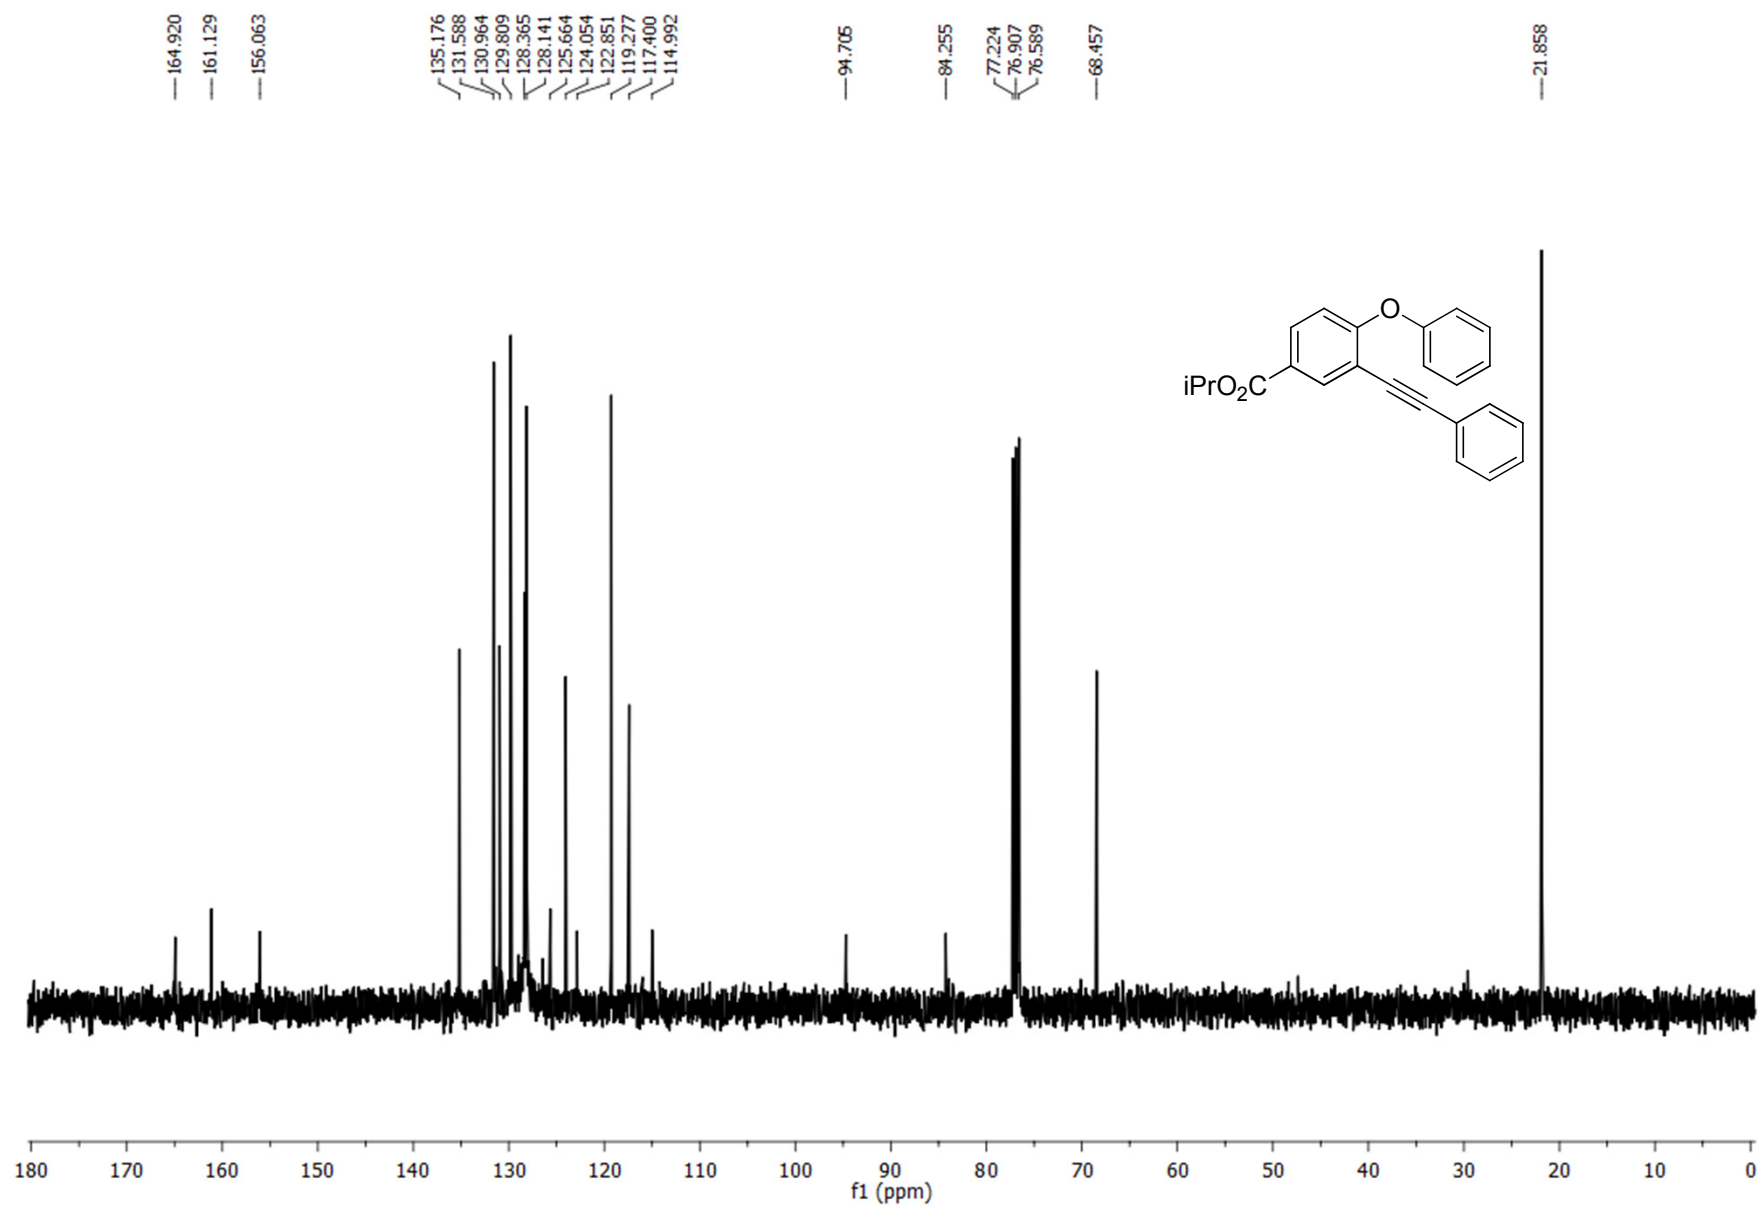

S



**<sup>1</sup>H NMR of 4-phenoxy-3-(phenylethynyl)benzonitrile (2f)**

10.11.2015  
NP-IM-823(2) 1H

7.888  
7.883  
7.533  
7.528  
7.512  
7.506  
7.499  
7.496  
7.492  
7.488  
7.480  
7.472  
7.467  
7.453  
7.451  
7.437  
7.432  
7.426  
7.381  
7.377  
7.374  
7.370  
7.365  
7.357  
7.352  
7.344  
7.341  
7.282  
7.280  
7.277  
7.261  
7.245  
7.243  
7.240  
7.142  
7.139  
7.134  
7.123  
7.120  
7.118  
7.112  
6.907  
6.886

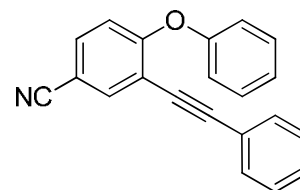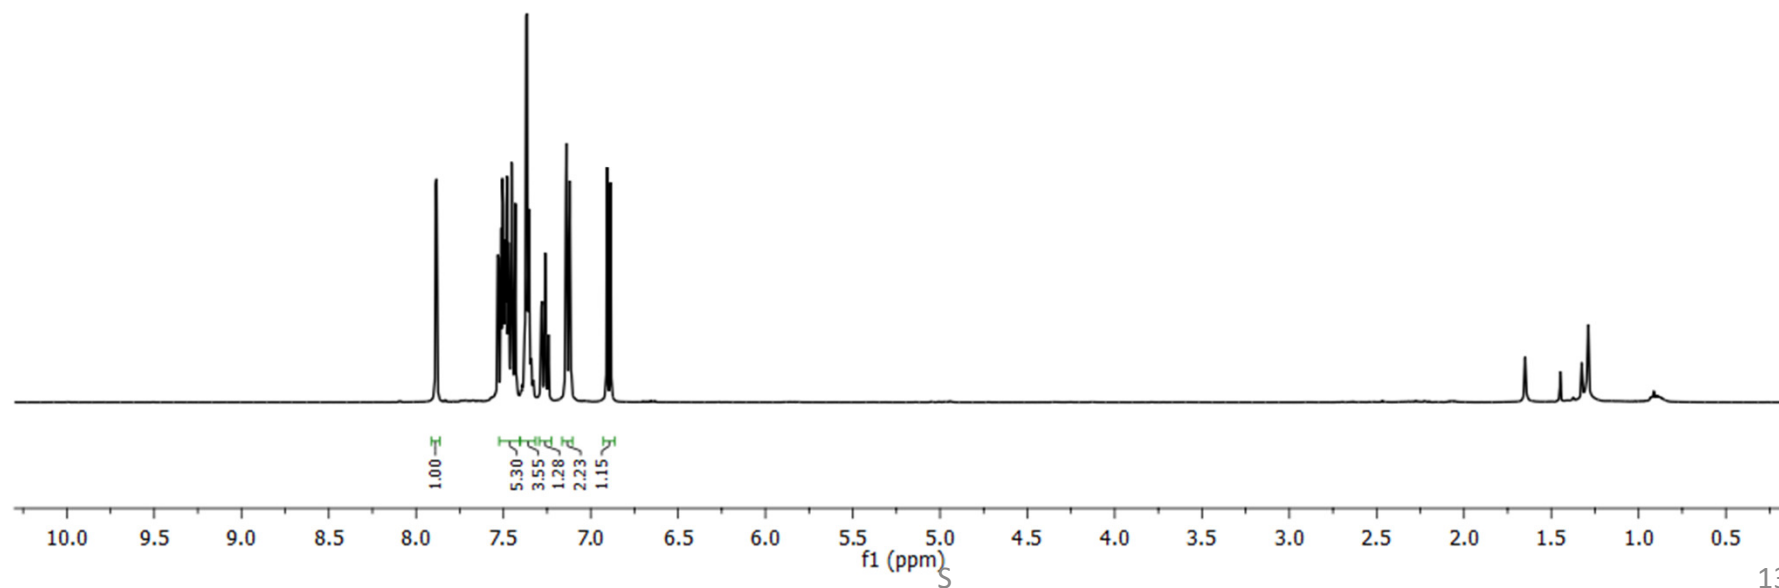

**<sup>13</sup>C NMR of 4-phenoxy-3-(phenylethynyl)benzonitrile (2f)**

10.11.2015  
NP-IM-823(2) 13C

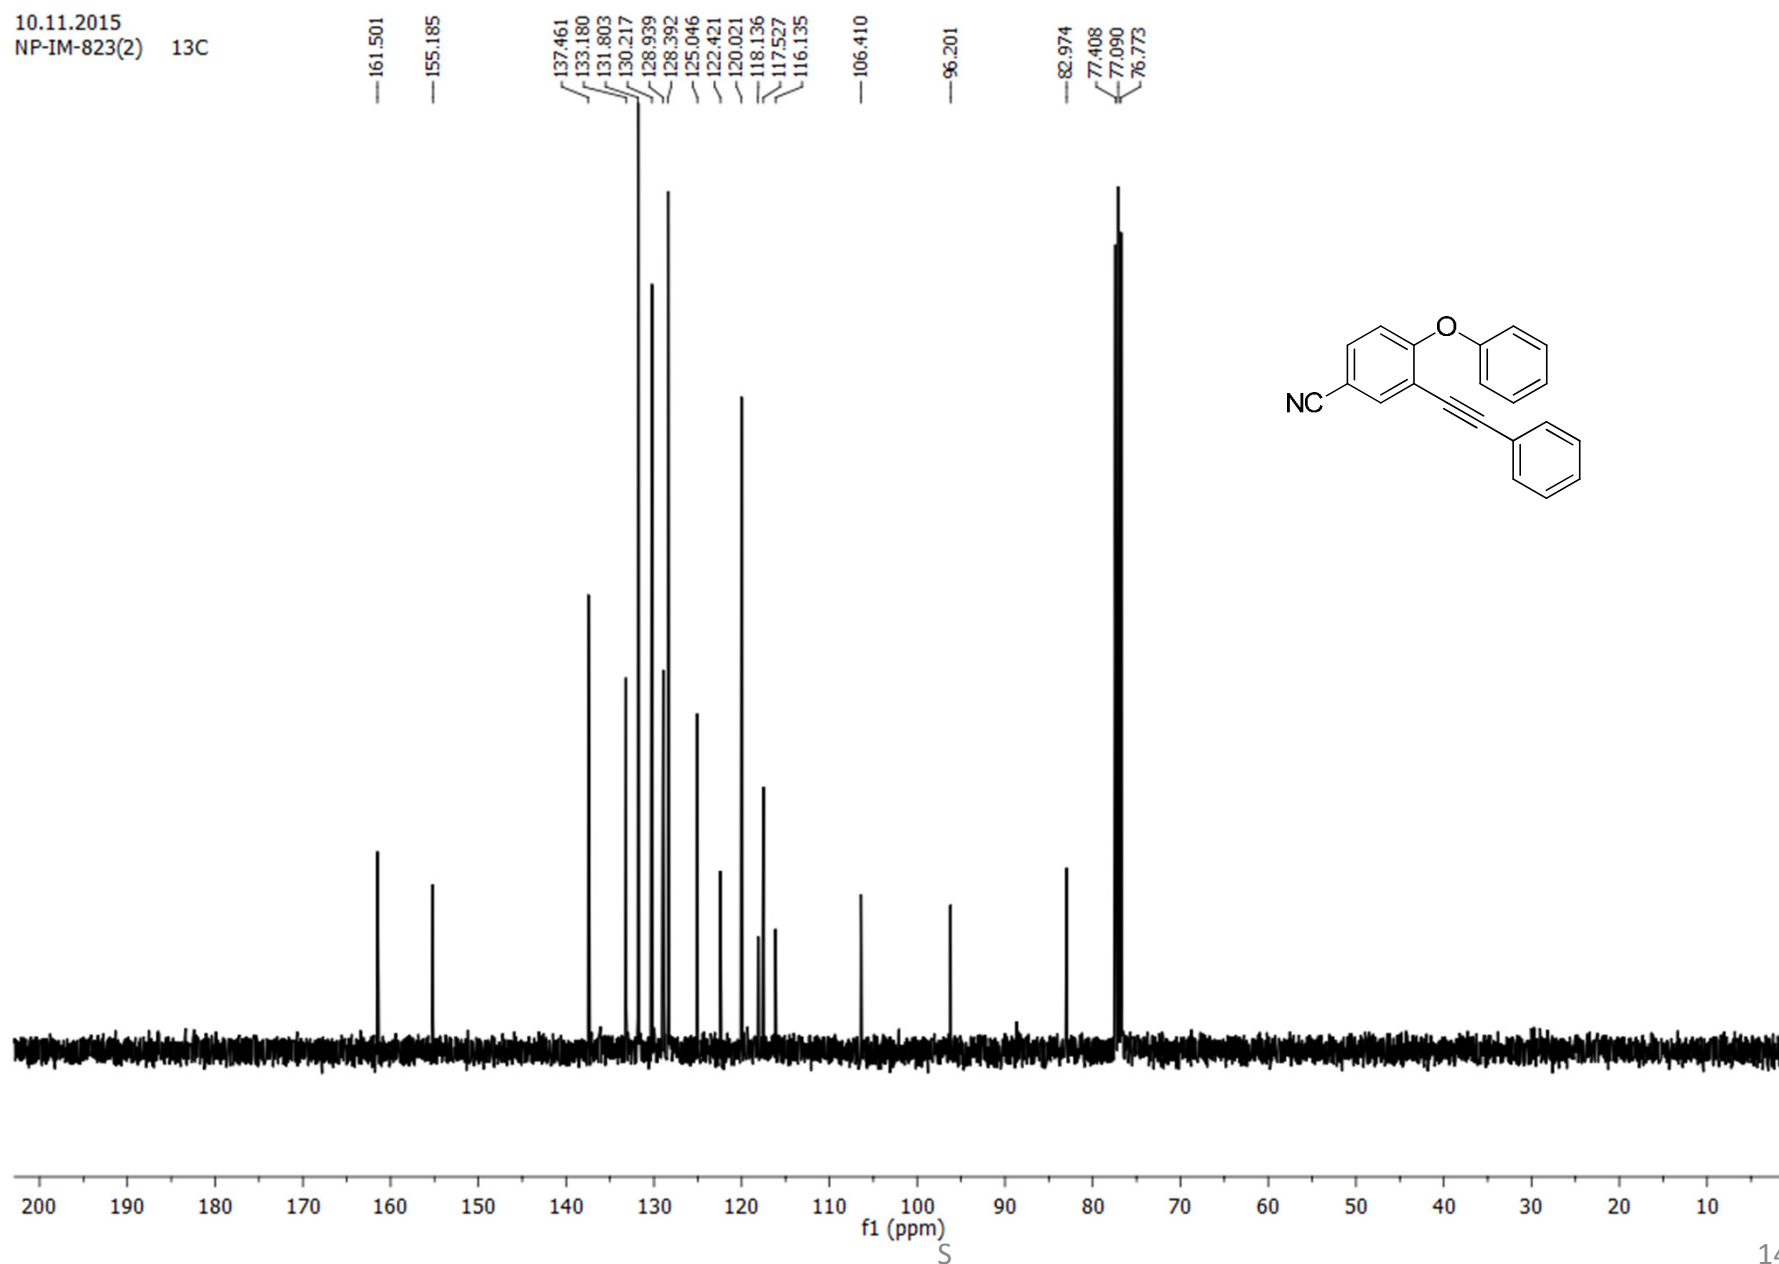

**<sup>1</sup>H NMR of 4-phenoxy-N,N-diphenyl-3-(phenylethynyl)benzamide (2g)**

7.6.2018

1H of NP-IM-SON-P-coNPh2 7.6.2018

7.796  
7.791  
7.786  
7.401  
7.390  
7.372  
7.350  
7.338  
7.328  
7.320  
7.317  
7.307  
7.283  
7.281  
7.255  
7.237  
7.216  
7.196  
7.176  
7.157  
7.139  
7.035  
7.014  
6.739  
6.717

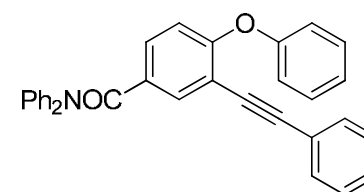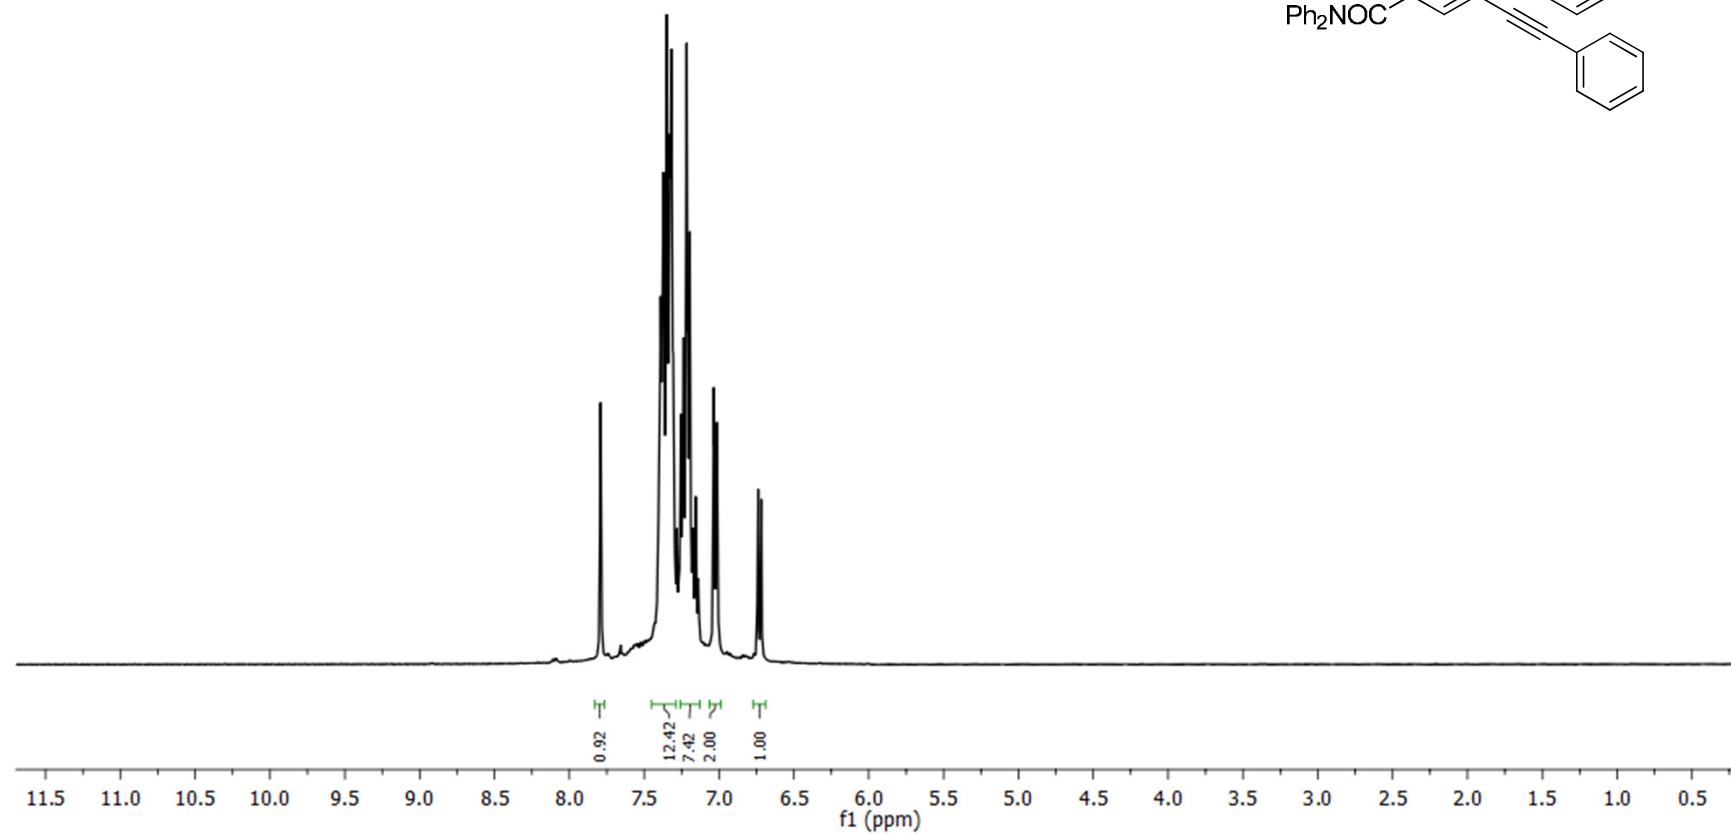

**$^{13}\text{C}$  NMR of 4-phenoxy-N,N-diphenyl-3-(phenylethynyl)benzamide (2g)**

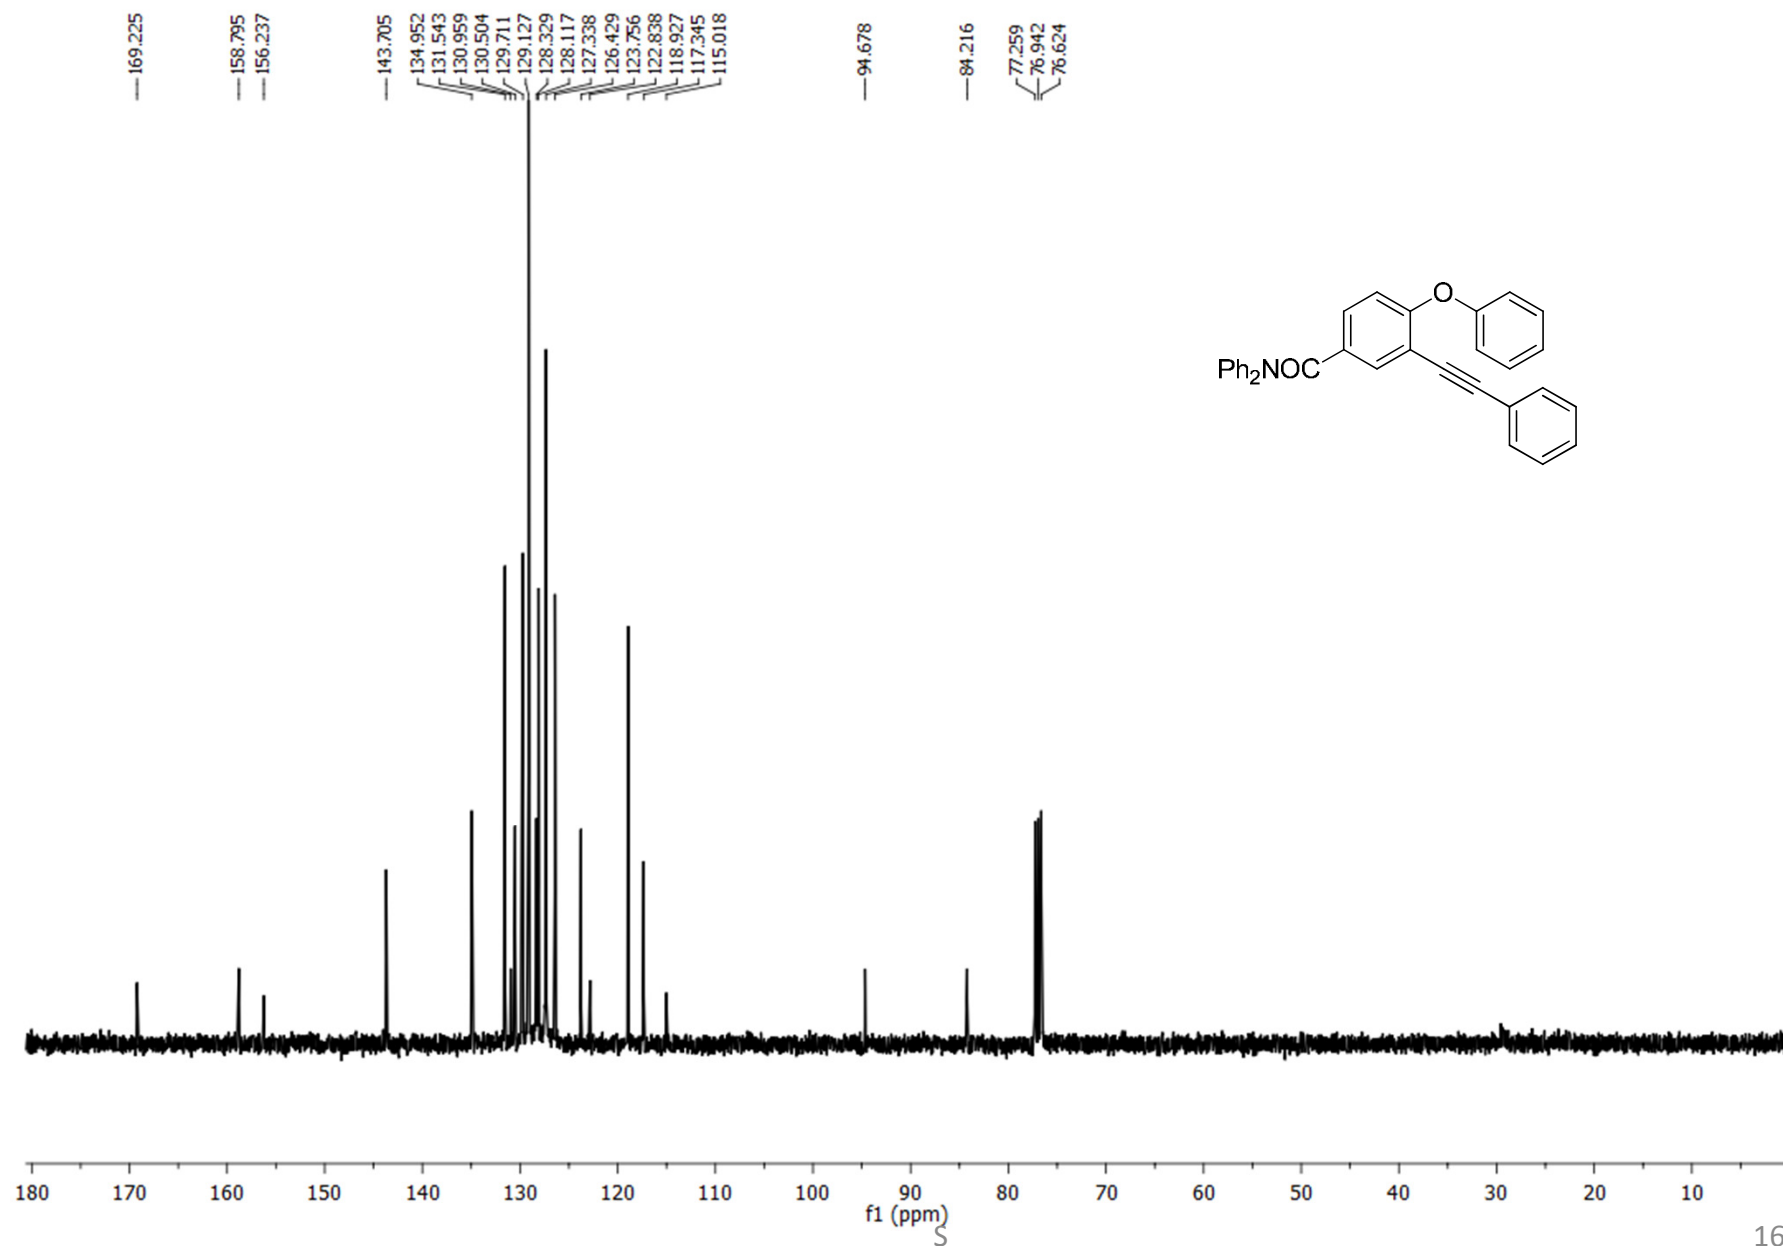

**<sup>1</sup>H NMR of 4-phenoxy-3-(phenylethynyl)benzaldehyde (2h)**

11.4.2018

<sup>1</sup>H of NP-IM-676(P-CHO)

11.4.2018

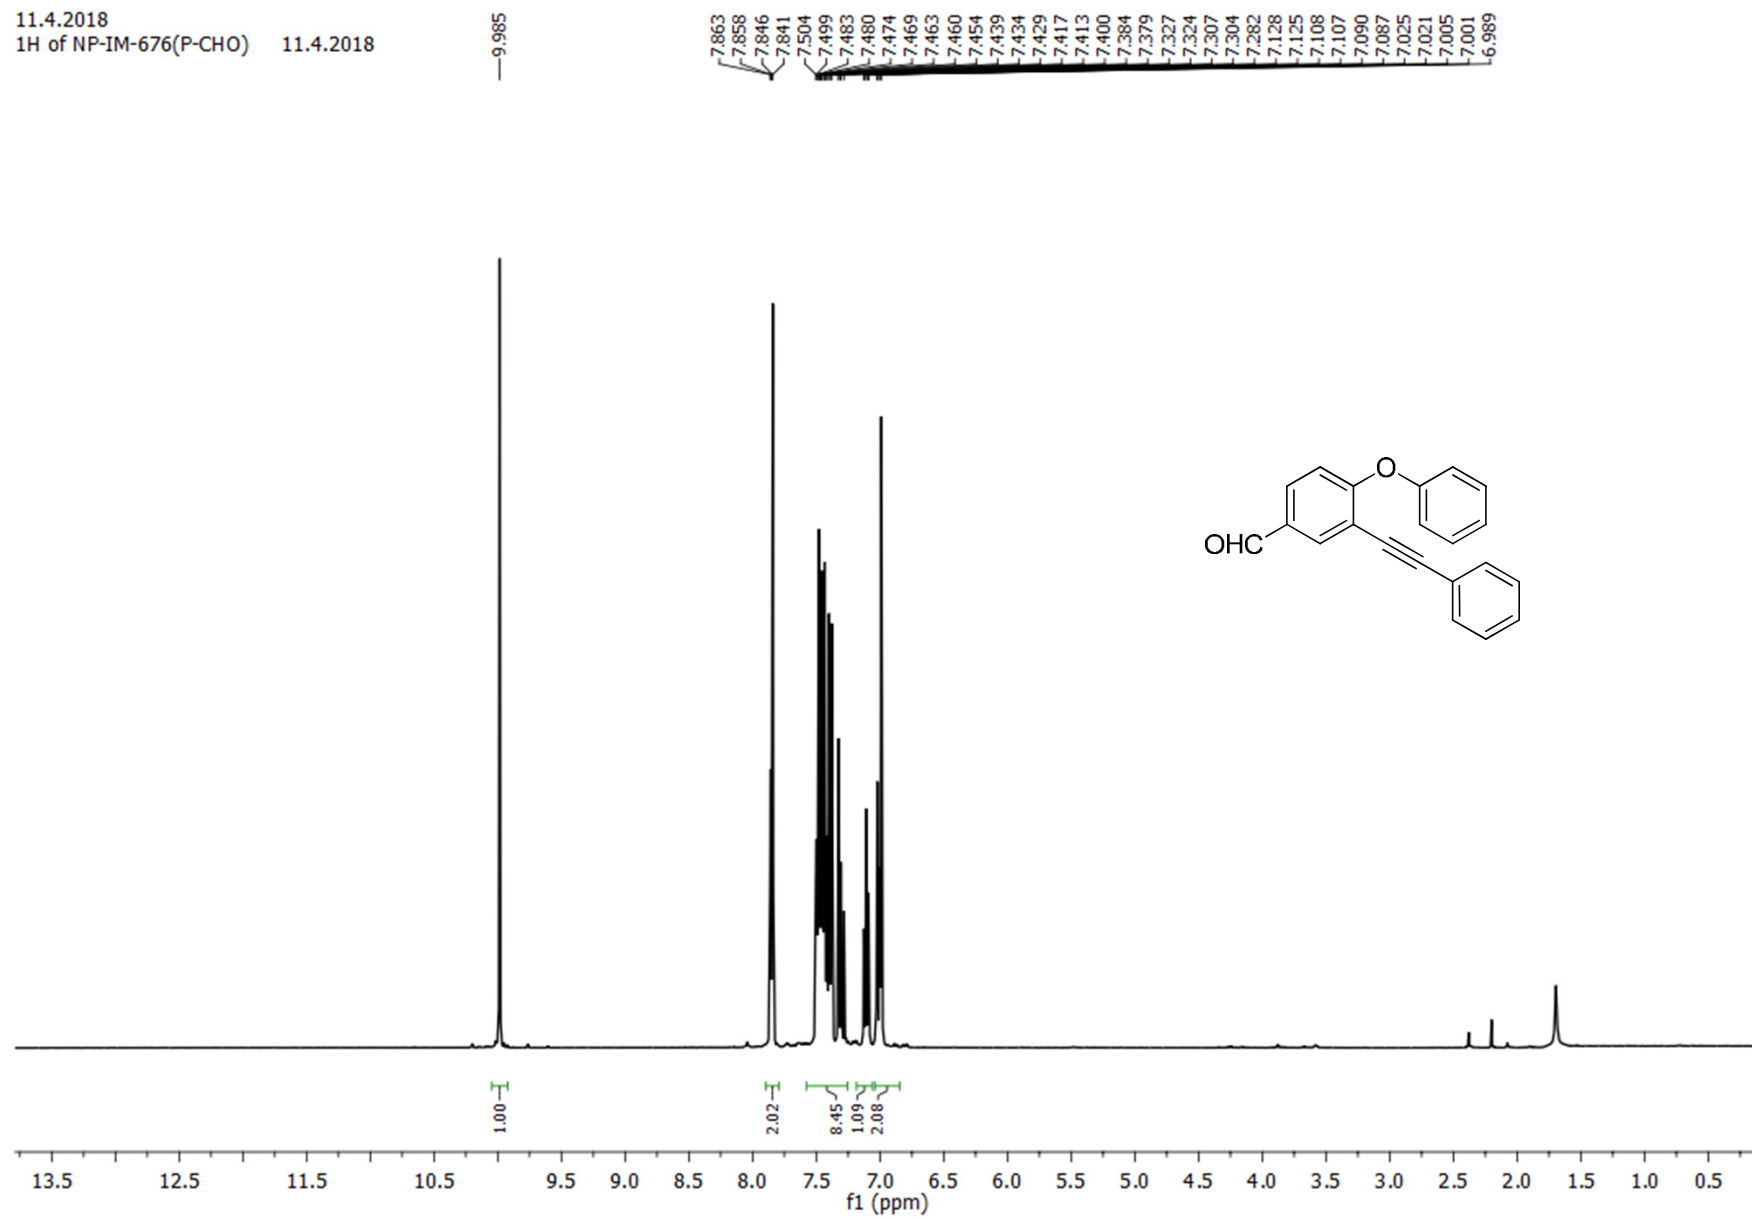

**<sup>13</sup>C NMR of 4-phenoxy-3-(phenylethynyl)benzaldehyde (2h)**

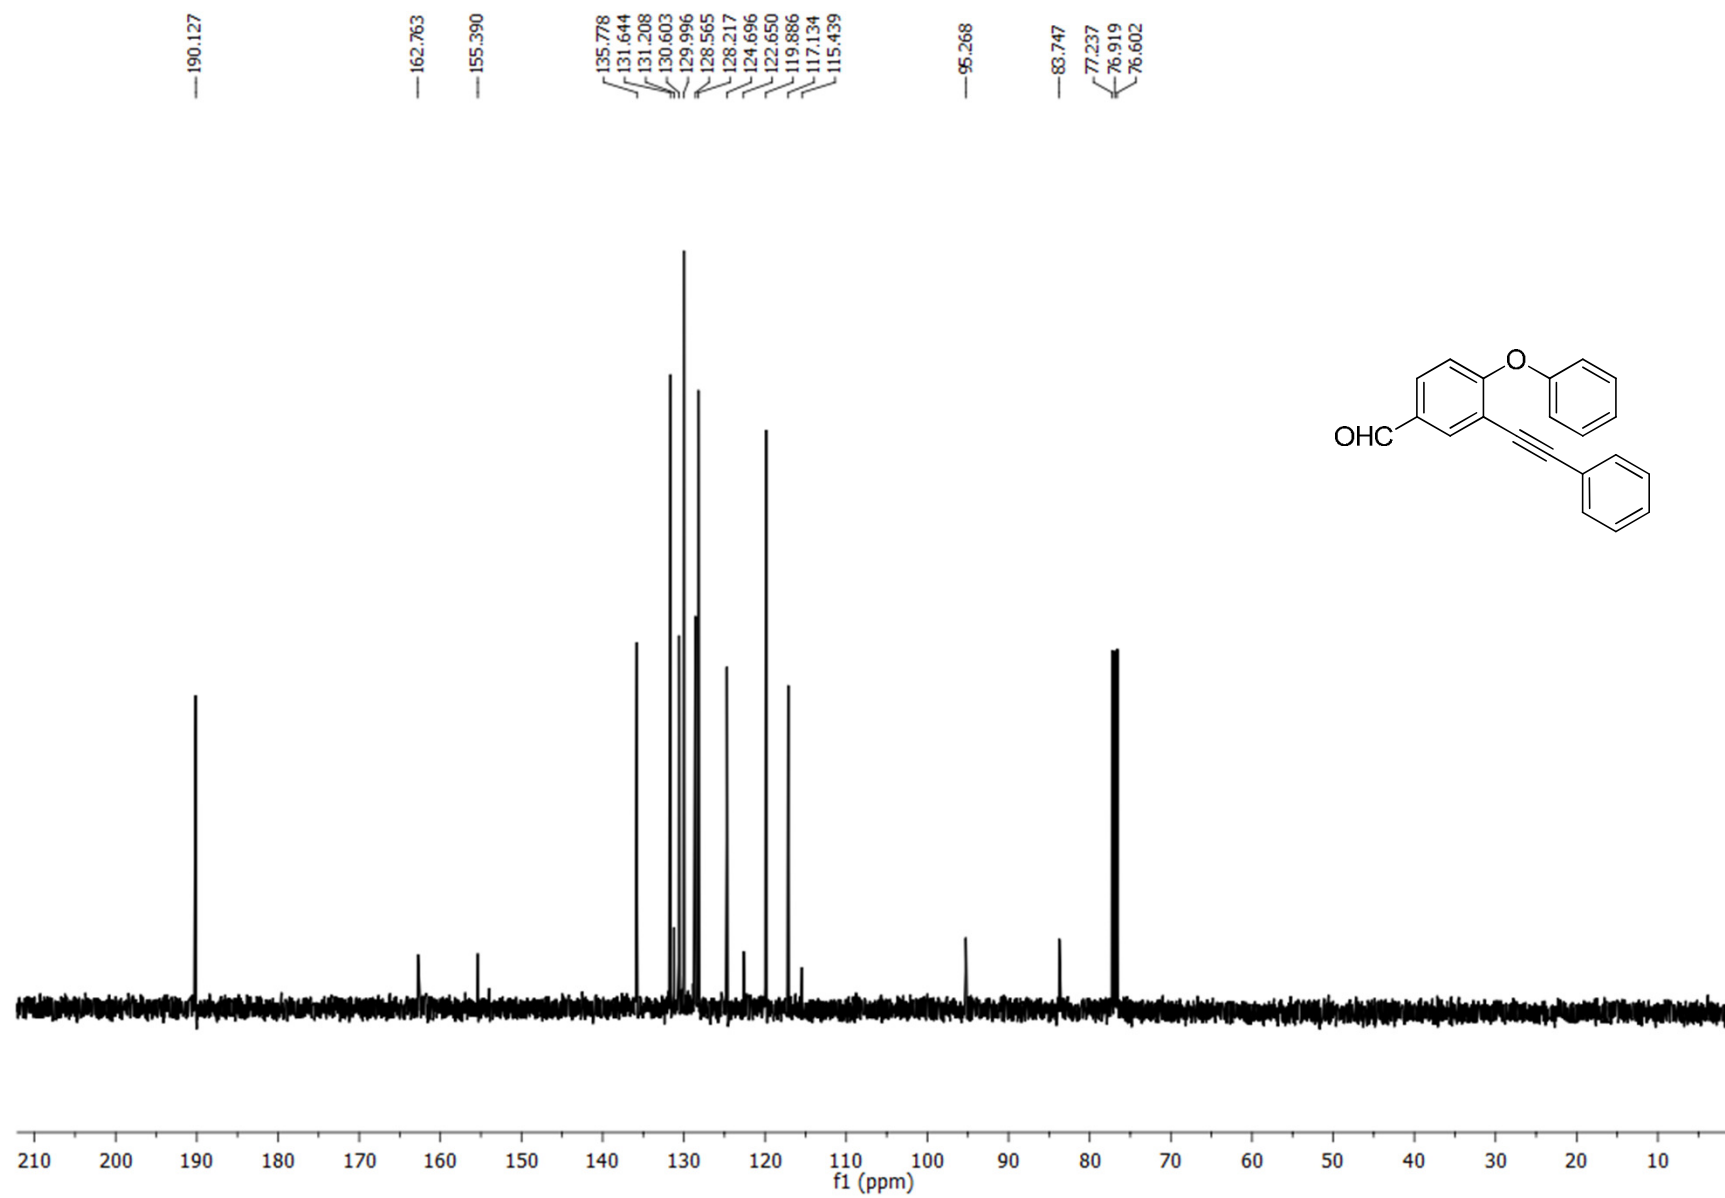

# <sup>1</sup>H NMR of 1-nitro-3-phenoxy-2-(phenylethynyl)benzene (2i)

7.6.2018  
1H of NP-IM-SON-3-NO2 7.6.2018

8.727  
8.720  
8.632  
8.625  
7.409  
7.404  
7.390  
7.388  
7.381  
7.374  
7.369  
7.359  
7.356  
7.322  
7.303  
7.285  
7.282  
7.200  
7.181  
7.162  
7.160  
7.153  
7.151  
7.134  
7.130  
7.016  
7.013  
6.994

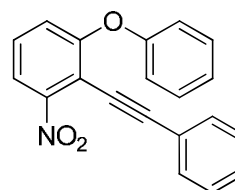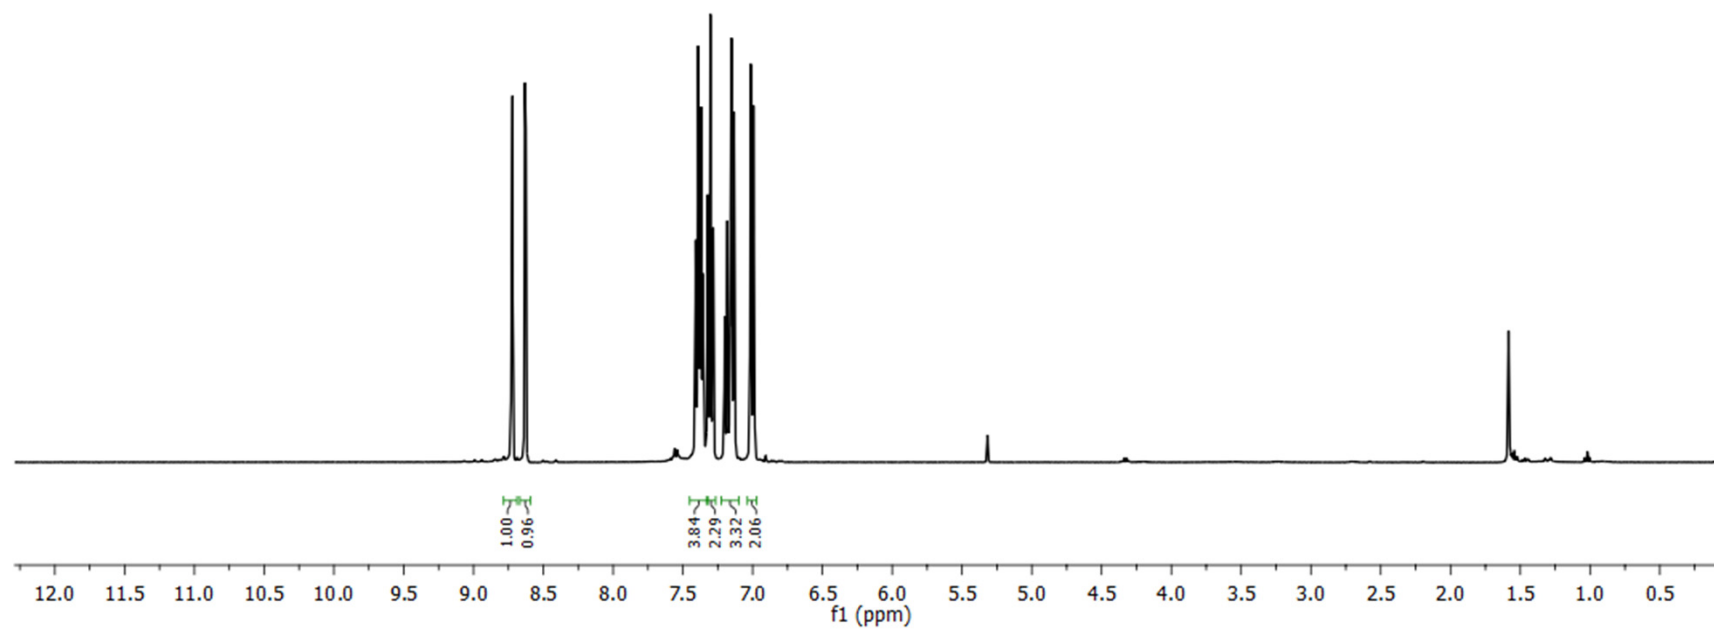

**$^{13}\text{C}$  NMR of 1-nitro-3-phenoxy-2-(phenylethynyl)benzene (2i)**

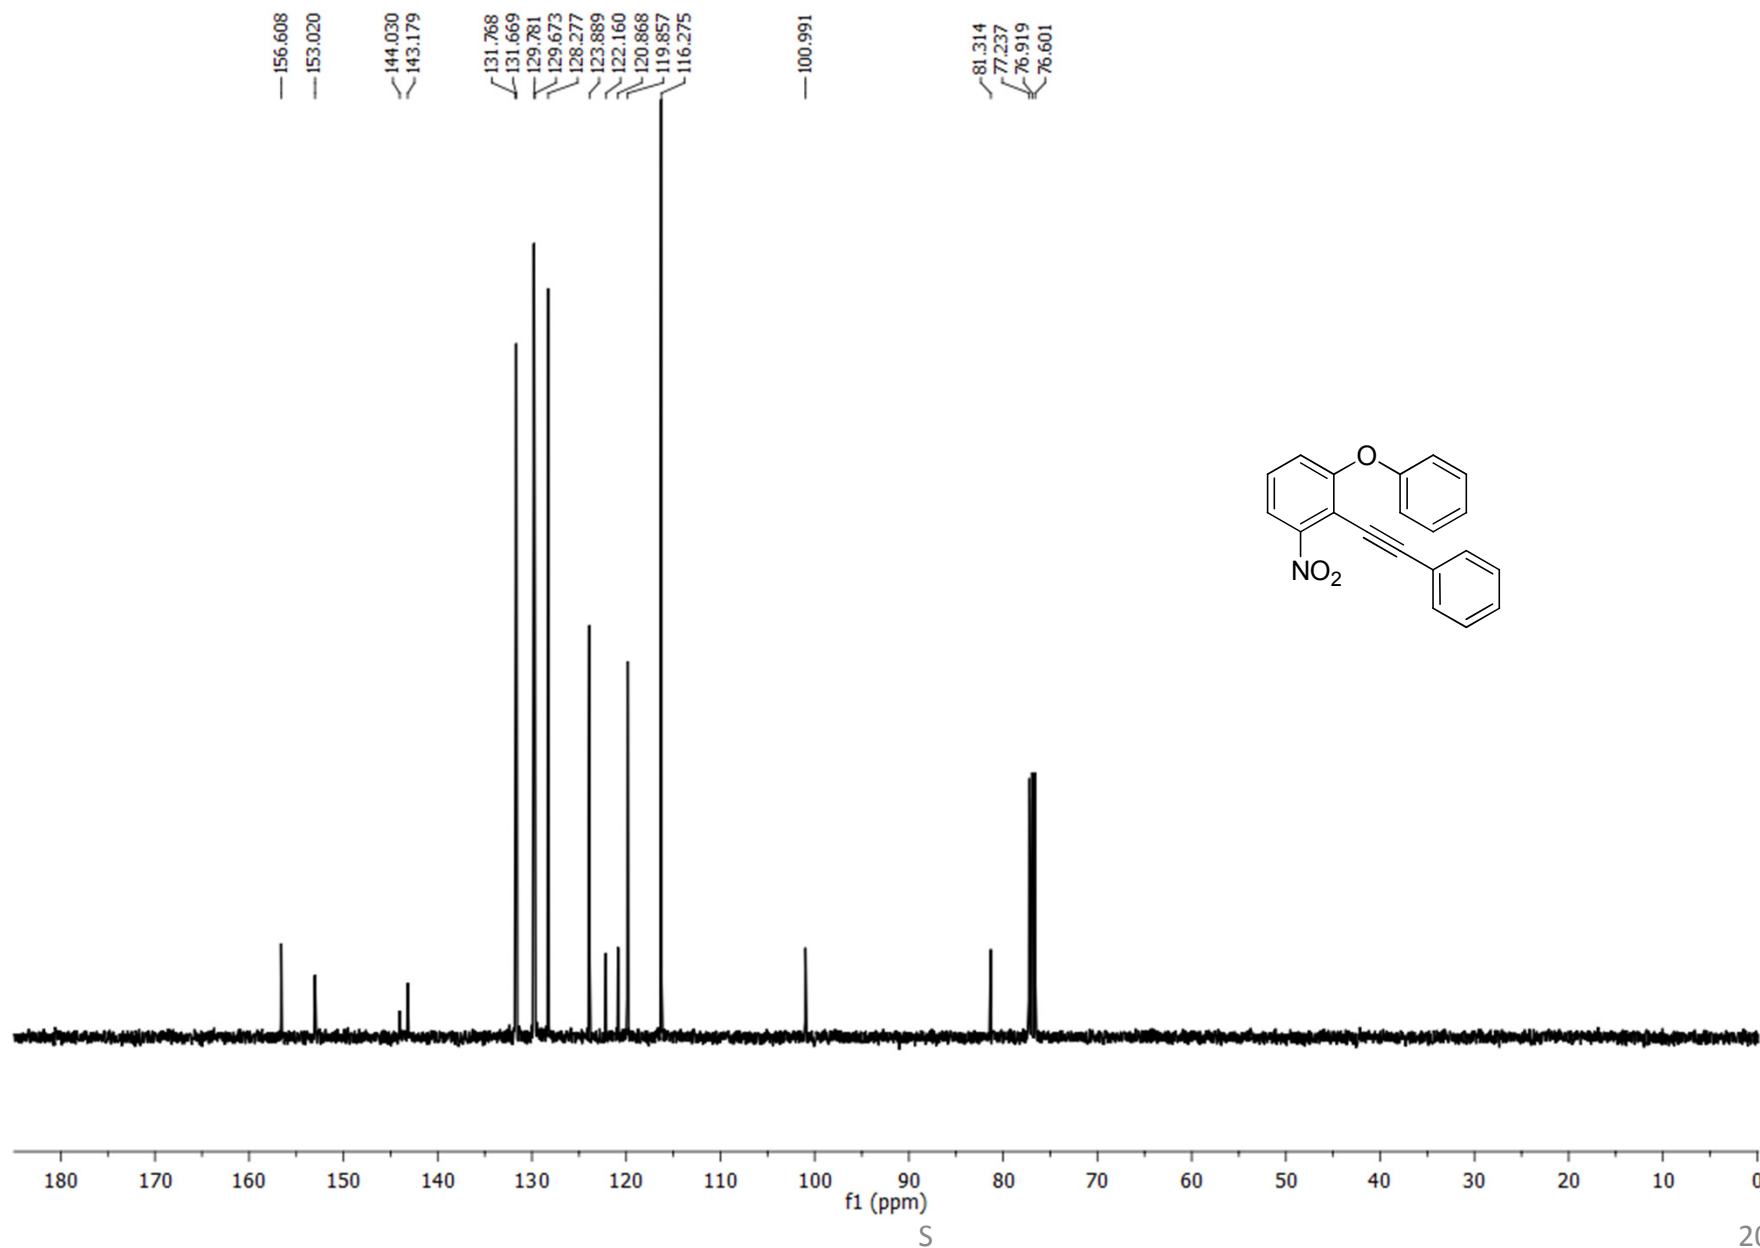



**<sup>1</sup>H NMR of 4-nitro-2-(phenylethynyl)-1-(p-tolyloxy)benzene (2k)**

5.6.2018

<sup>1</sup>H of NP-IM-SON-p-Me-P-NO<sub>2</sub> 5.6.2018

8.482  
8.476  
8.103  
8.097  
8.081  
8.063  
7.558  
7.549  
7.539  
7.386  
7.381  
7.373  
7.277  
7.256  
7.064  
7.043  
6.855  
6.832

2.413

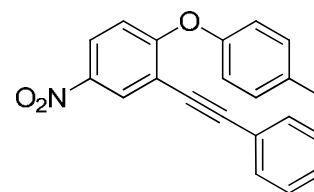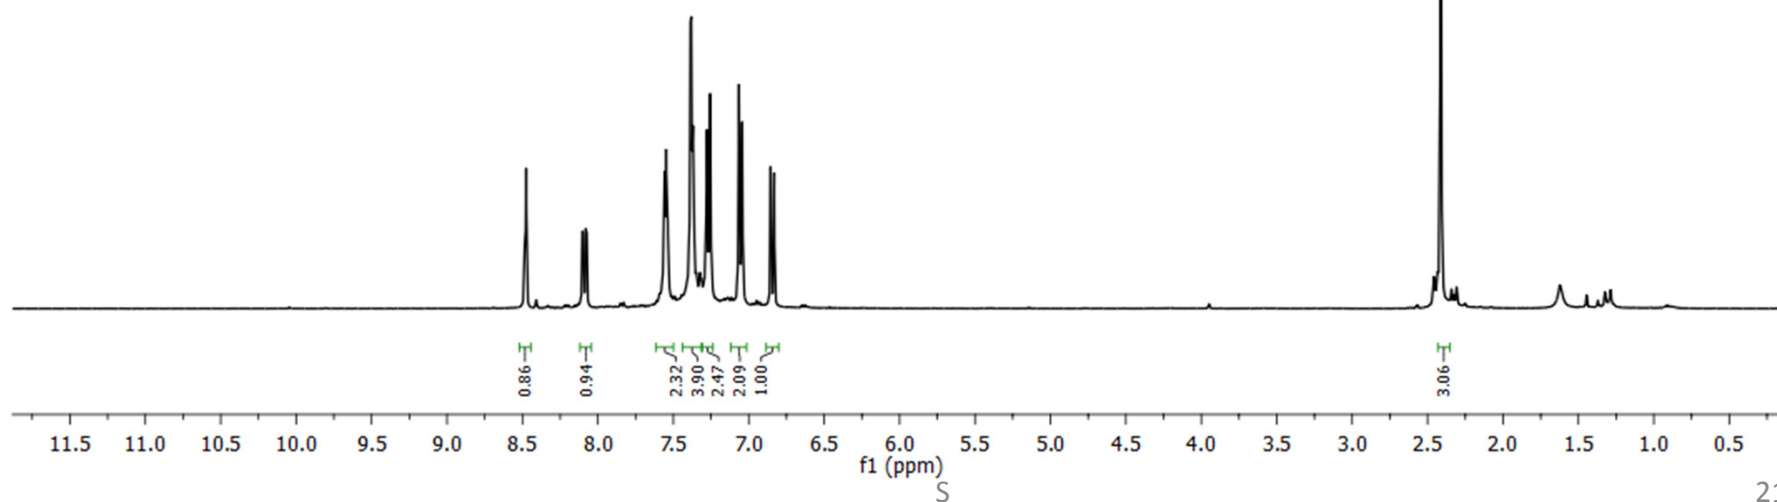

**$^{13}\text{C}$  NMR of 4-nitro-2-(phenylethynyl)-1-(p-tolyloxy)benzene (2k)**

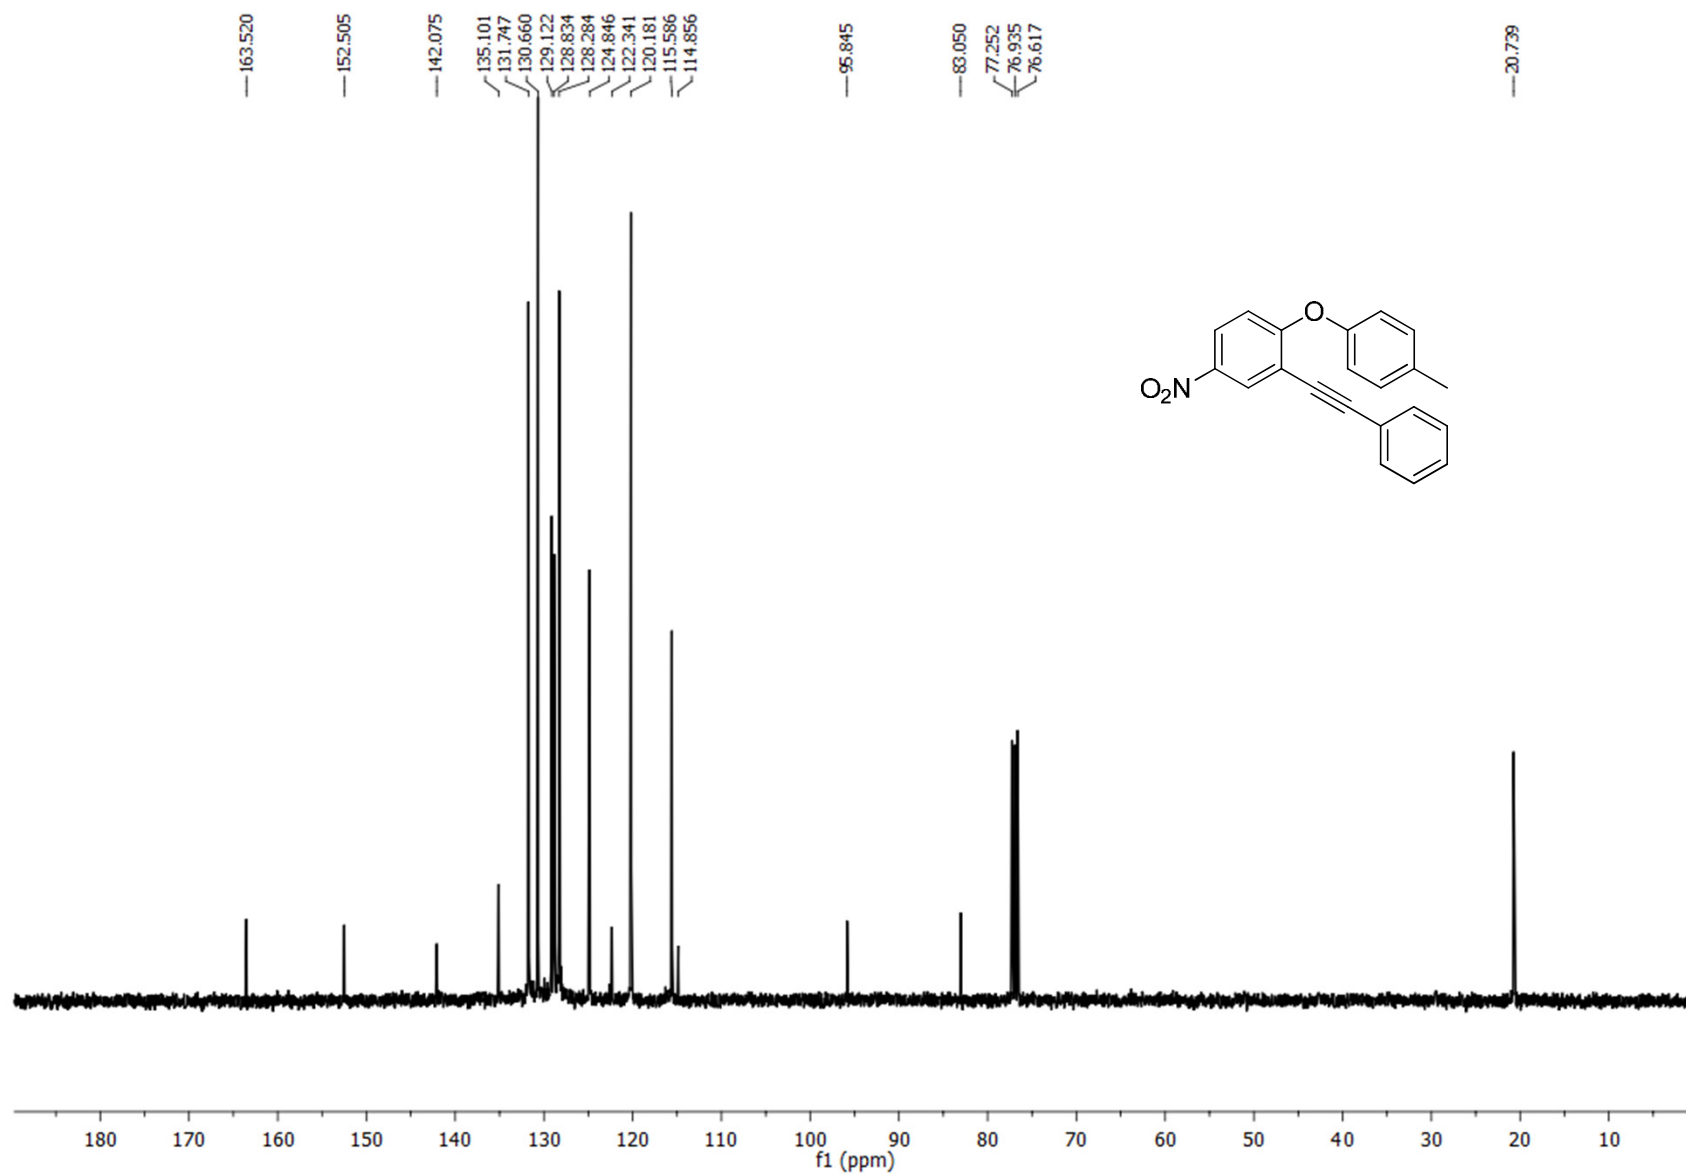

**<sup>1</sup>H NMR of 4-nitro-1-(4-nitrophenoxy)-2-(phenylethynyl)benzene (2l)**

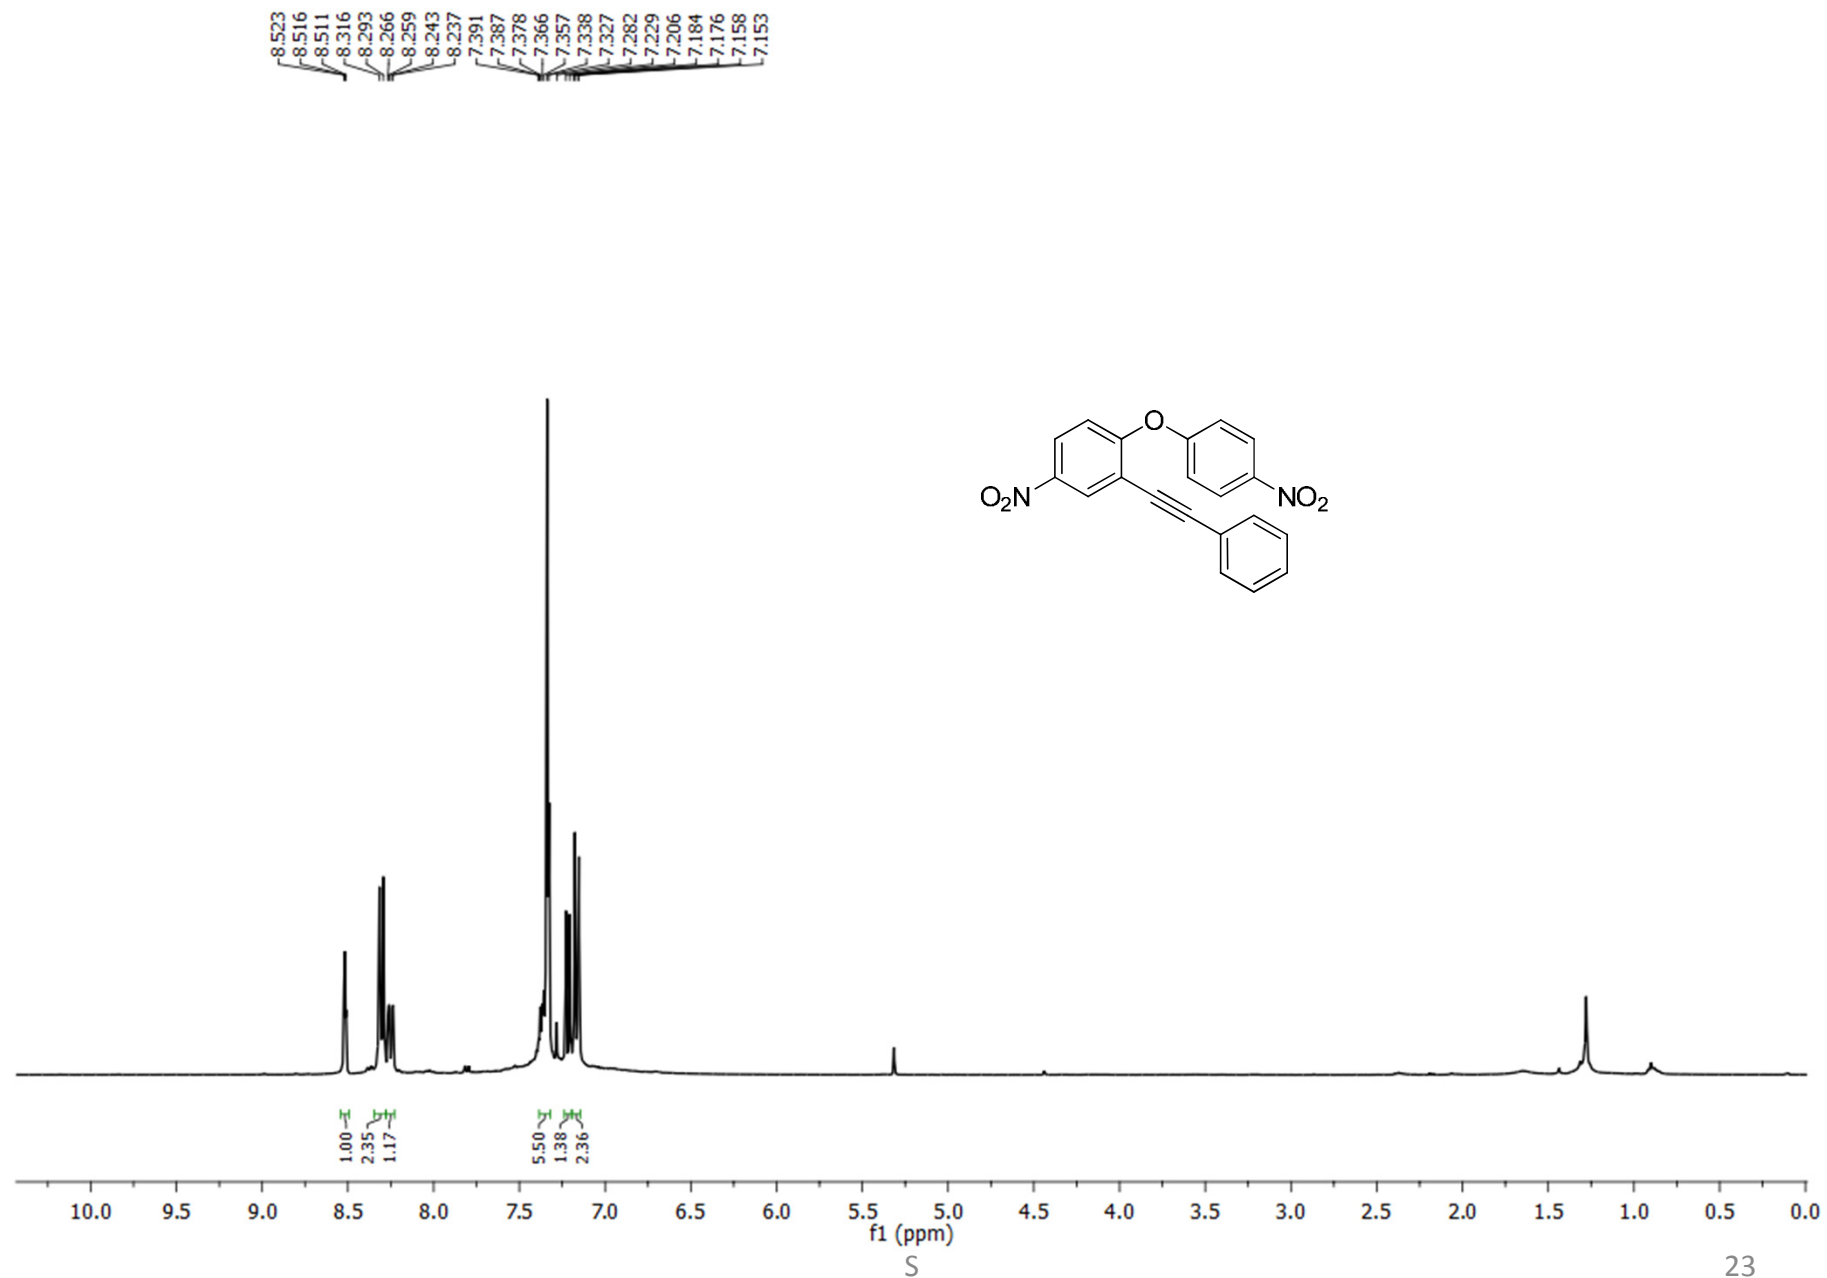

**$^{13}\text{C}$  NMR of 4-nitro-1-(4-nitrophenoxy)-2-(phenylethynyl)benzene (2I)**

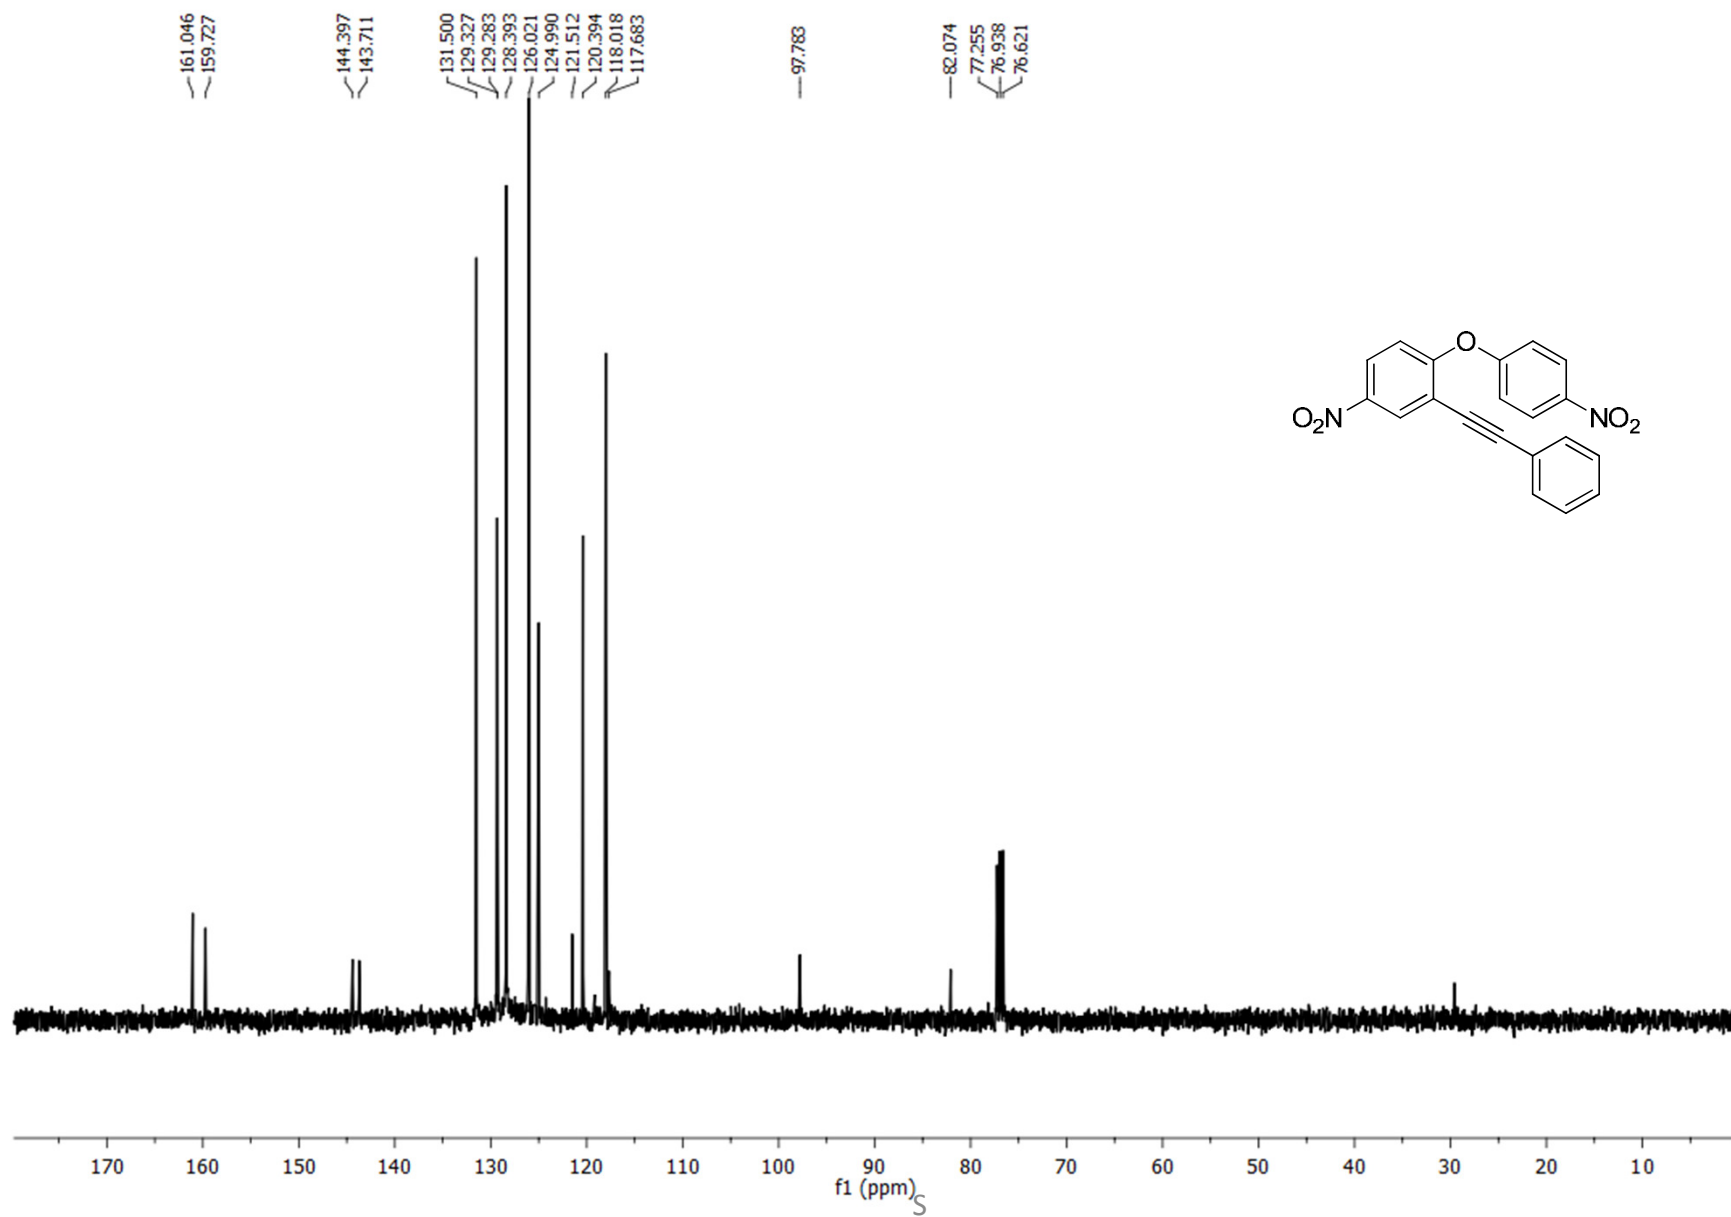

**<sup>1</sup>H NMR of 1-(3-(oct-1-yn-1-yl)-4-phenoxyphenyl)ethanone (2m)**

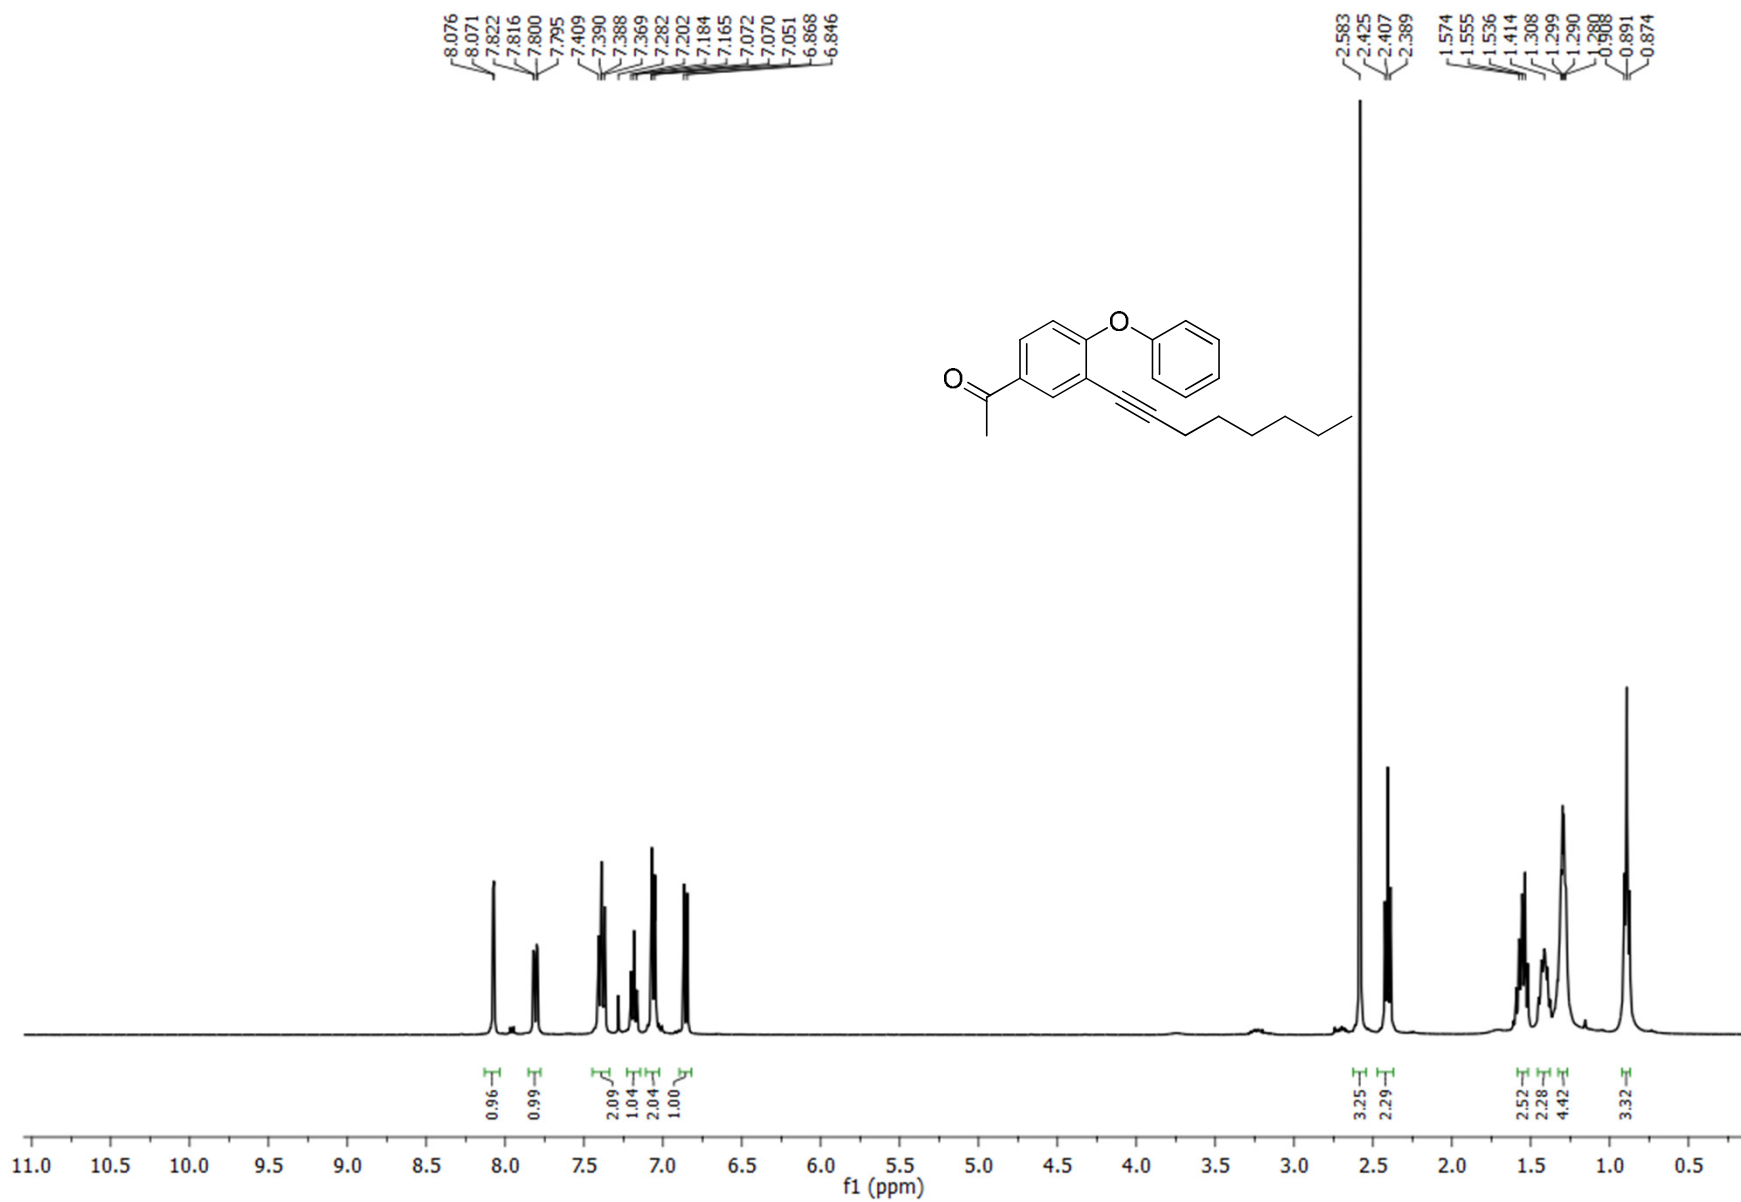

**<sup>13</sup>C NMR of 1-(3-(oct-1-yn-1-yl)-4-phenoxyphenyl)ethanone (2m)**

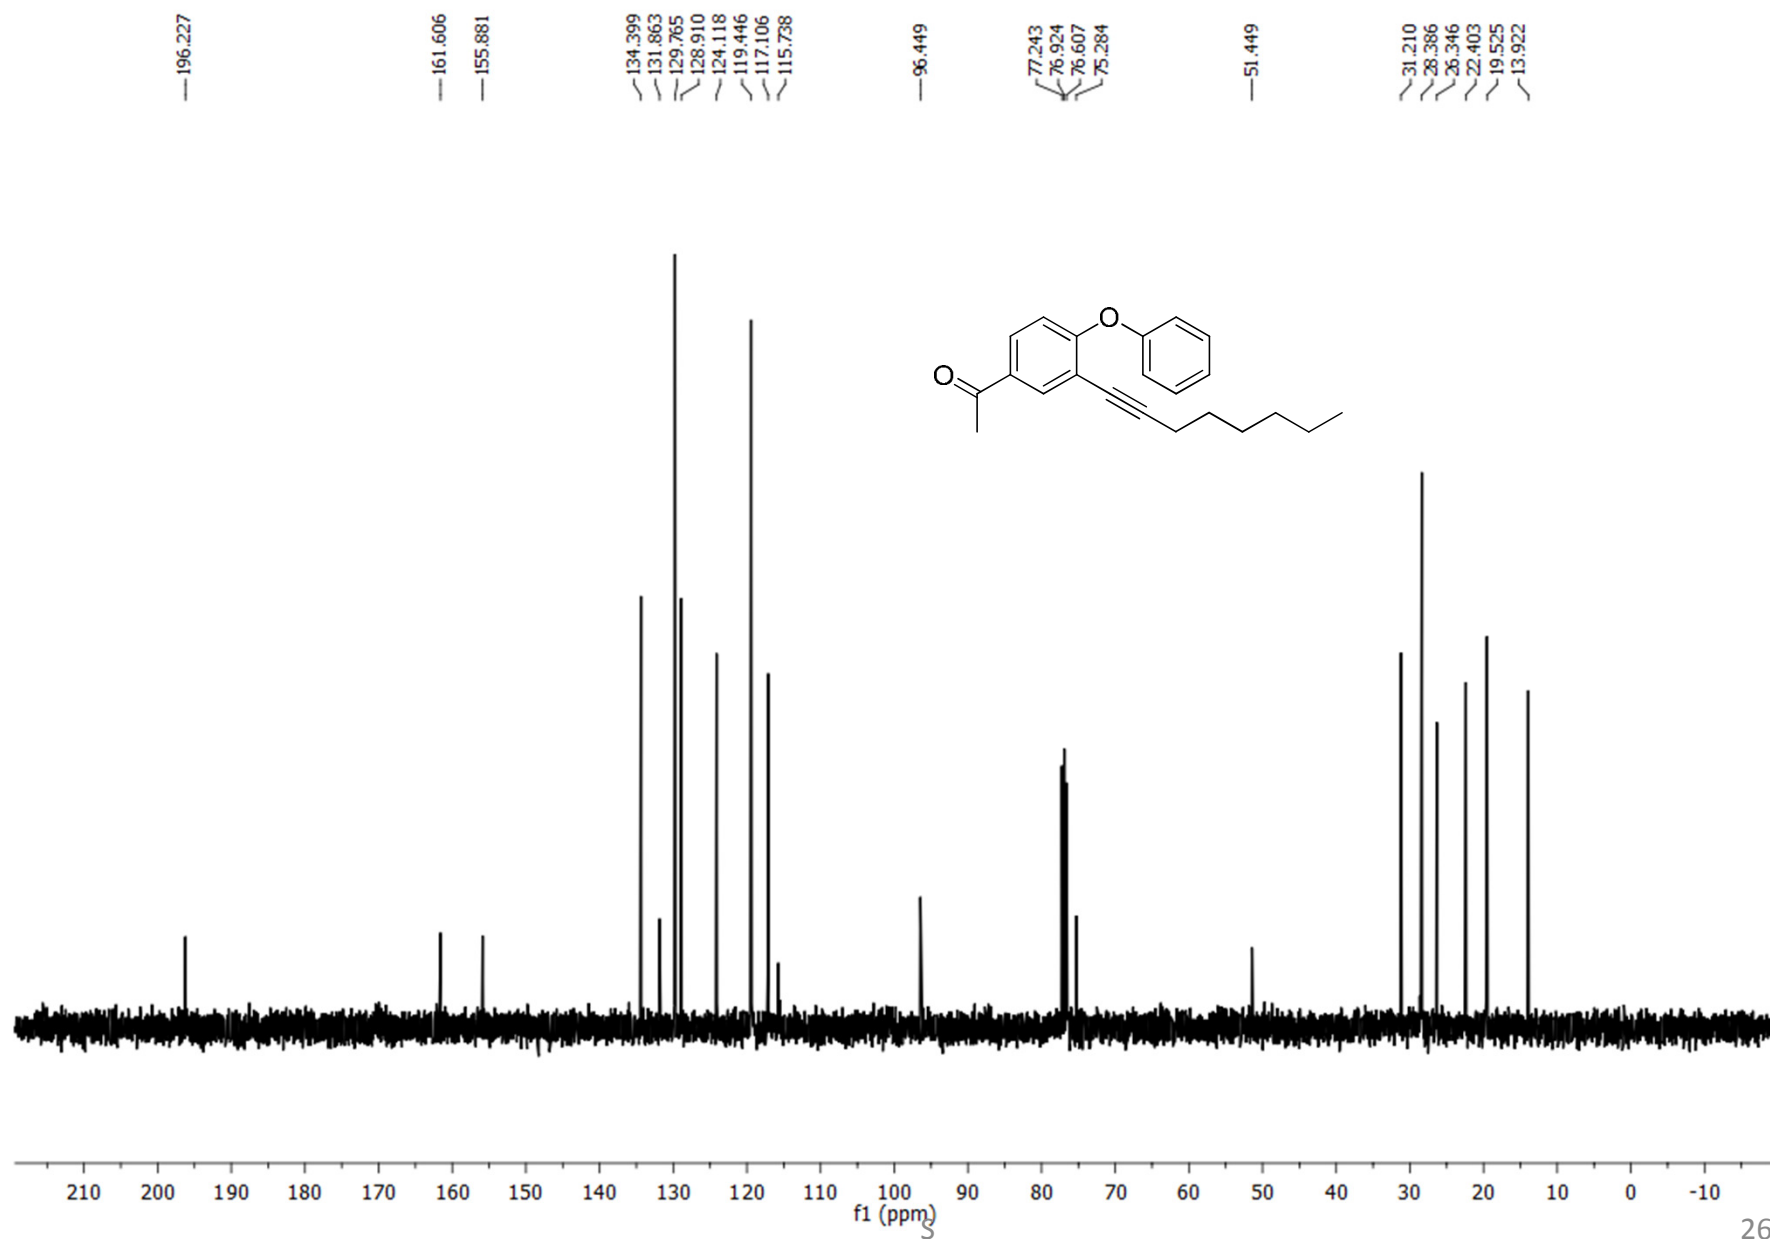

**<sup>1</sup>H NMR of 4-phenoxy-3-(2-phenylethynyl)pyridine (2n)**

<sup>1</sup>H of NP-SO-819 25.8.2018

8.737  
8.371  
8.357  
7.556  
7.549  
7.545  
7.541  
7.540  
7.532  
7.489  
7.470  
7.449  
7.374  
7.366  
7.358  
7.310  
7.292  
7.284  
7.273  
7.183  
7.181  
7.162  
6.676  
6.661

— 1.749

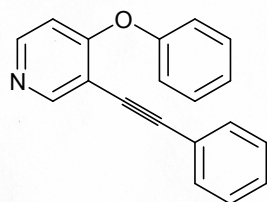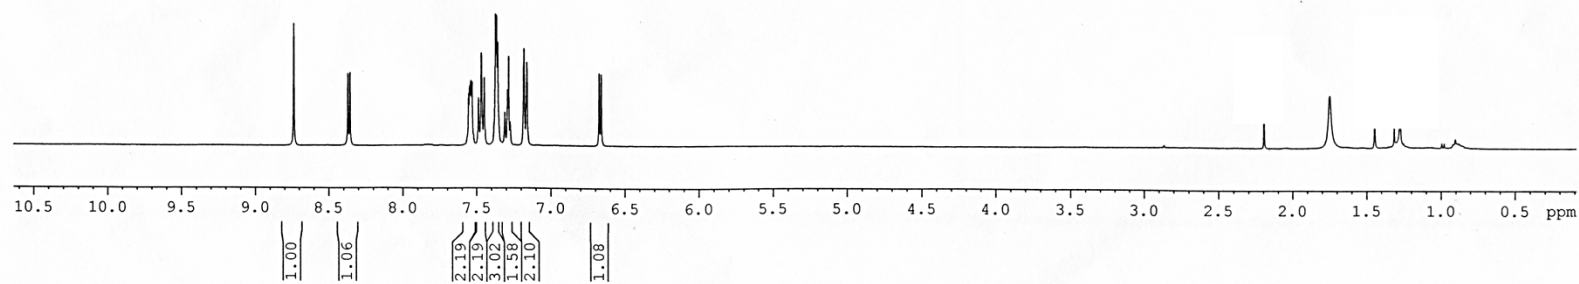

**<sup>13</sup>C NMR of 4-phenoxy-3-(2-phenylethynyl)pyridine (2n)**

<sup>13</sup>C of NP-so-819

25.8.2018

164.61  
154.47  
154.20  
150.17  
131.77  
130.22  
128.72  
128.36  
125.52  
122.74  
120.73  
111.32  
110.49  
96.58  
82.02  
77.36  
77.04  
76.73  
29.72  
14.16

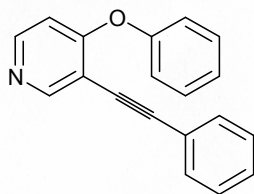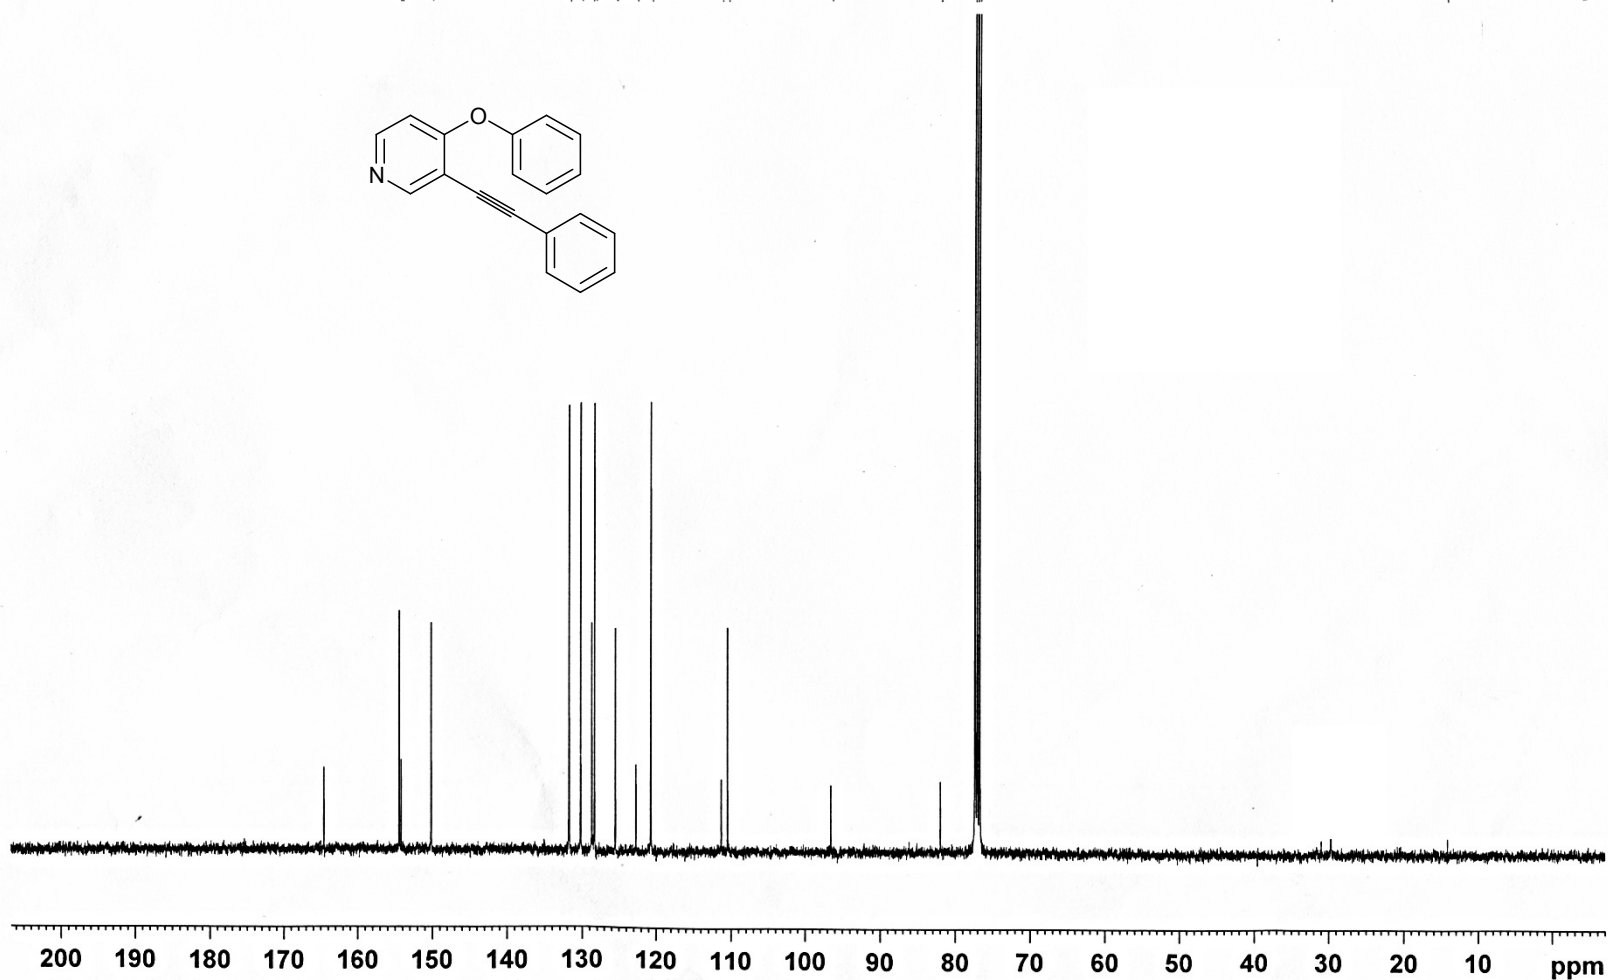



**<sup>1</sup>H NMR of 1-phenoxy-2-(phenylethynyl)benzene (2o)**

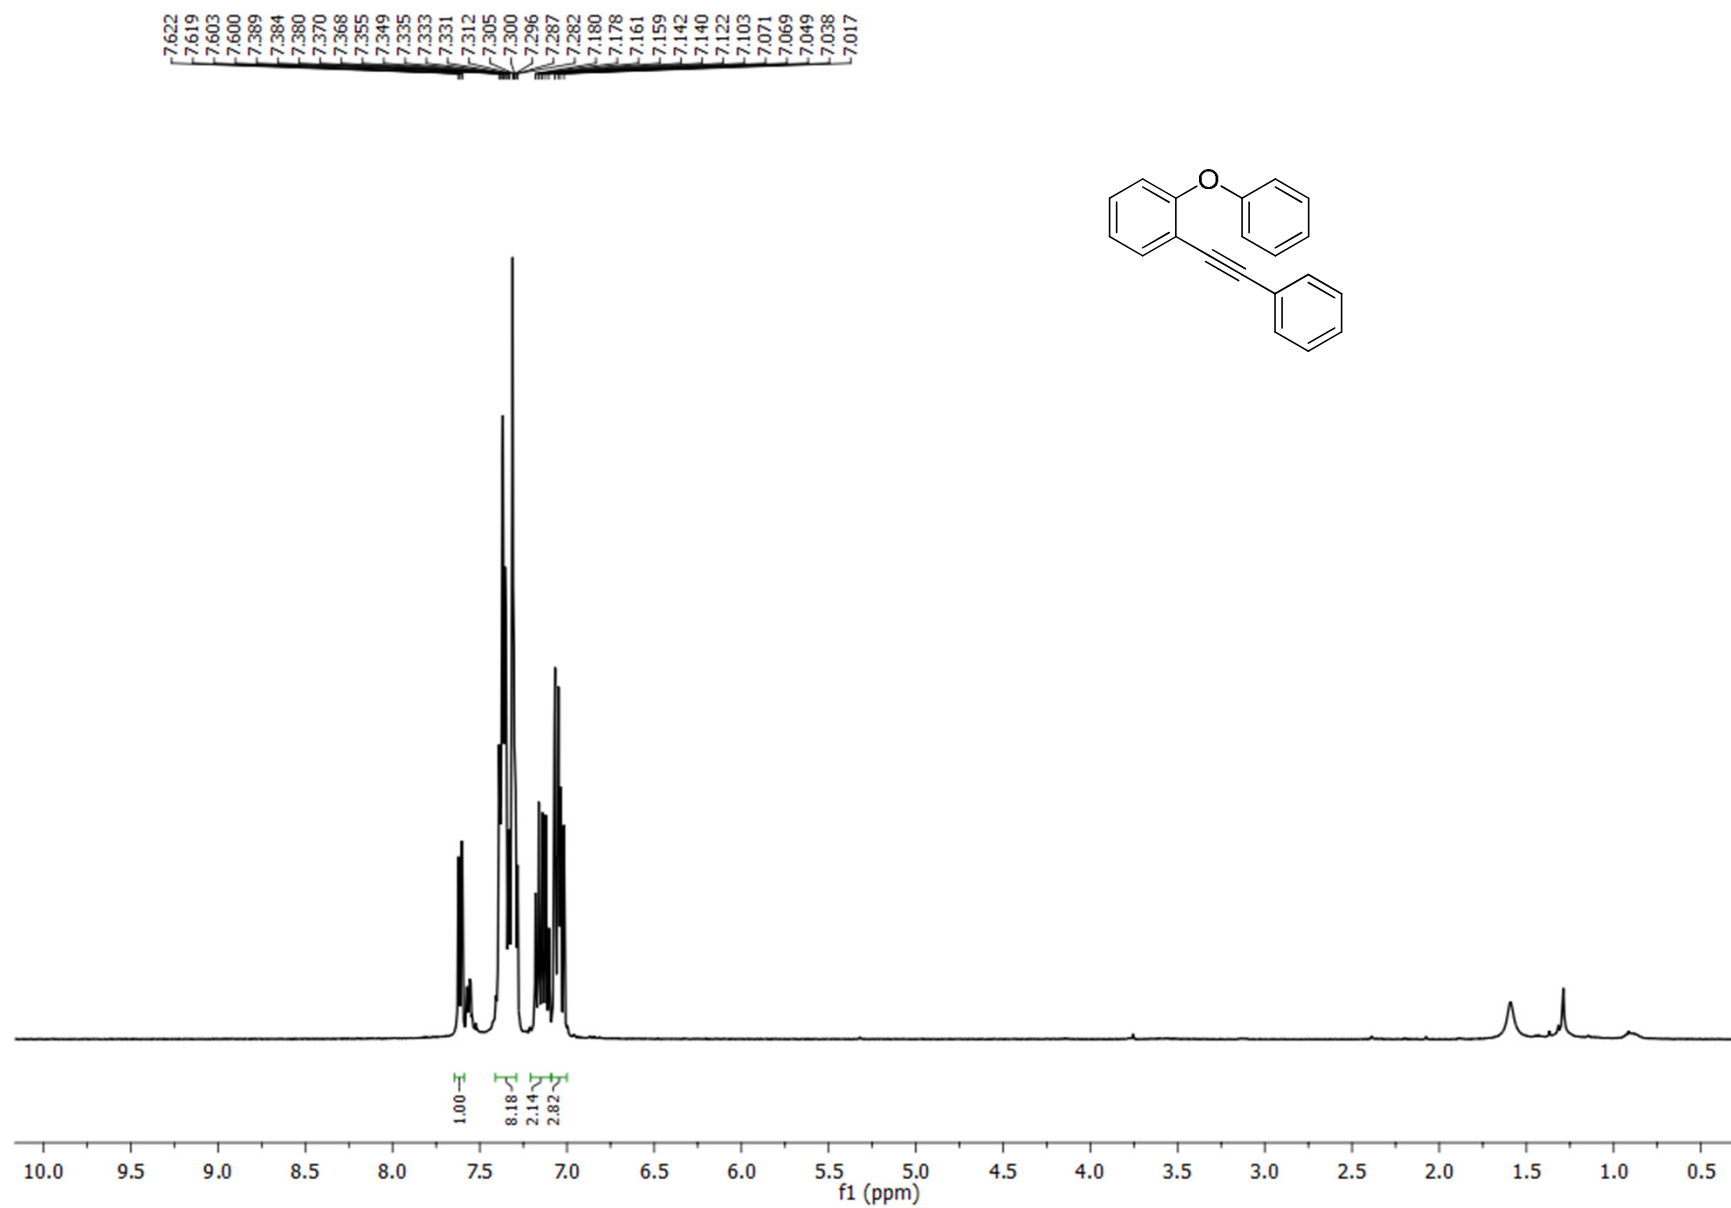

**$^{13}\text{C}$  NMR of 1-phenoxy-2-(phenylethynyl)benzene (2o)**

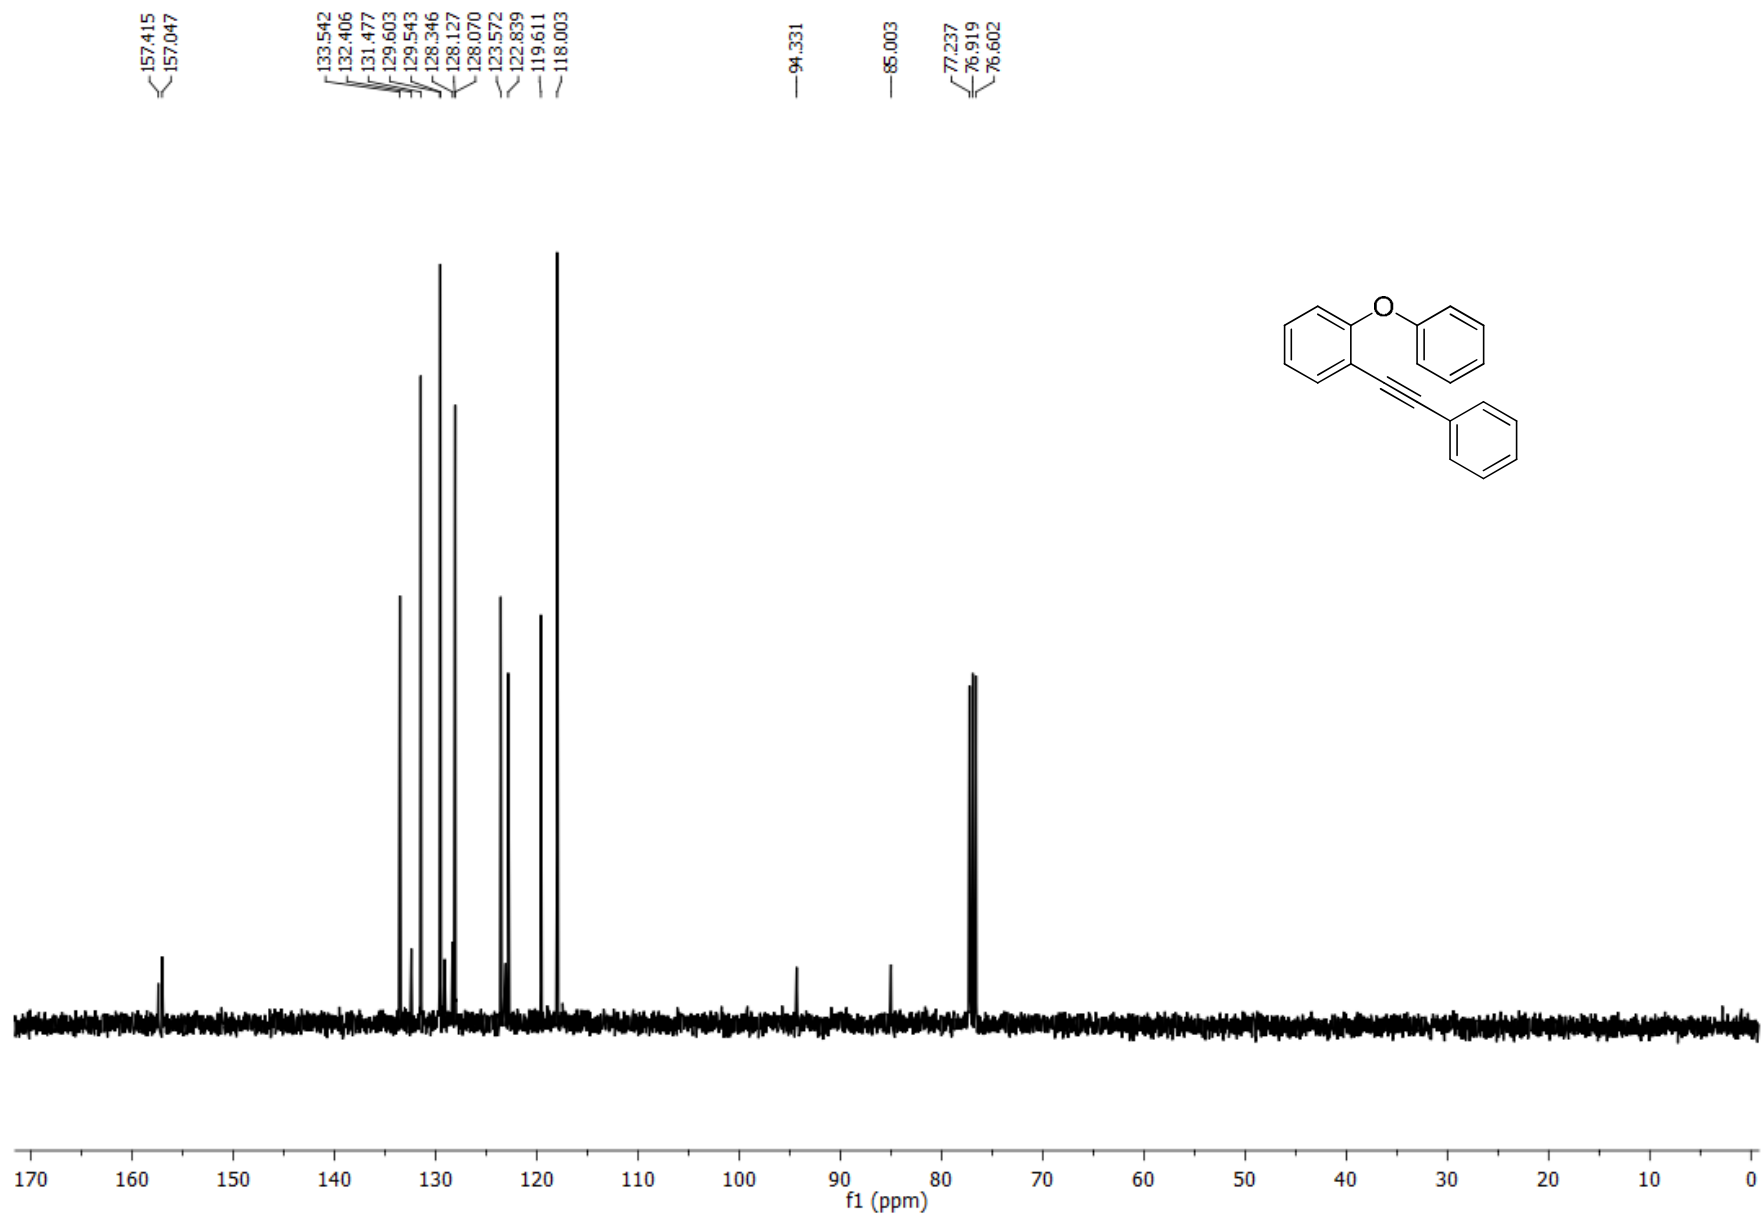

S

# **<sup>1</sup>H NMR of 1-(*p*-toloxy)-2-(2-phenylethynyl)benzene (2p)**

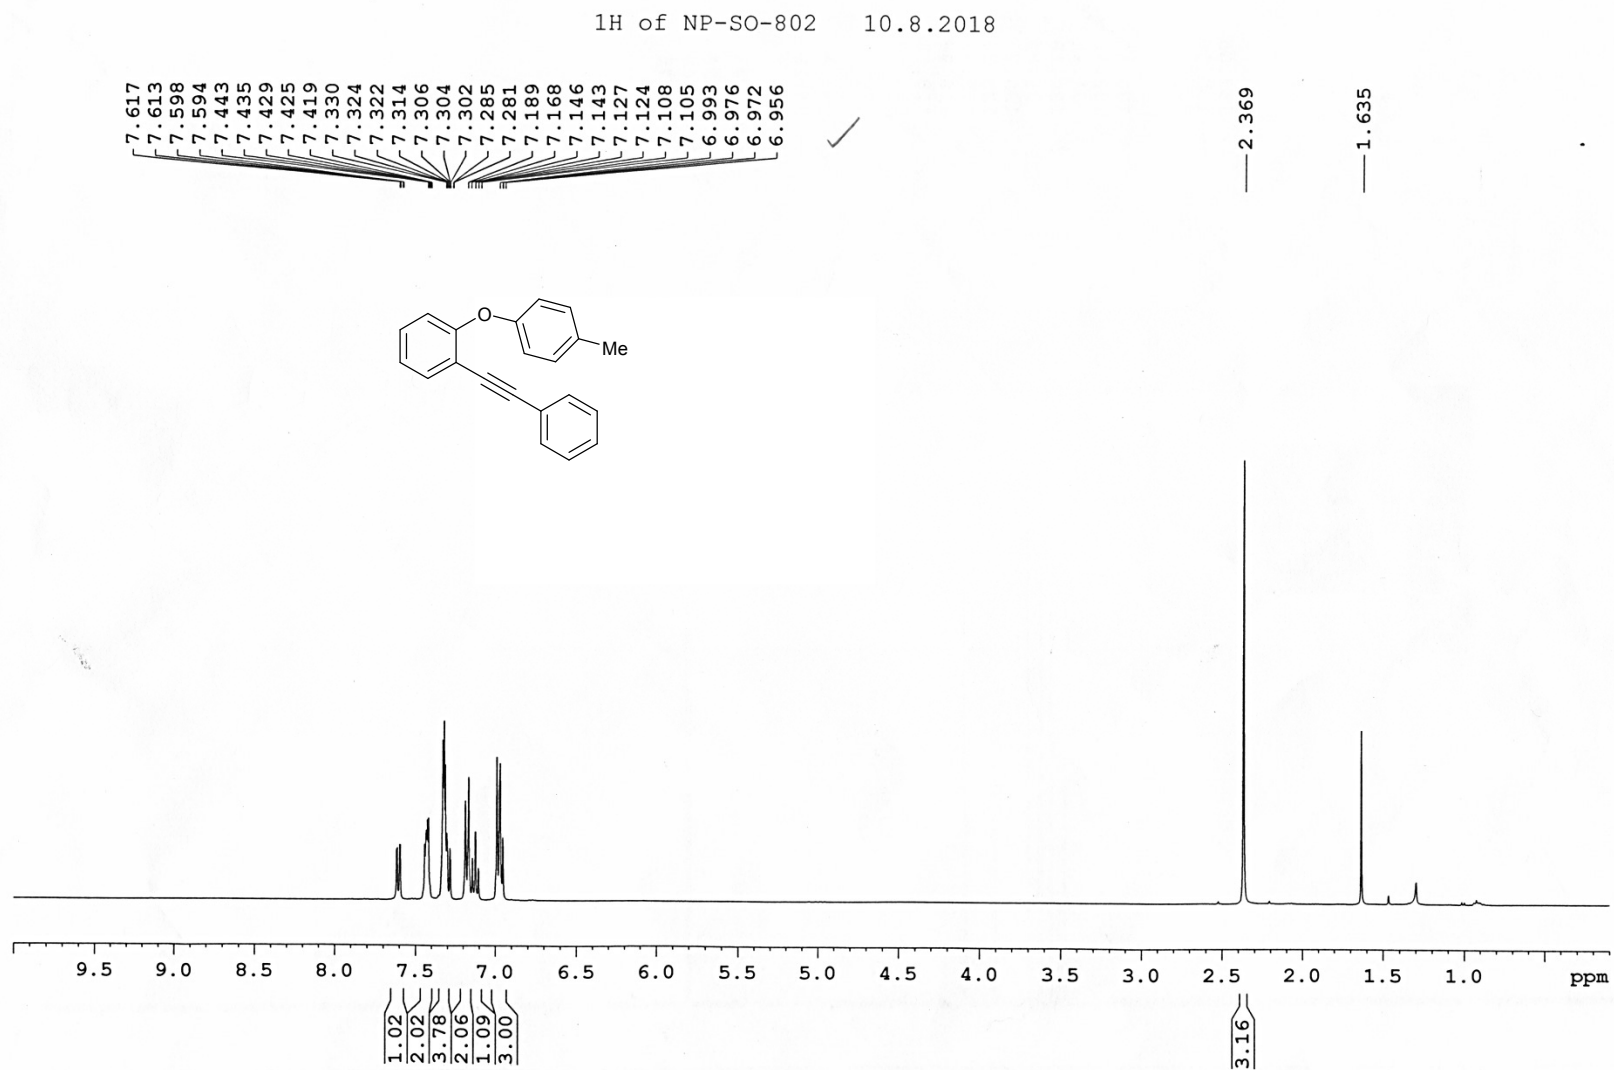

# **<sup>13</sup>C NMR of 1-(*p*-toloxy)-2-(2-phenylethynyl)benzene (2p)**

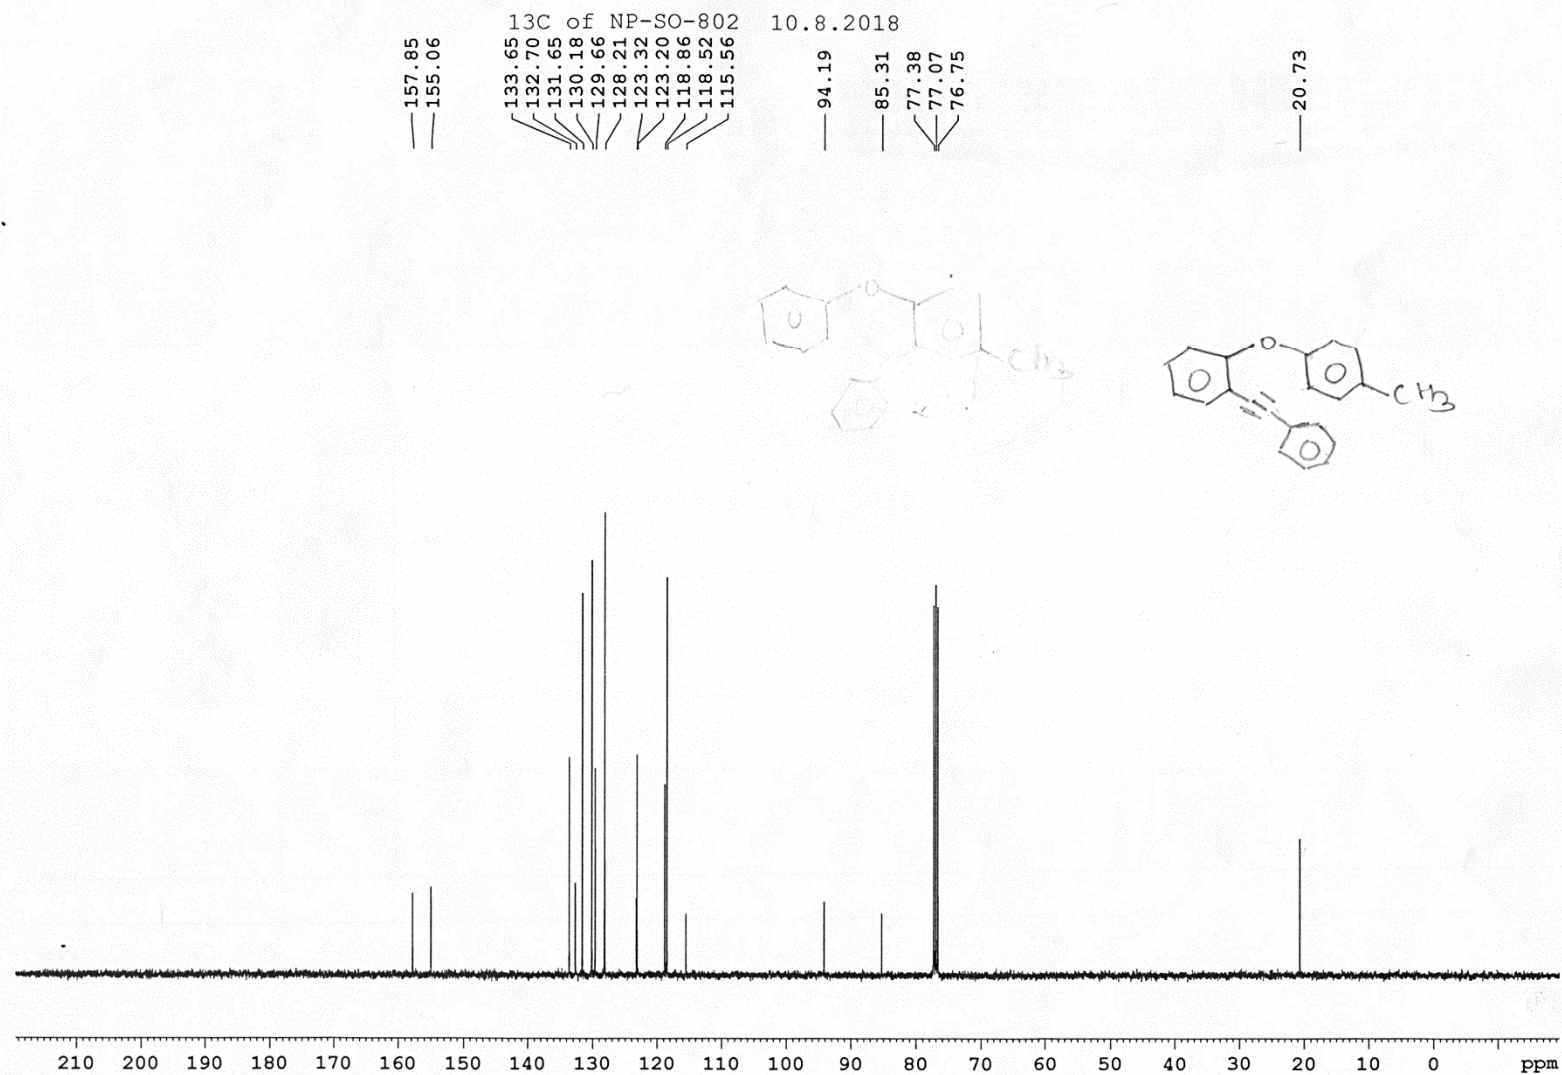

**<sup>1</sup>H NMR of 1-(4-Chlorophenoxy)-2-(2-phenylethynyl)benzene (2q)**

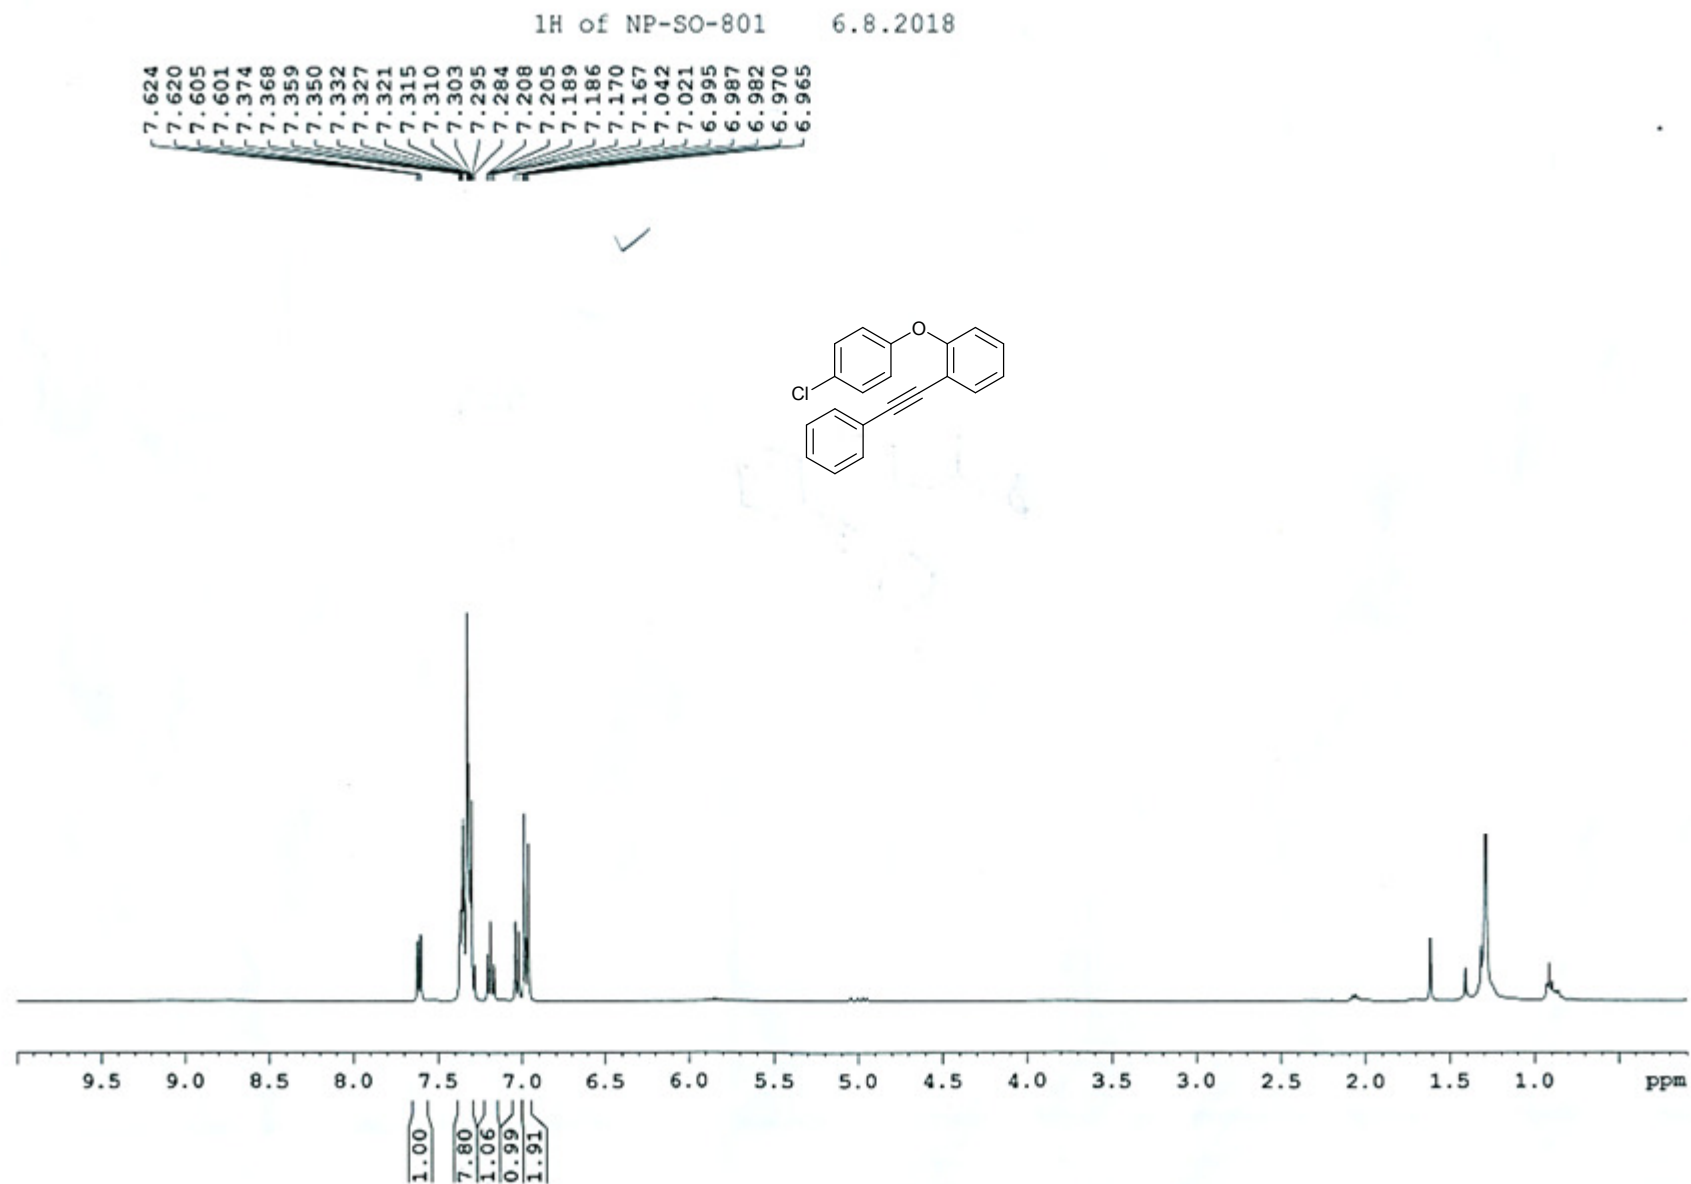

**<sup>13</sup>C NMR of 1-(4-Chlorophenoxy)-2-(2-phenylethynyl)benzene (2q)**

<sup>13</sup>C of NP-SO-801

6.8.2018

156.62  
156.28

133.79  
131.55  
129.85  
129.61  
128.41  
128.28  
127.85  
124.20  
123.00  
119.97  
119.16  
116.27

94.73

84.81

77.37

77.06

76.74

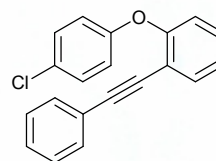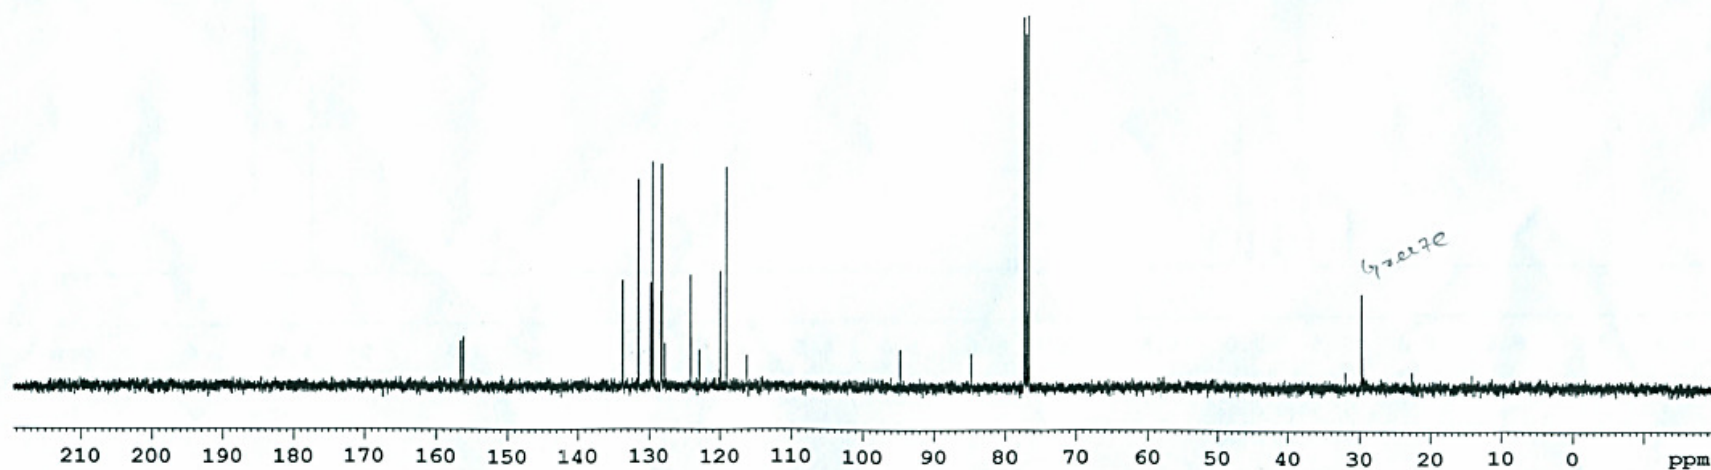

<sup>1</sup>H NMR of 1-(4-Methoxyphenoxy)-2-(2-phenylethynyl)benzene (2r)

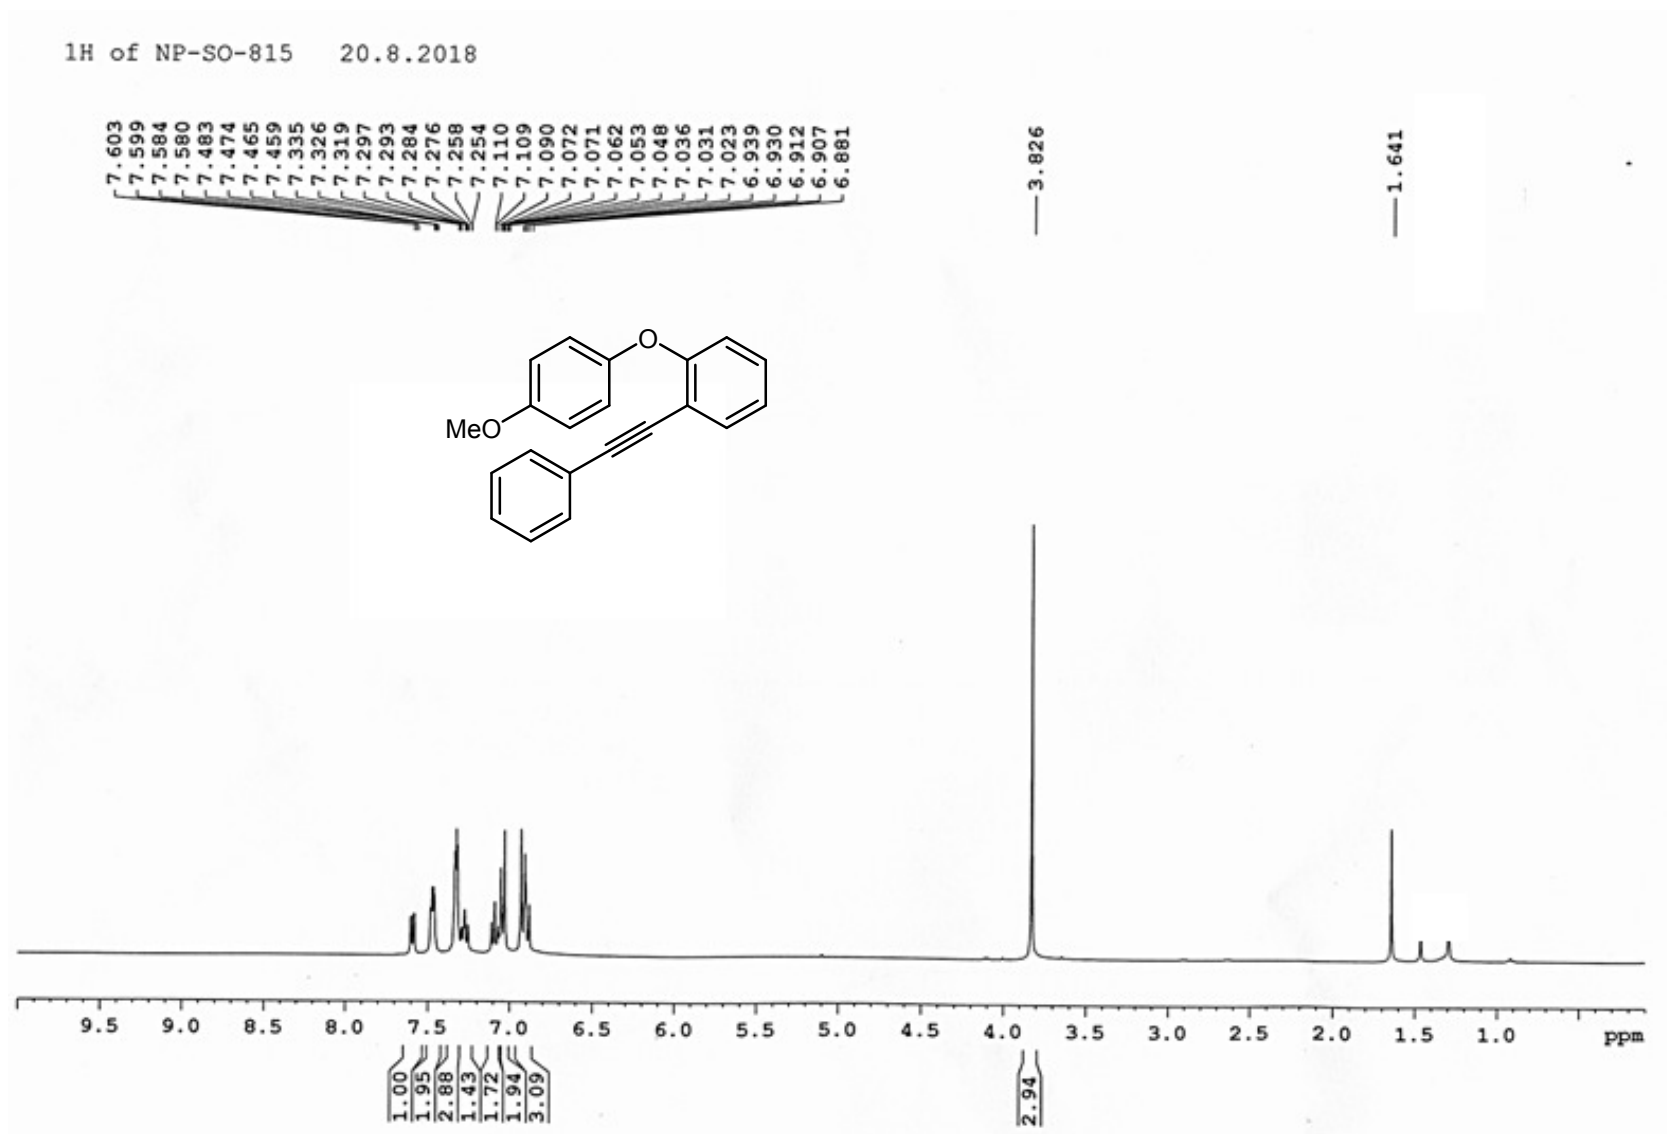

**<sup>13</sup>C NMR of 1-(4-Methoxyphenoxy)-2-(2-phenylethynyl)benzene (2r)**

<sup>13</sup>C of NP-SO-815 20.8.2018

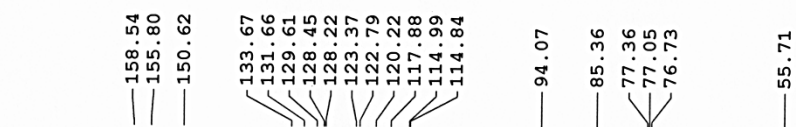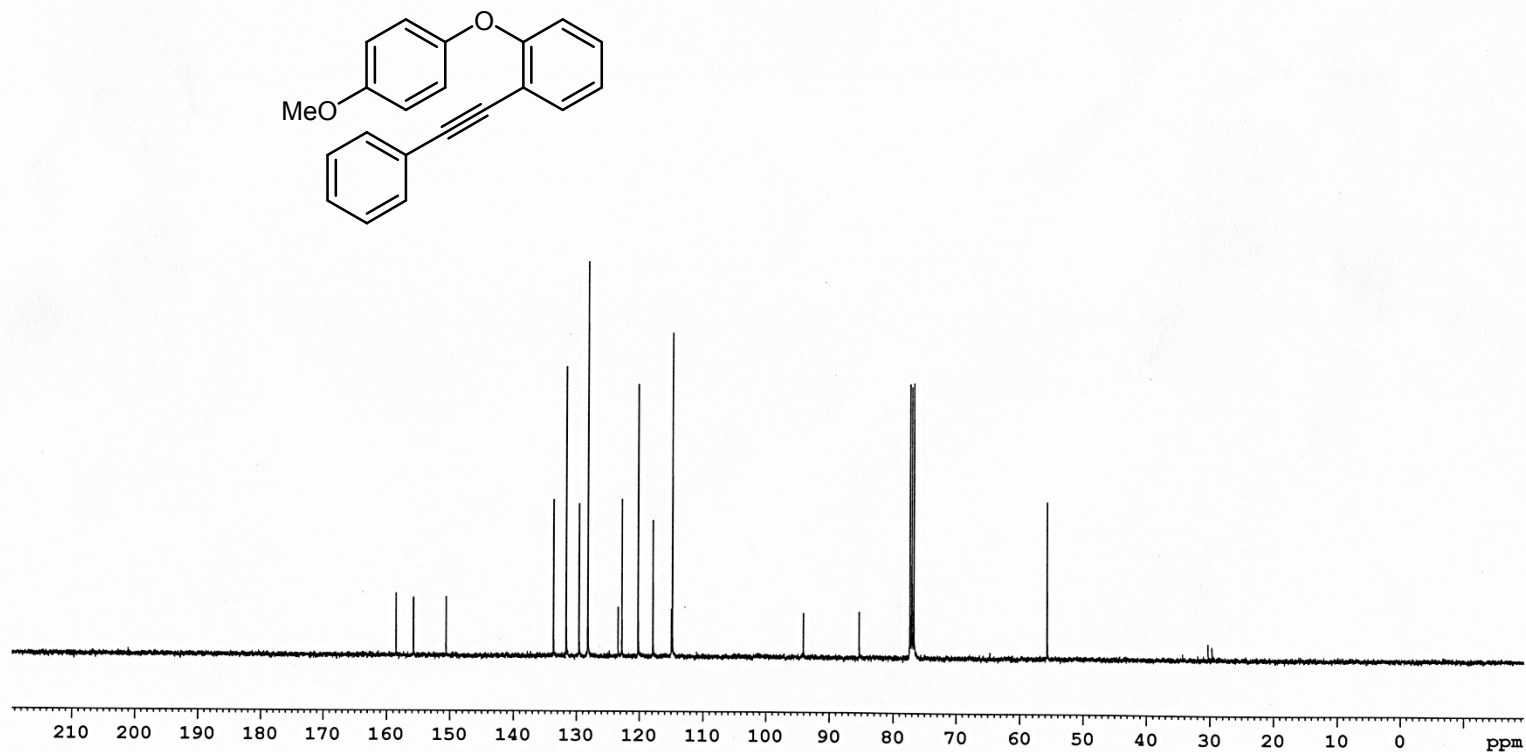



**<sup>1</sup>H NMR of 2-(2-(2-phenylethynyl)phenoxy)naphthalene (2s)**

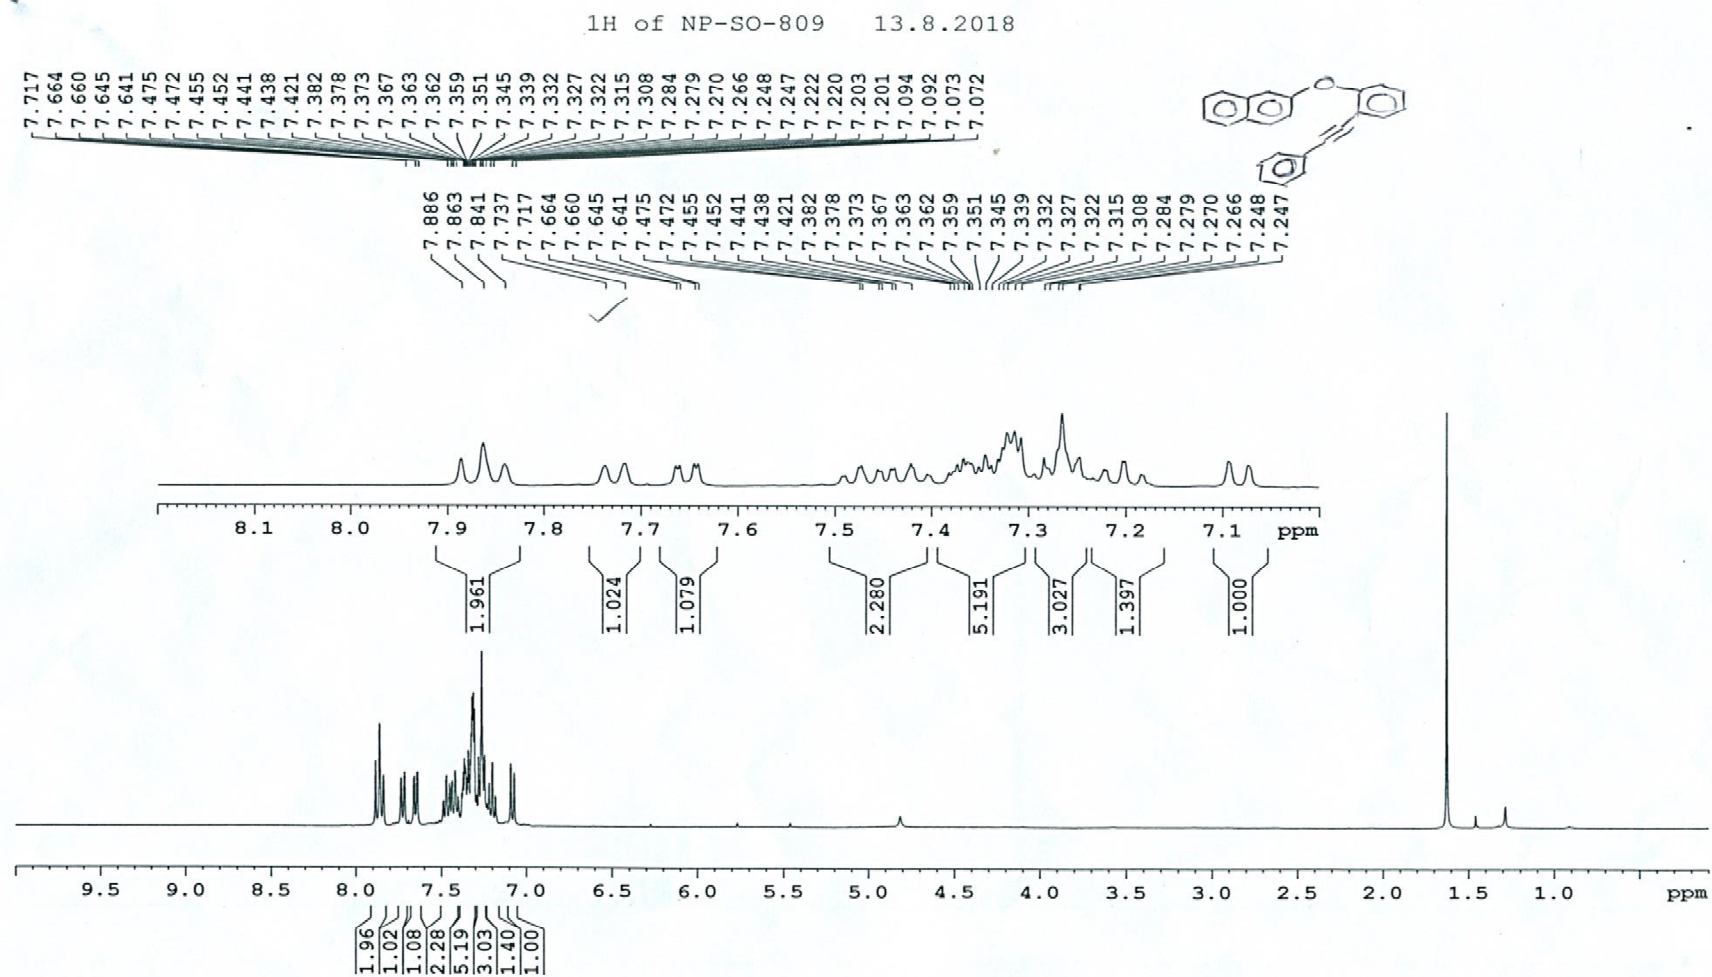

**$^{13}\text{C}$  NMR of 2-(2-(2-phenylethynyl)phenoxy)naphthalene (2s)**

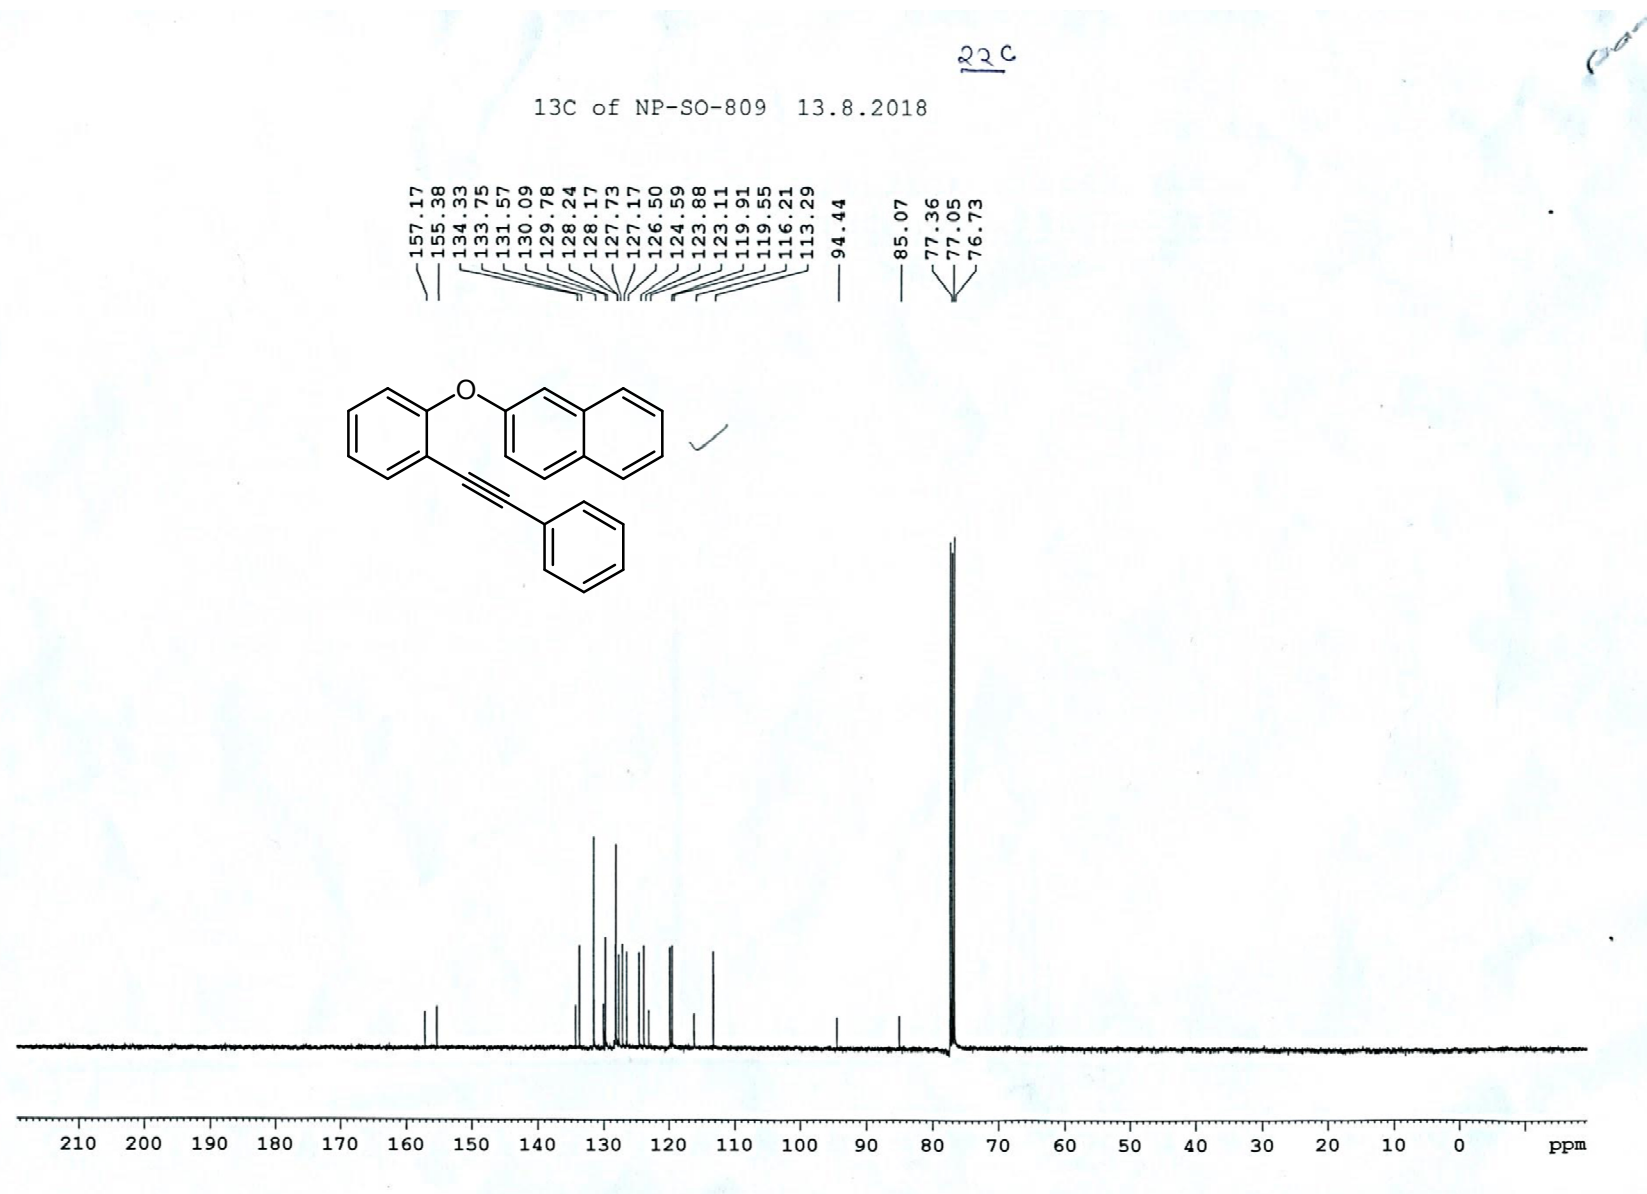

**<sup>1</sup>H NMR of 1-(2-(2-phenylethynyl)phenoxy)naphthalene (2t)**

<sup>1</sup>H of NP-SO-811 14.8.2018

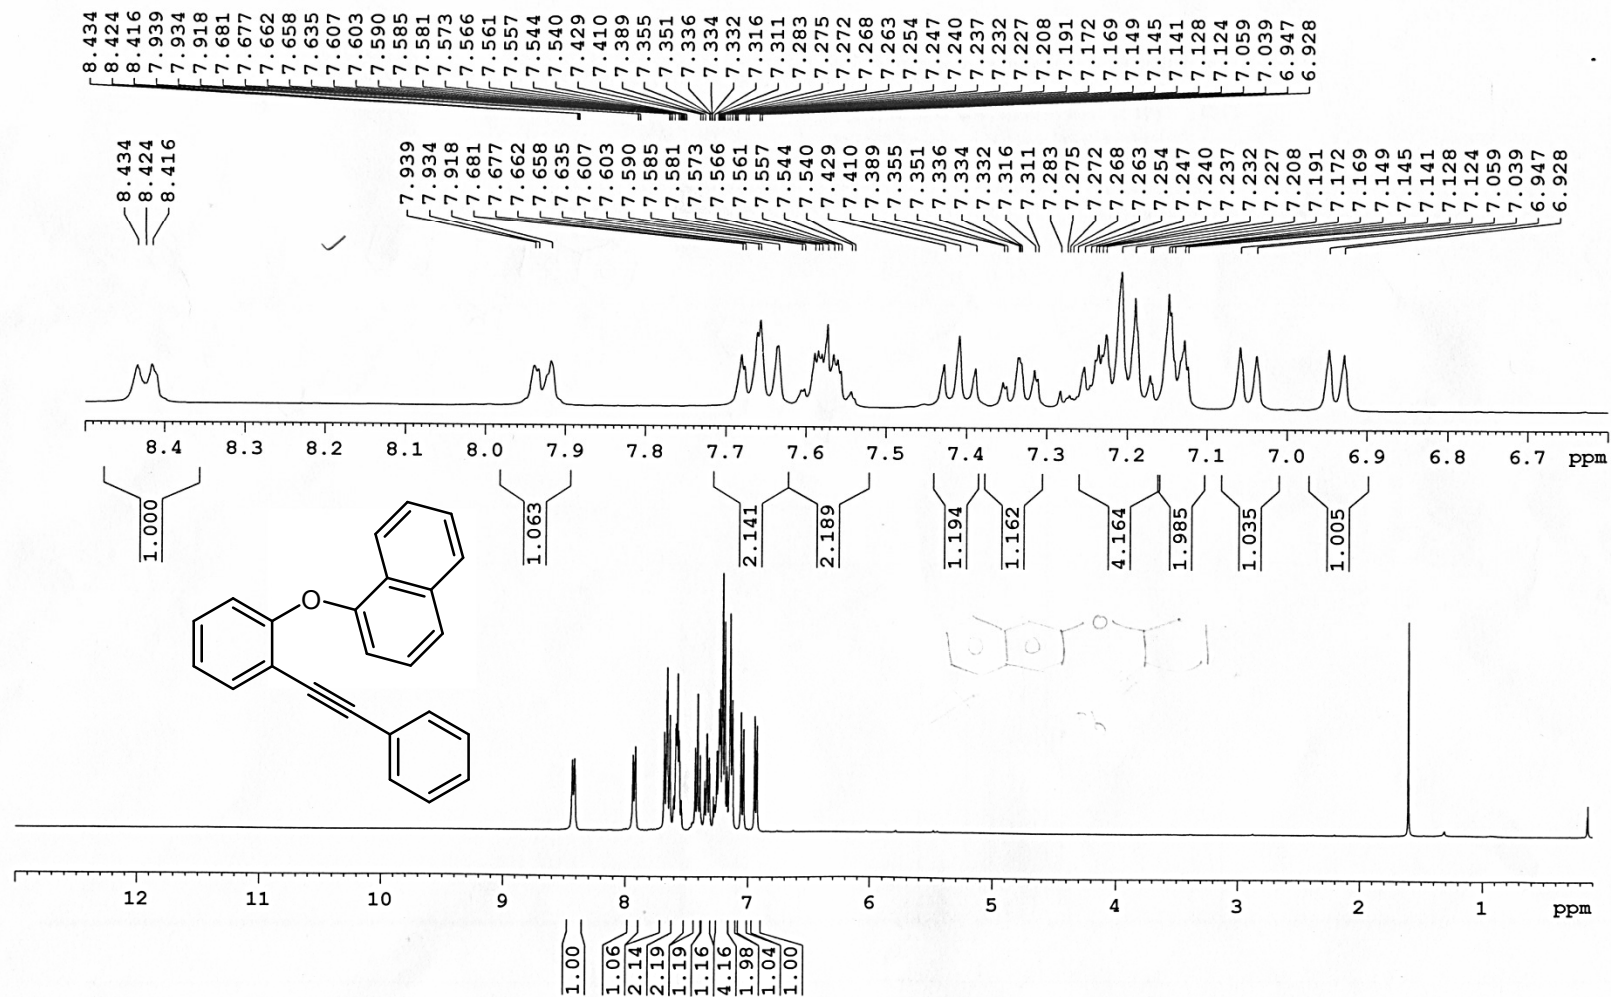

<sup>13</sup>C NMR of 1-(2-(2-phenylethynyl)phenoxy)naphthalene (2t)

<sup>13</sup>C of NP-SO-811 14.8.2018

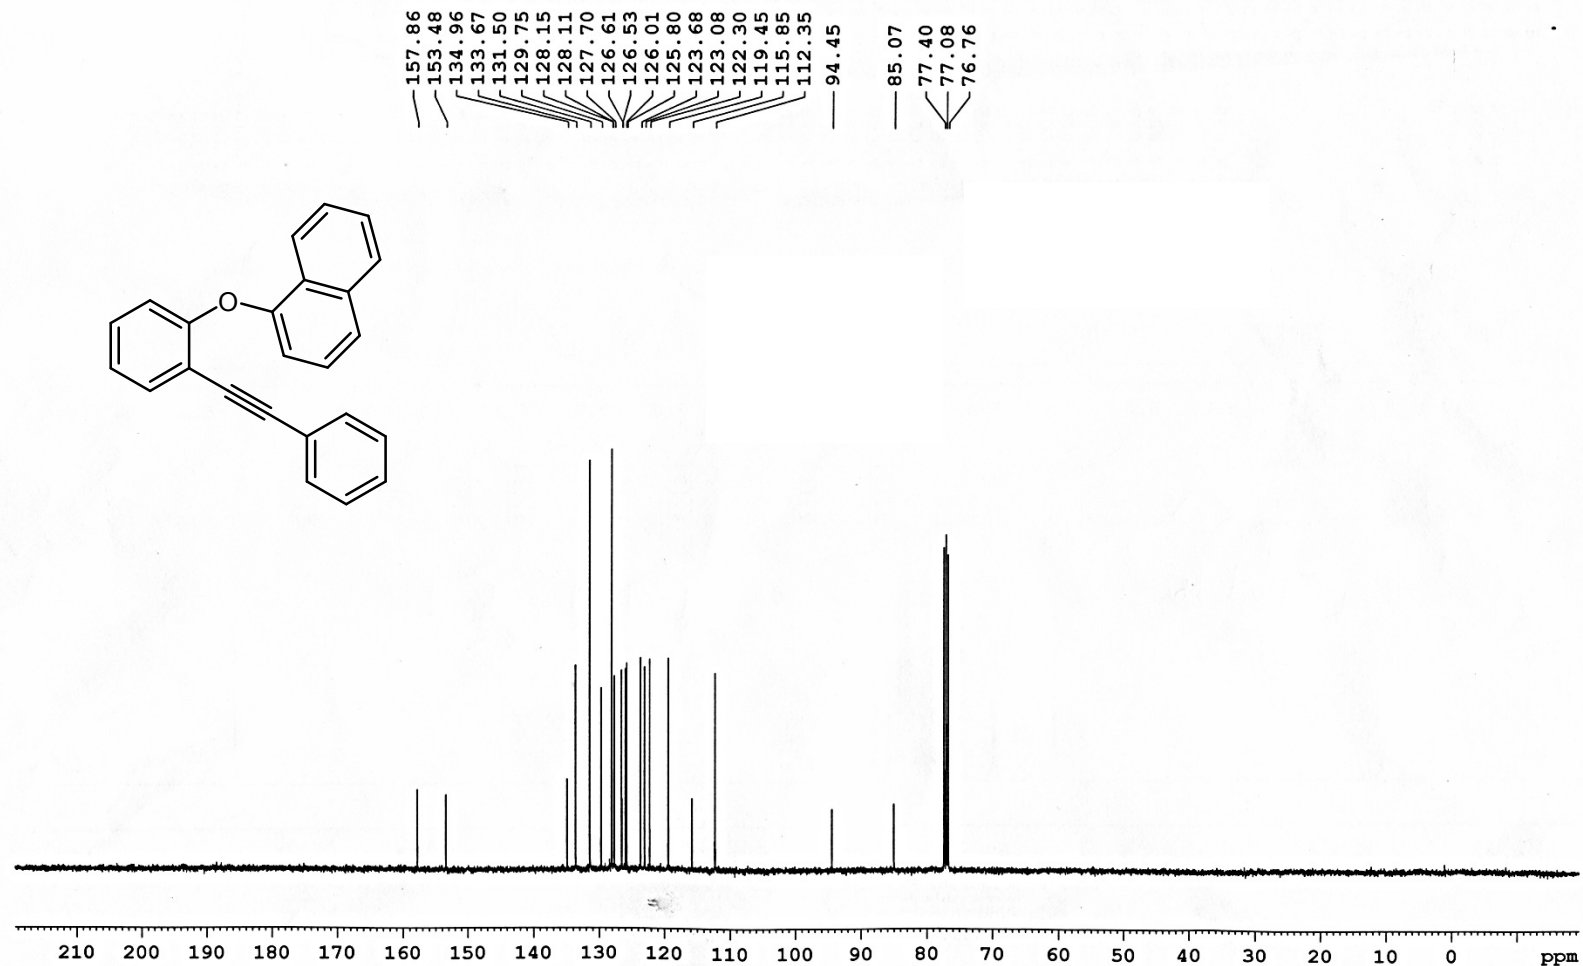

# <sup>1</sup>H NMR of 1-(10-phenyldibenzo[b,f]oxepin-2-yl)ethanone (3a)

10.4.2018

1H of NP-IM-P-COMe(676)

10.4.2018

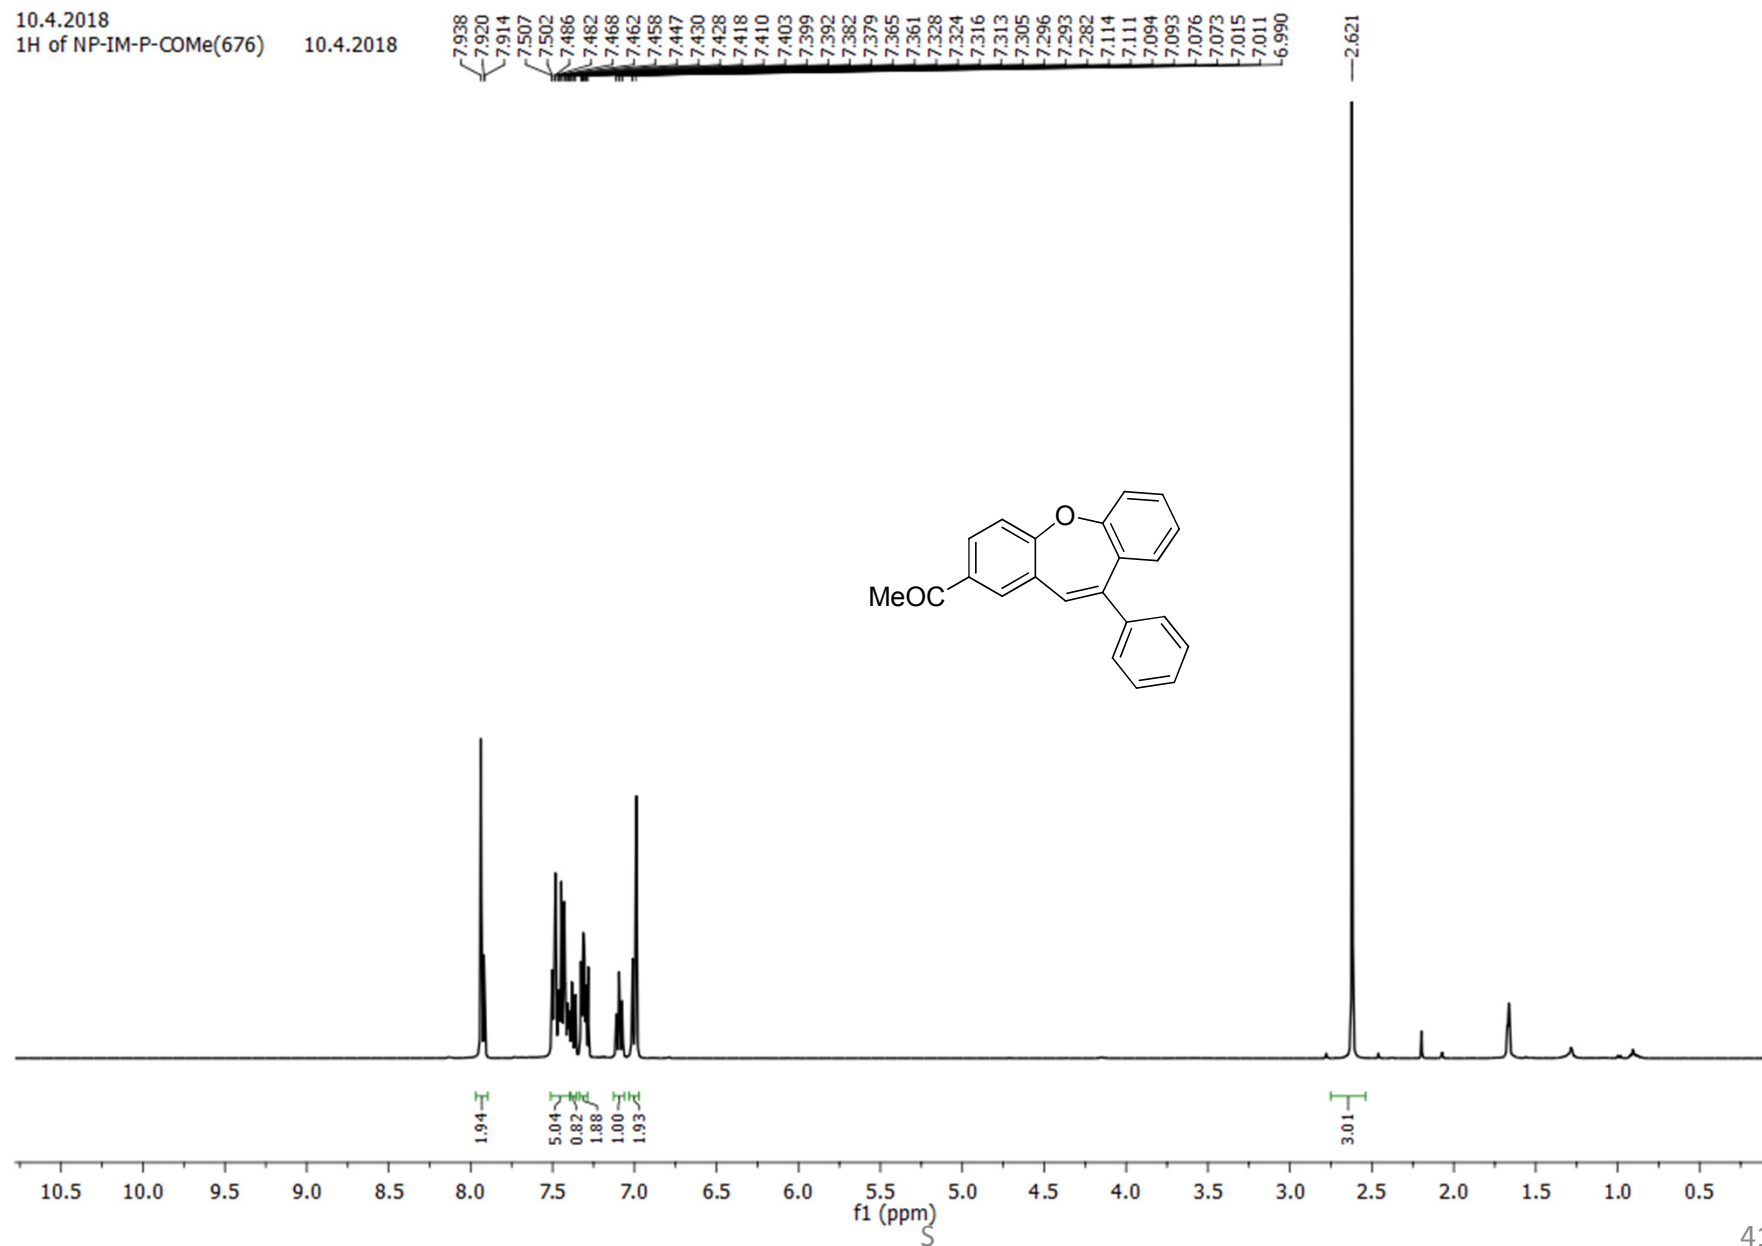

**$^{13}\text{C}$  NMR of 1-(10-phenyldibenzo[b,f]oxepin-2-yl)ethanone (3a)**

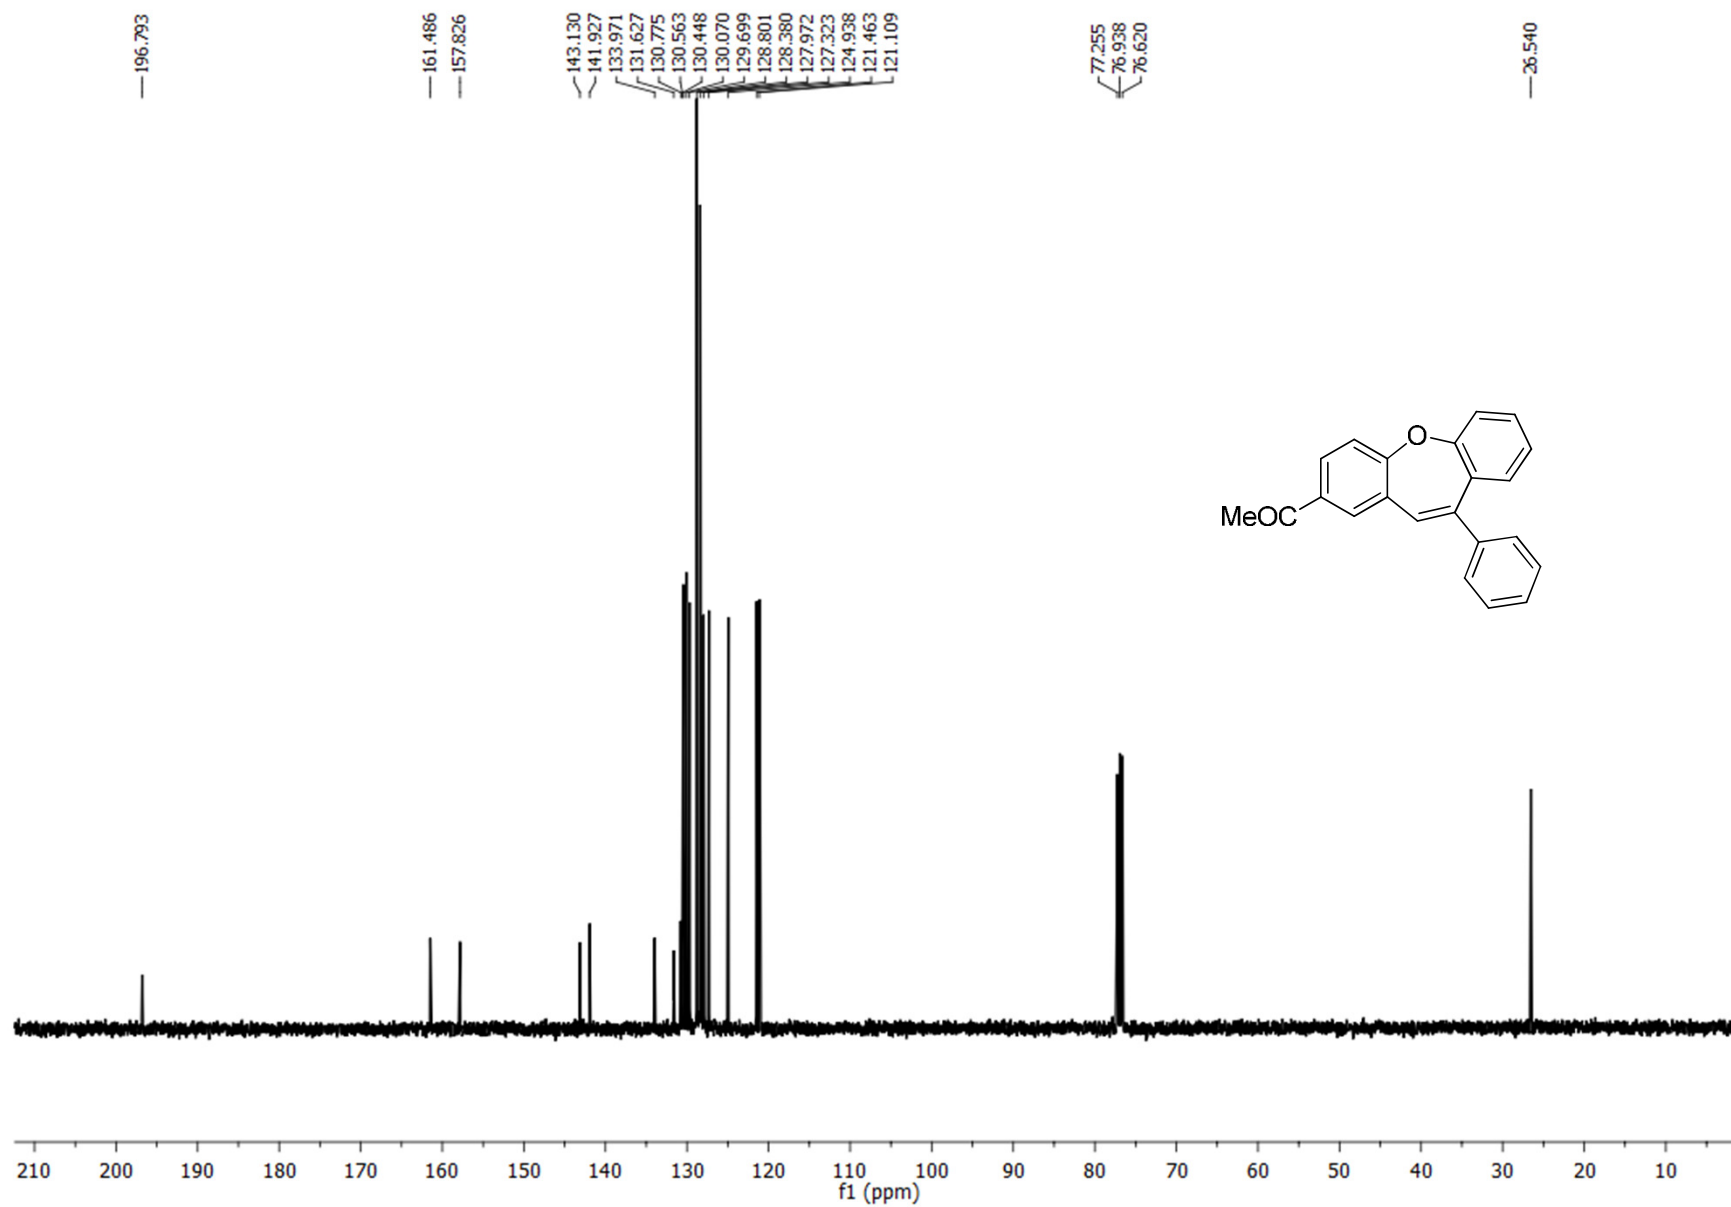

**<sup>1</sup>H NMR of 2-nitro-10-phenyldibenzo[b,f]oxepine (3b)**

5.6.2018

1H of NP-IM-676P-NO2 5.6.2018

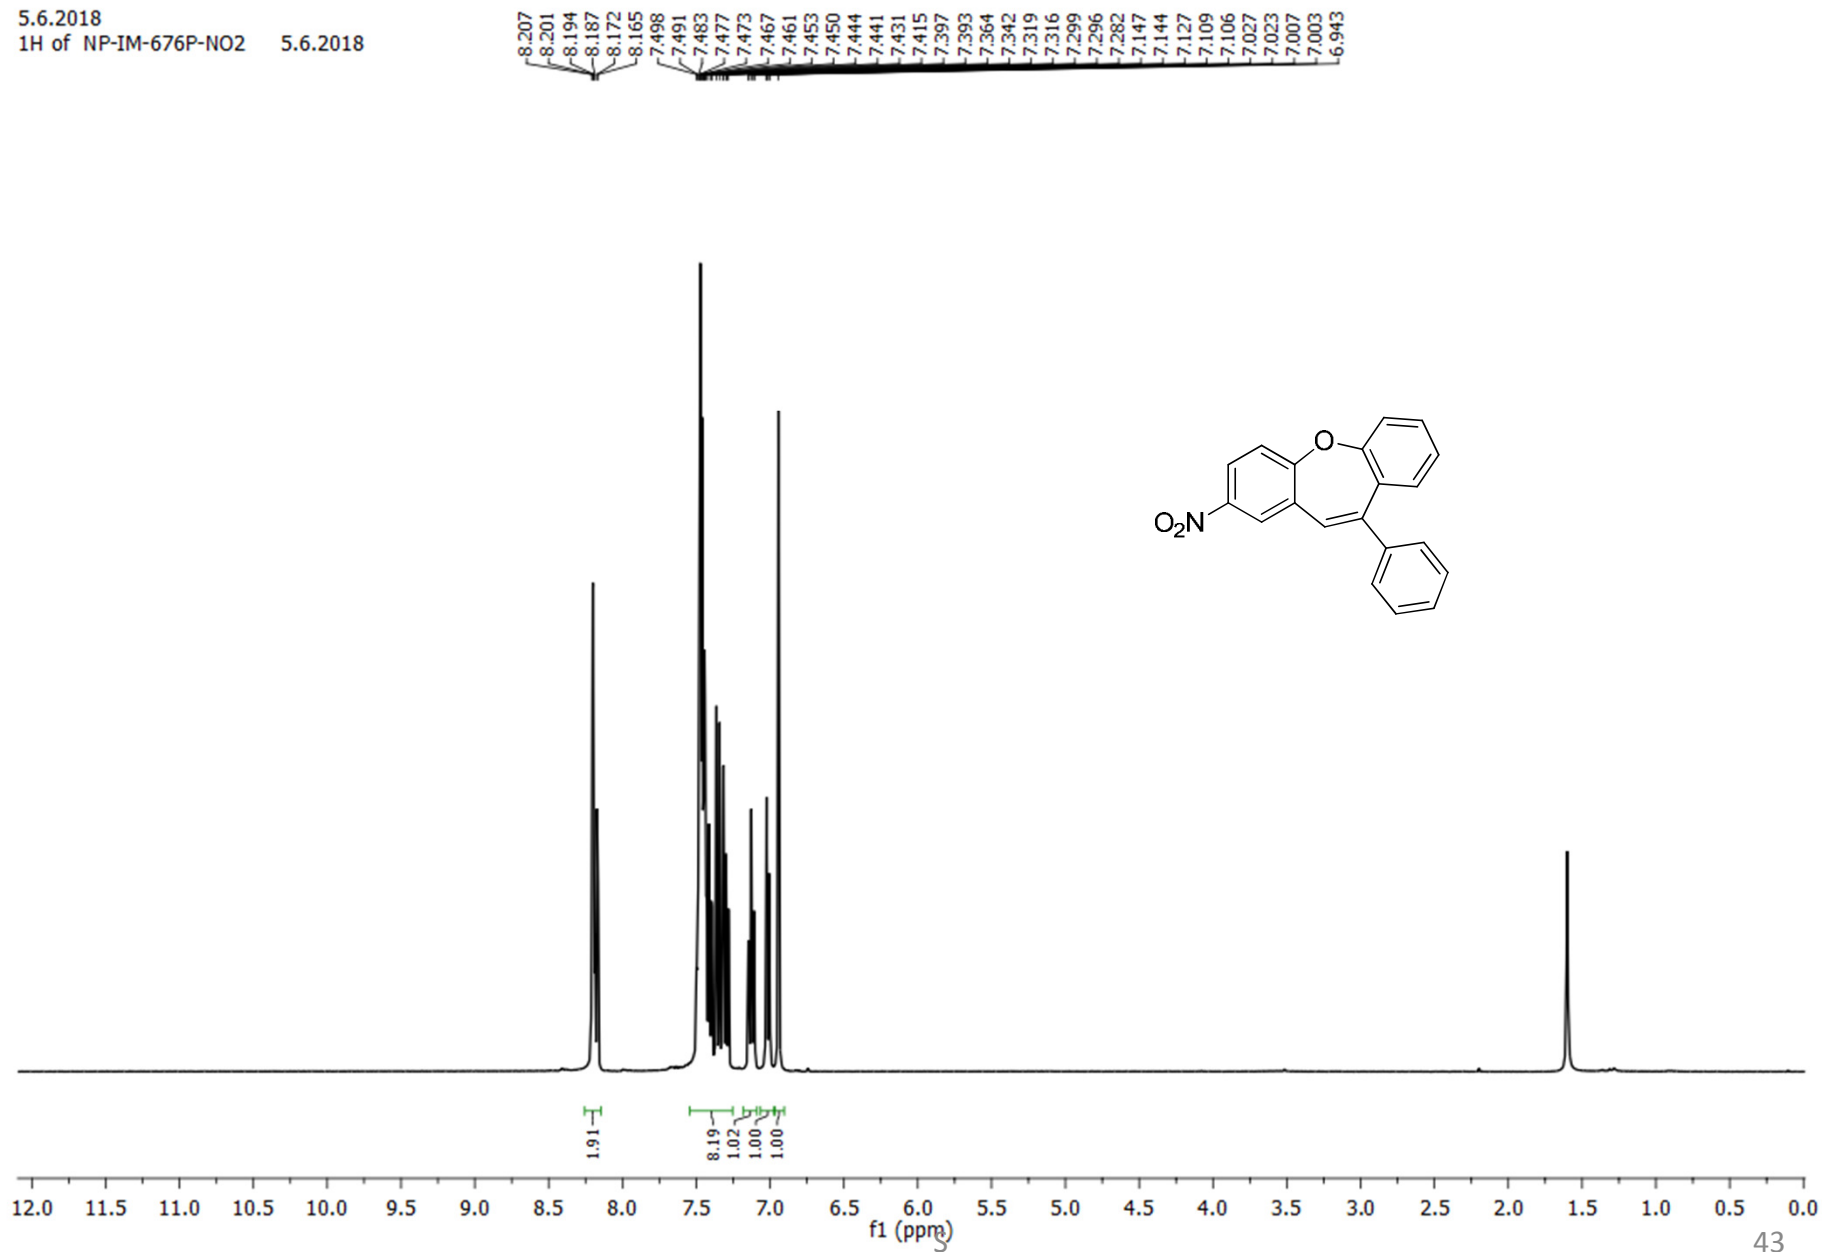

**$^{13}\text{C}$  NMR of 2-nitro-10-phenyldibenzo[b,f]oxepine (3b)**

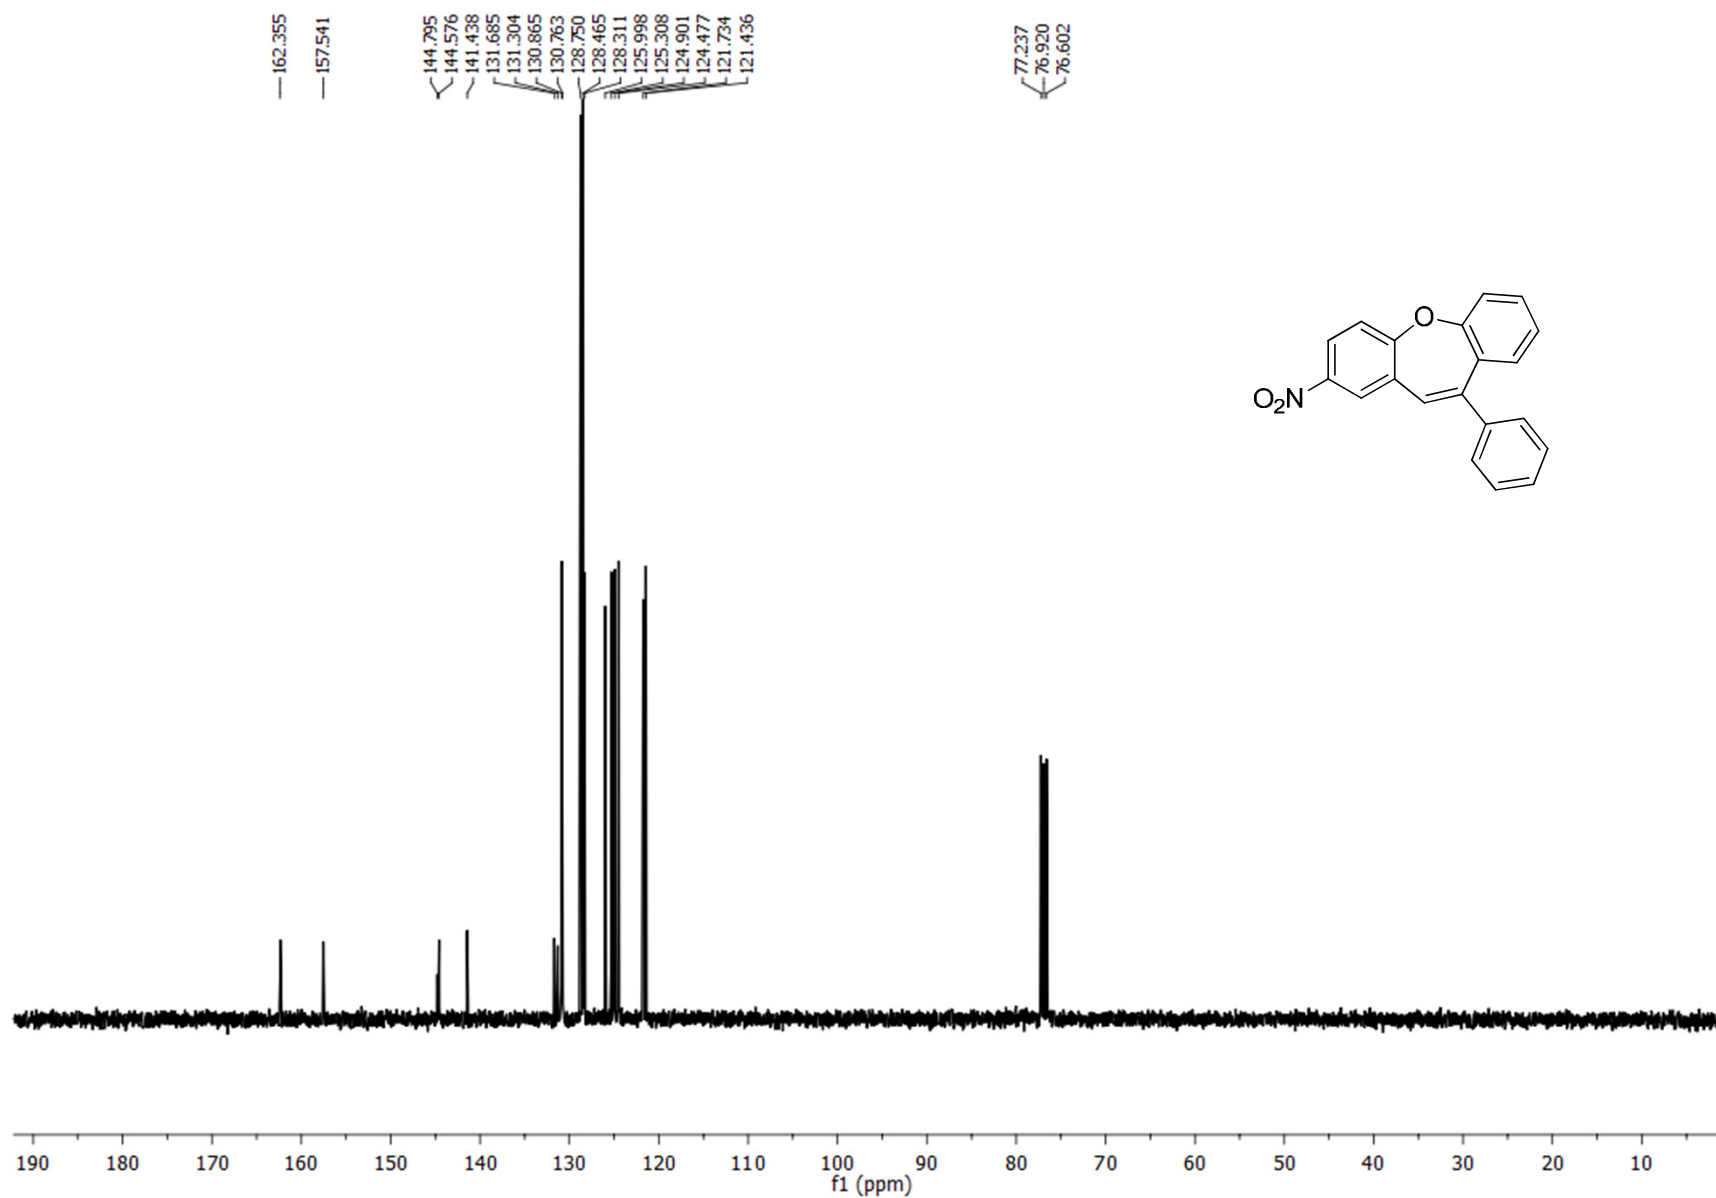



<sup>1</sup>H NMR of methyl 10-phenyldibenzo[b,f]oxepine-2-carboxylate (3c)

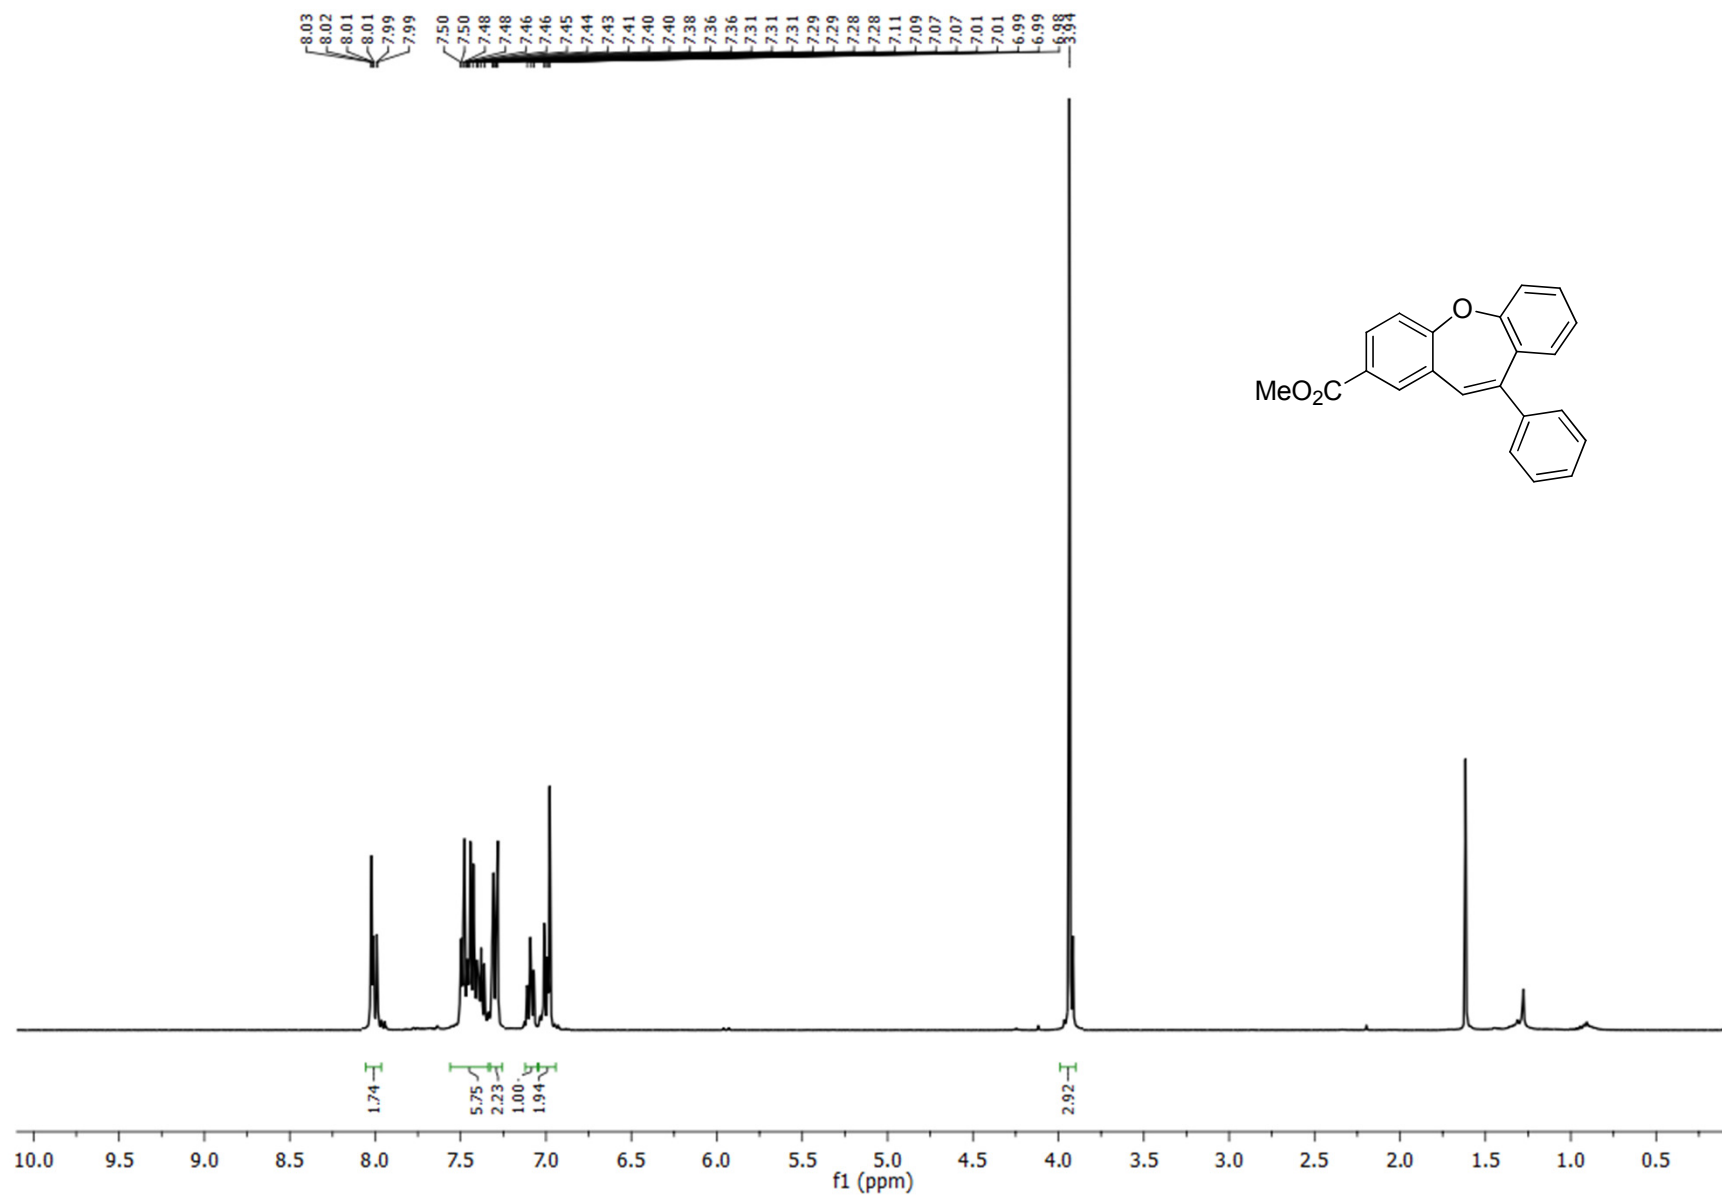

**$^{13}\text{C}$  NMR of methyl 10-phenyldibenzo[b,f]oxepine-2-carboxylate (3c)**

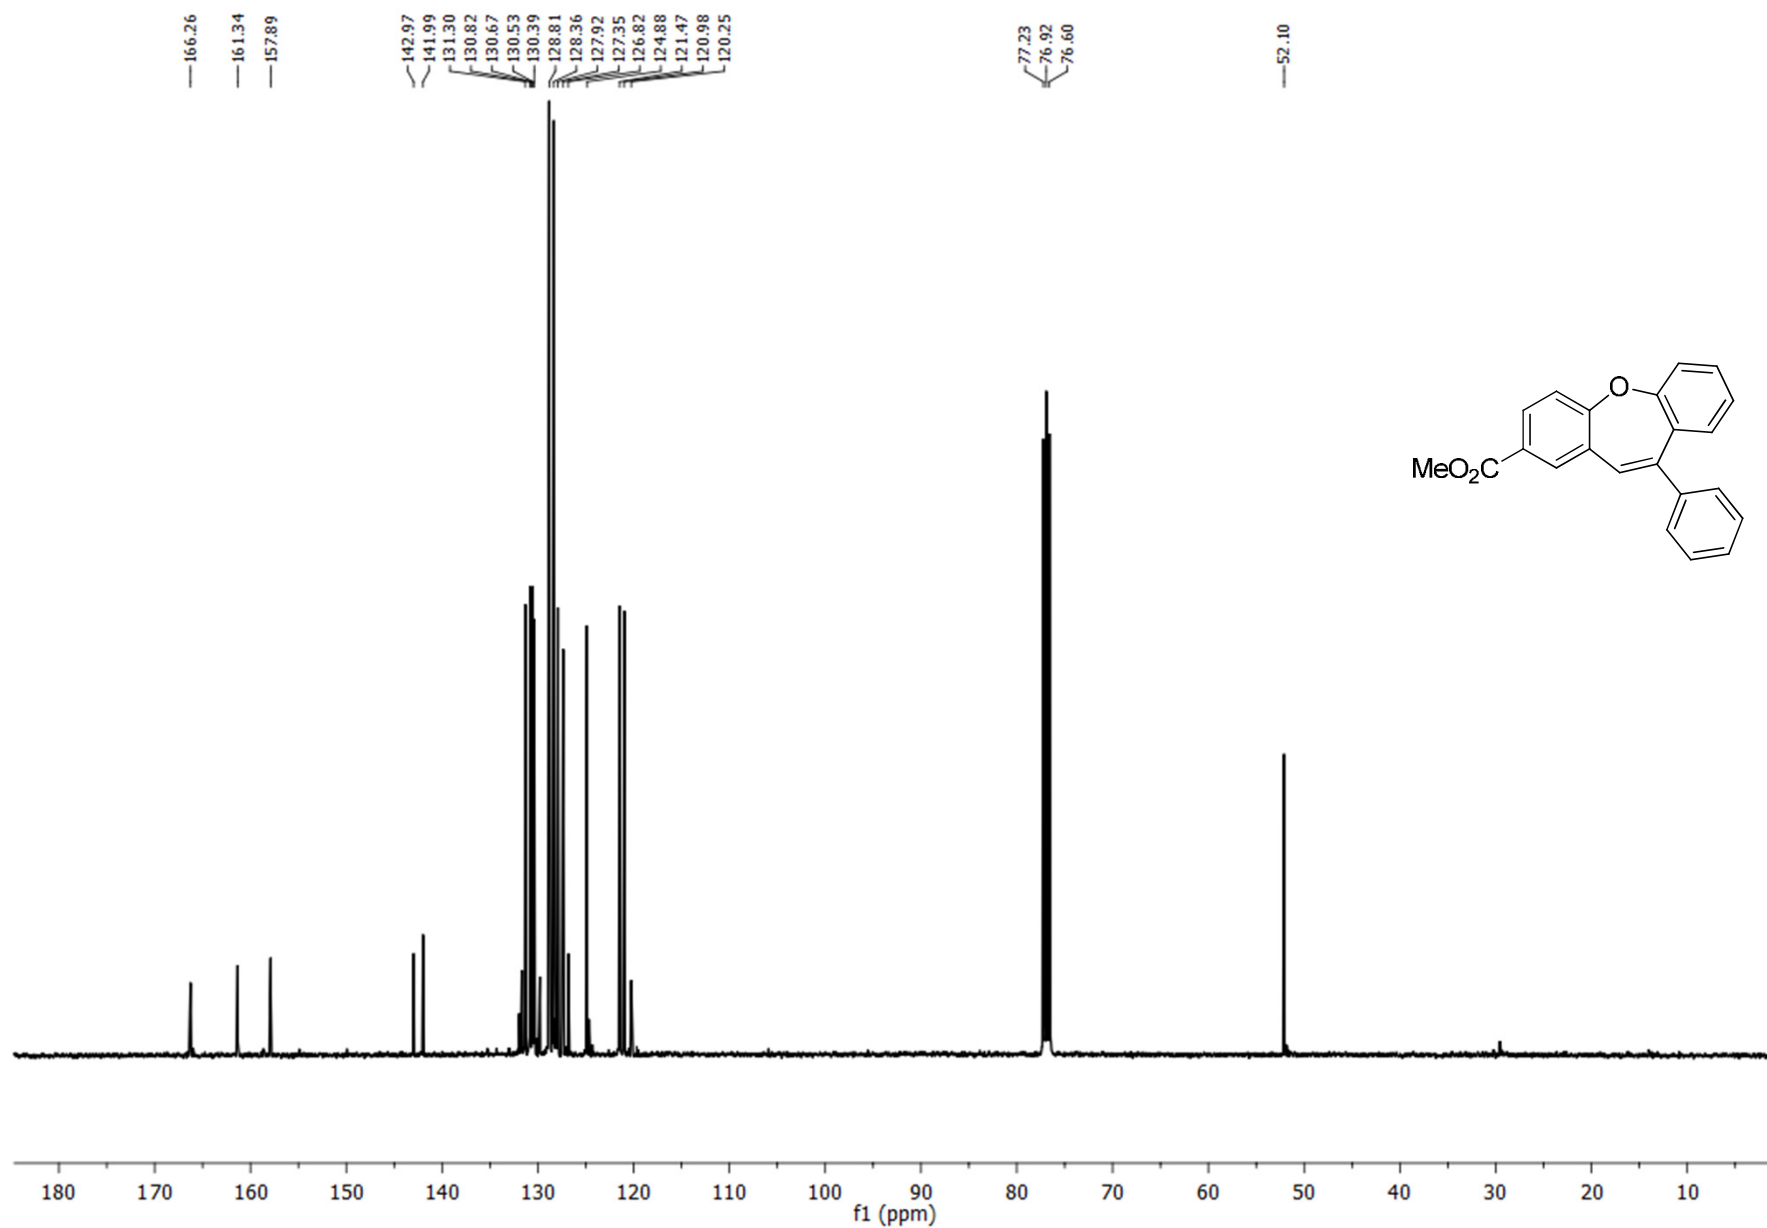

<sup>1</sup>H NMR of ethyl 10-phenyldibenzo[b,f]oxepine-2-carboxylate (3d)

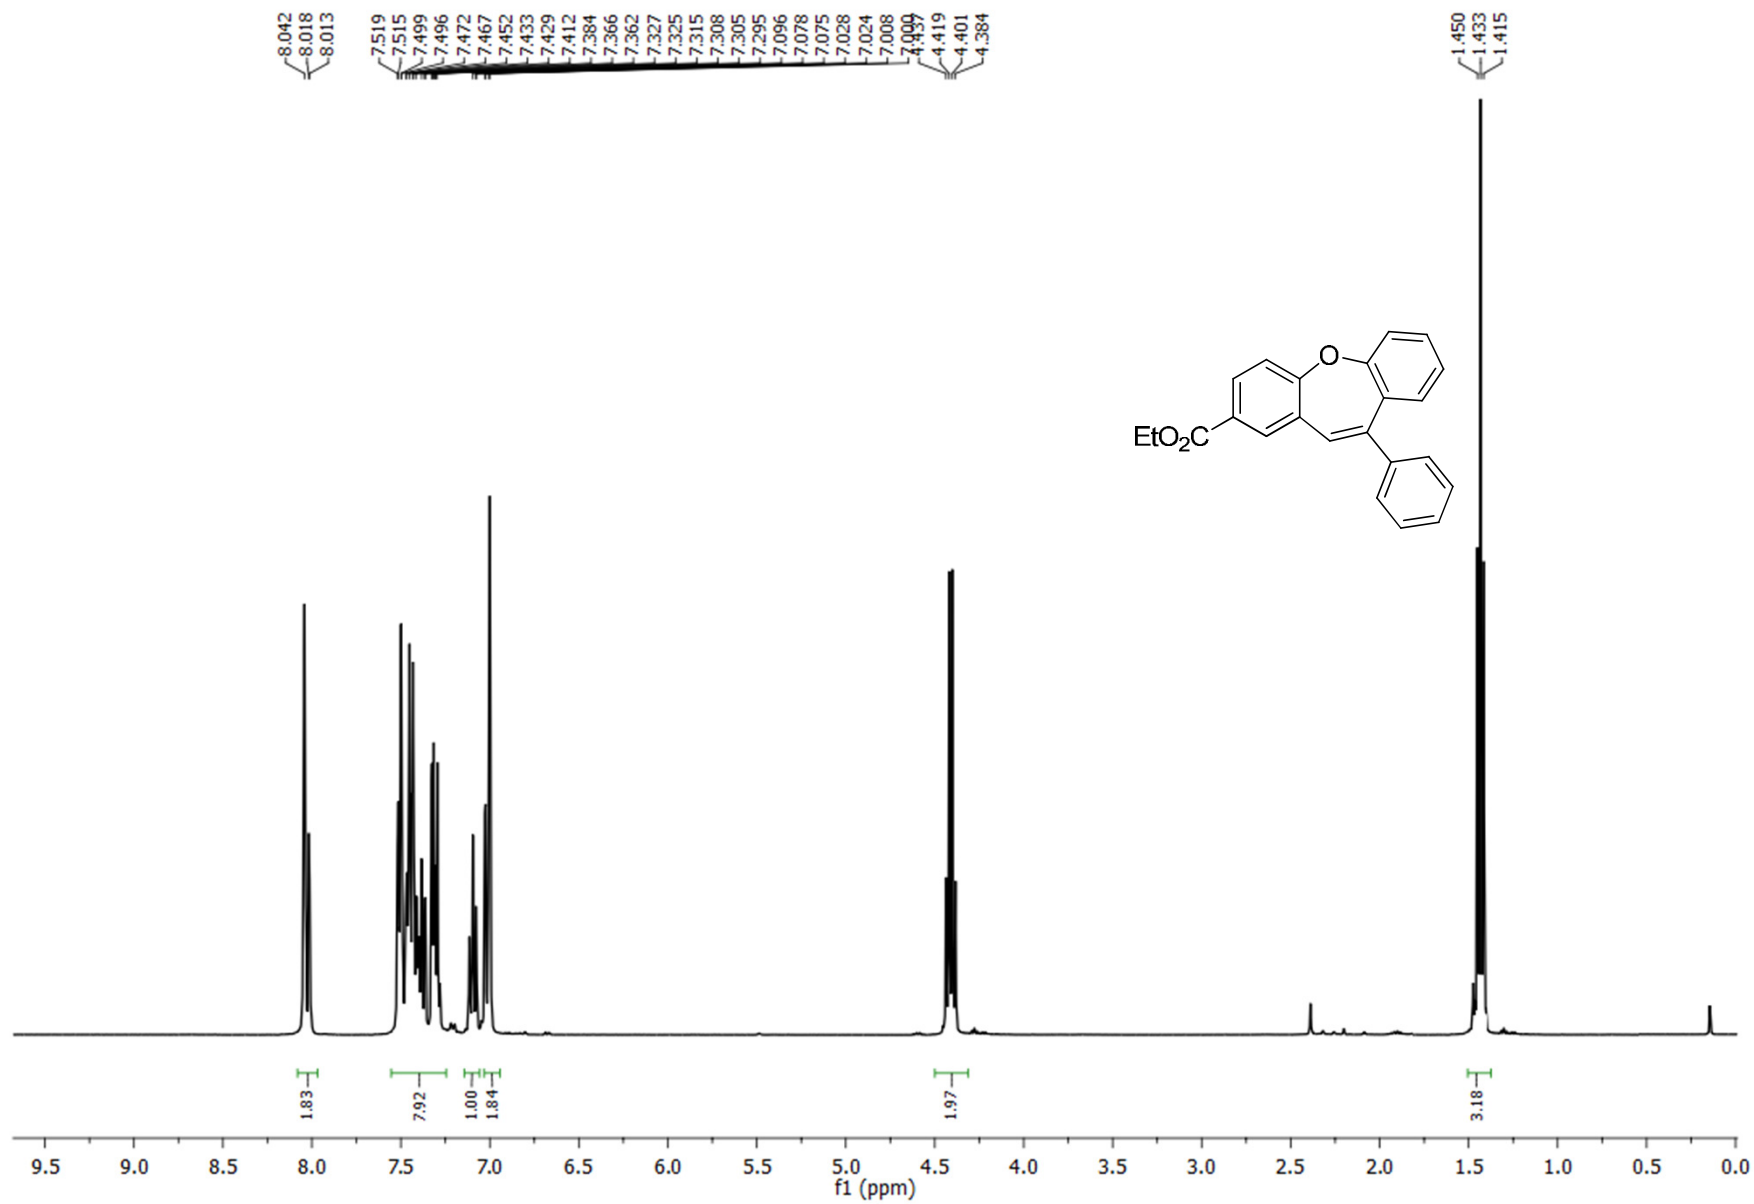

**<sup>13</sup>C NMR of ethyl 10-phenyldibenzo[b,f]oxepine-2-carboxylate (3d)**

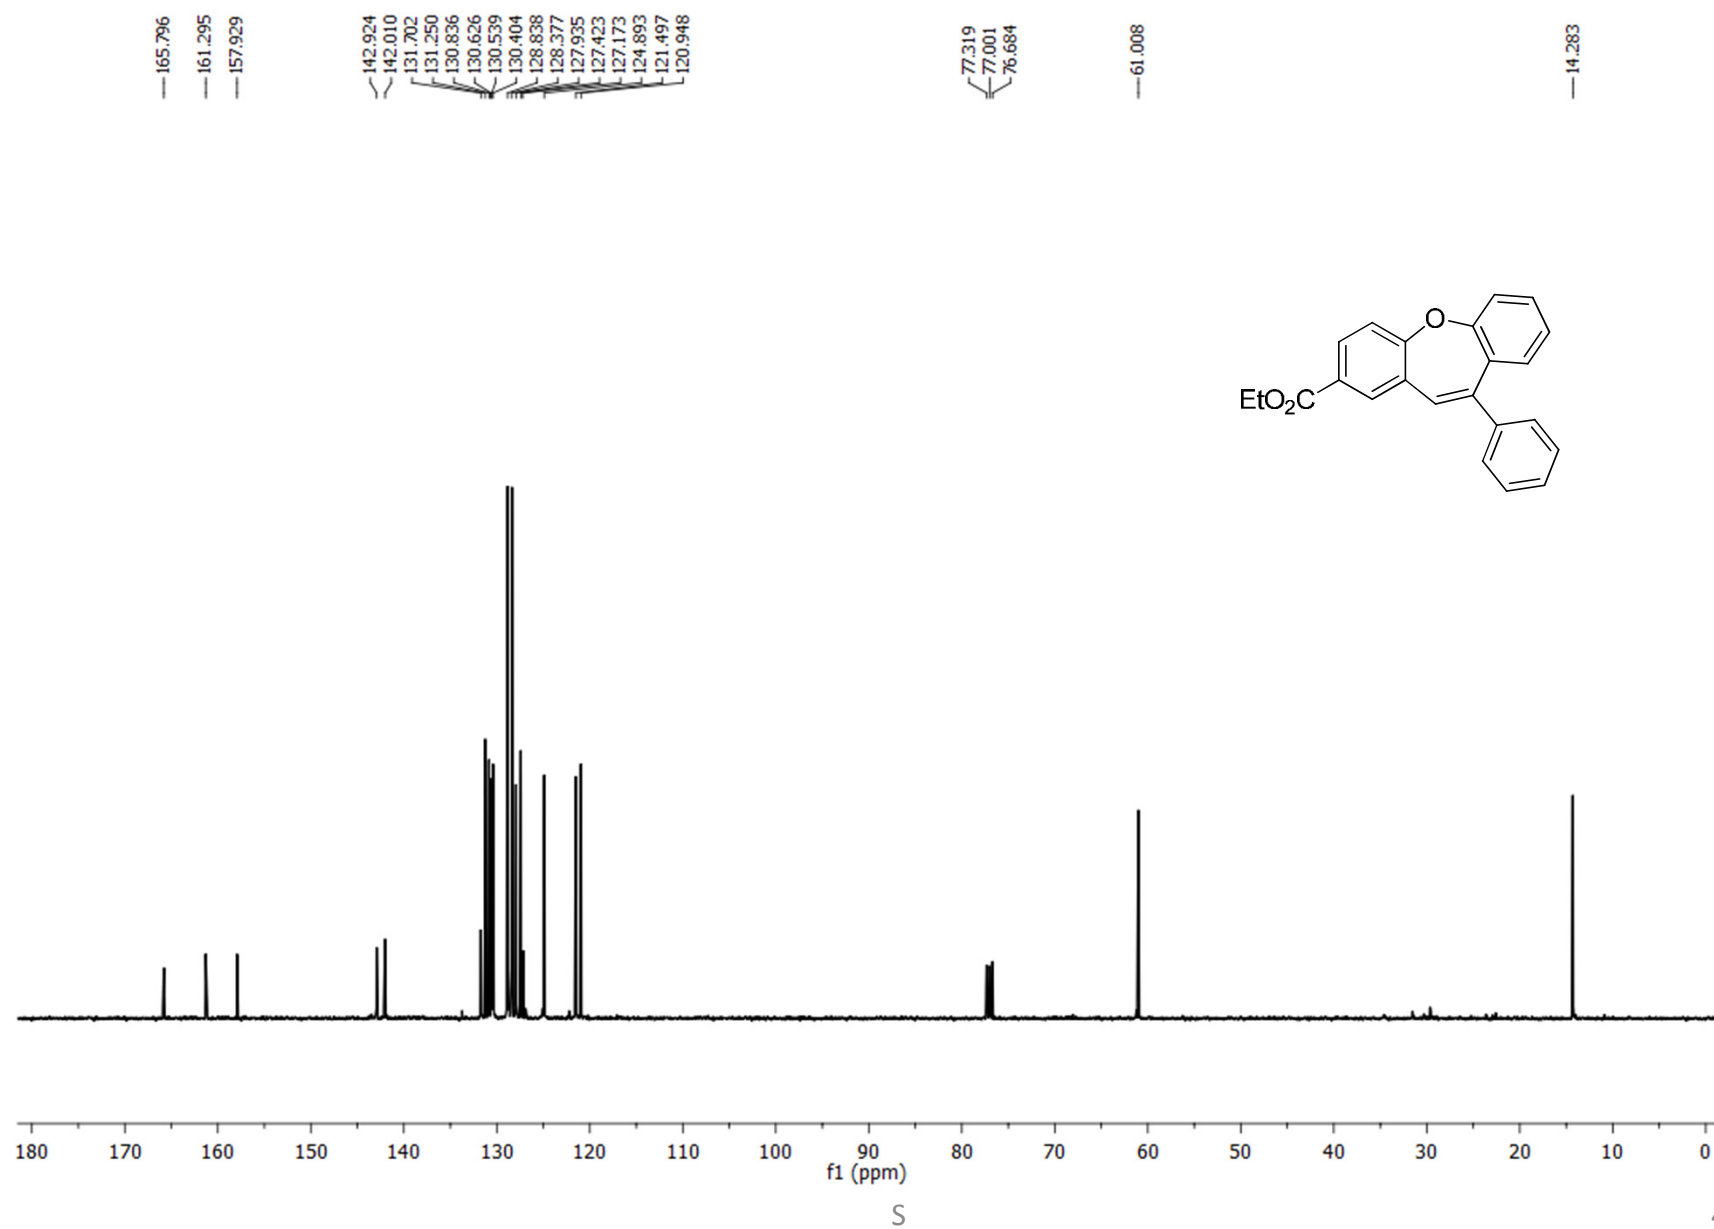

<sup>1</sup>H NMR of isopropyl 10-phenyldibenzo[b,f]oxepine-2-carboxylate (3e)

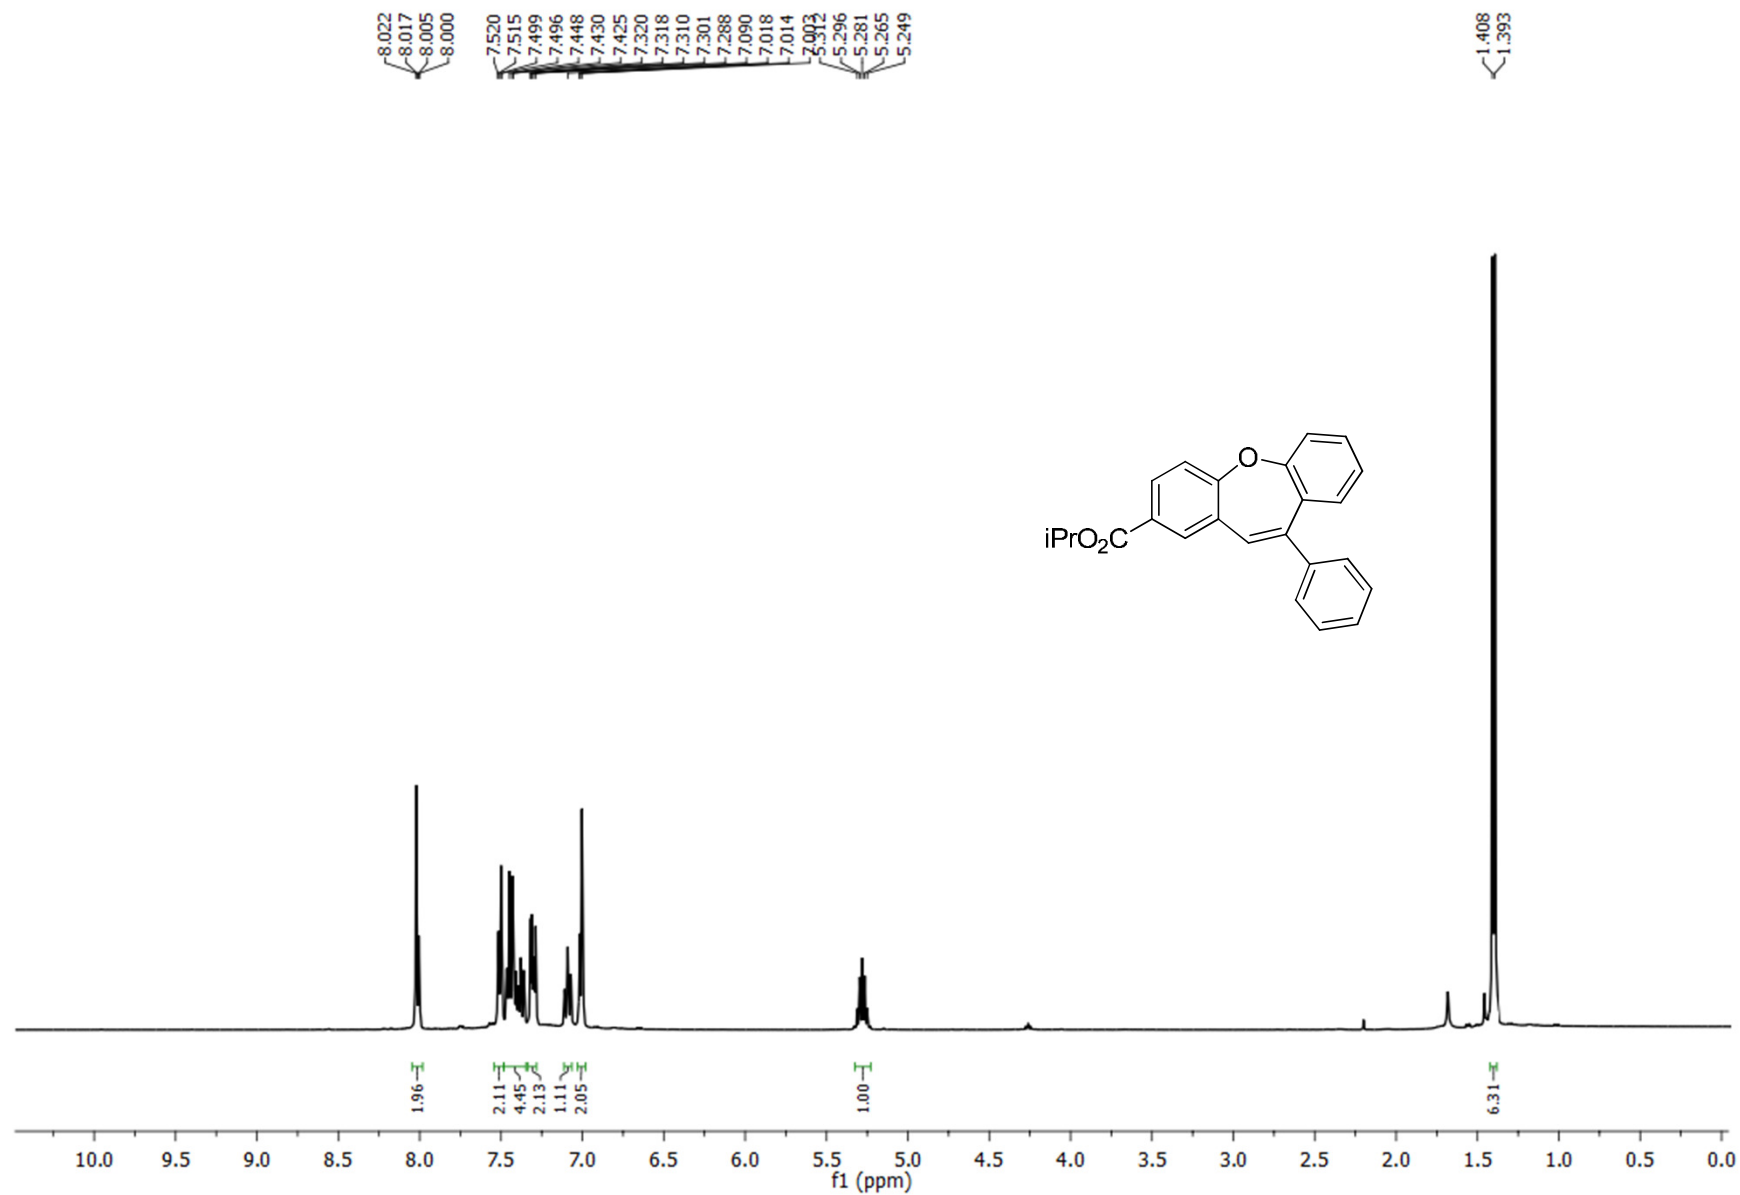

**$^{13}\text{C}$  NMR of isopropyl 10-phenyldibenzo[b,f]oxepine-2-carboxylate (3e)**

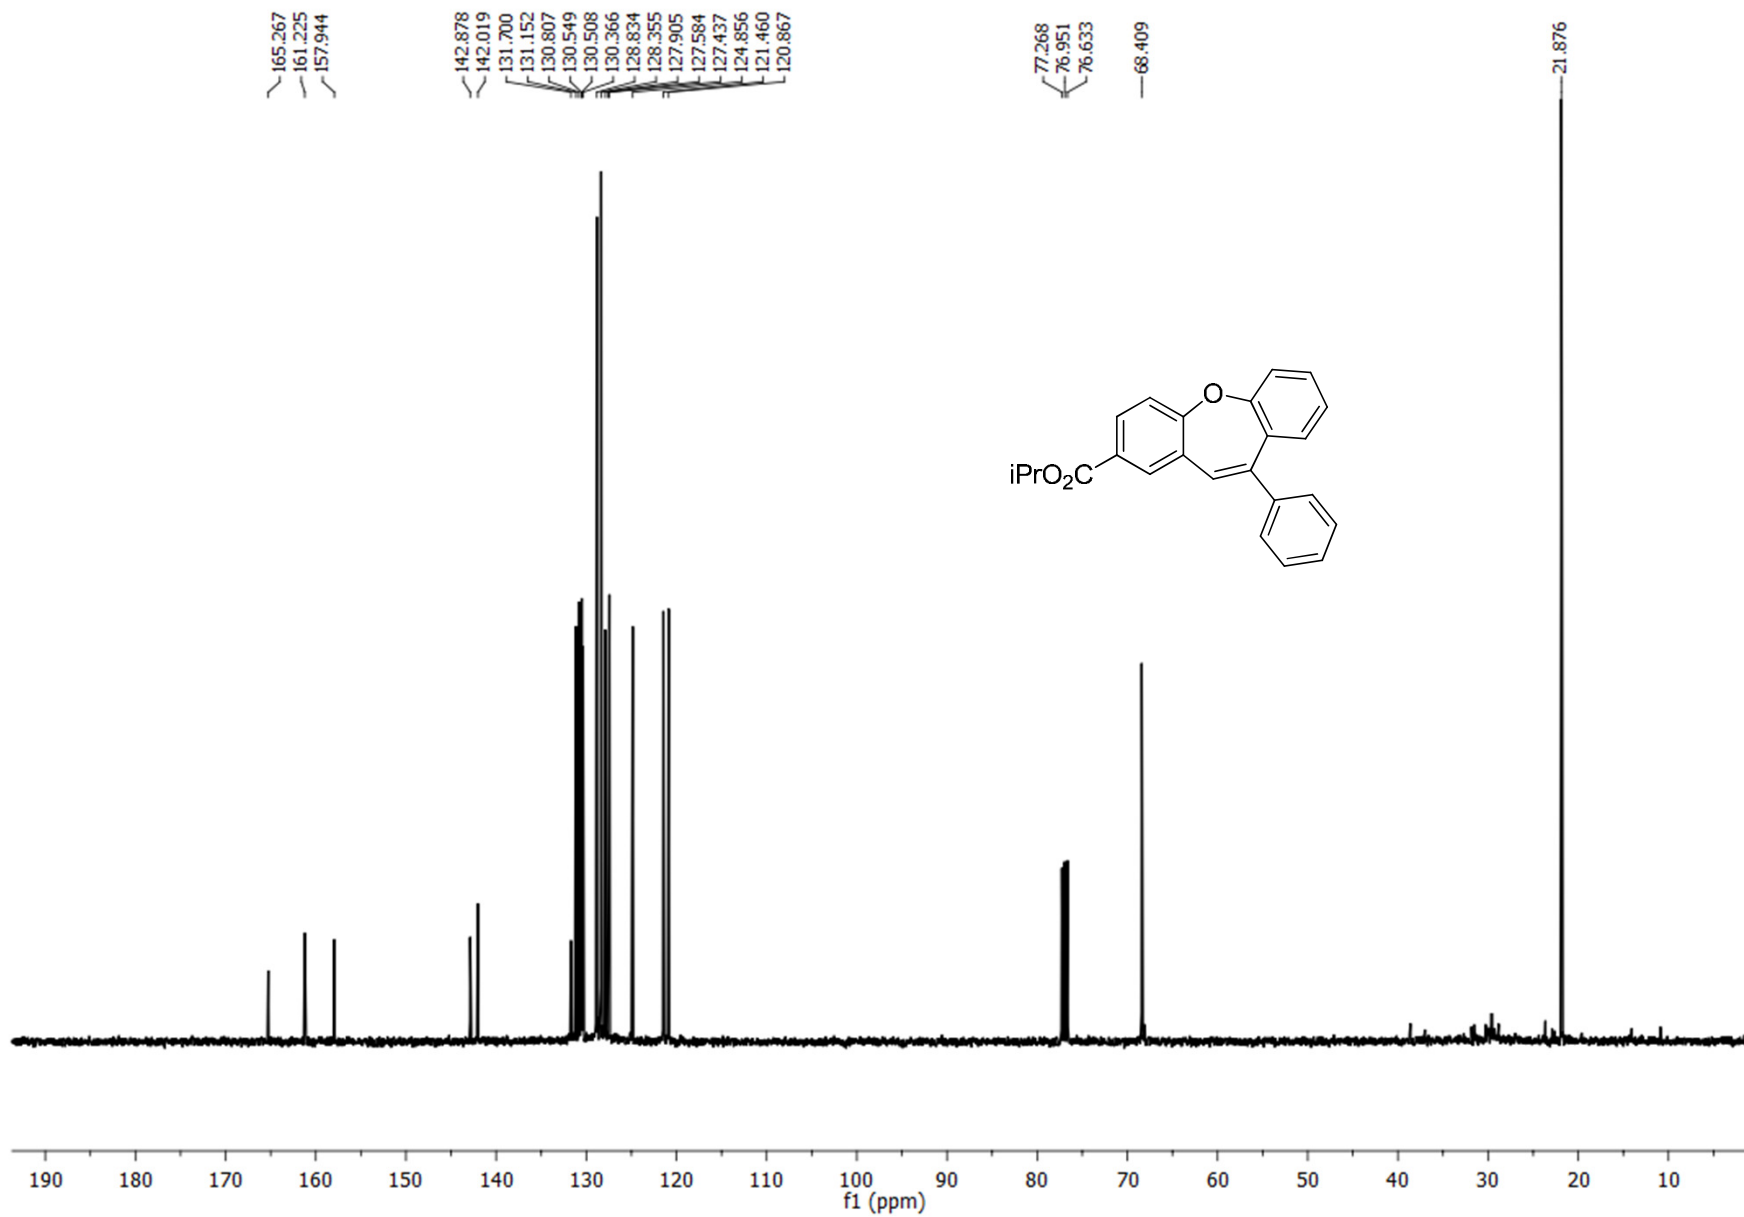

**<sup>1</sup>H NMR of 10-phenyldibenzo[b,f]oxepine-2-carbonitrile (3f)**

5.6.2018

1H of NP-IM-676P-CN 5.6.2018

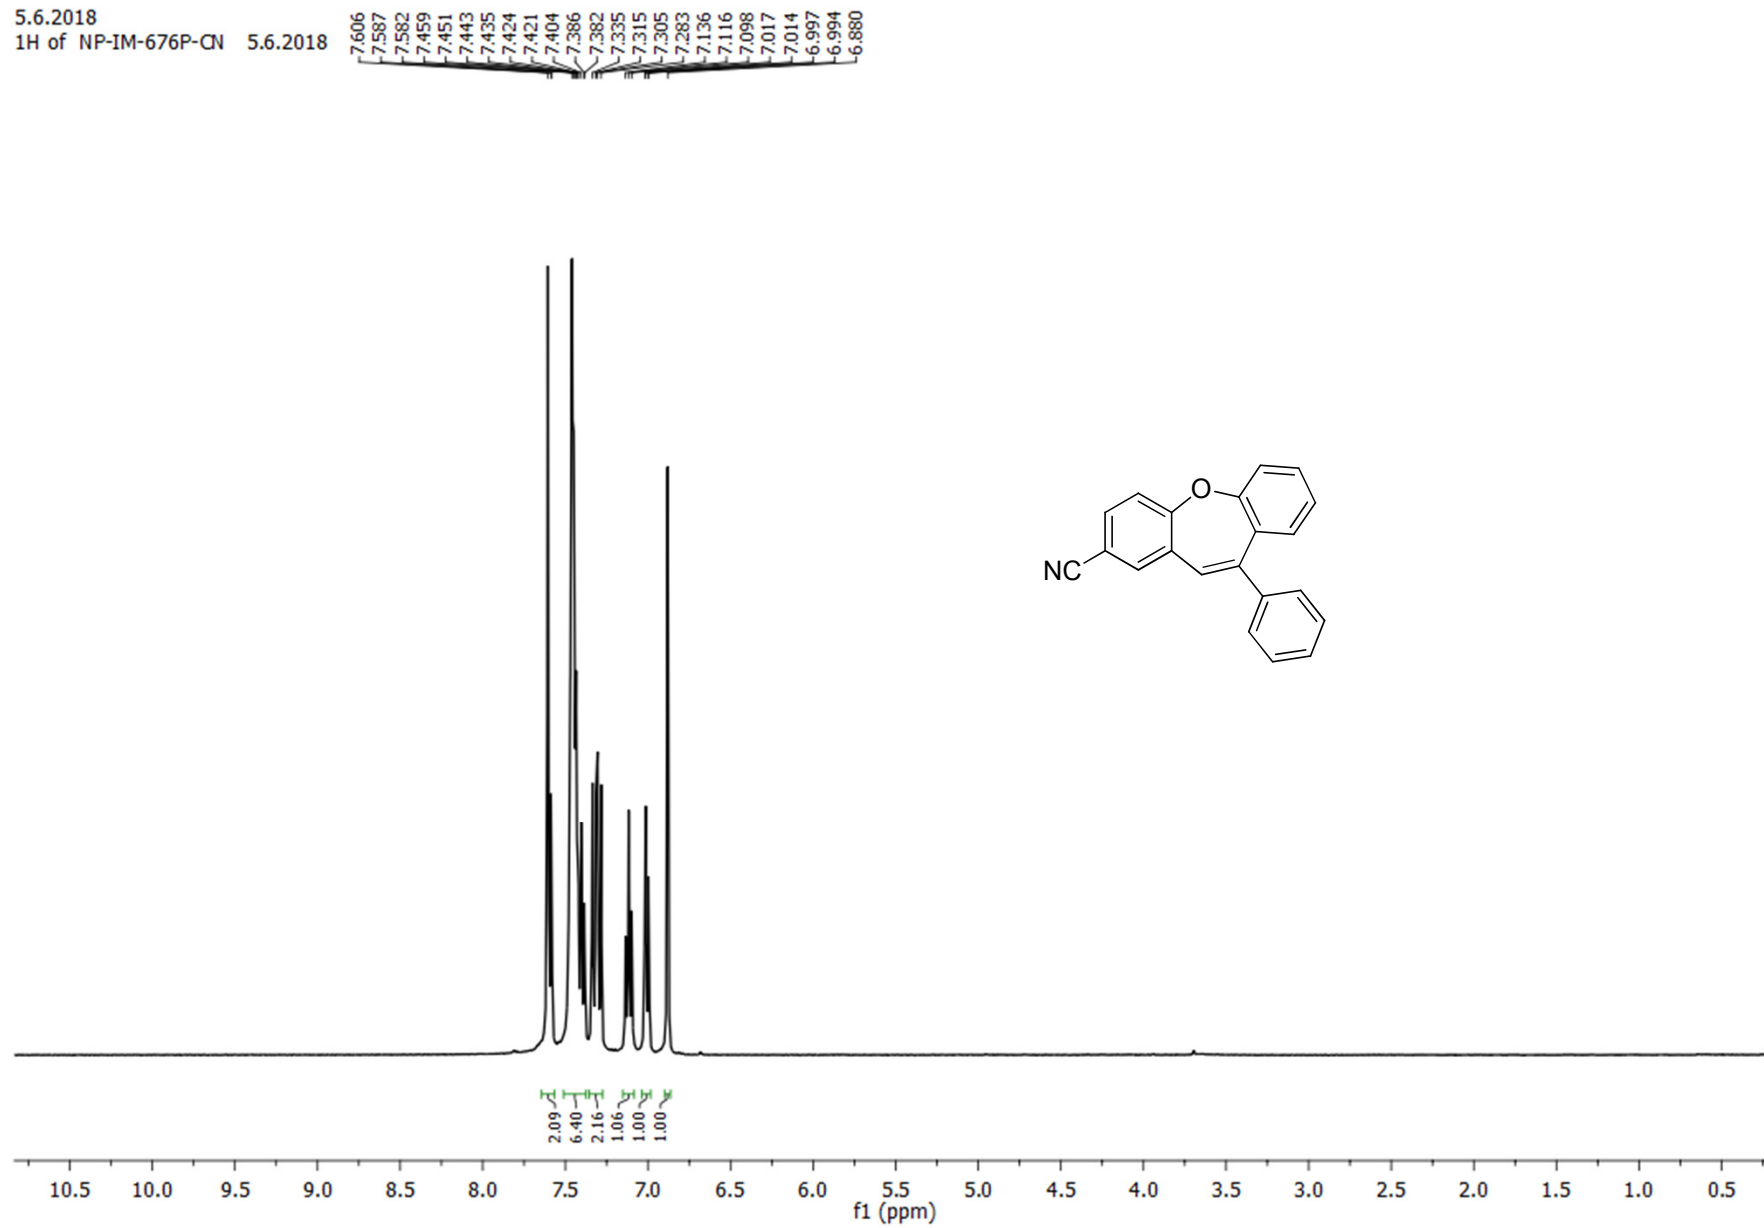

**$^{13}\text{C}$  NMR of 10-phenyldibenzo[b,f]oxepine-2-carbonitrile (3f)**

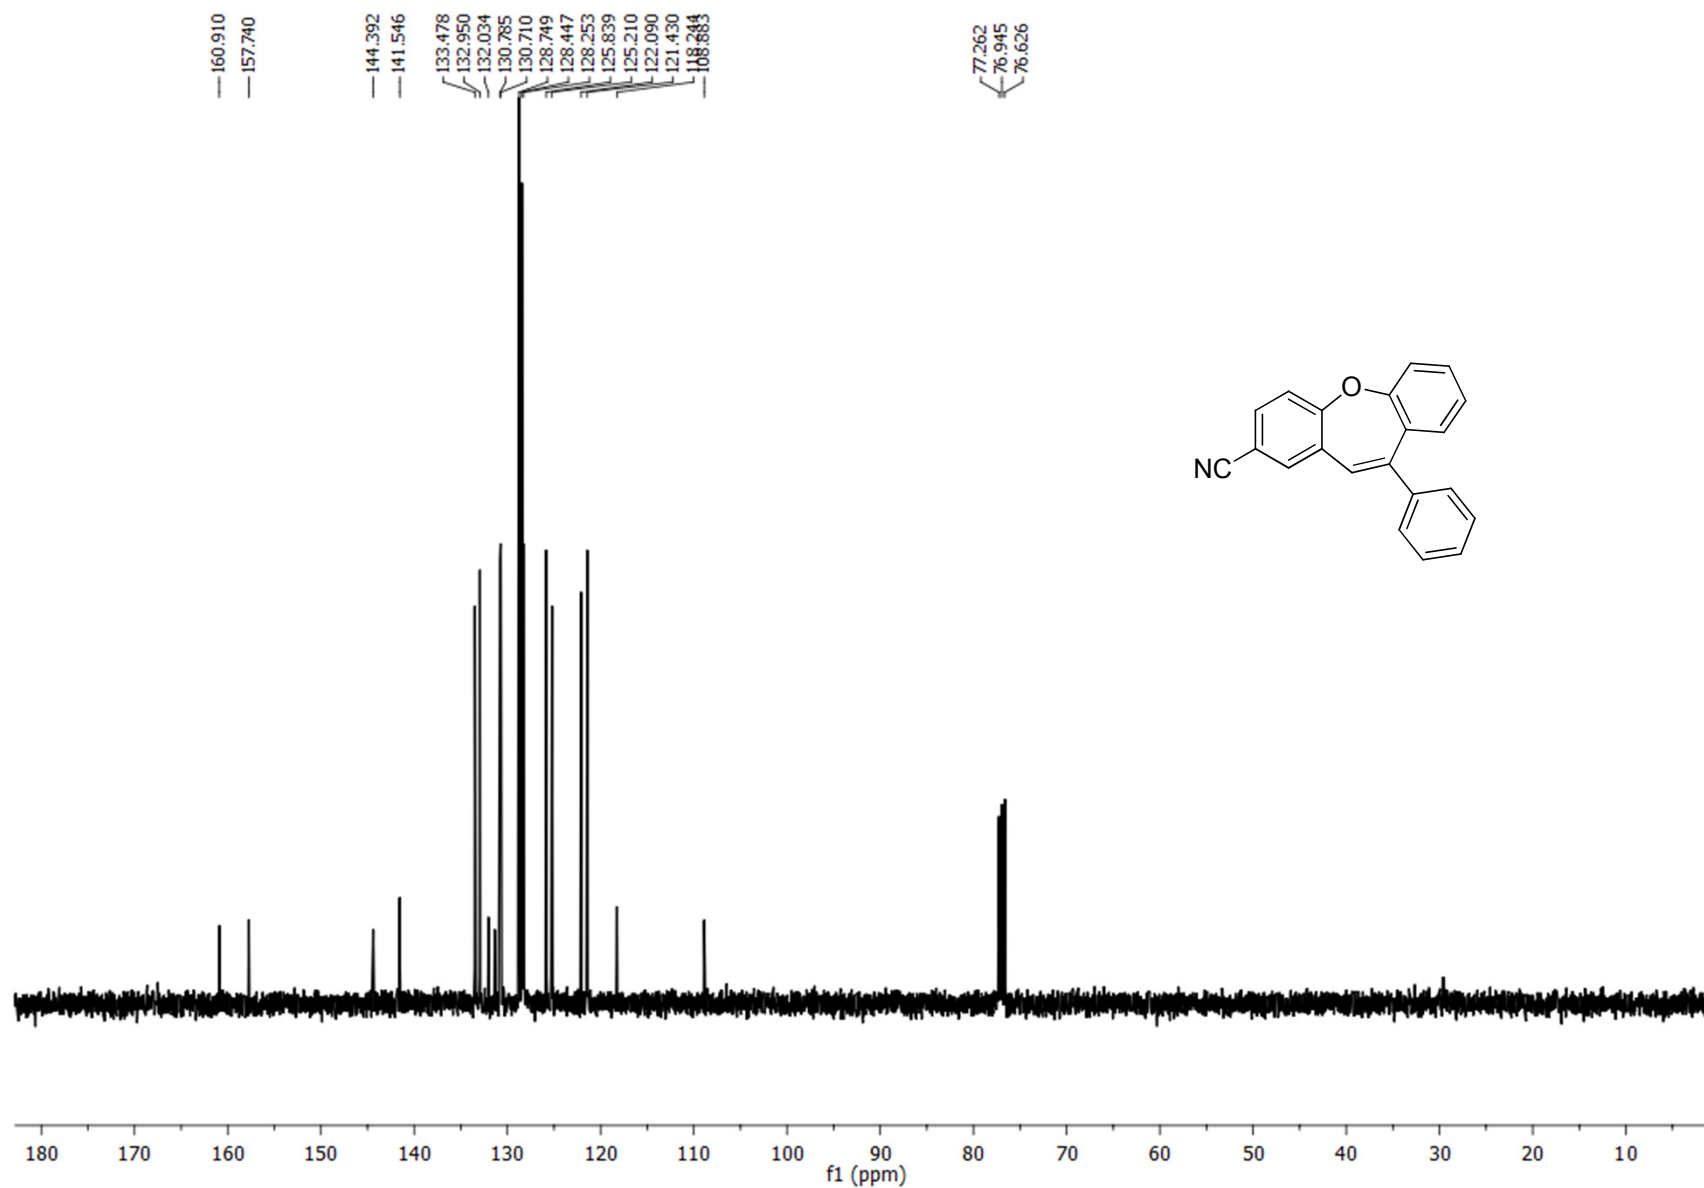



**<sup>1</sup>H NMR of N,N,10-triphenyldibenzo[b,f]oxepine-2-carboxamide (3g)**

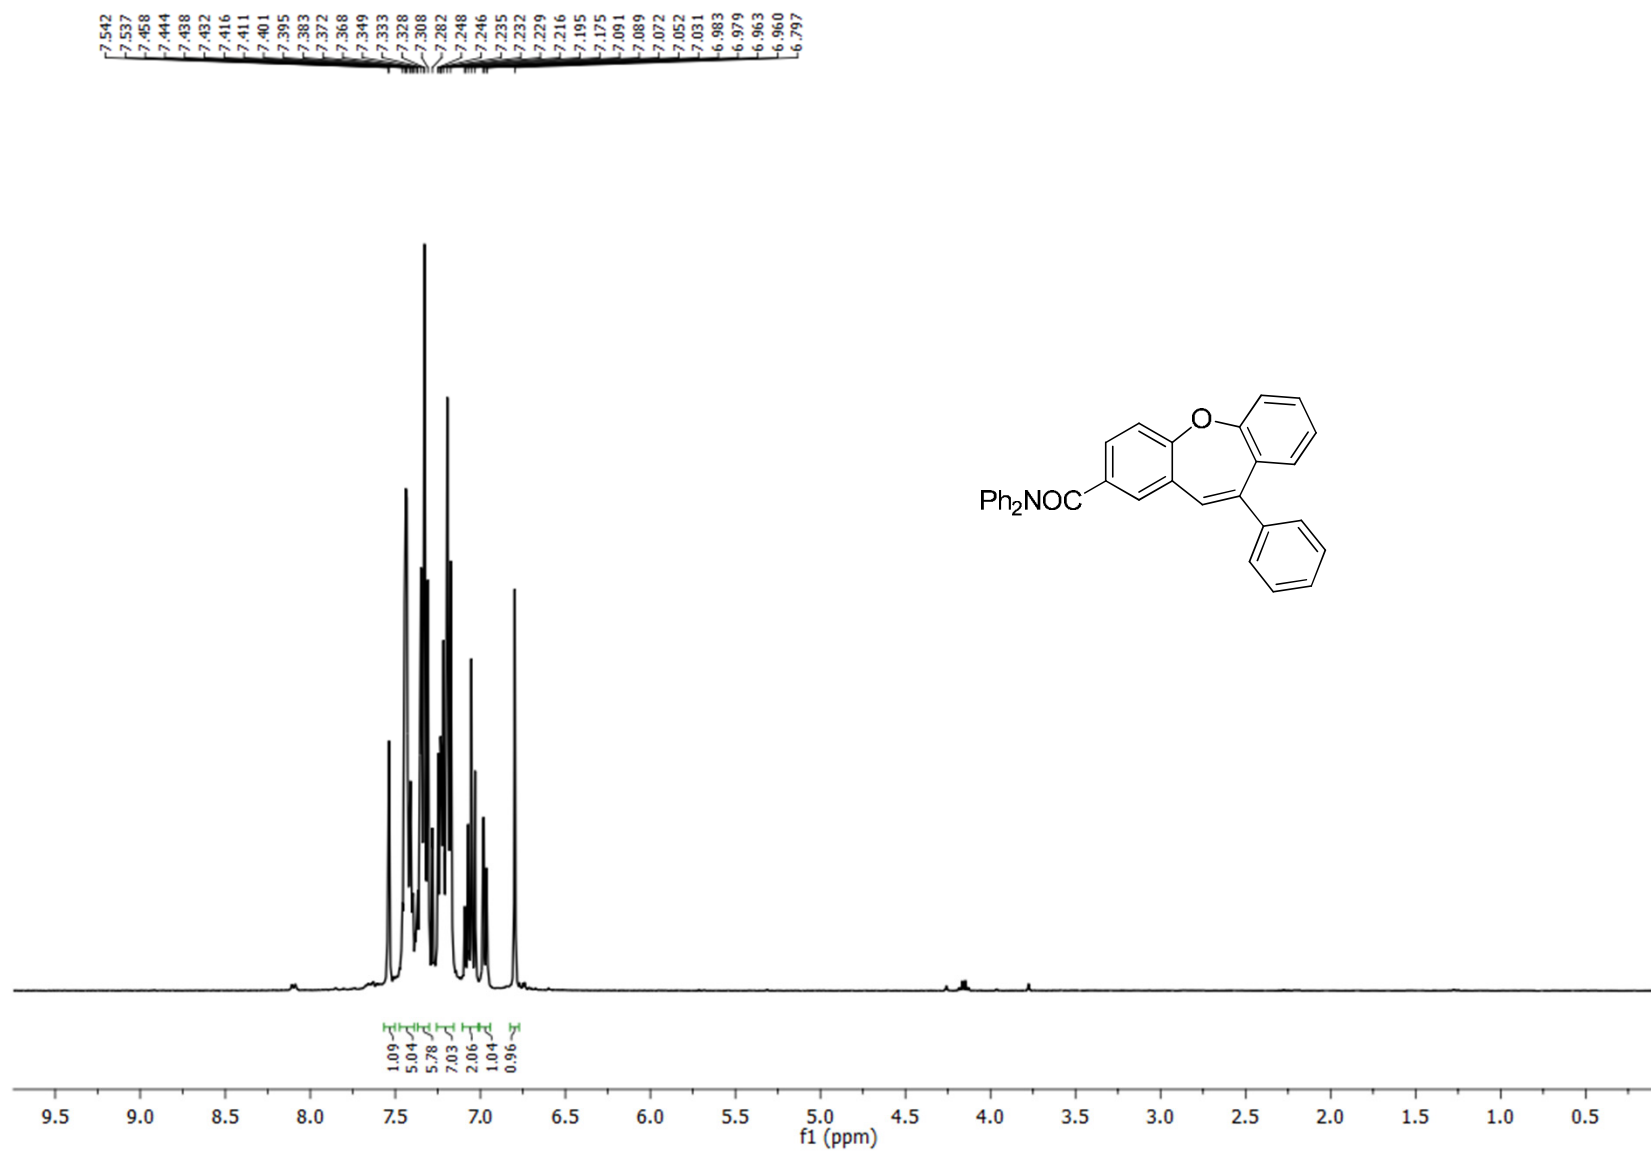

**$^{13}\text{C}$  NMR of N,N,10-triphenyldibenzo[b,f]oxepine-2-carboxamide (3g)**

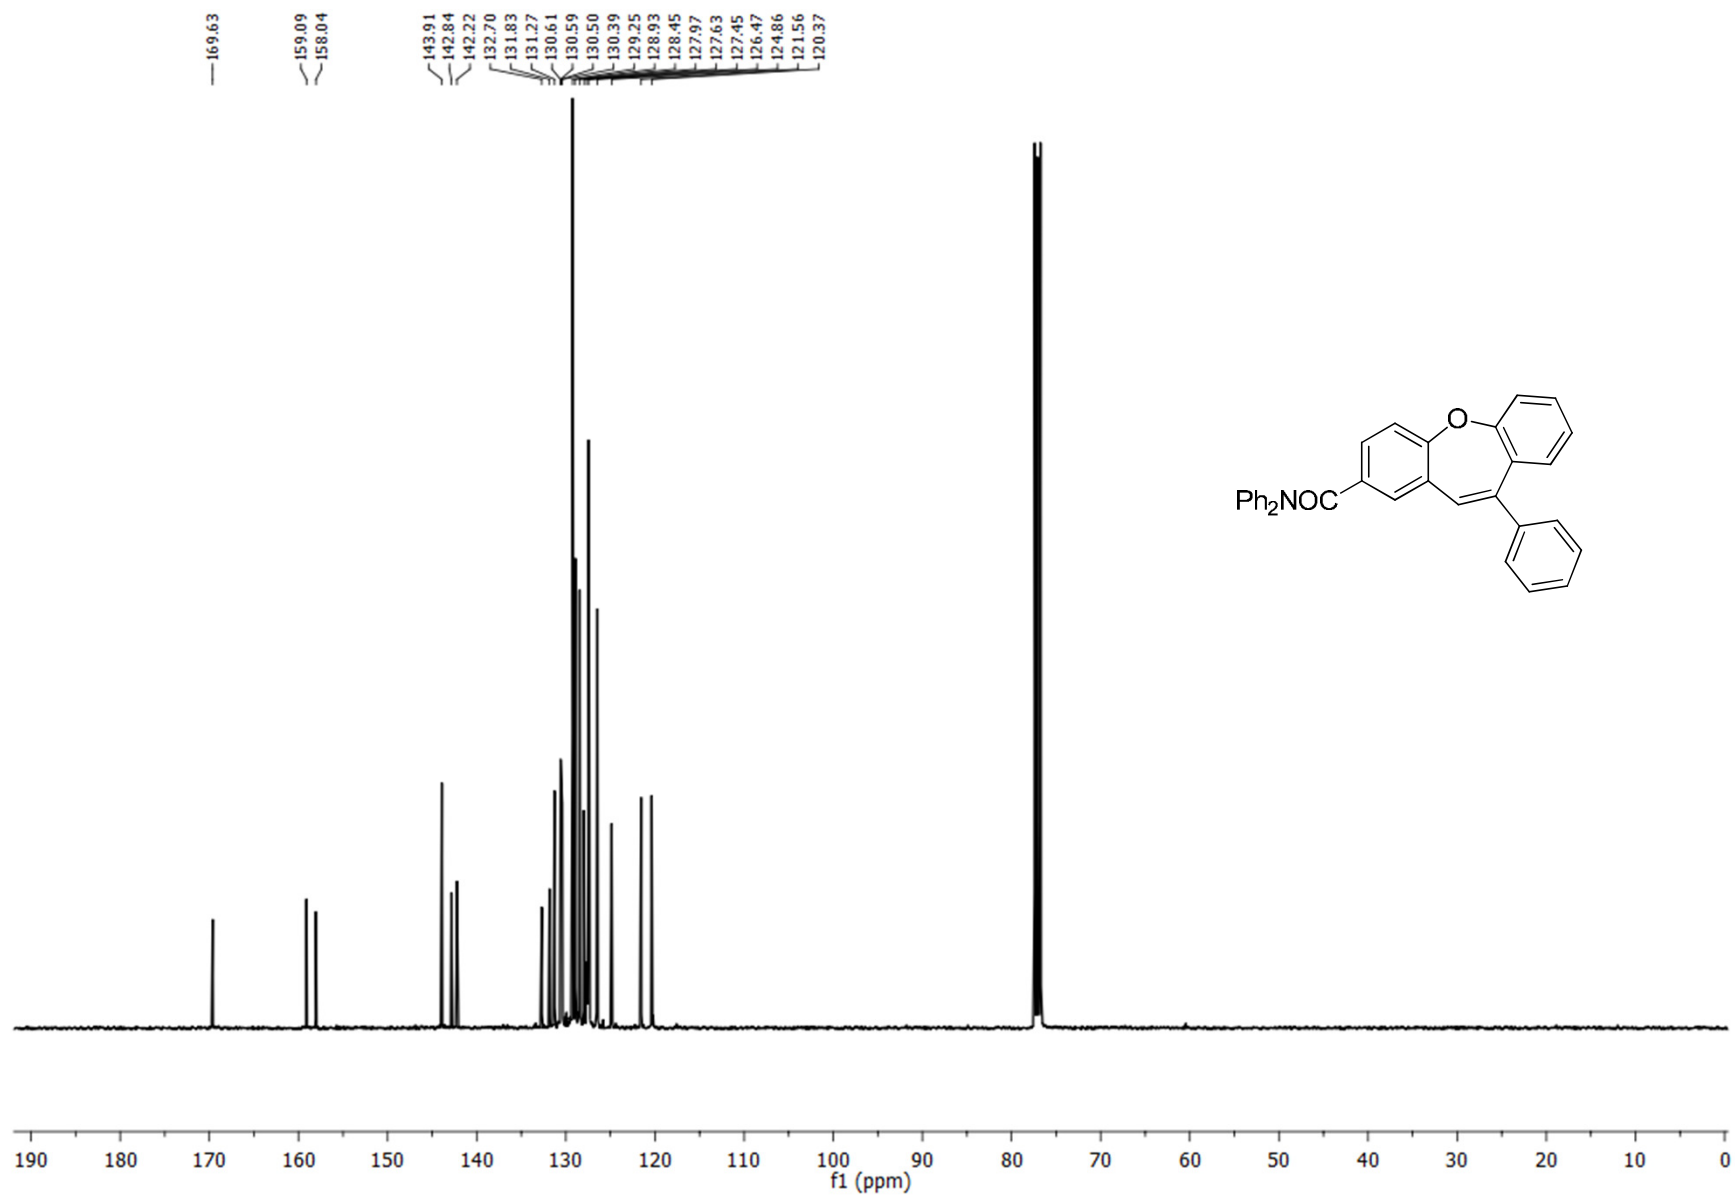

# <sup>1</sup>H NMR of 10-phenyldibenzo[b,f]oxepine-2-carbaldehyde (3h)

11.4.2018

<sup>1</sup>H of NP-IM-676(P-CHO) 11.4.2018

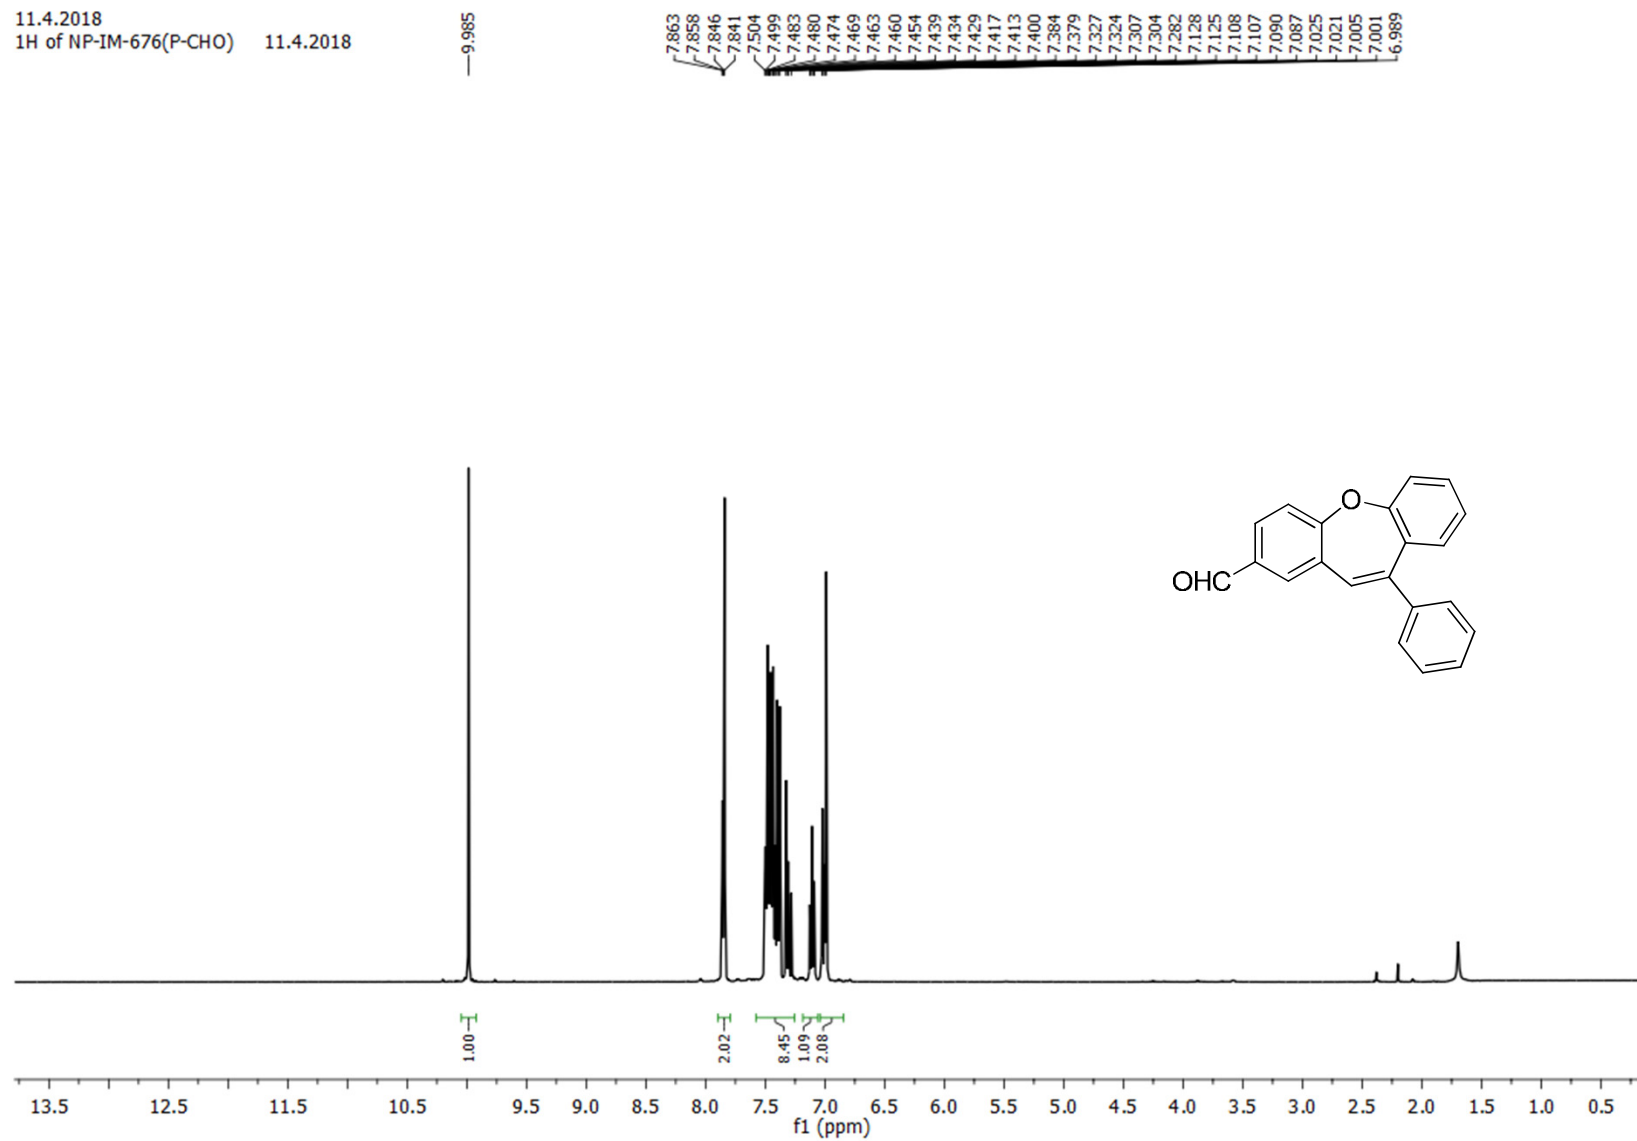

**<sup>13</sup>C NMR of 10-phenyldibenzo[b,f]oxepine-2-carbaldehyde (3h)**

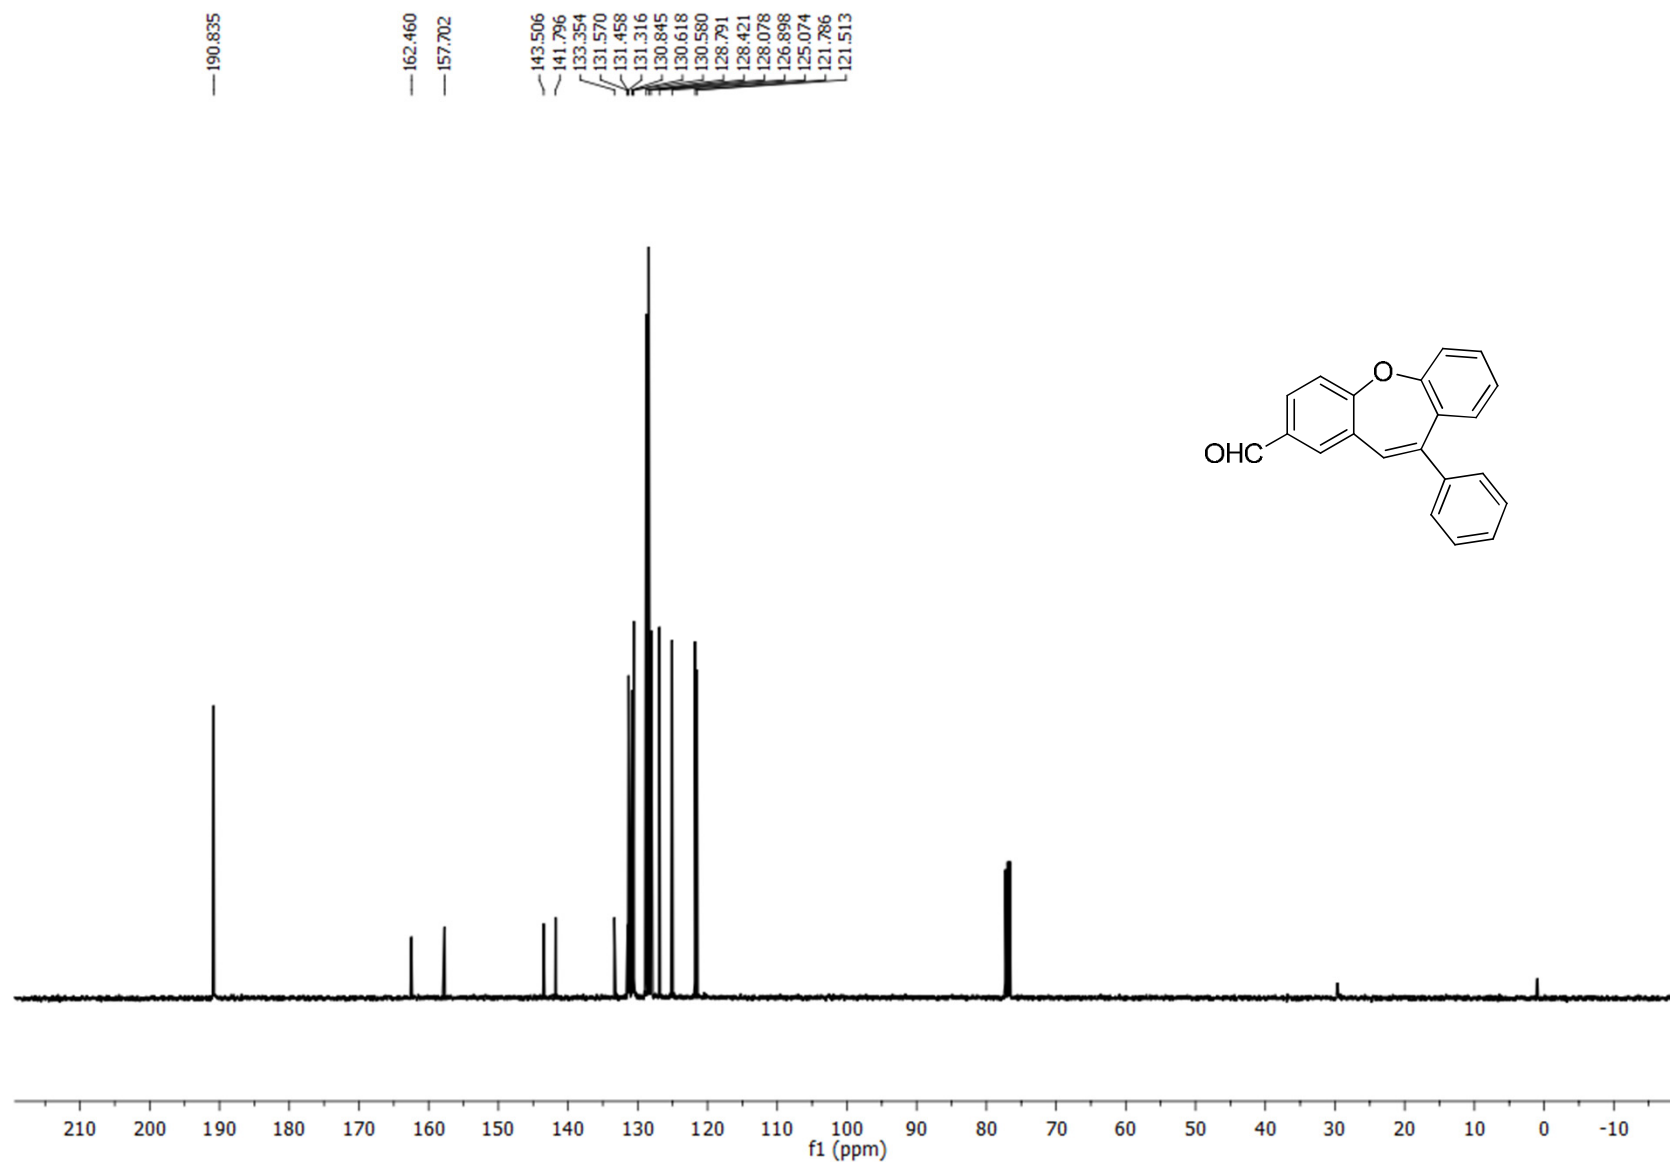

**<sup>1</sup>H NMR of 1-nitro-10-phenyldibenzo[b,f]oxepine (3i)**

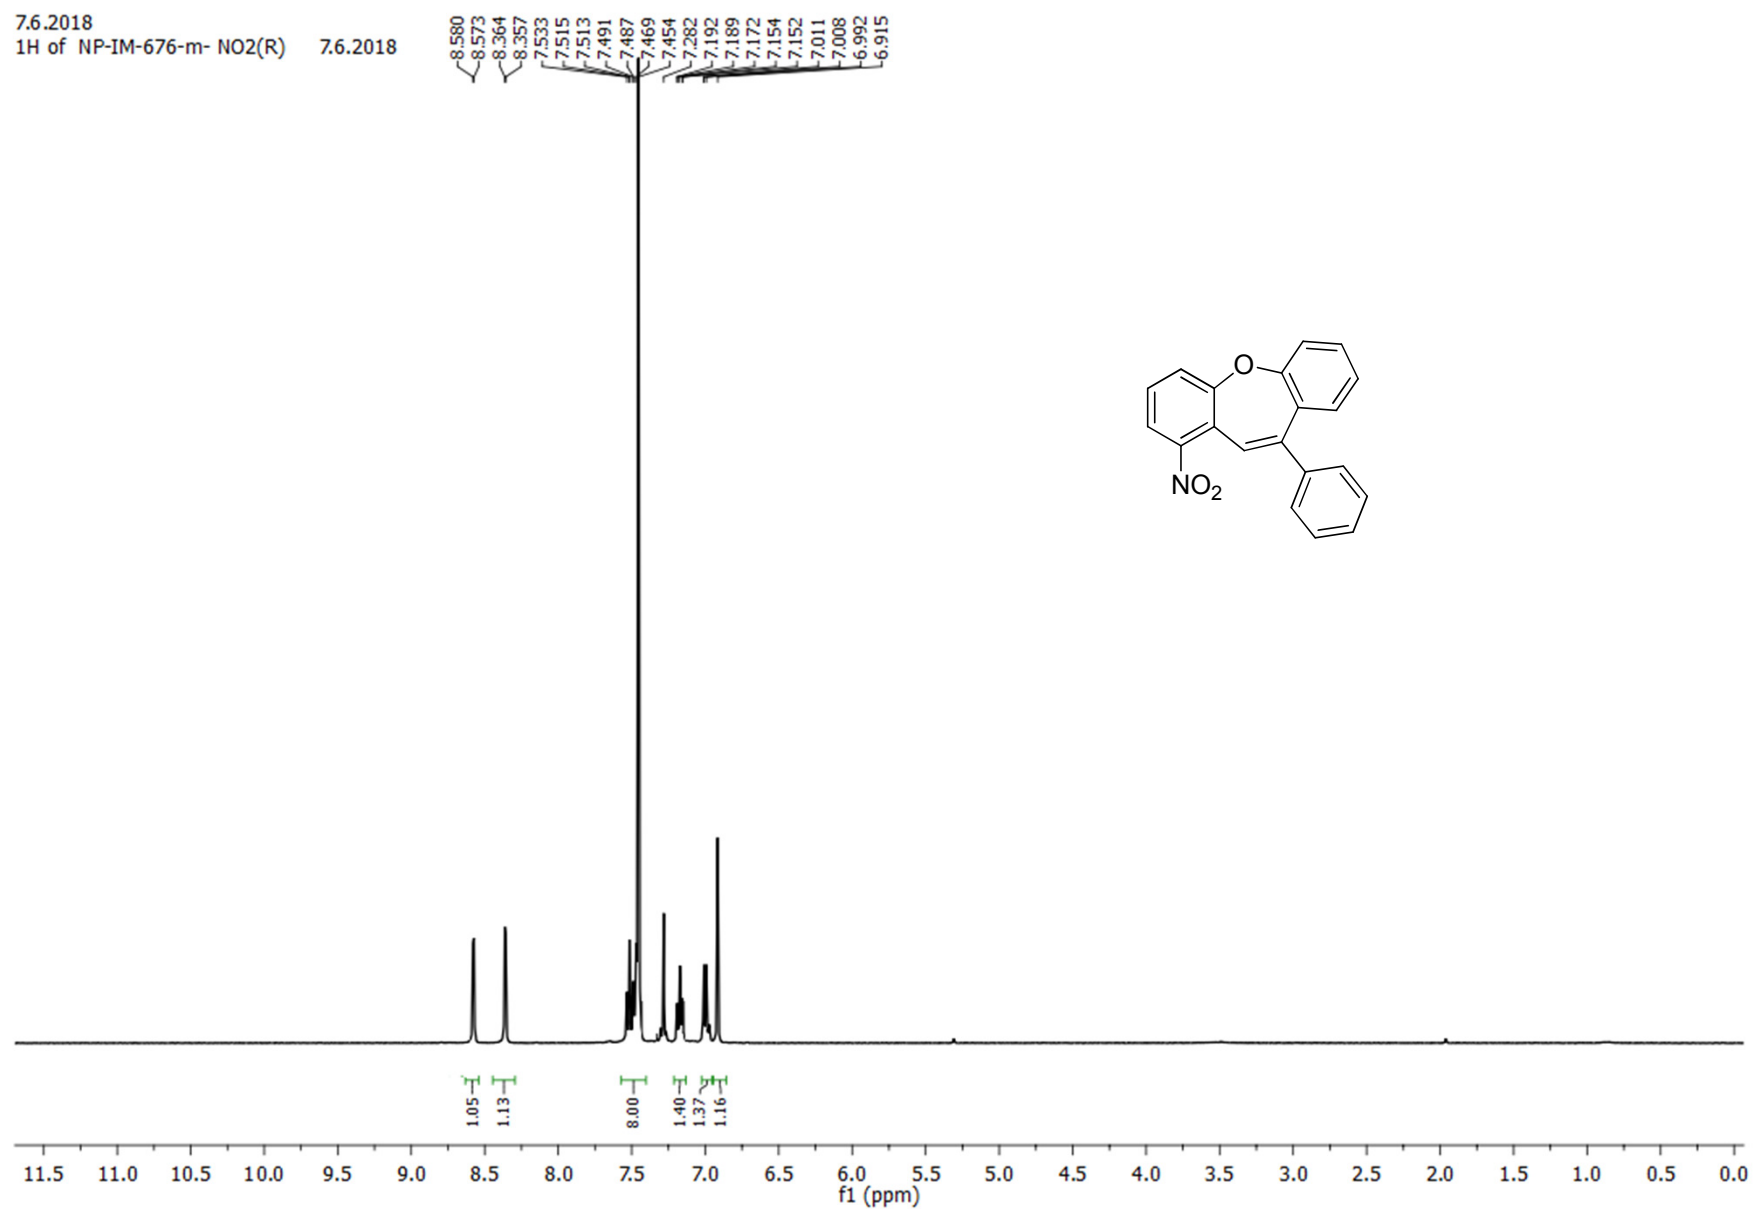

S

**<sup>13</sup>C NMR of 1-nitro-10-phenyldibenzo[b,f]oxepine (3i)**

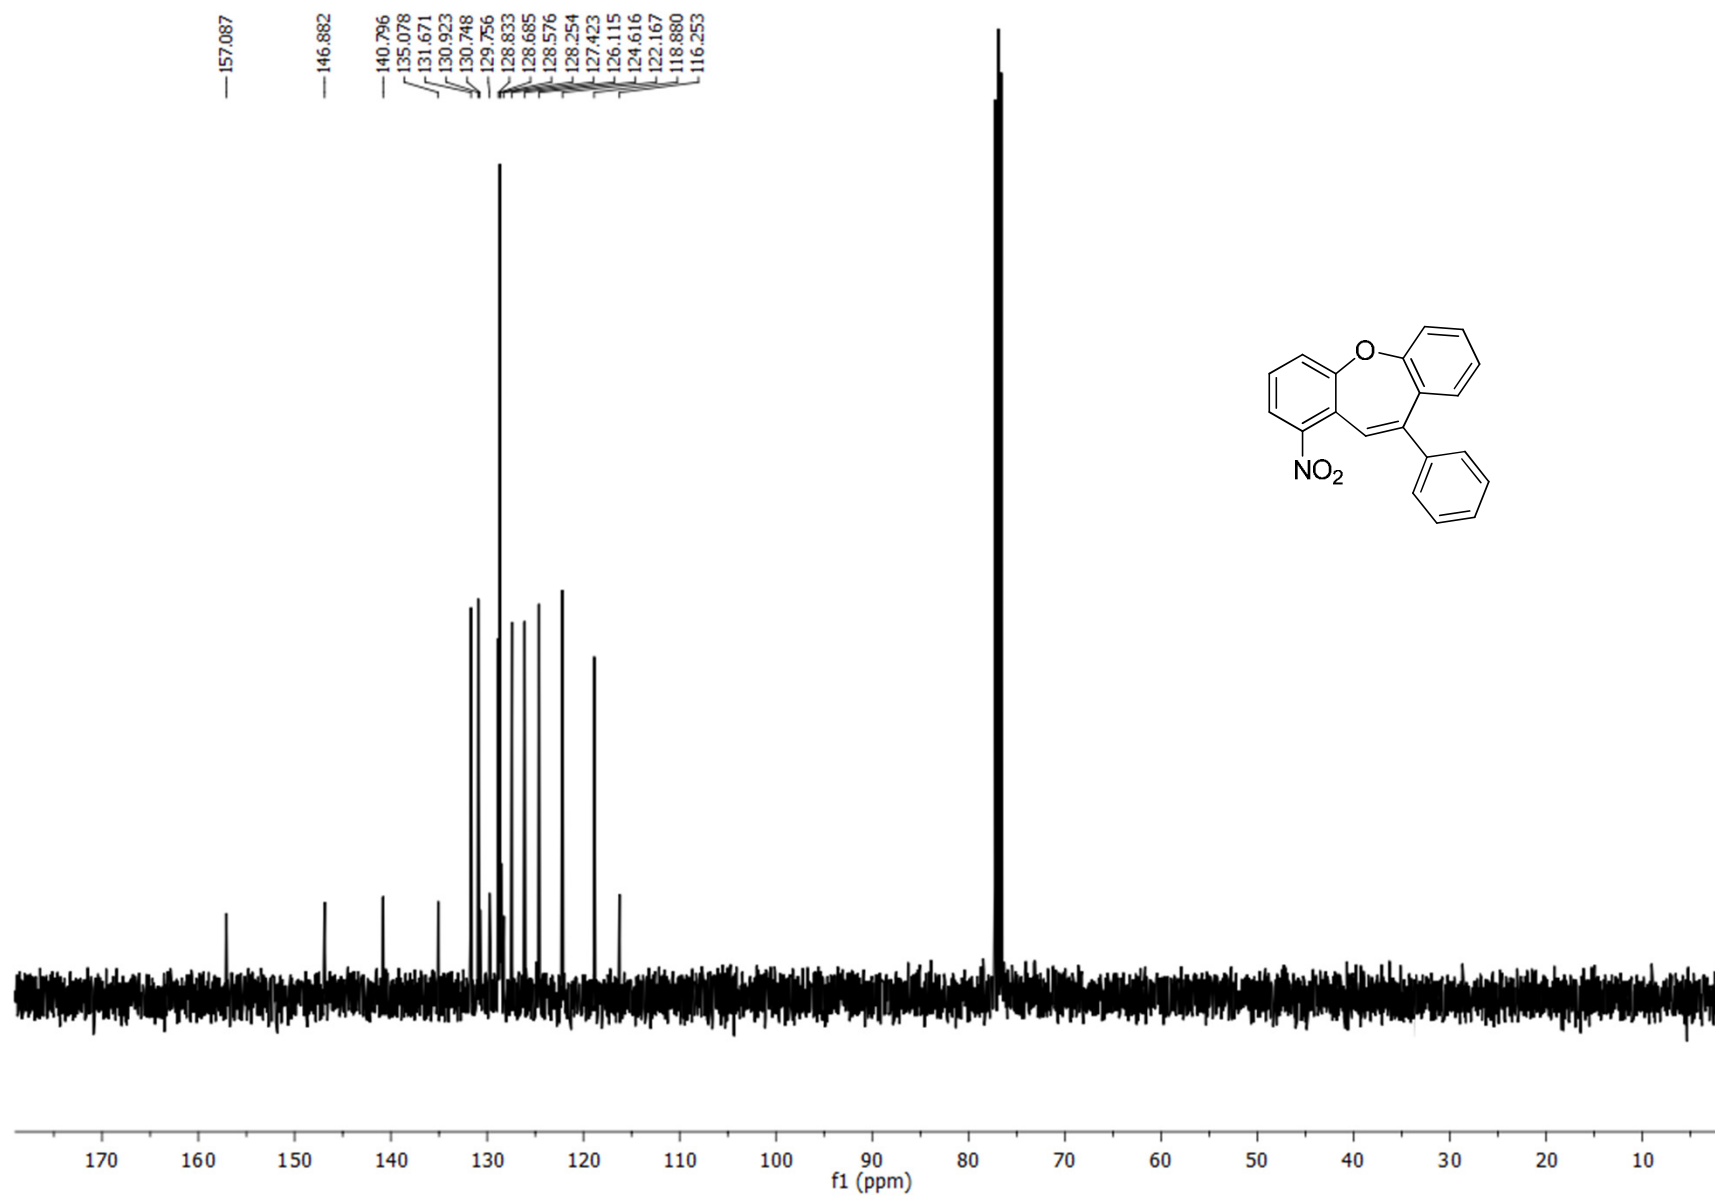

<sup>1</sup>H NMR of 10-phenyldibenzo[b,f]oxepine-1-carbaldehyde (3j)

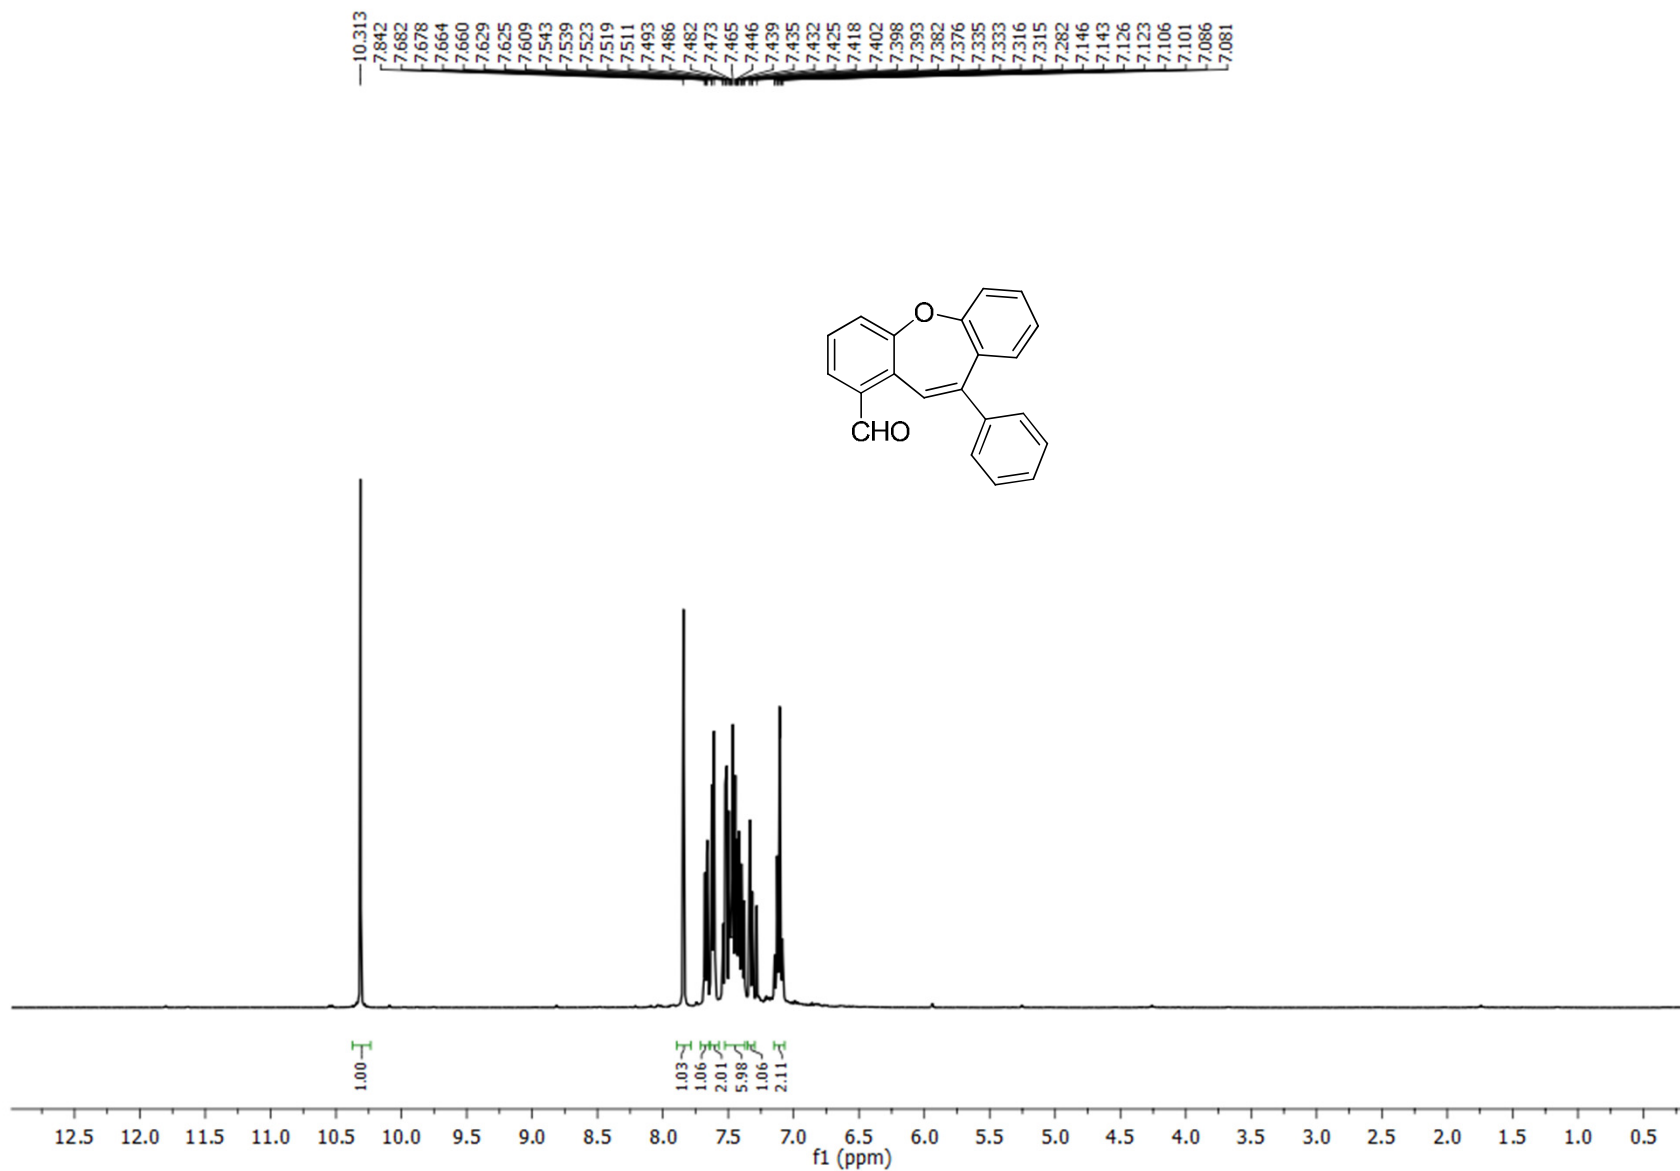

**<sup>13</sup>C NMR of 10-phenyldibenzo[b,f]oxepine-1-carbaldehyde (3j)**

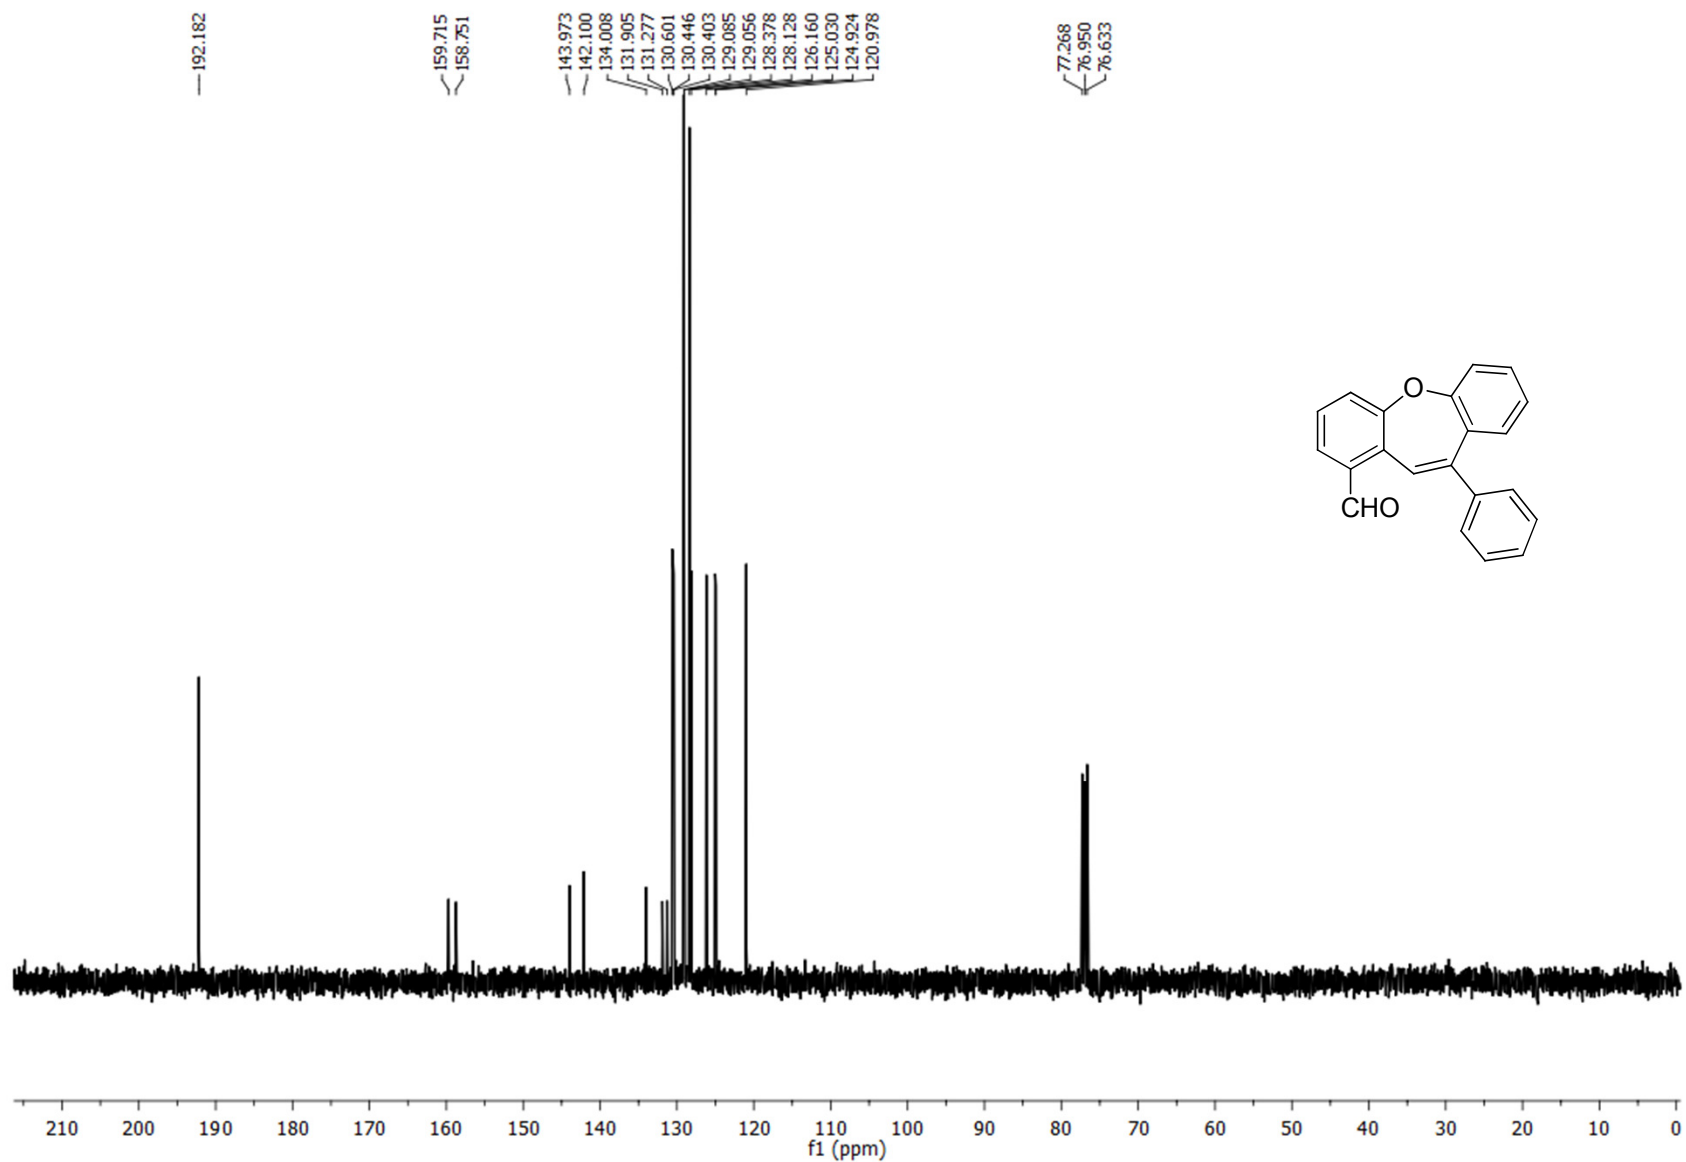



<sup>1</sup>H NMR of 8-methyl-2-nitro-10-phenyldibenzo[b,f]oxepine (3k)

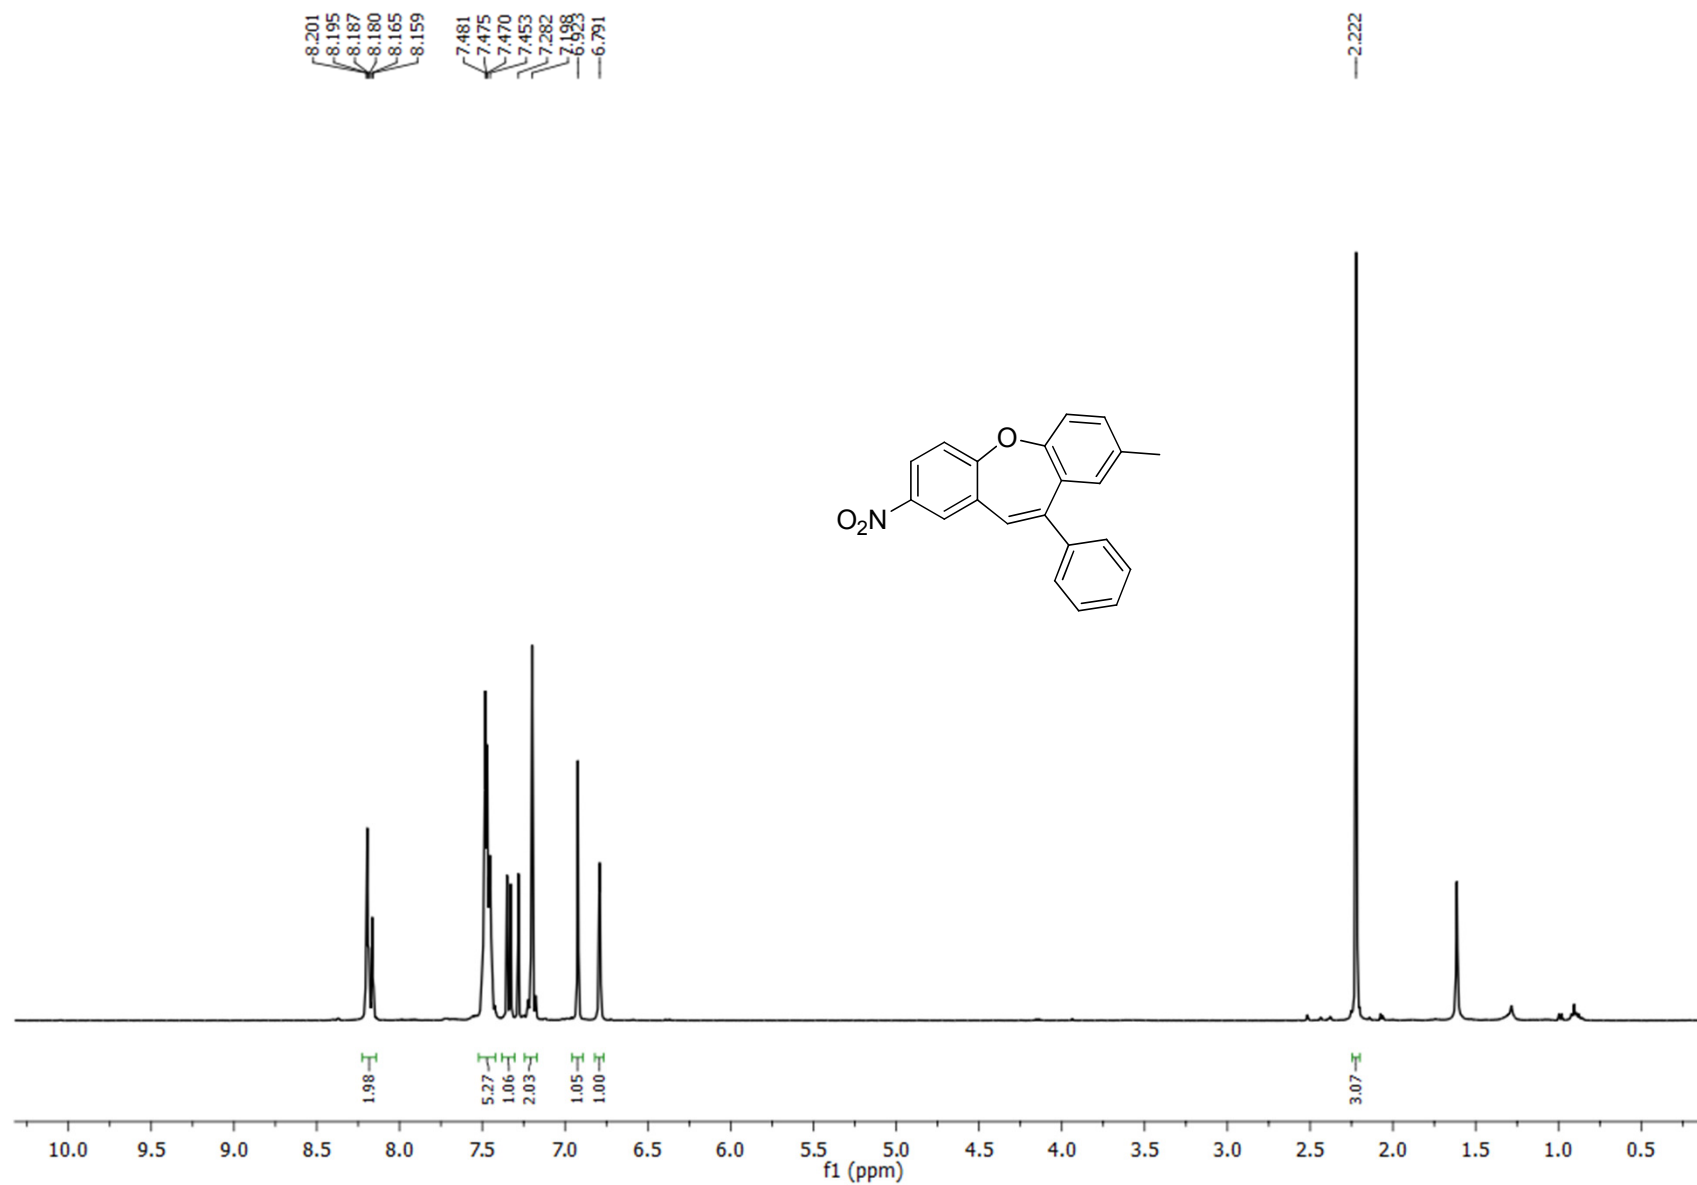

**$^{13}\text{C}$  NMR of 8-methyl-2-nitro-10-phenyldibenzo[b,f]oxepine (3k)**

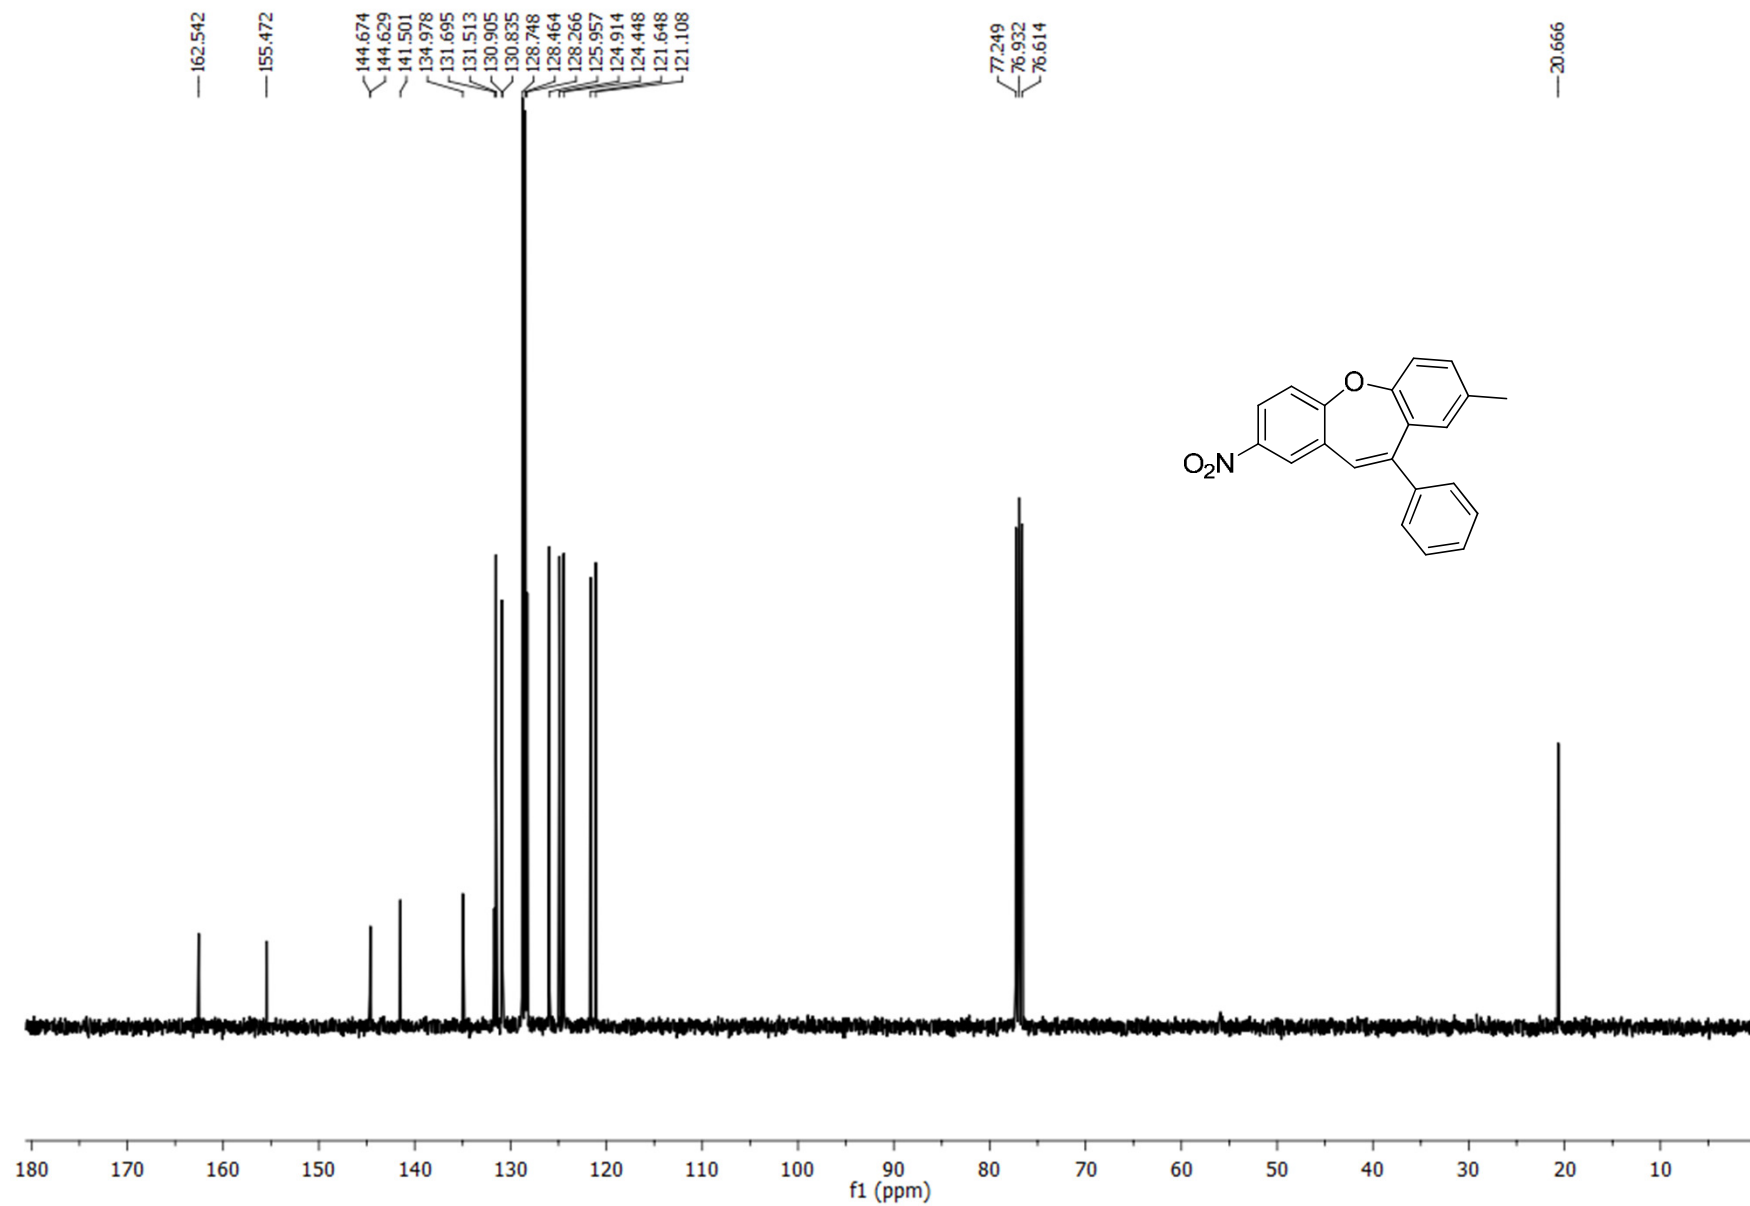

**<sup>1</sup>H NMR of 2,8-dinitro-10-phenyldibenzo[b,f]oxepine (3l)**

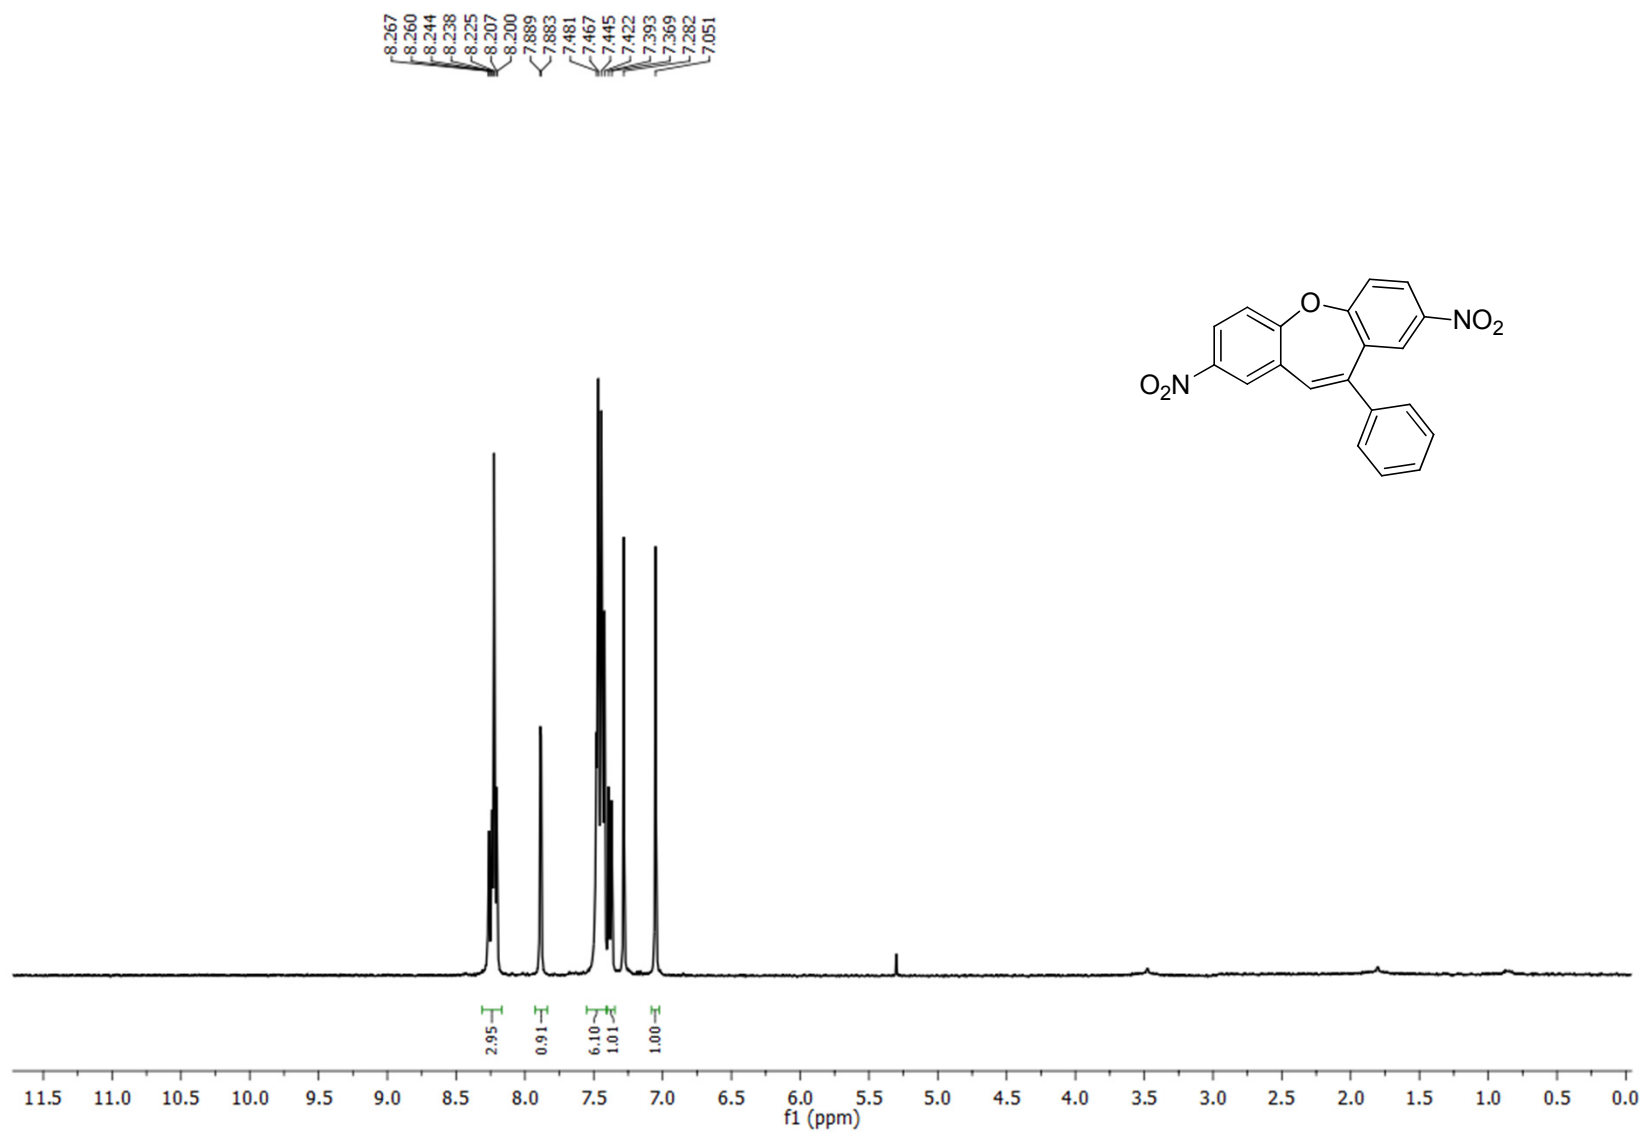

**$^{13}\text{C}$  NMR of 2,8-dinitro-10-phenyldibenzo[b,f]oxepine (3l)**

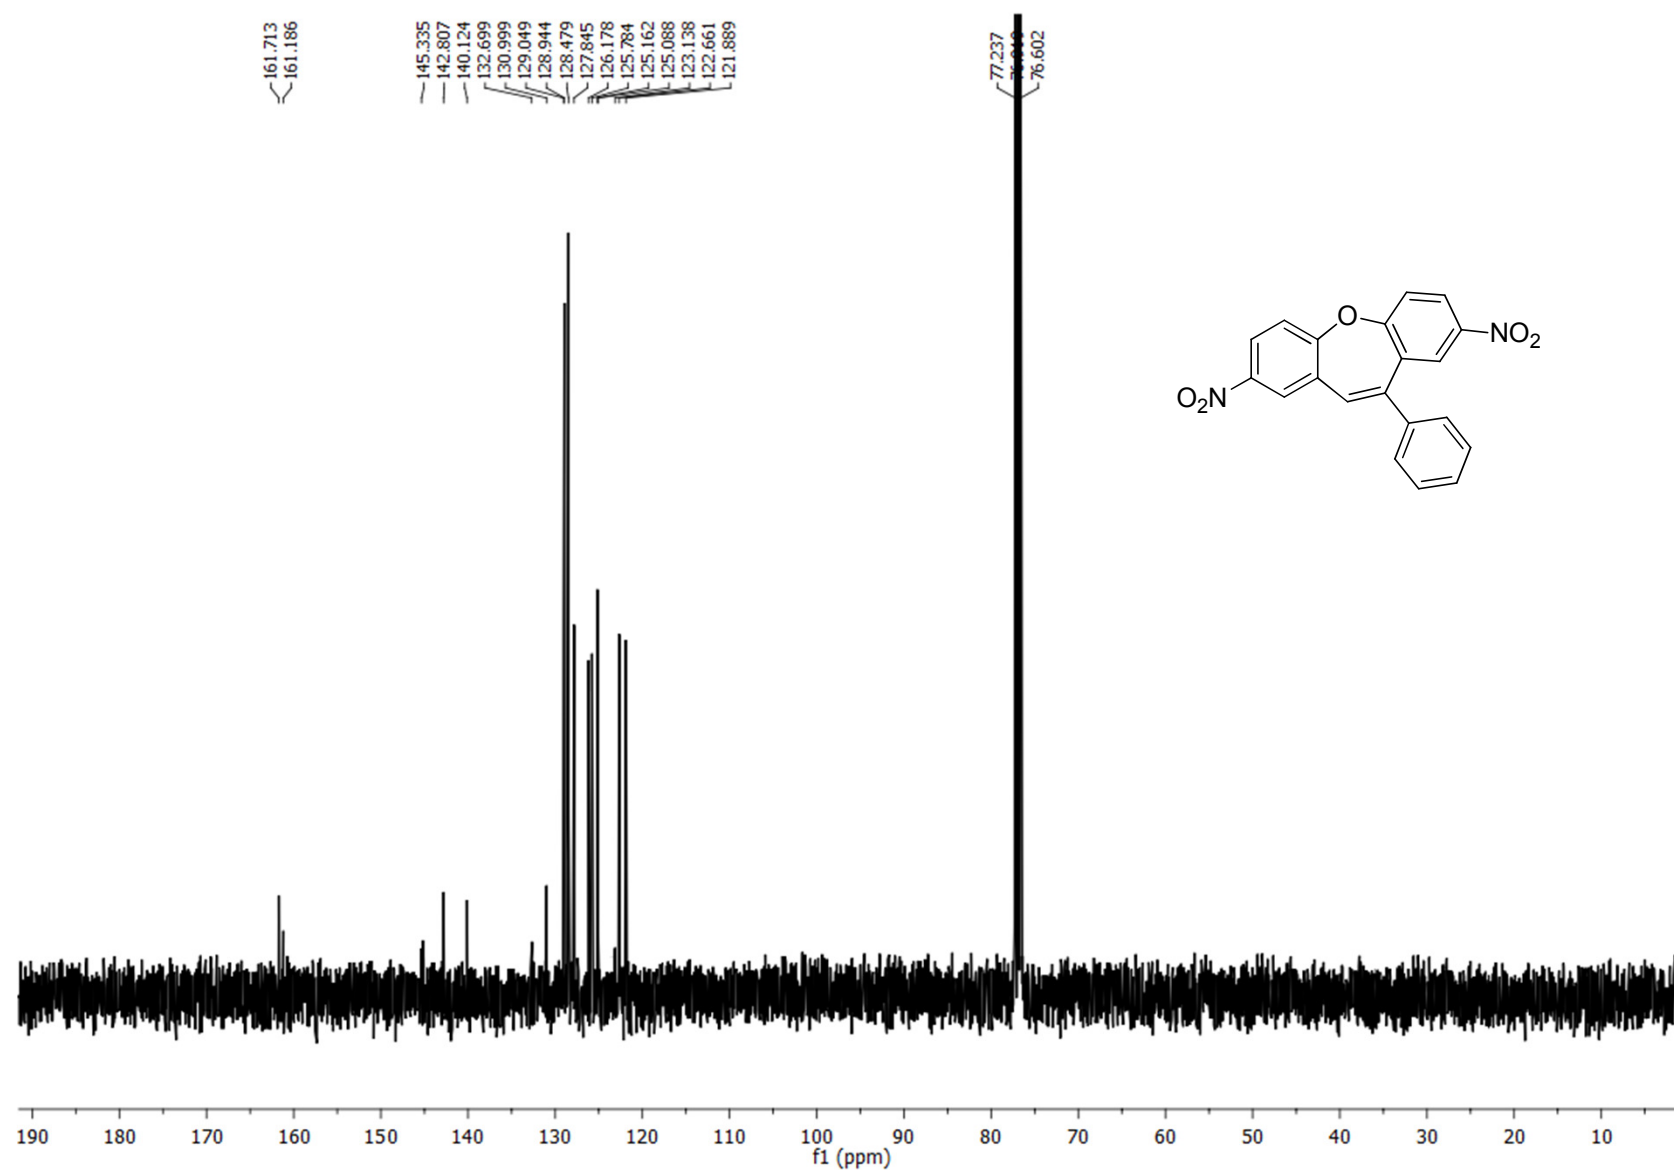

**<sup>1</sup>H NMR of 10-phenyldibenzo[b,f]oxepine (3o)**

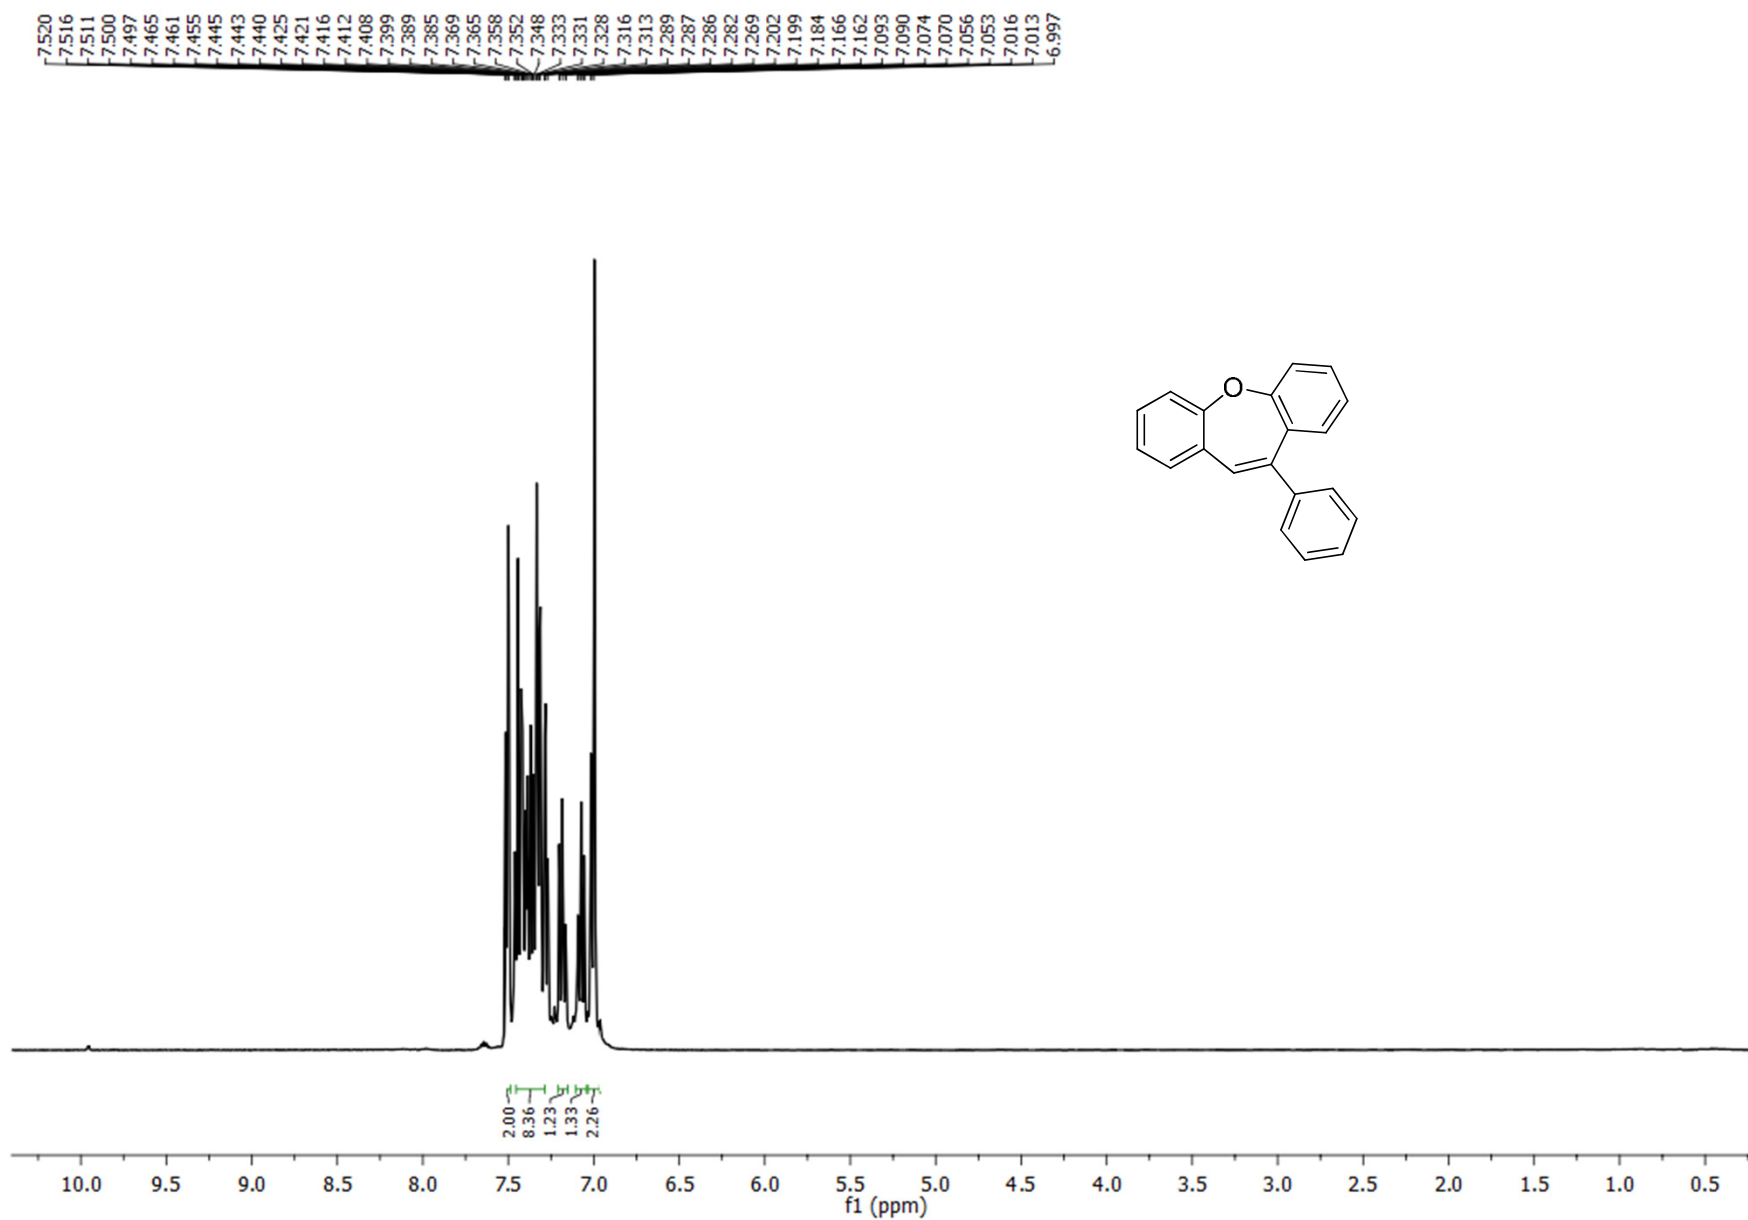

**$^{13}\text{C}$  NMR of 10-phenyldibenzo[b,f]oxepine (3o)**

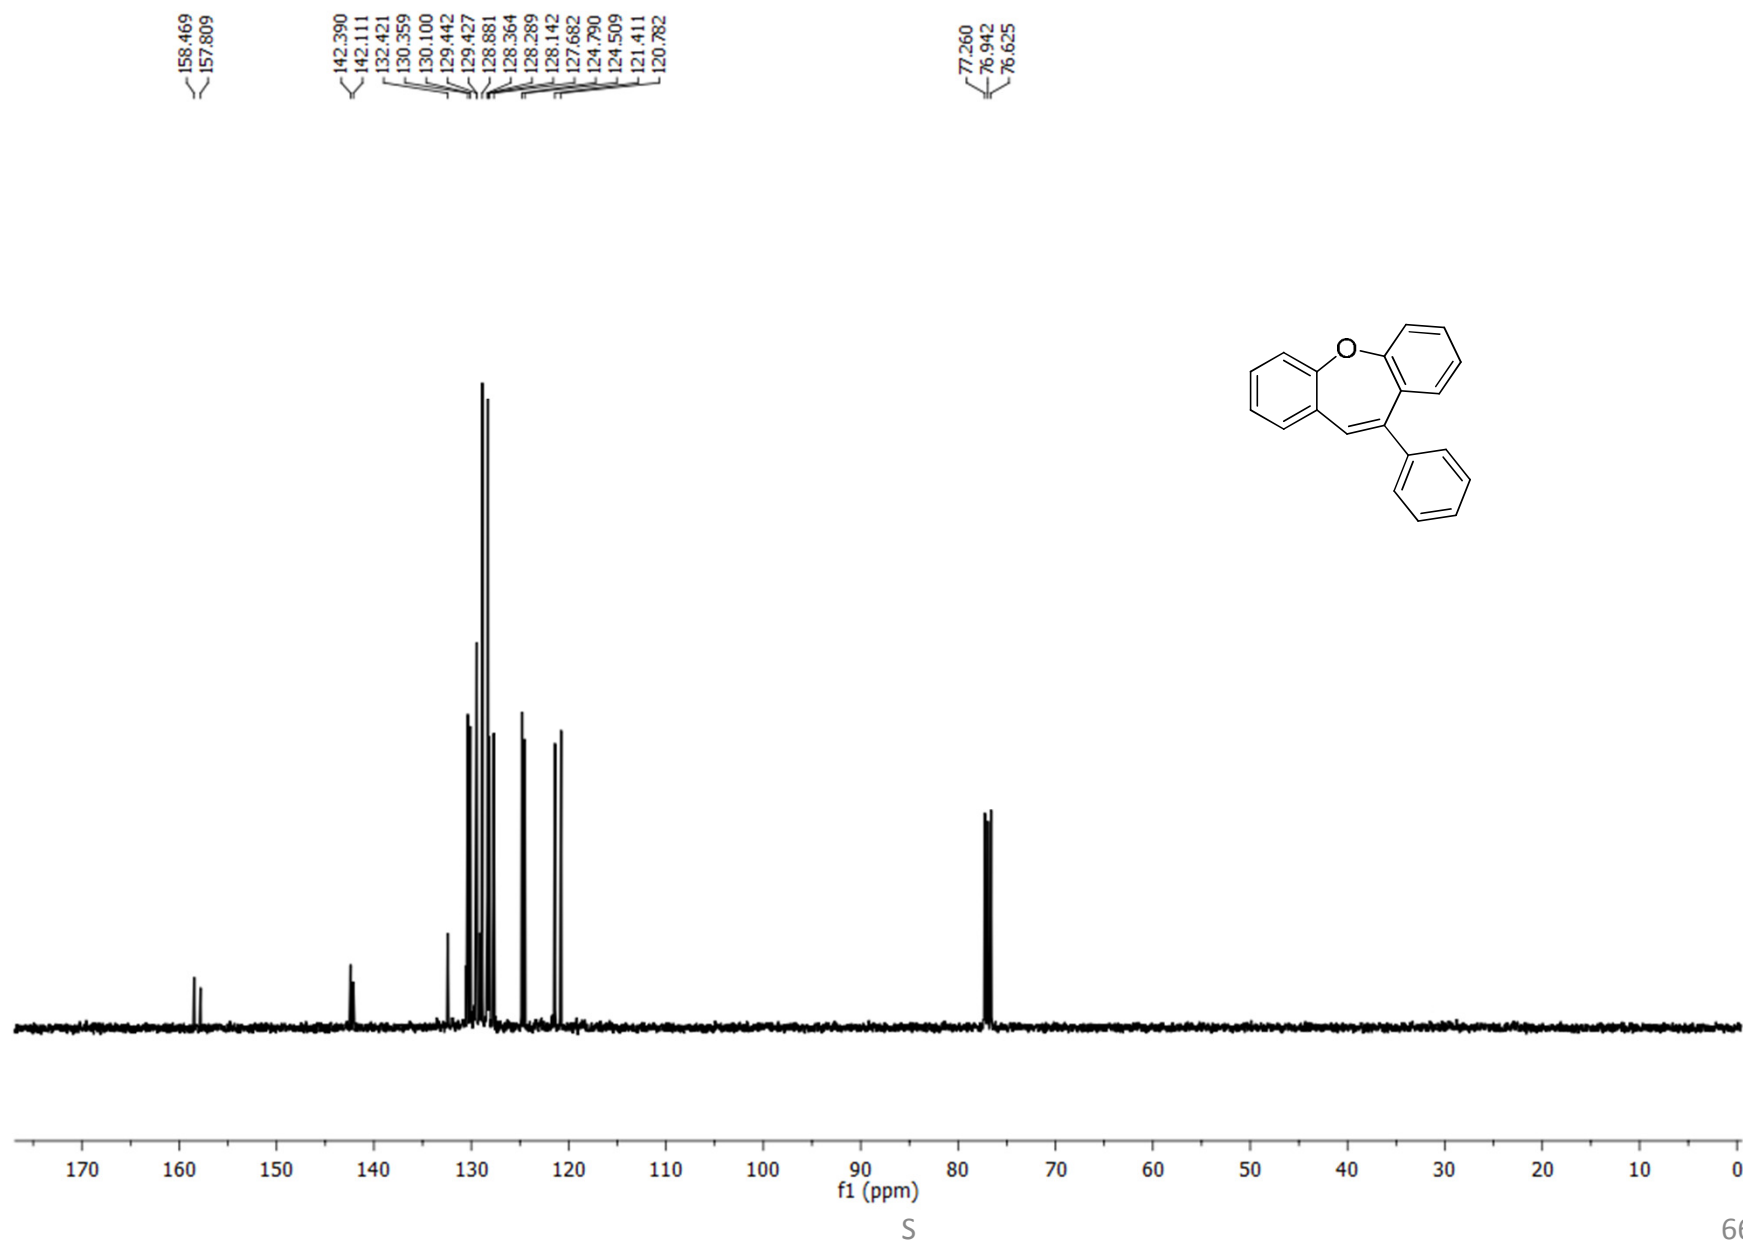

<sup>1</sup>H NMR of 2-Methyl-10-phenyldibenzo[*b,f*]oxepine (3p)

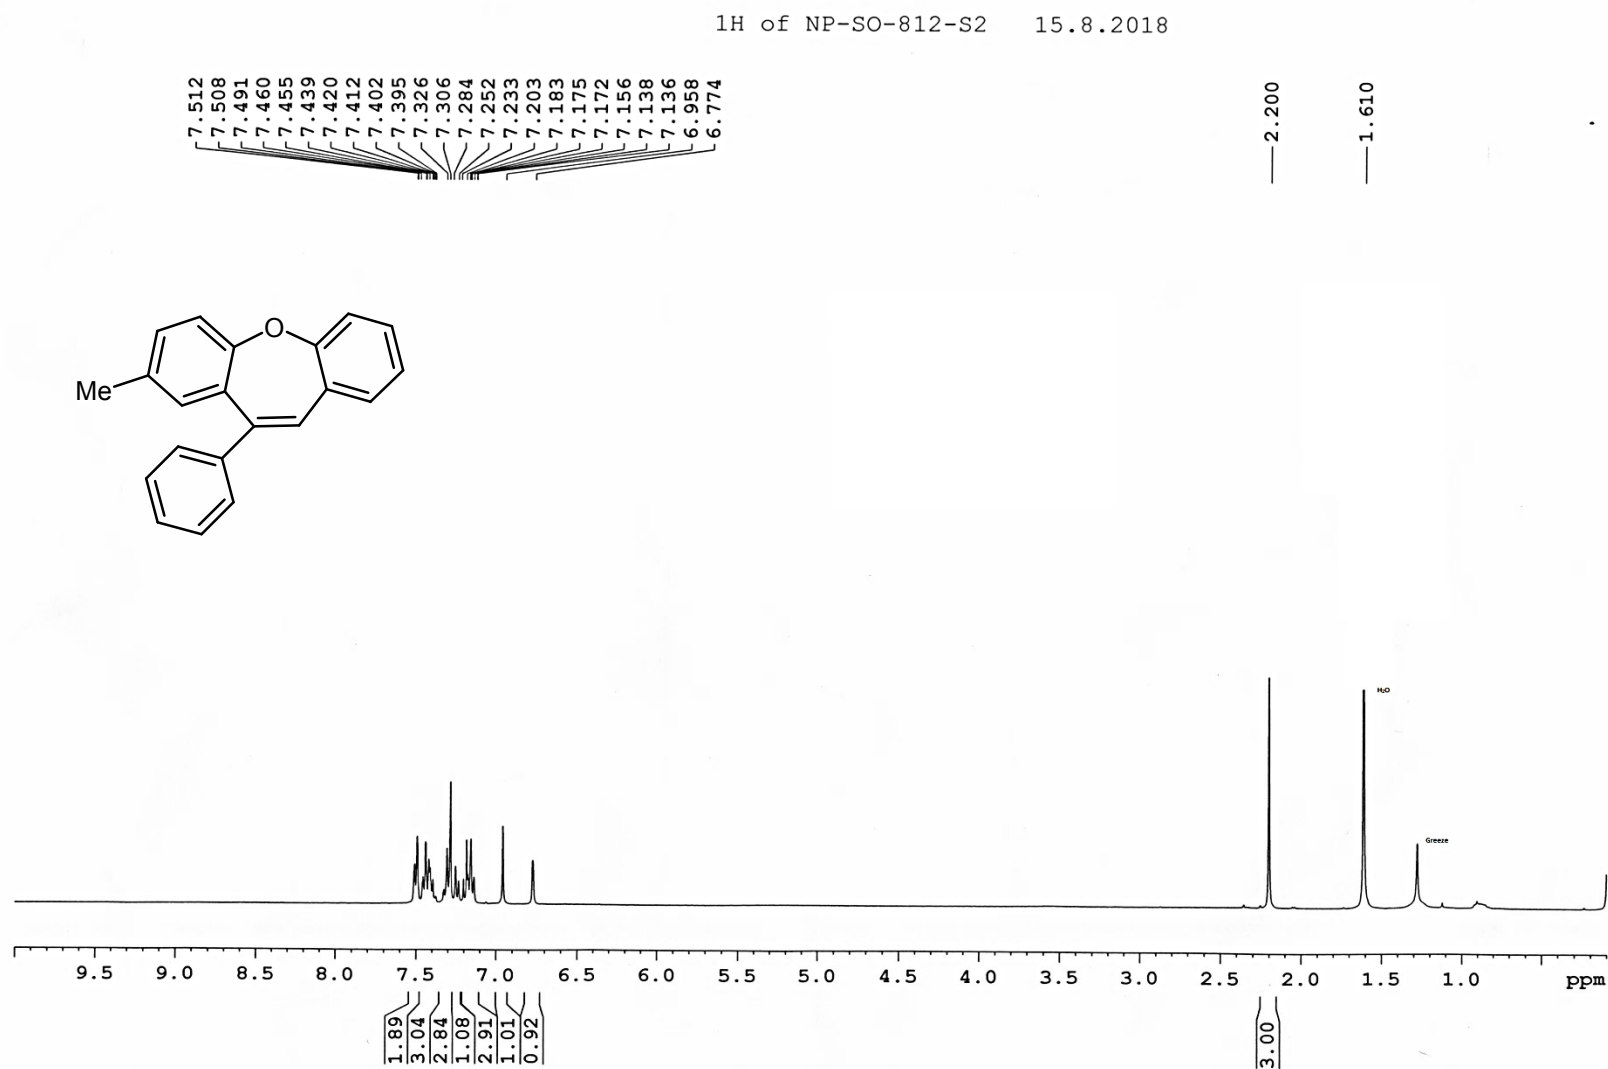

<sup>13</sup>C NMR of 2-Methyl-10-phenyldibenzo[*b,f*]oxepine (3p)

13C of NP-SO-812-S2 15.8.2018

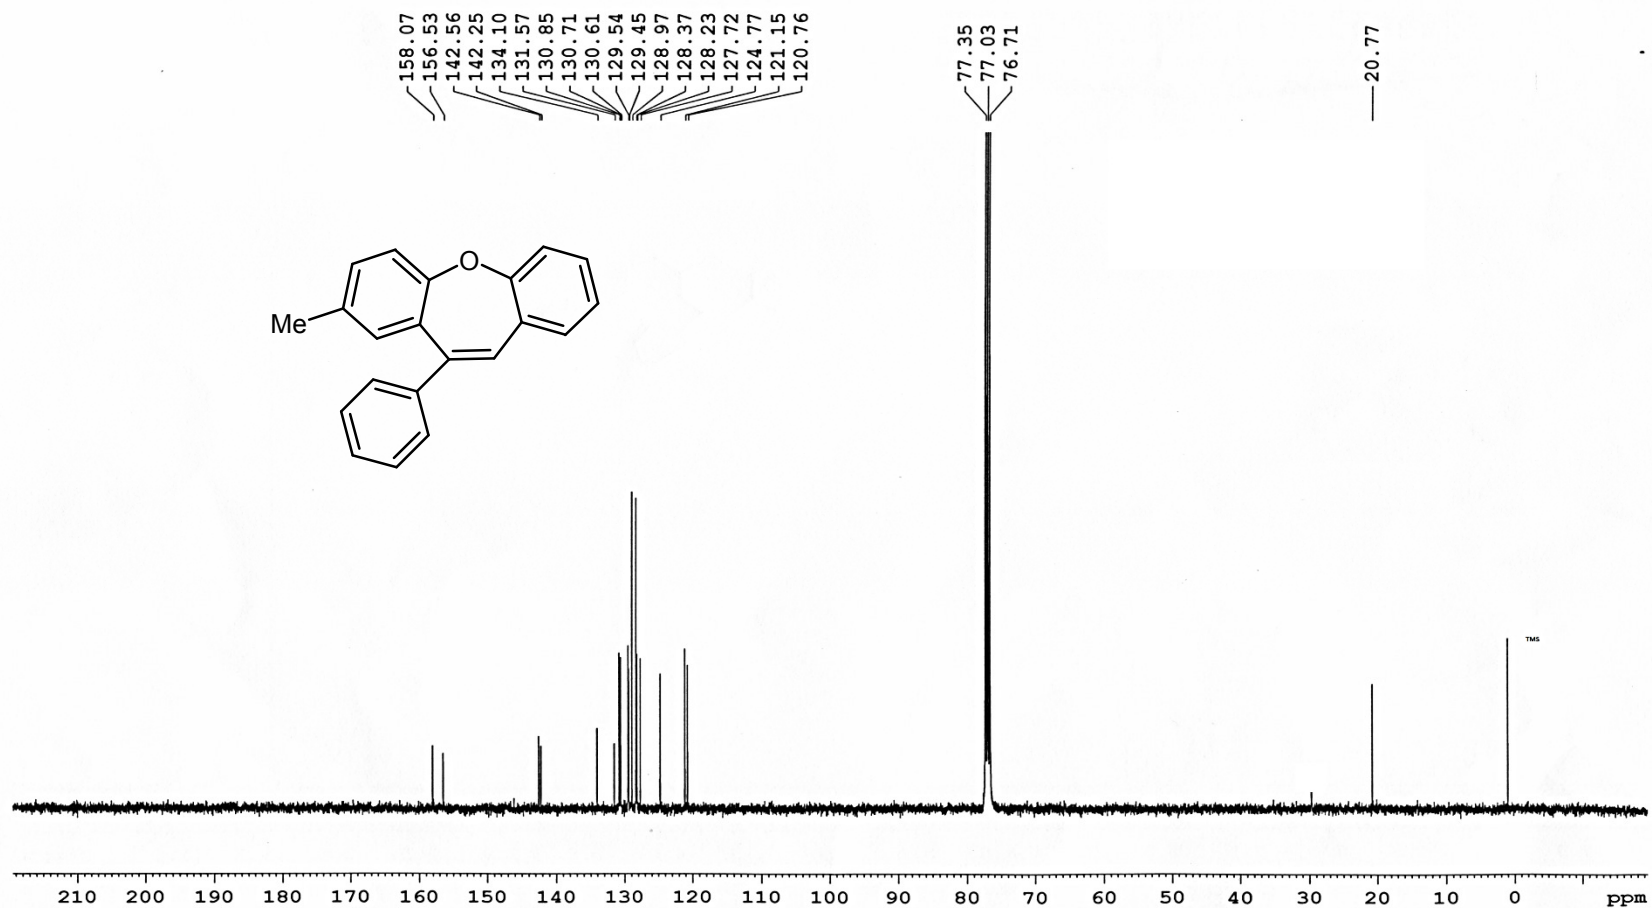



<sup>1</sup>H NMR of 2-Chloro-10-phenyldibenzo[*b,f*]oxepine (3q)

<sup>1</sup>H of NP-SO-805

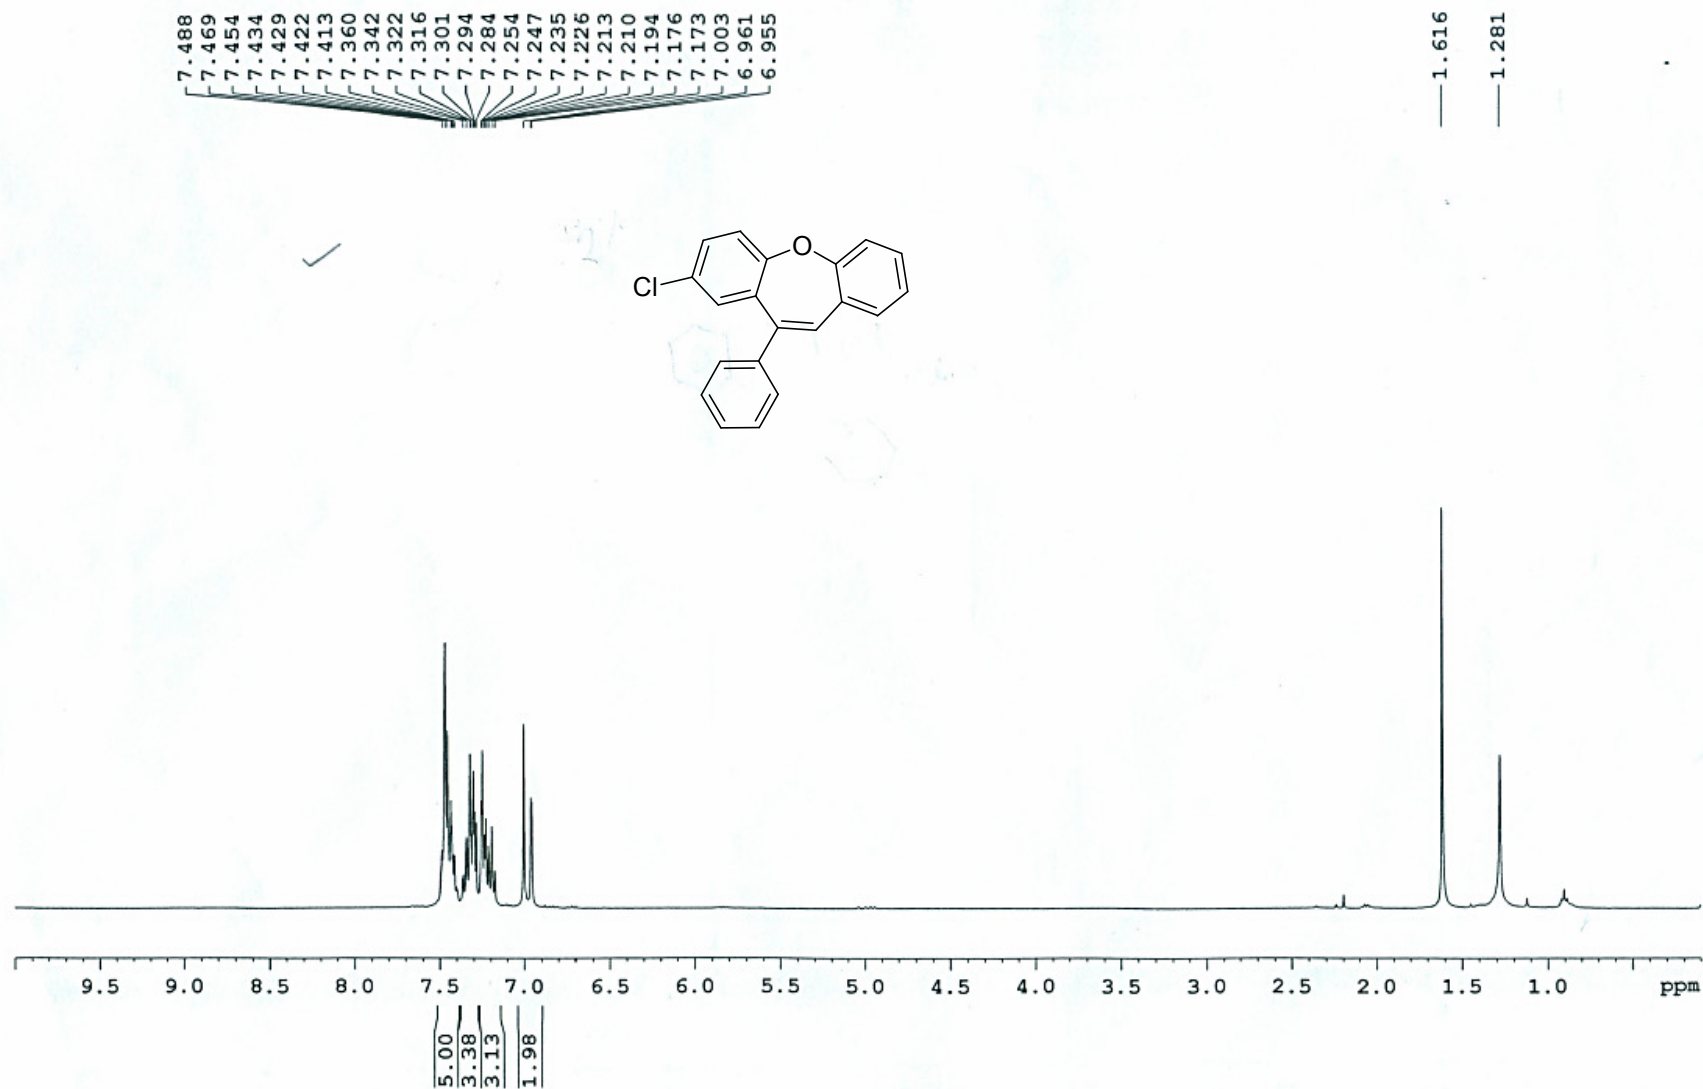

<sup>13</sup>C NMR of 2-Chloro-10-phenyldibenzo[*b,f*]oxepine (3q)

<sup>13</sup>C of NP-SO-805

9.8.2018

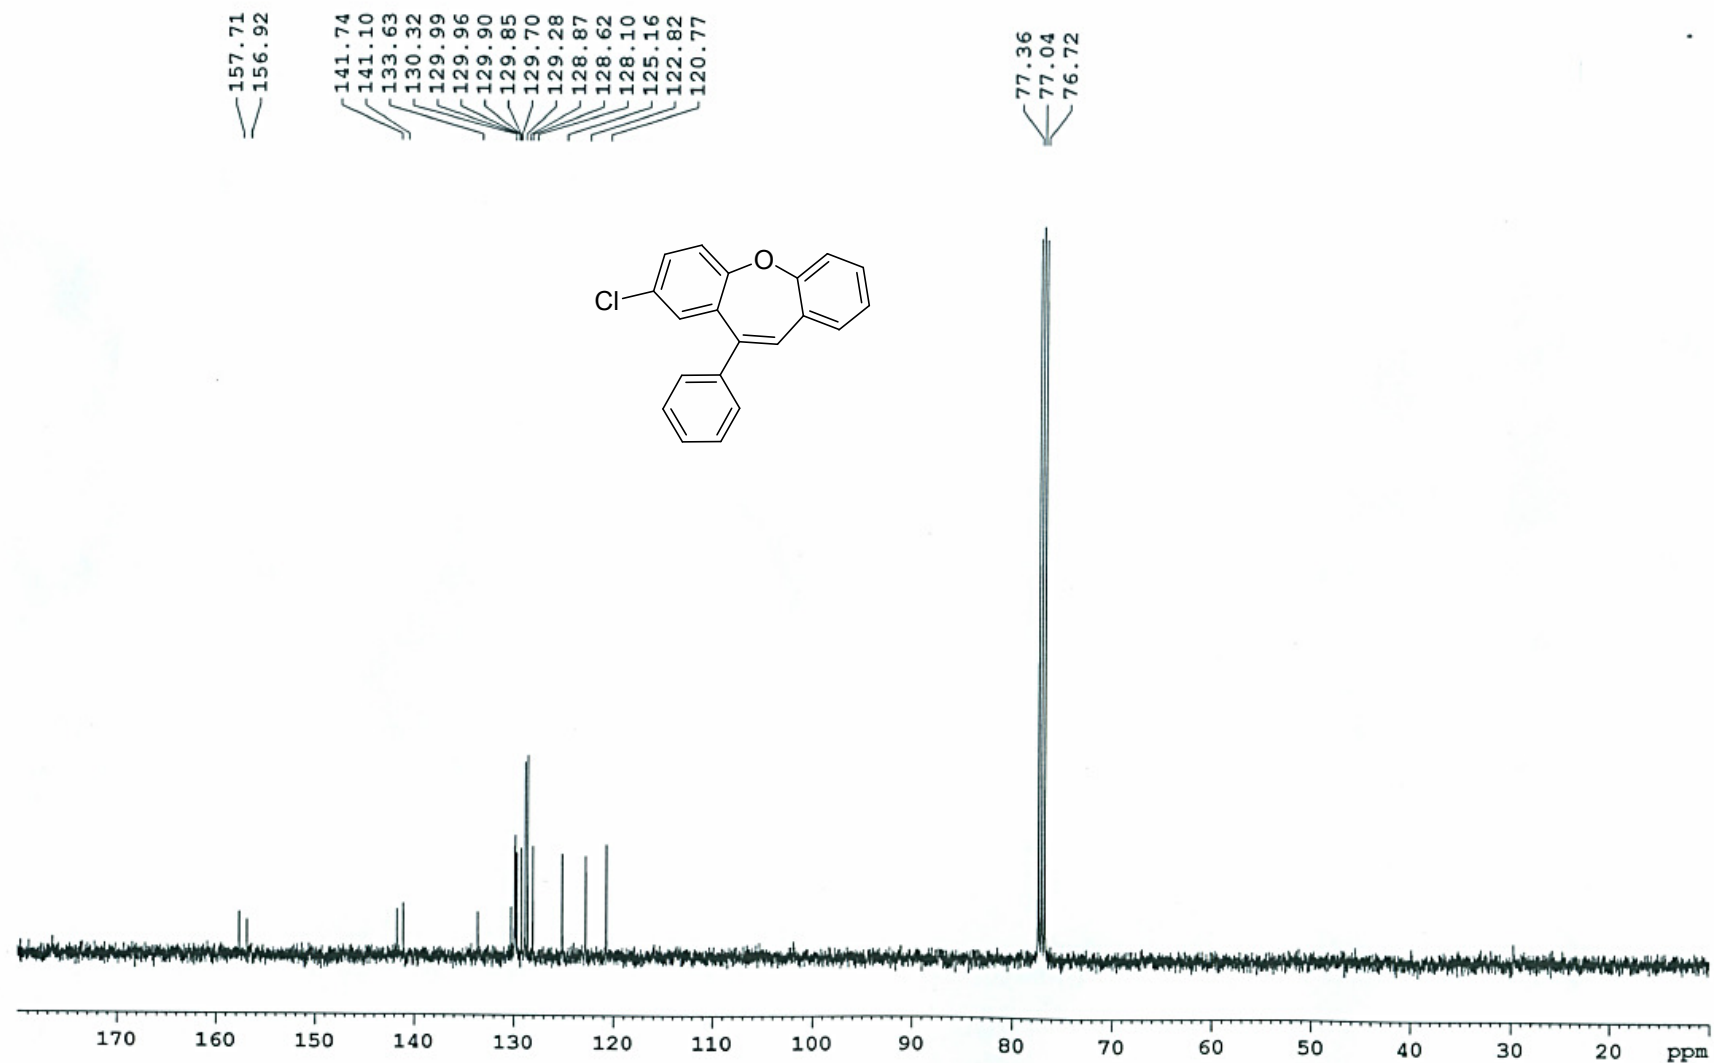

**<sup>1</sup>H NMR of 2-Methoxy-10-phenyldibenzo[*b,f*]oxepine (3r)**

<sup>1</sup>H of NP-SO-816 (R2)

23.8.2018

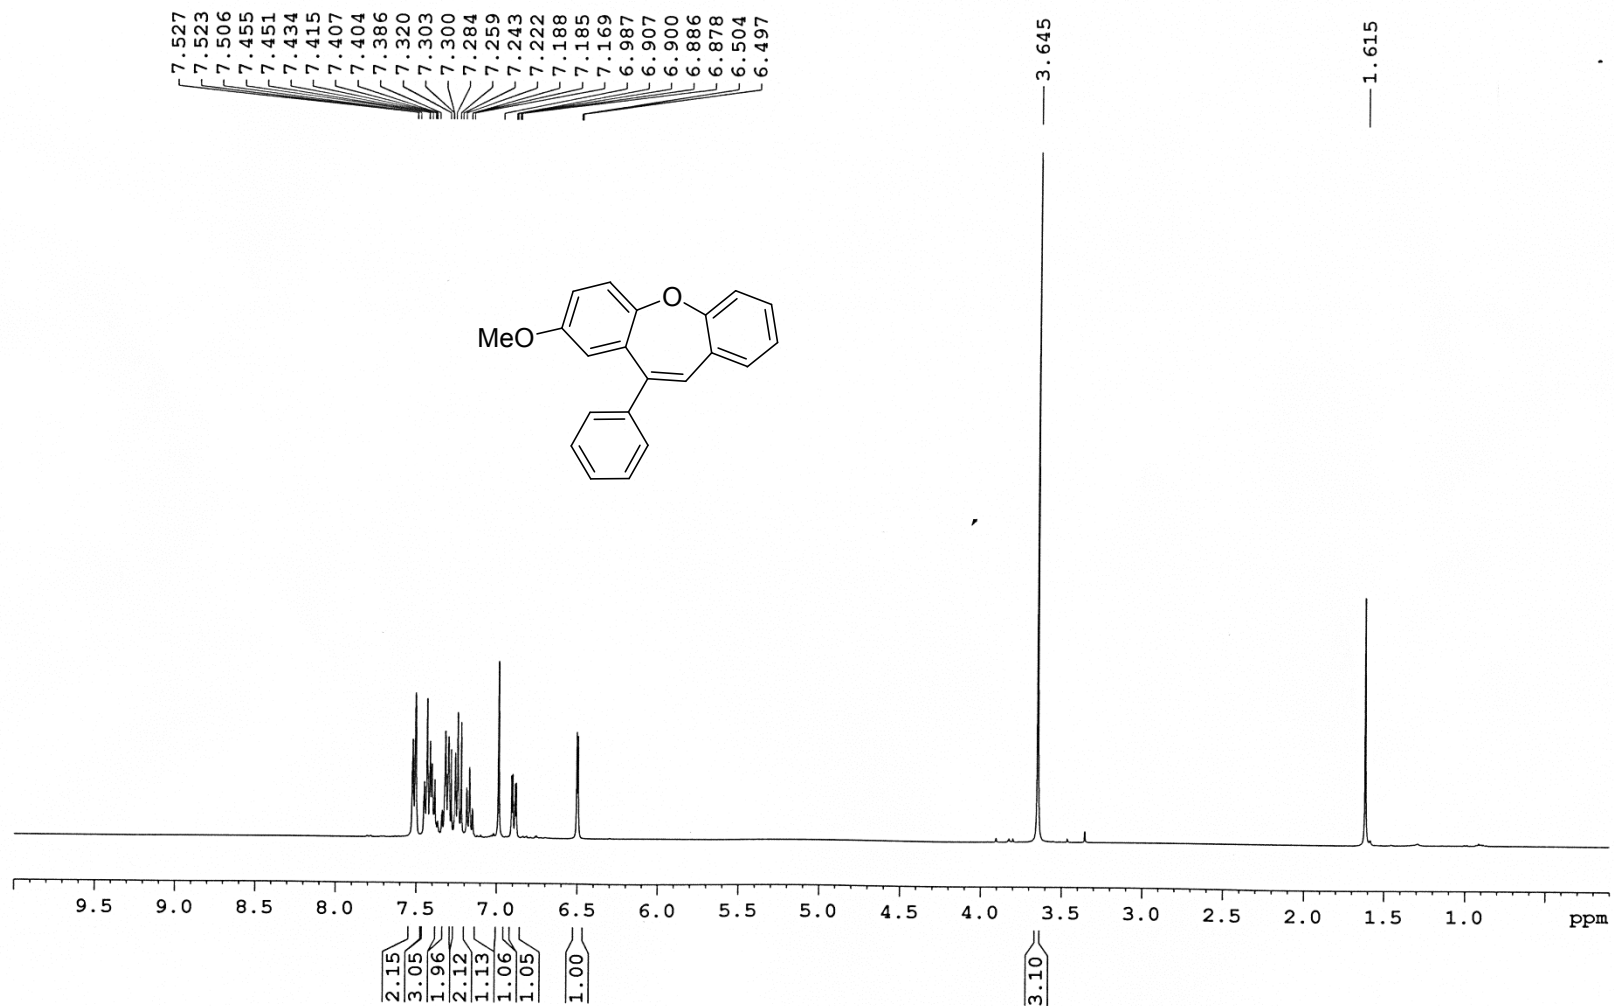

**$^{13}\text{C}$  NMR of 2-Methoxy-10-phenyldibenzo[*b,f*]oxepine (3r)**

$^{13}\text{C}$  of NP-SO-816(R2) 24.8.2018

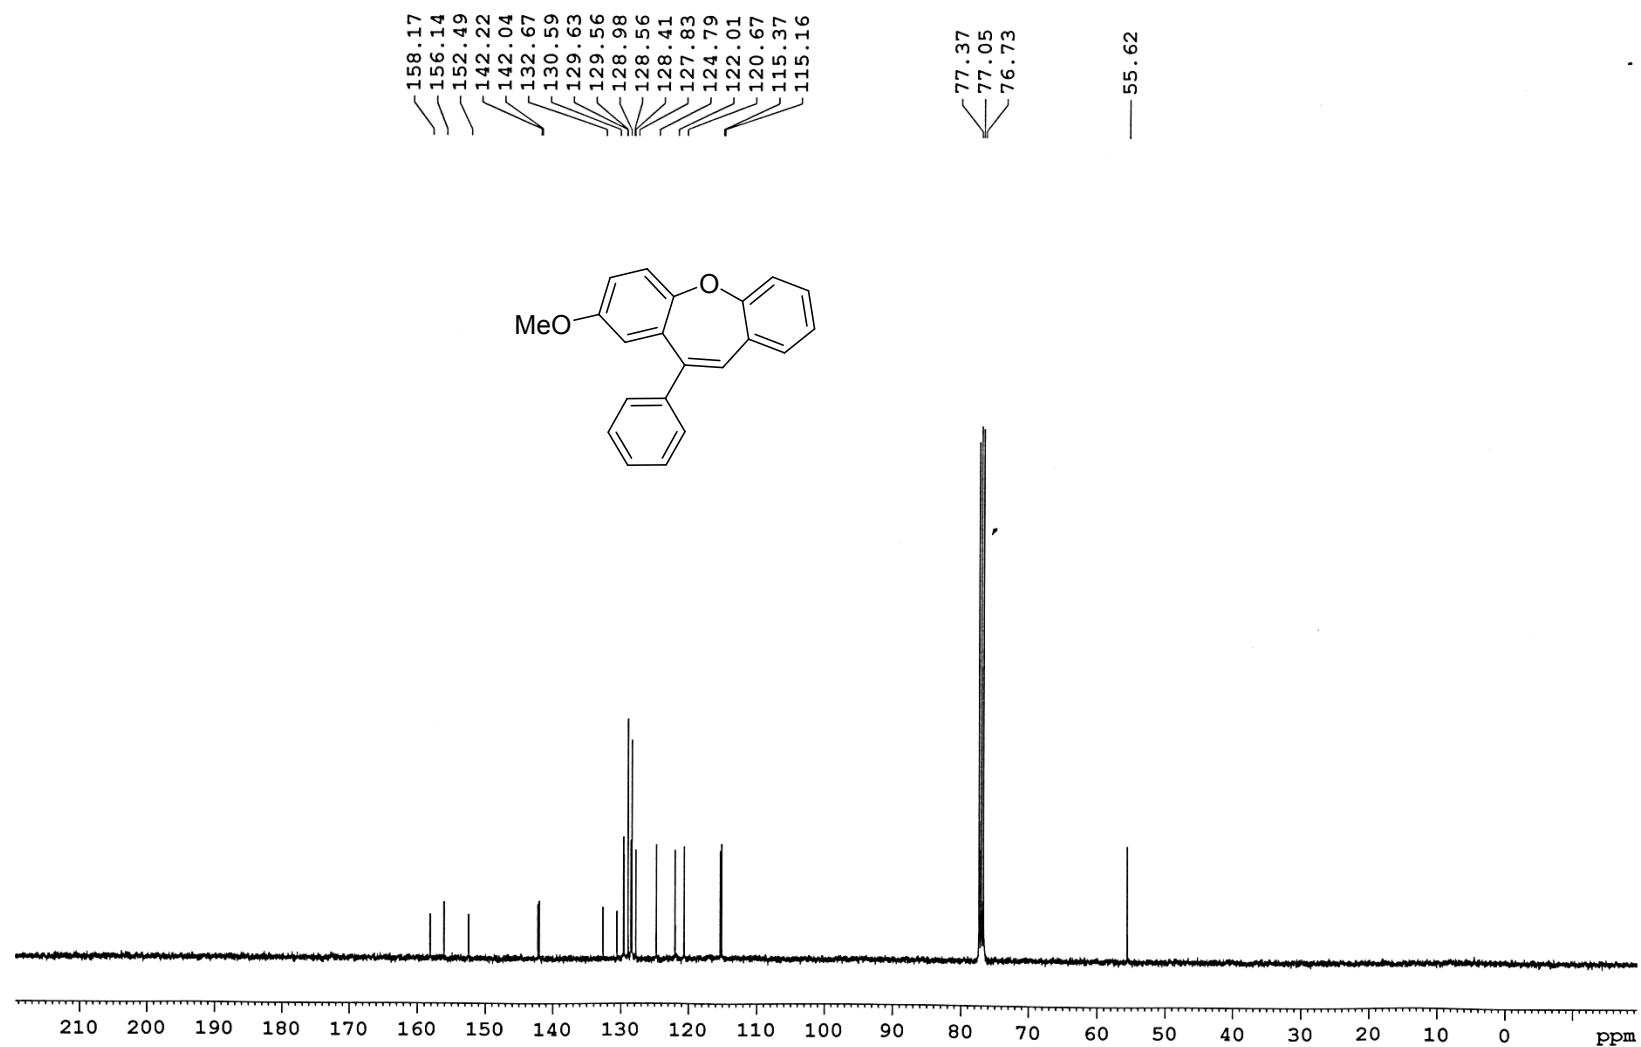

**$^1\text{H}$  NMR of 11-Phenyl benzo[*b*]naphth[1,2-*f*]oxepin (3s)**

$^1\text{H}$  of NP-SO-813-S2 15.8.2018

(3s)

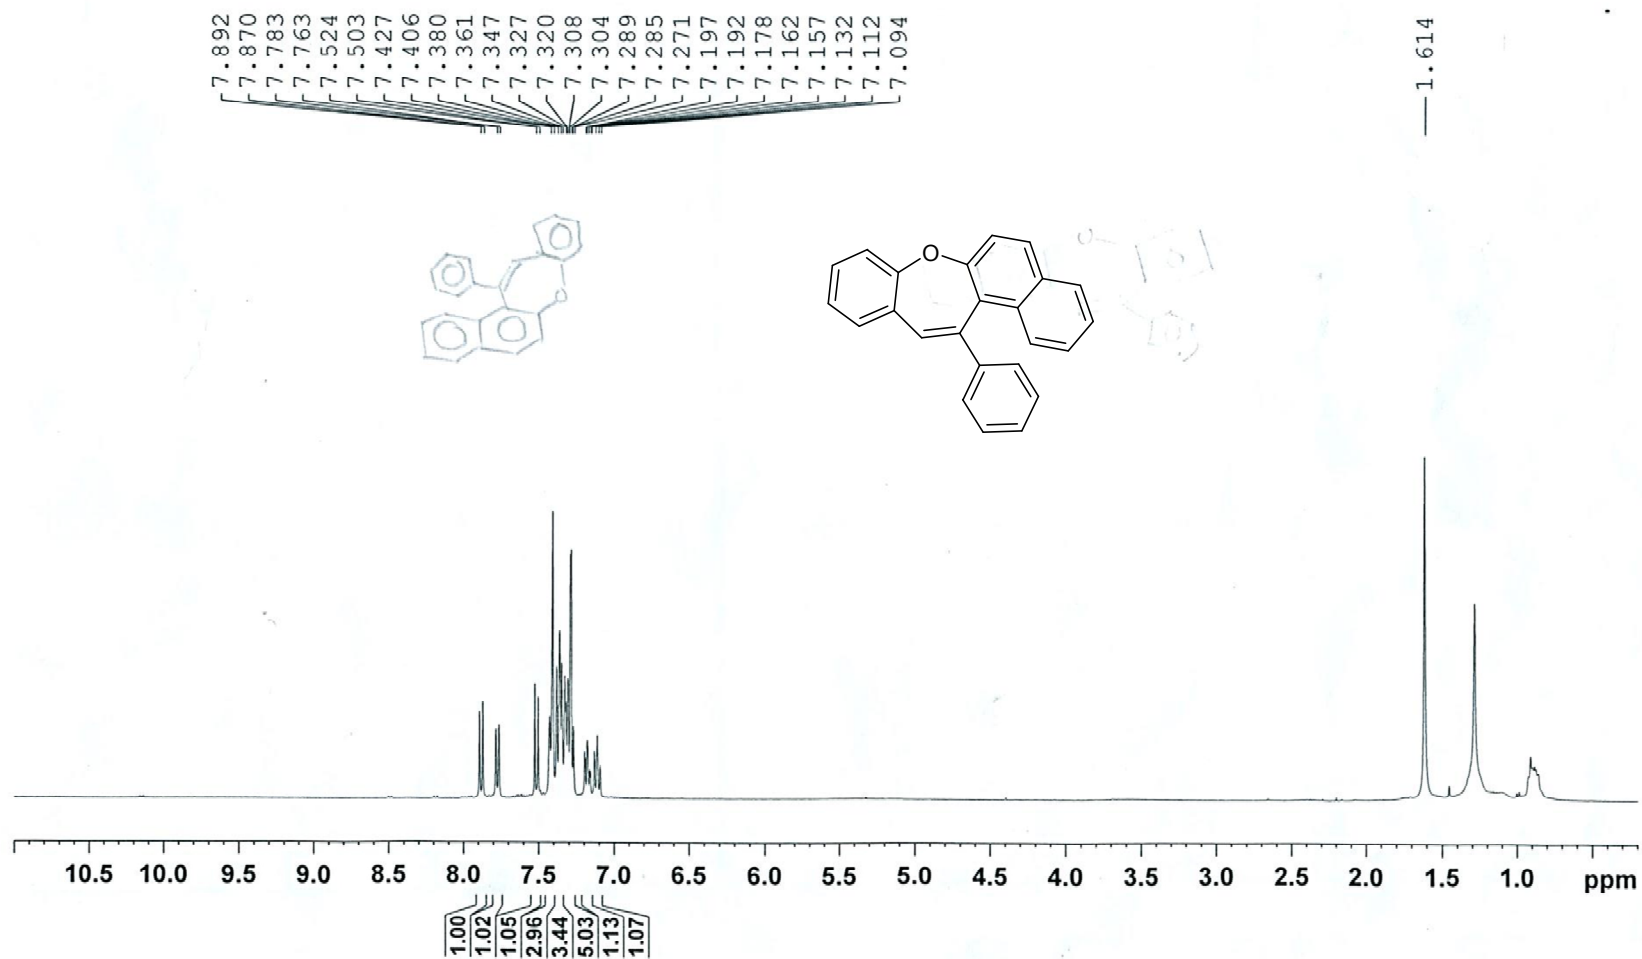

**$^{13}\text{C}$  NMR of 11-Phenyl benzo[*b*]naphth[1,2-*f*]oxepin (3s)**

$^{13}\text{C}$  of NP-SO-813-S2 15.8.2018

38

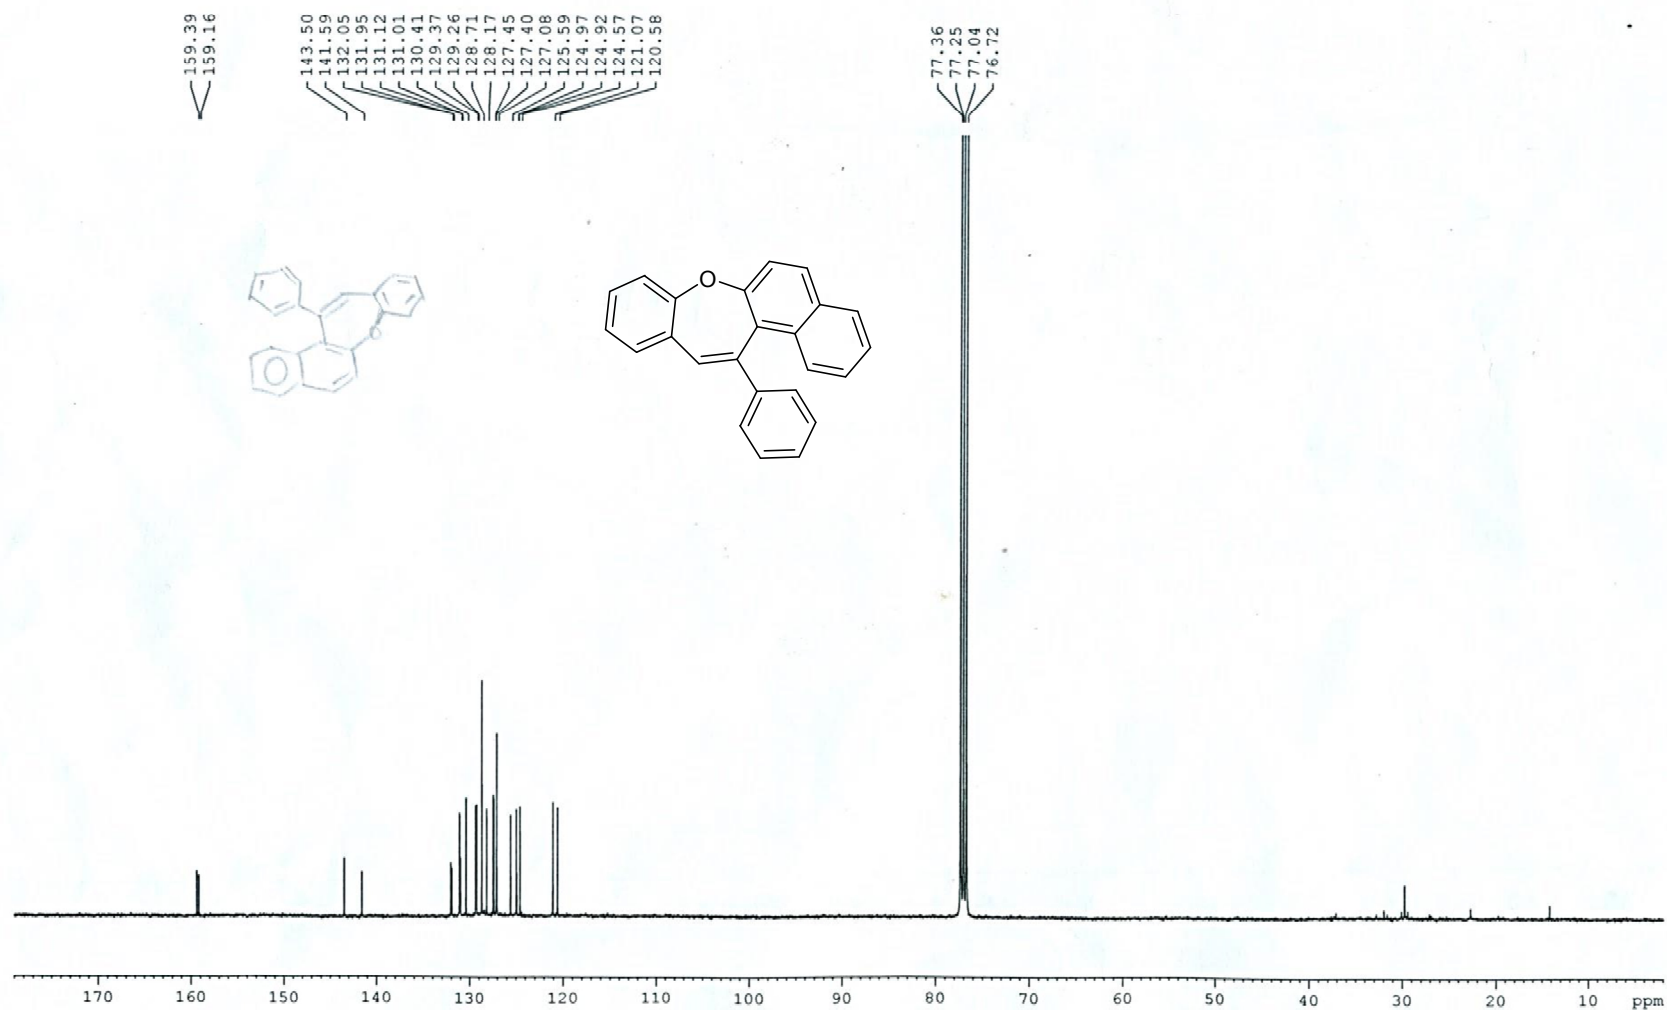

<sup>1</sup>H NMR of 12-Phenyl benzo[*b*]naphth[2,1-*f*]oxepin (3t)

<sup>1</sup>H of NP-SO-814-R 18.8.2018

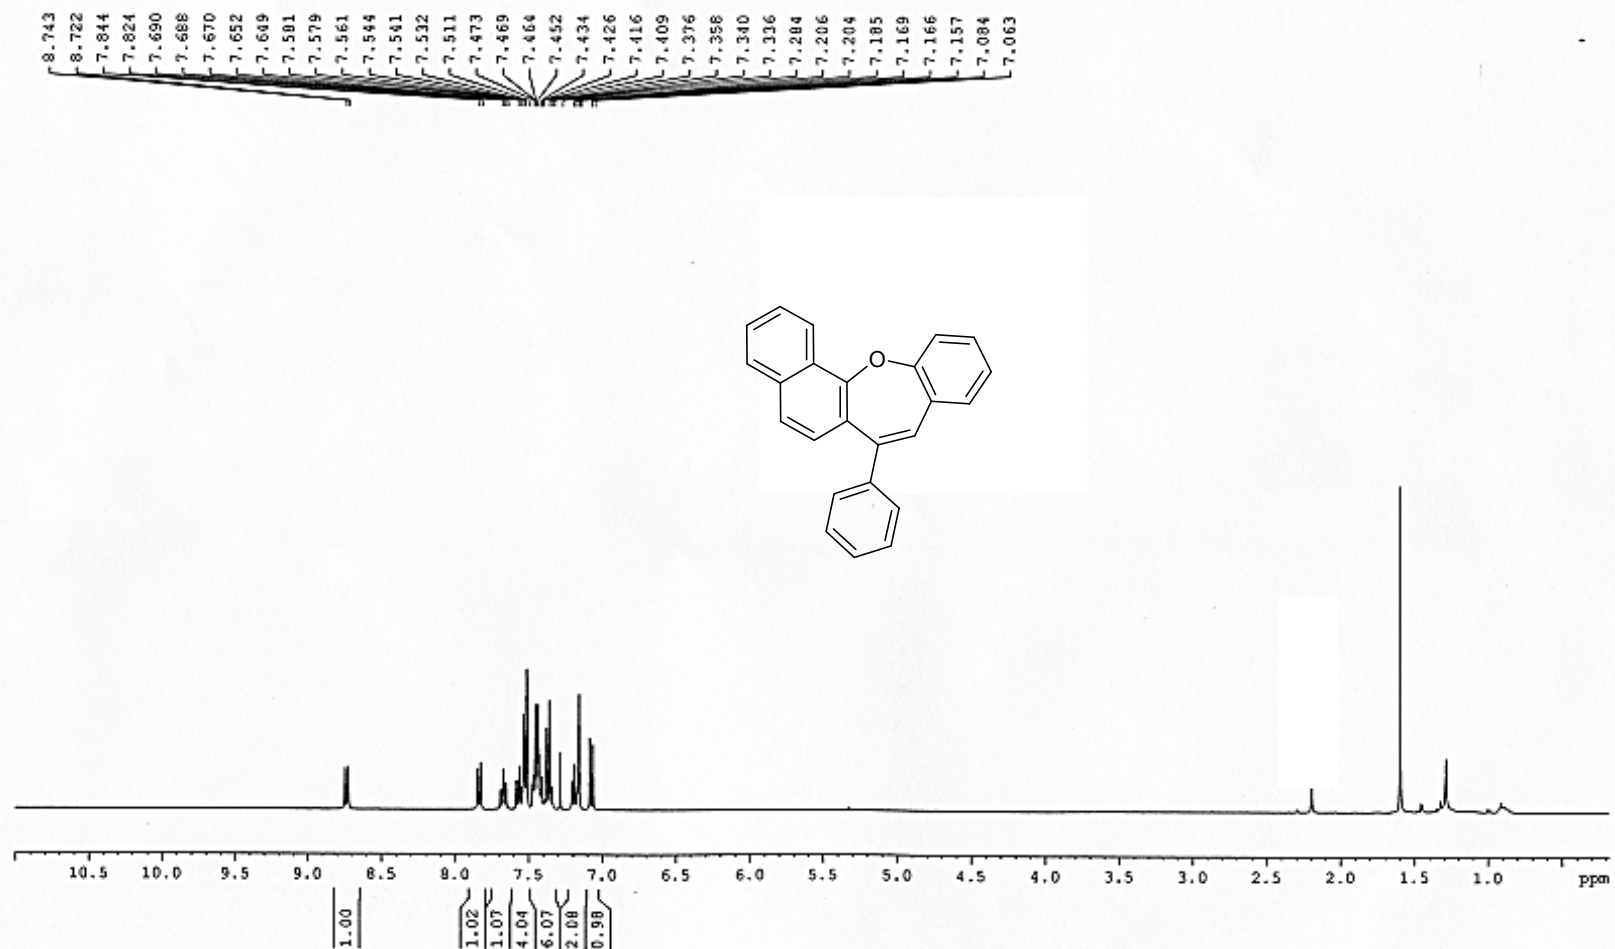

13 NMR of 12-Phenyl benzo[*b*]naphth[2,1-*f*]oxepin (3t)

13C of NP-SO-814-R 18.8.2018

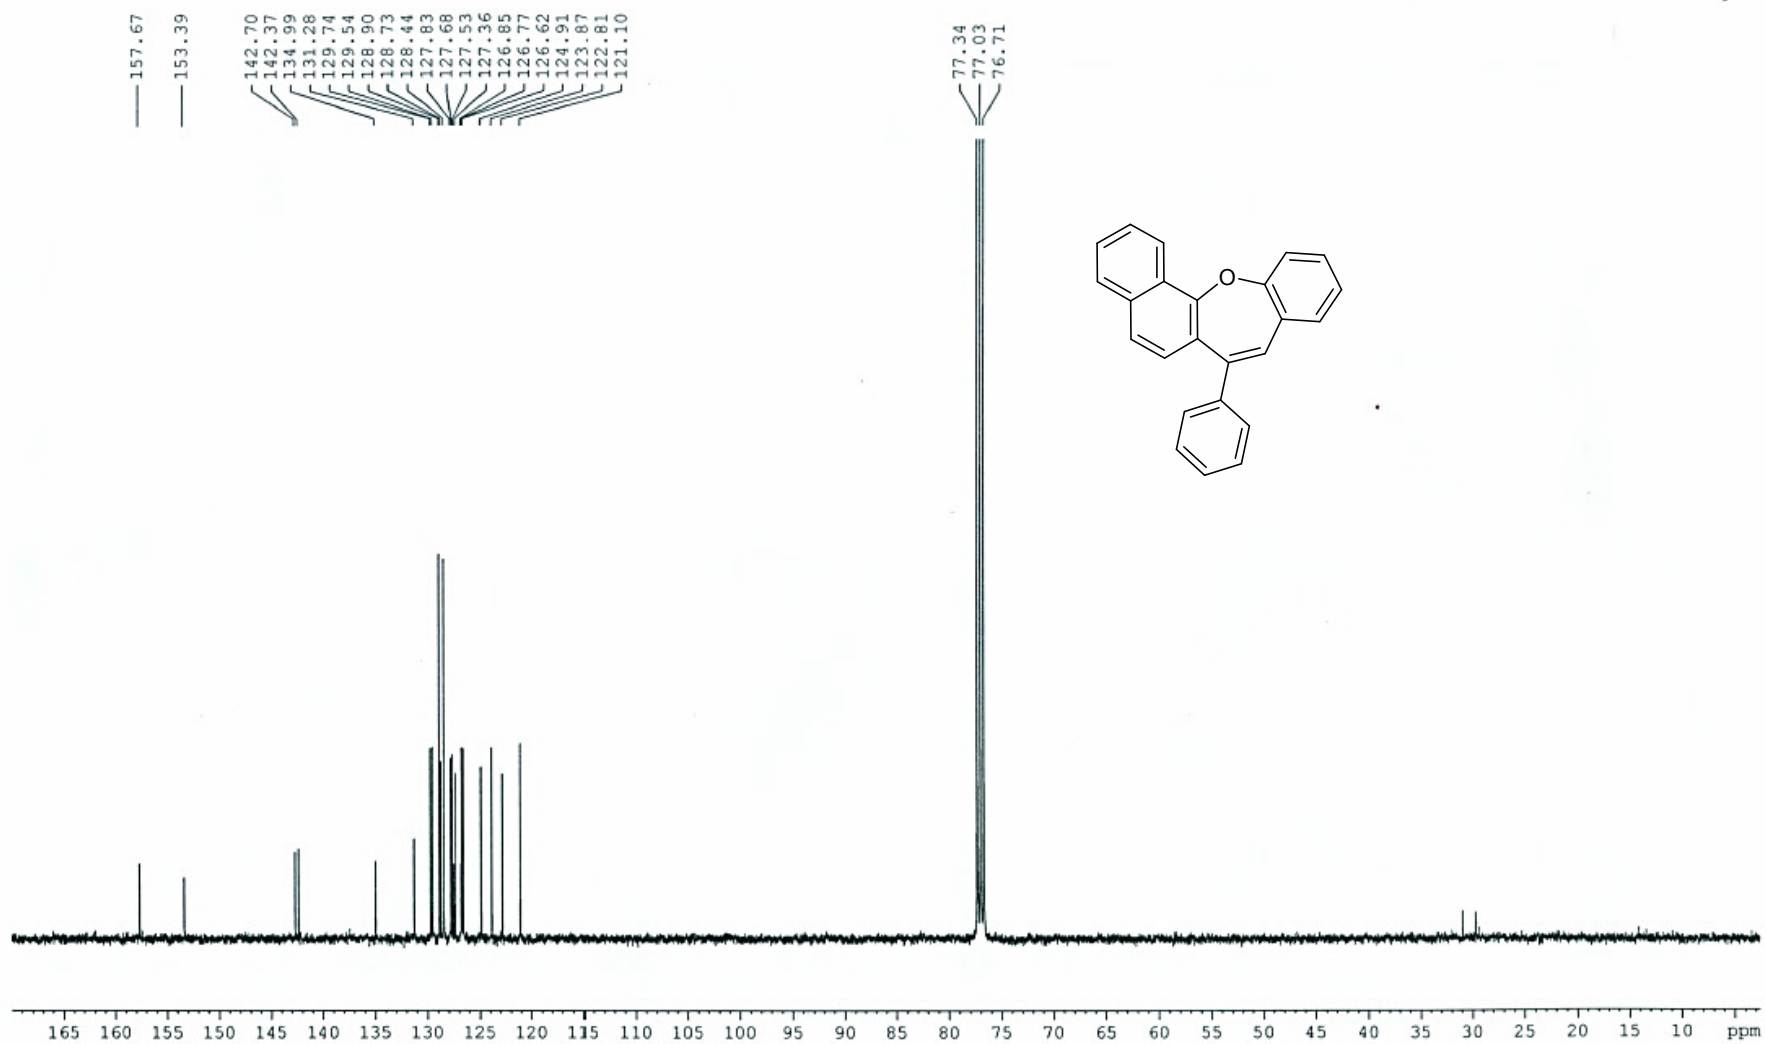



**<sup>1</sup>H NMR of 4-phenoxy-3-(phenylethynyl)-2H-chromen-2-one (5a)**

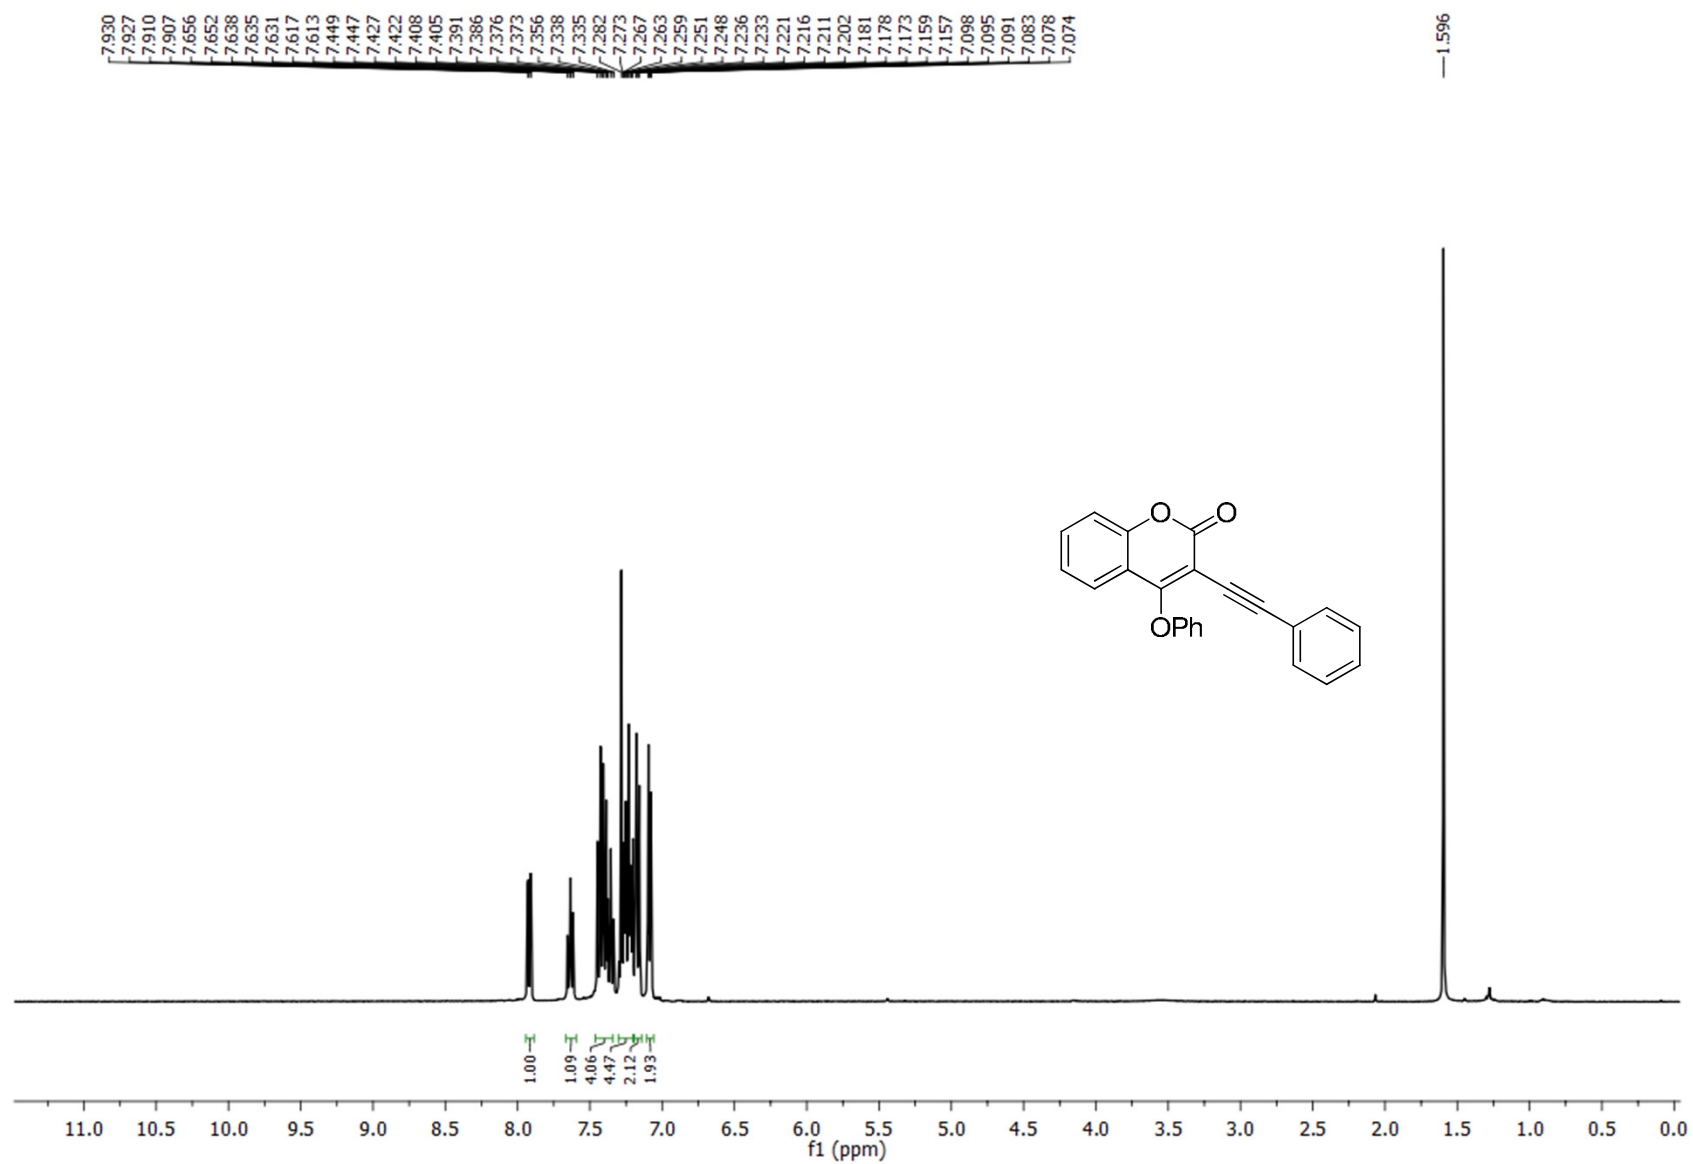

<sup>13</sup>C NMR of 4-phenoxy-3-(phenylethynyl)-2H-chromen-2-one (5a)

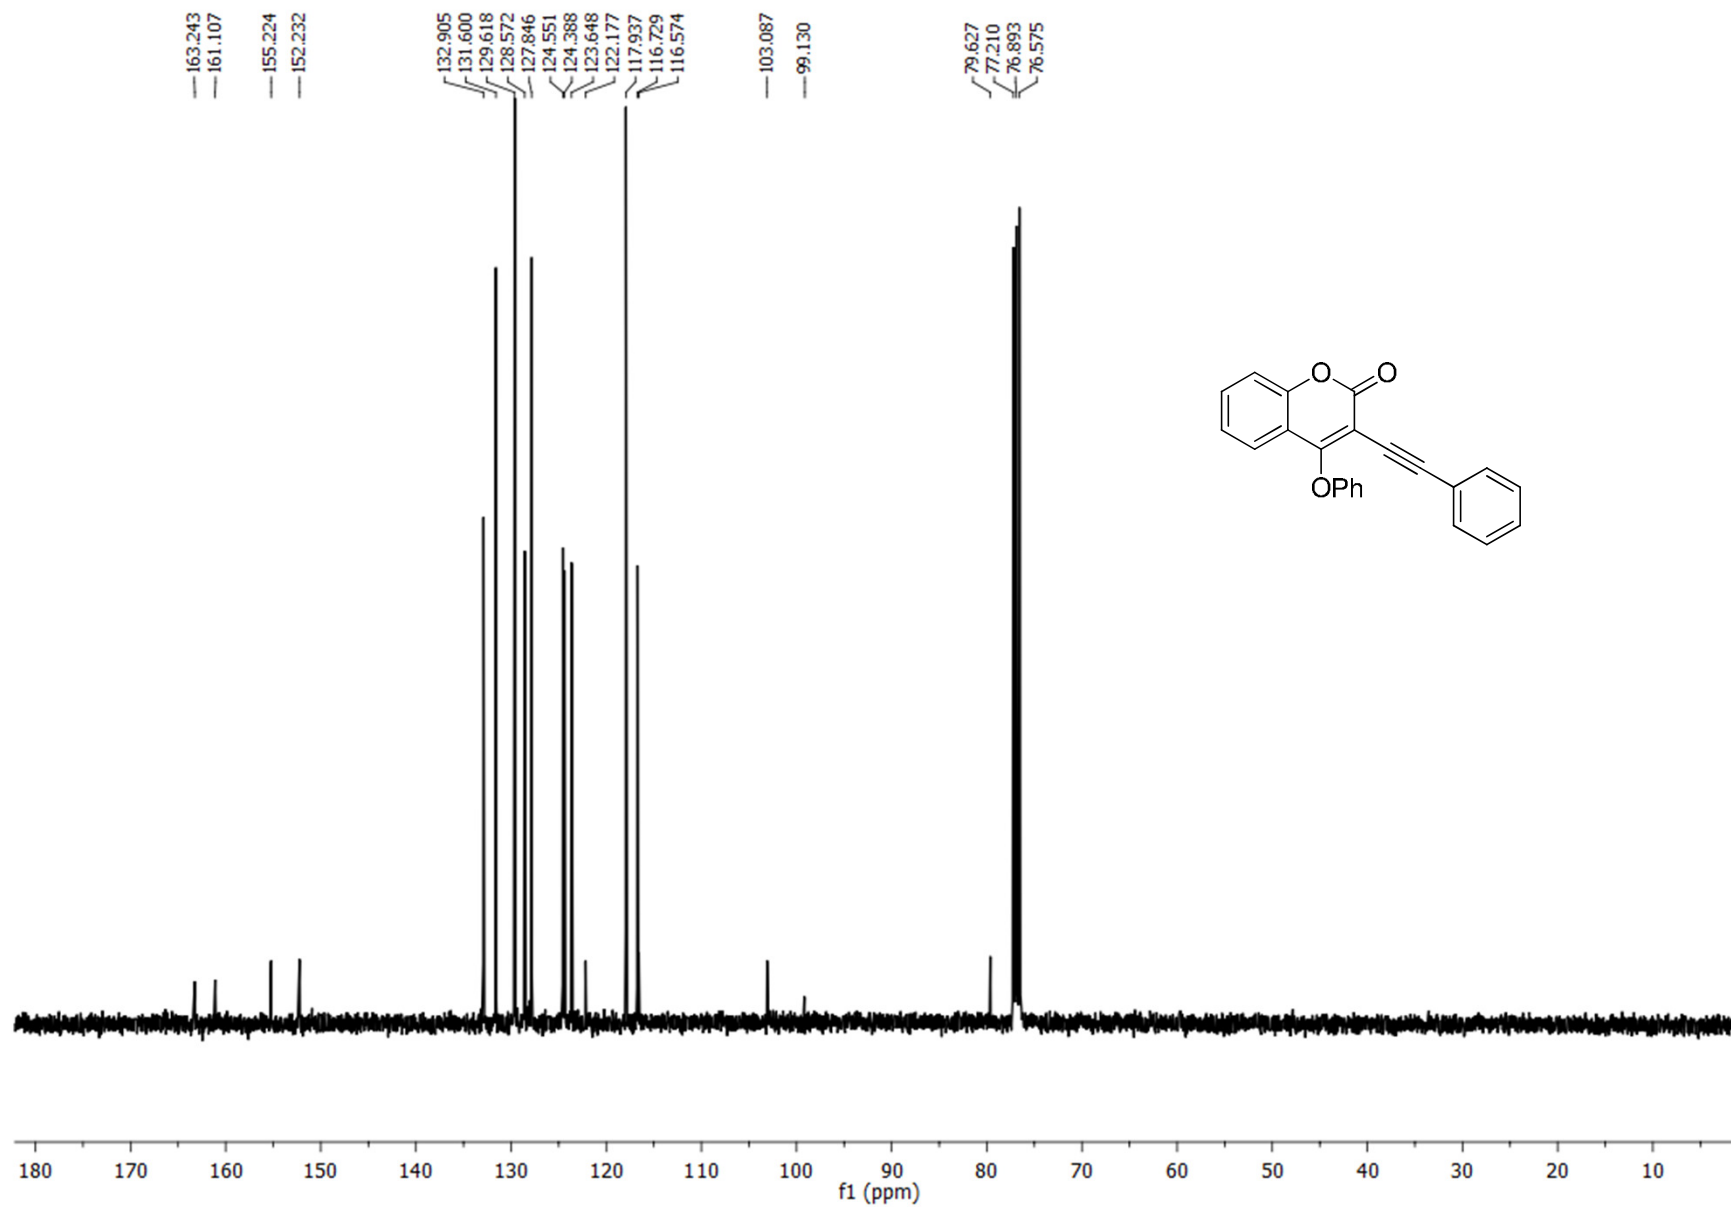

**<sup>1</sup>H NMR of 8-methyl-4-phenoxy-3-(phenylethynyl)-2H-chromen-2-one (5b)**

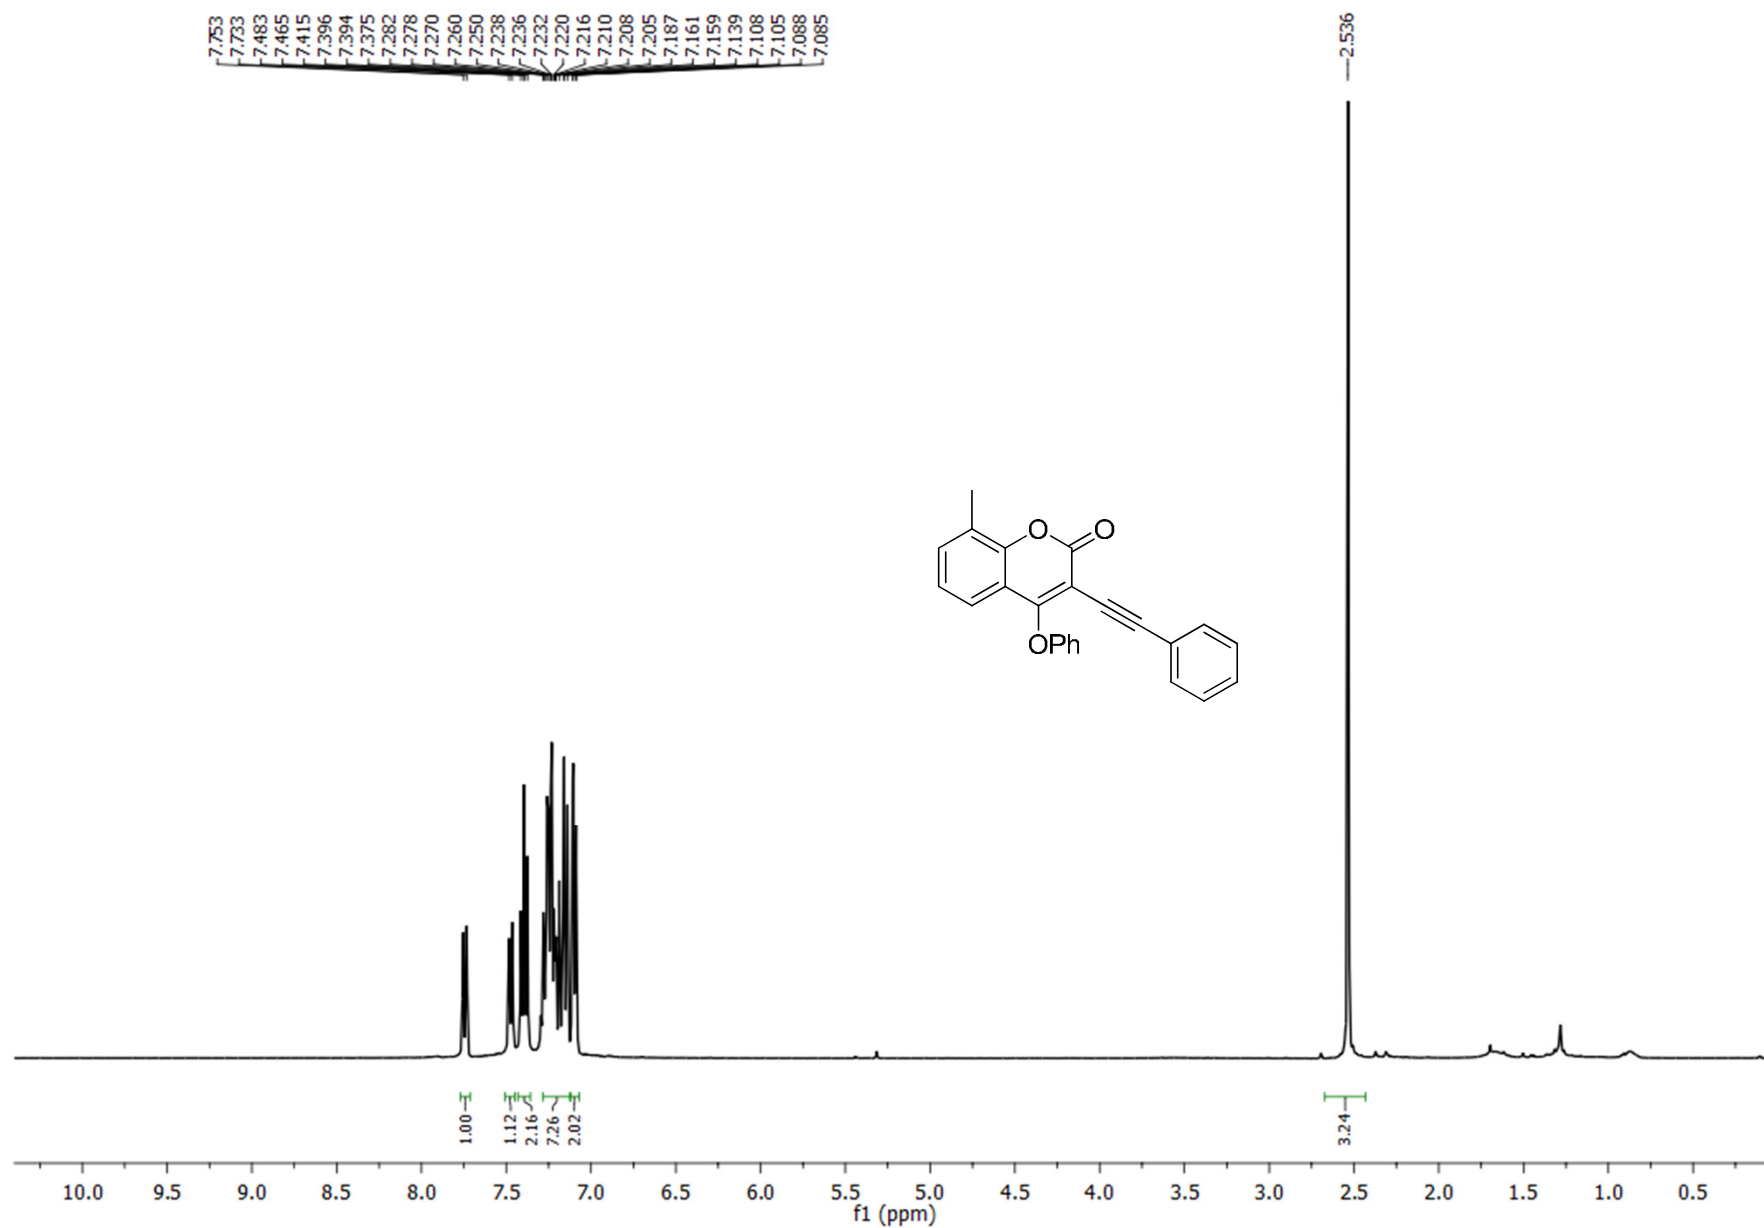

**<sup>13</sup>C NMR of 8-methyl-4-phenoxy-3-(phenylethynyl)-2H-chromen-2-one (5b)**

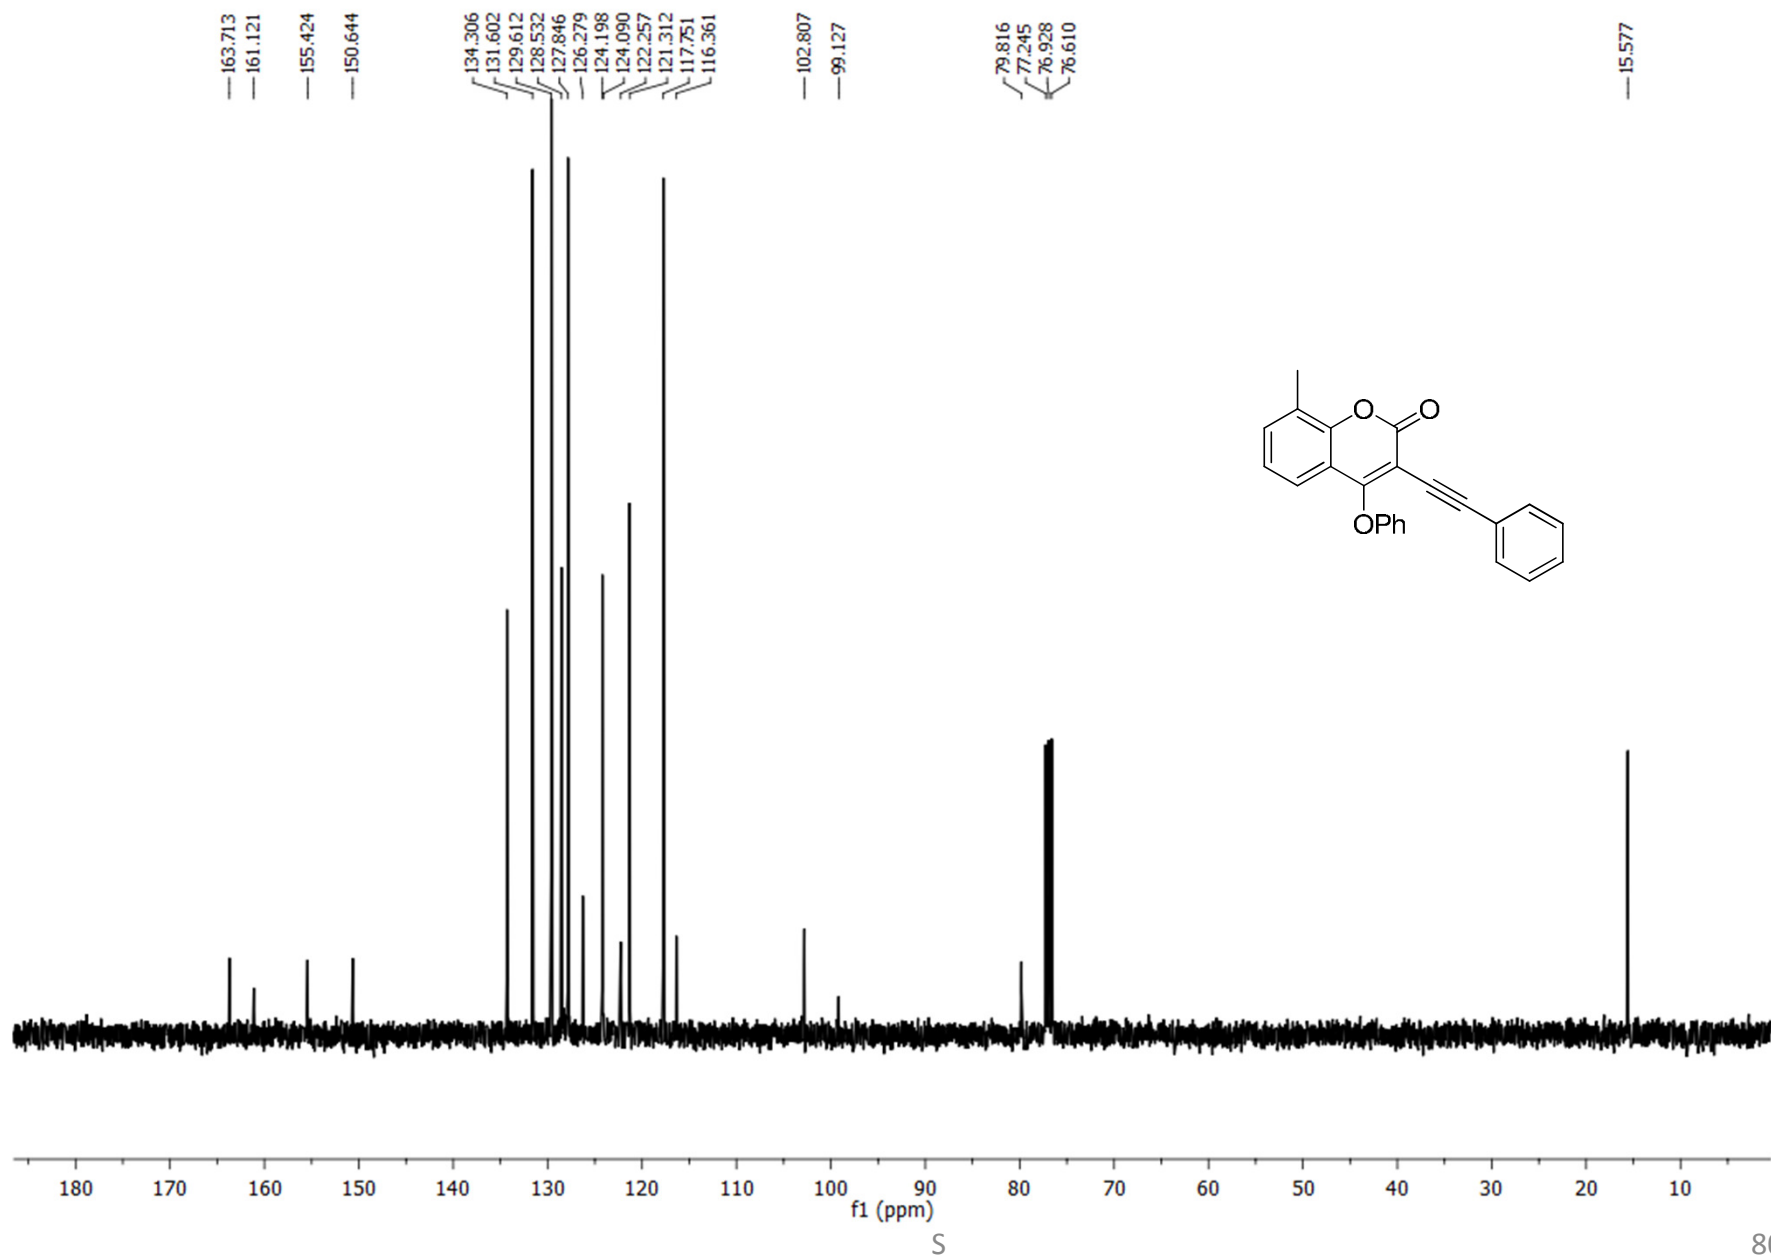

**$^1\text{H}$  NMR of 7-methyl-4-phenoxy-3-(phenylethynyl)-2H-chromen-2-one (5c)**

19.4.2018

$^1\text{H}$  of NP-IM-SON-mCresol-4HC 19.4.2018

7.778  
7.761  
7.473  
7.456  
7.412  
7.393  
7.373  
7.281  
7.268  
7.242  
7.223  
7.206  
7.186  
7.160  
7.139  
7.092  
7.073  
7.049

2.688  
2.503

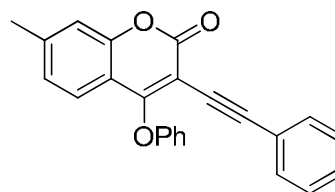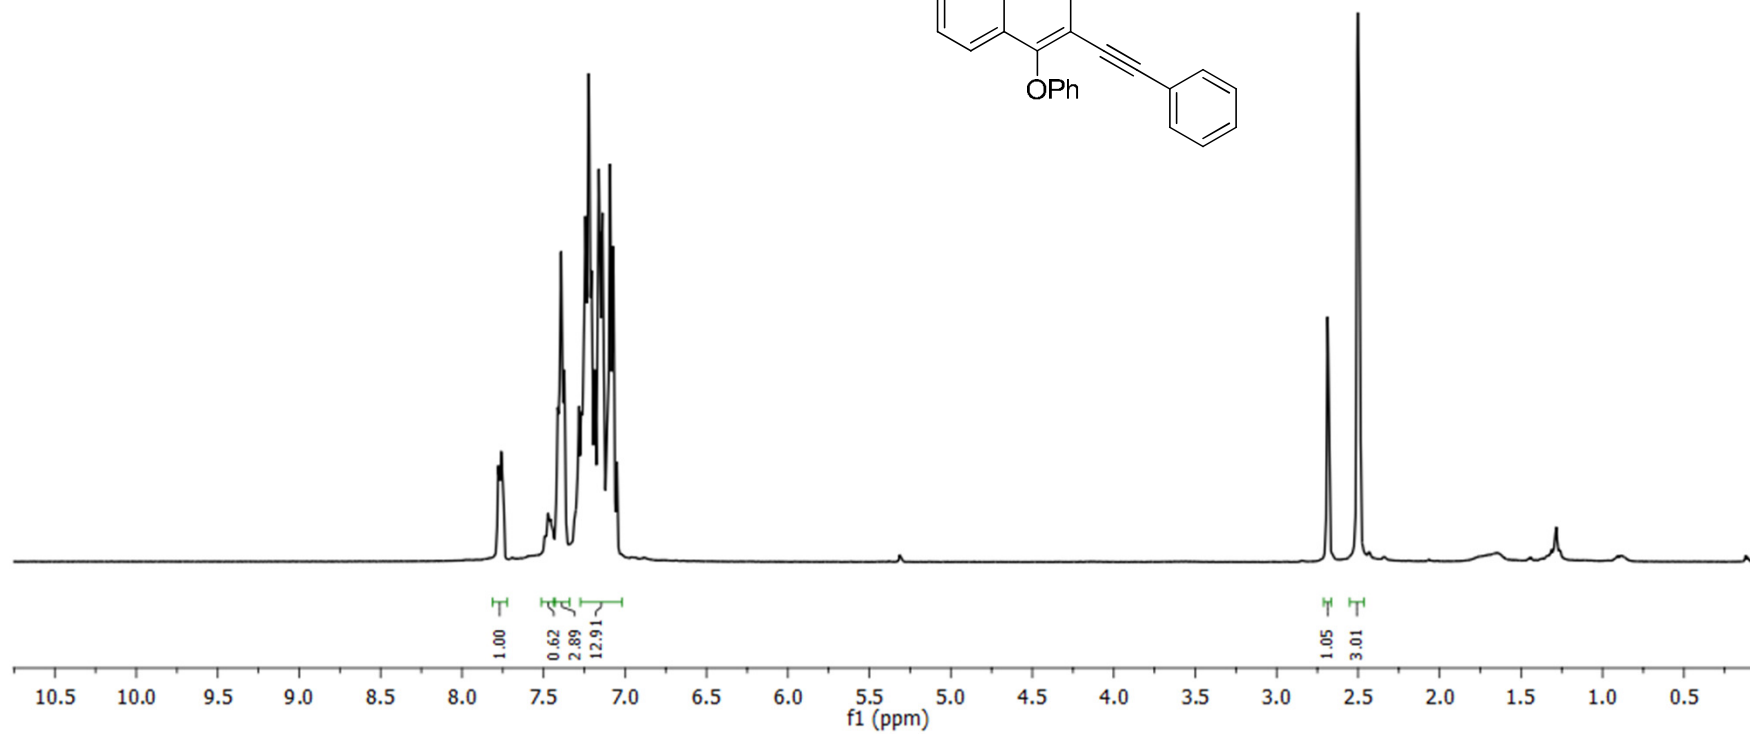

**<sup>13</sup>C NMR of 7-methyl-4-phenoxy-3-(phenylethynyl)-2H-chromen-2-one (5c)**

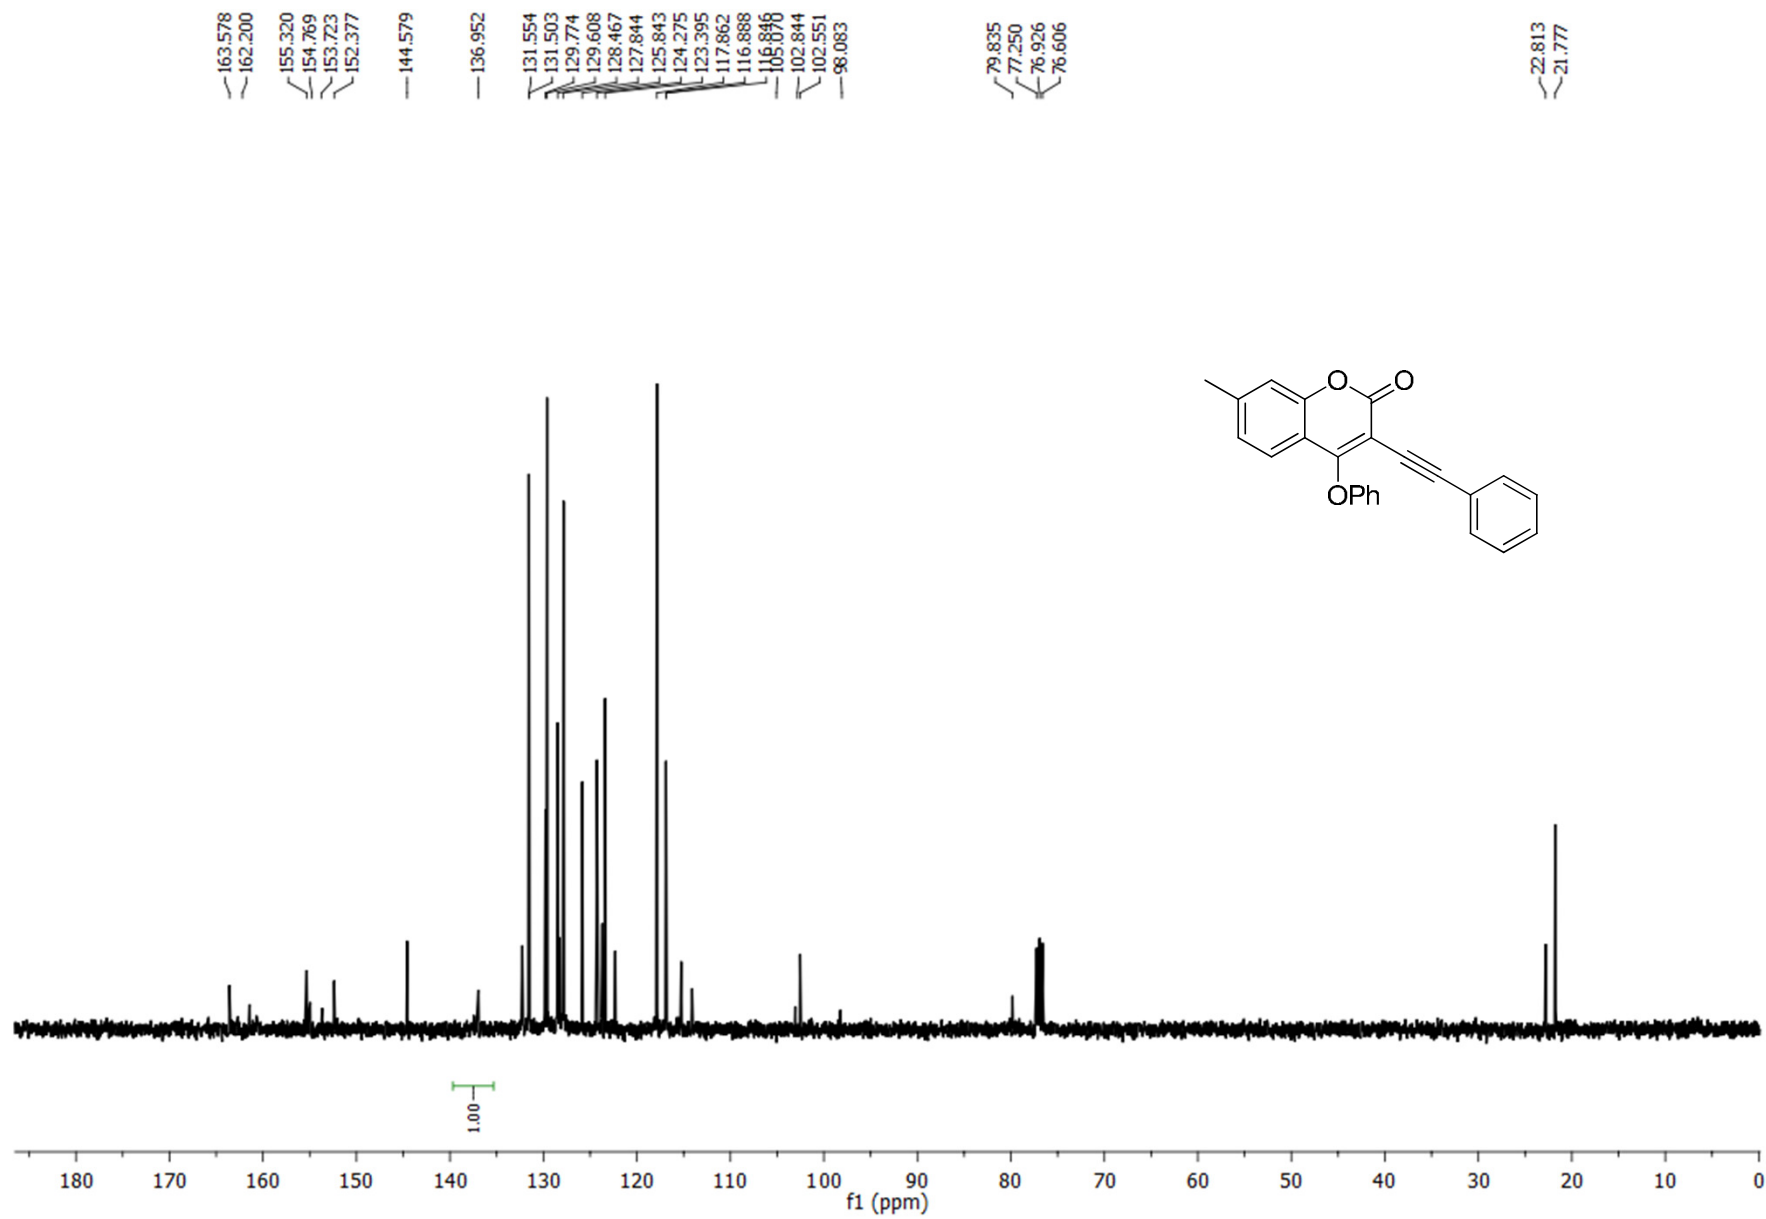

**<sup>1</sup>H NMR of 6-methyl-4-phenoxy-3-(phenylethynyl)-2H-chromen-2-one (5d)**

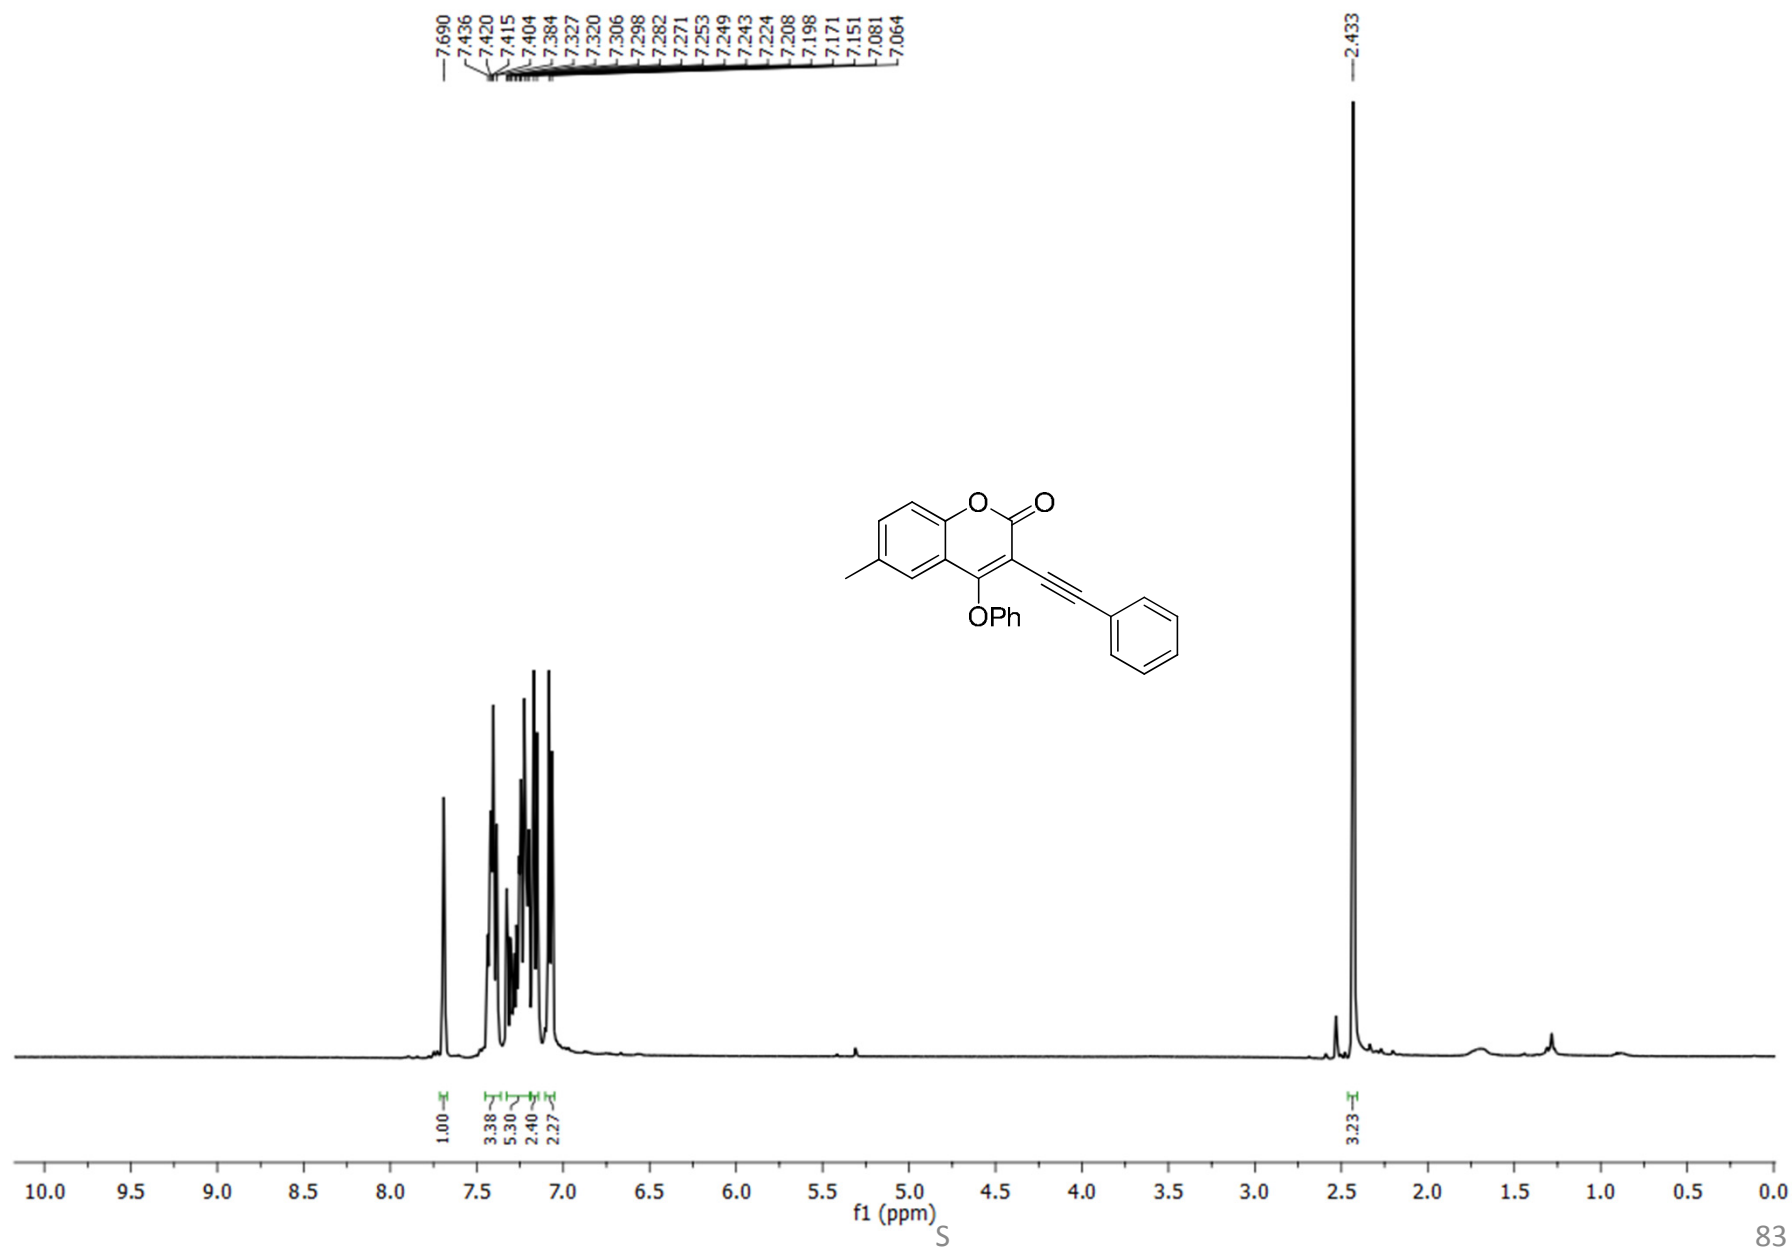

**<sup>13</sup>C NMR of 6-methyl-4-phenoxy-3-(phenylethynyl)-2H-chromen-2-one (5d)**

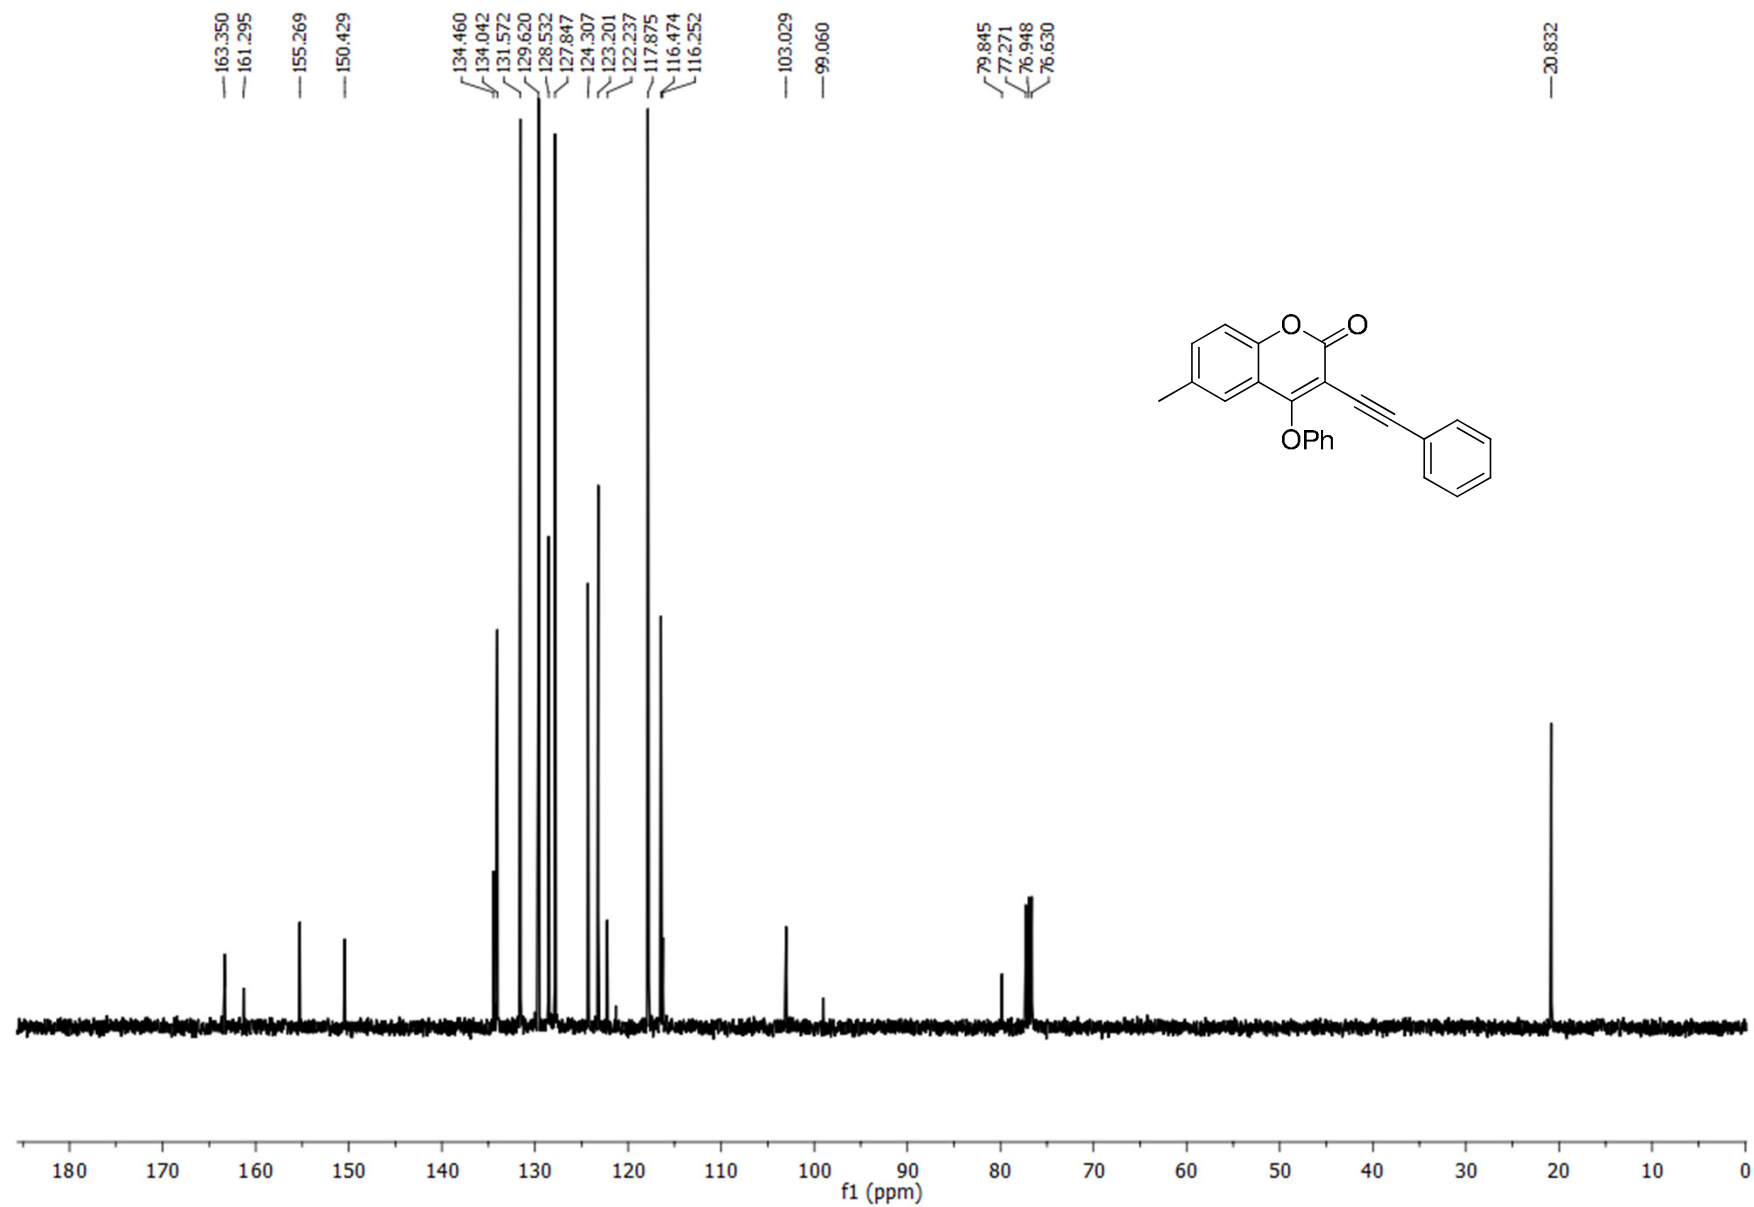



**<sup>1</sup>H NMR of 7-(benzyloxy)-4-phenoxy-3-(phenylethynyl)-2H-chromen-2-one (5e)**

13.4.2018

1H of NP-IM-SON-3OBr4HC

13.4.2018

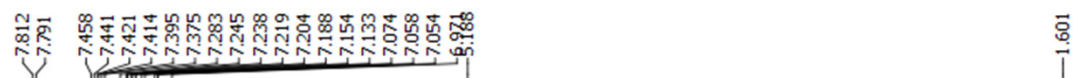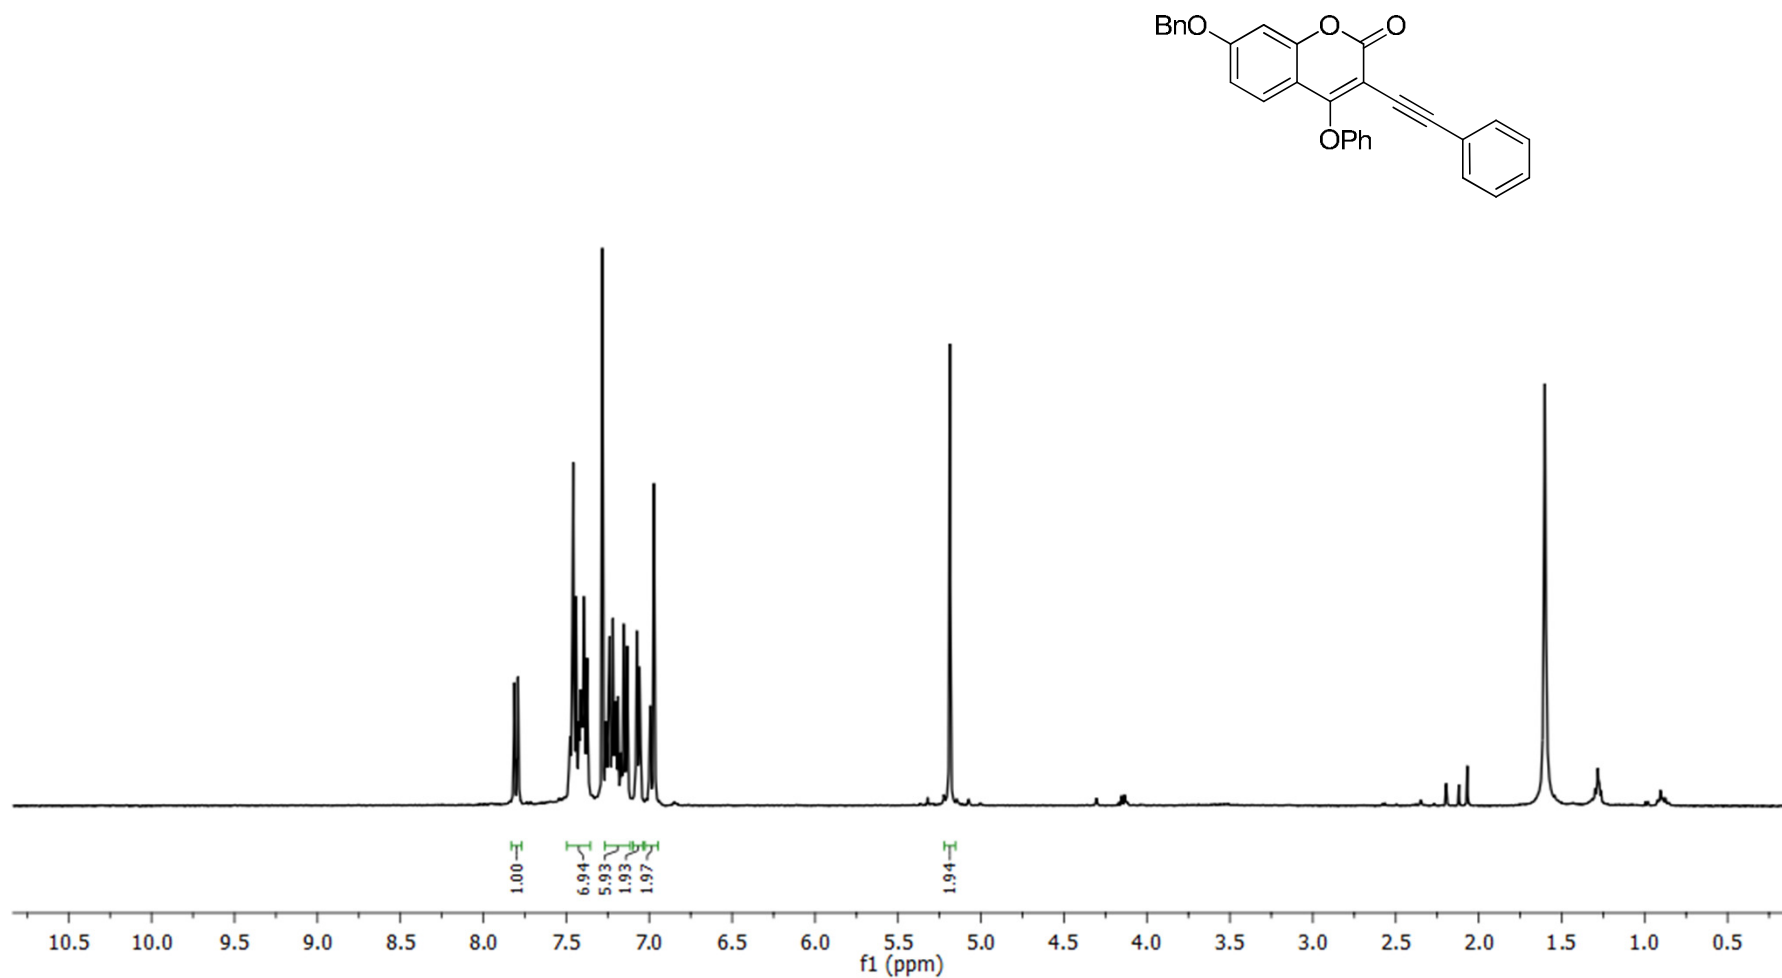

S

**$^{13}\text{C}$  NMR of 7-(benzyloxy)-4-phenoxy-3-(phenylethynyl)-2H-chromen-2-one (5e)**

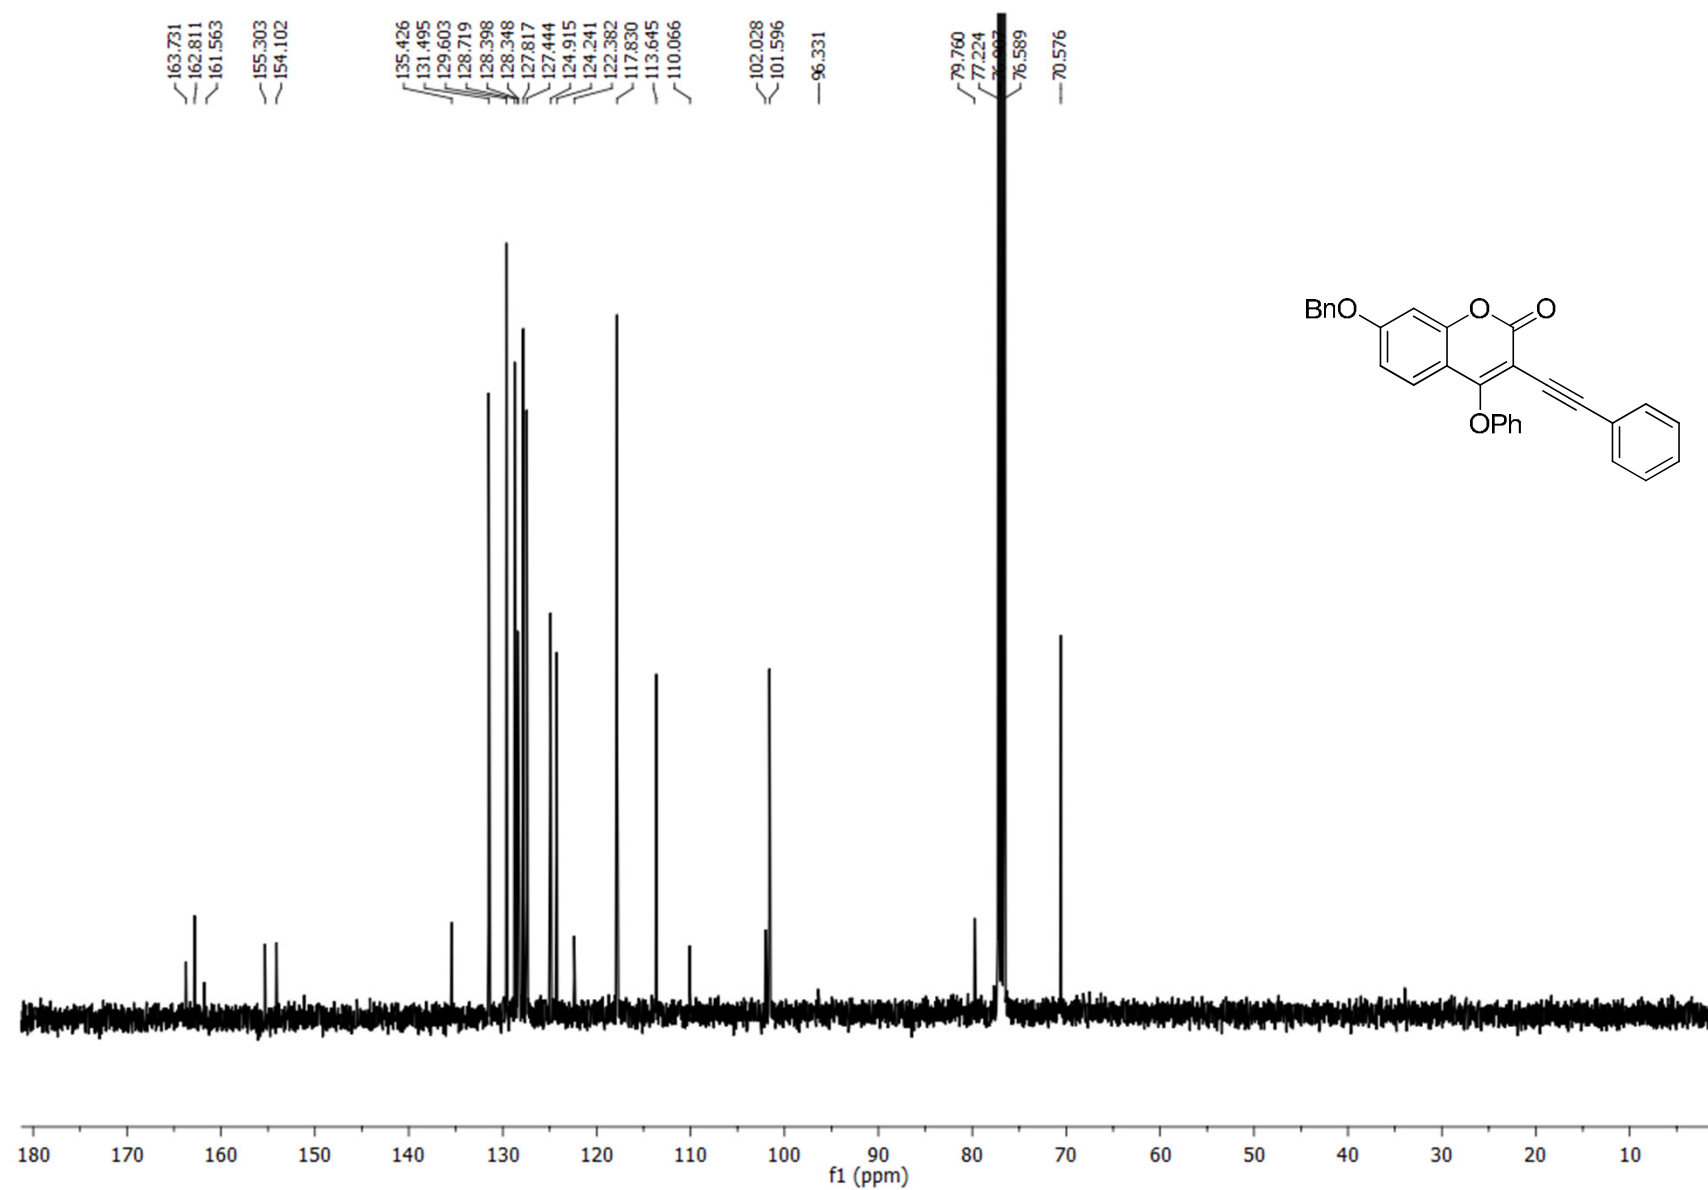

**<sup>1</sup>H NMR of 4-(4-chlorophenoxy)-3-(2-phenylethynyl)-2H-chromen-2-one (5f)**

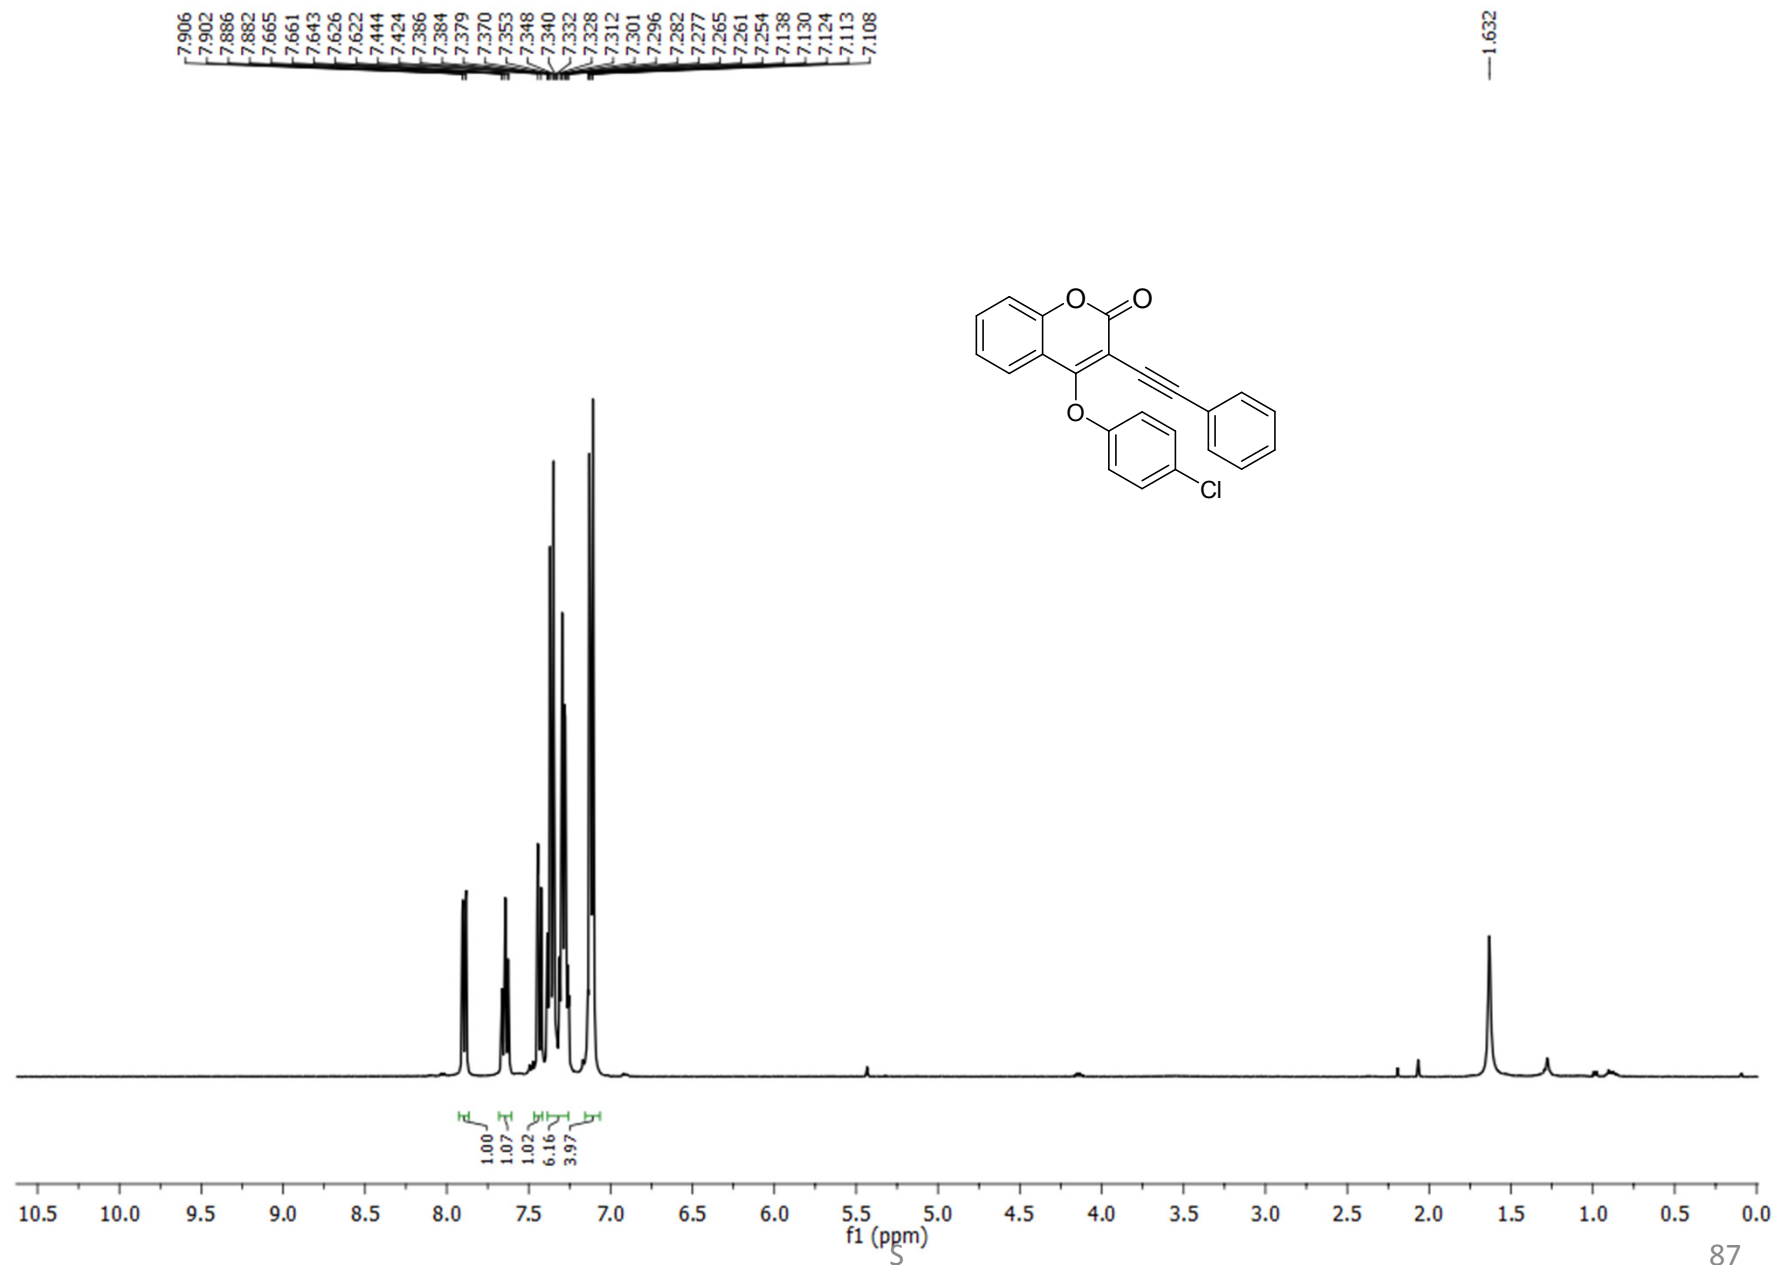

**$^{13}\text{C}$  NMR of 4-(4-chlorophenoxy)-3-(2-phenylethynyl)-2H-chromen-2-one (5f)**

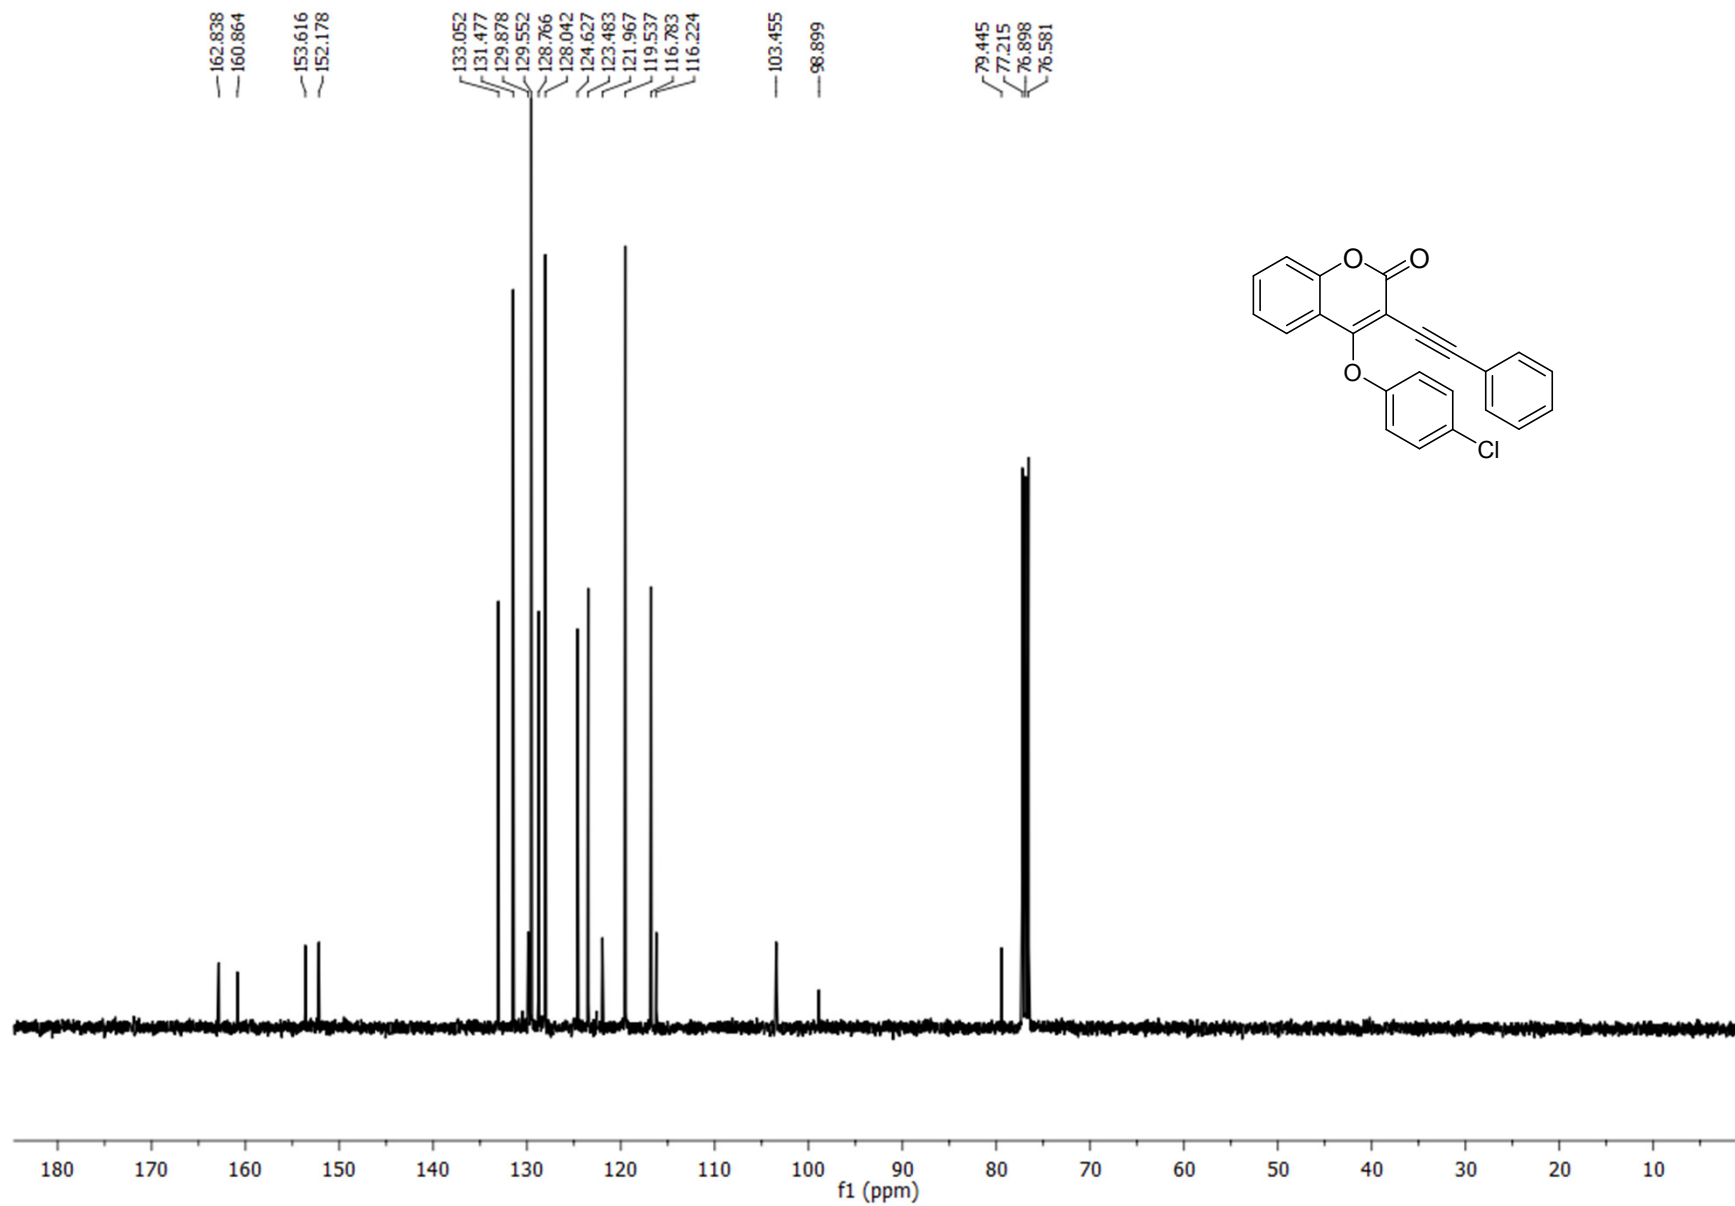

**<sup>1</sup>H NMR of 8-phenyl-6H-benzo[6,7]oxepino[3,2-c]chromen-6-one (6a)**

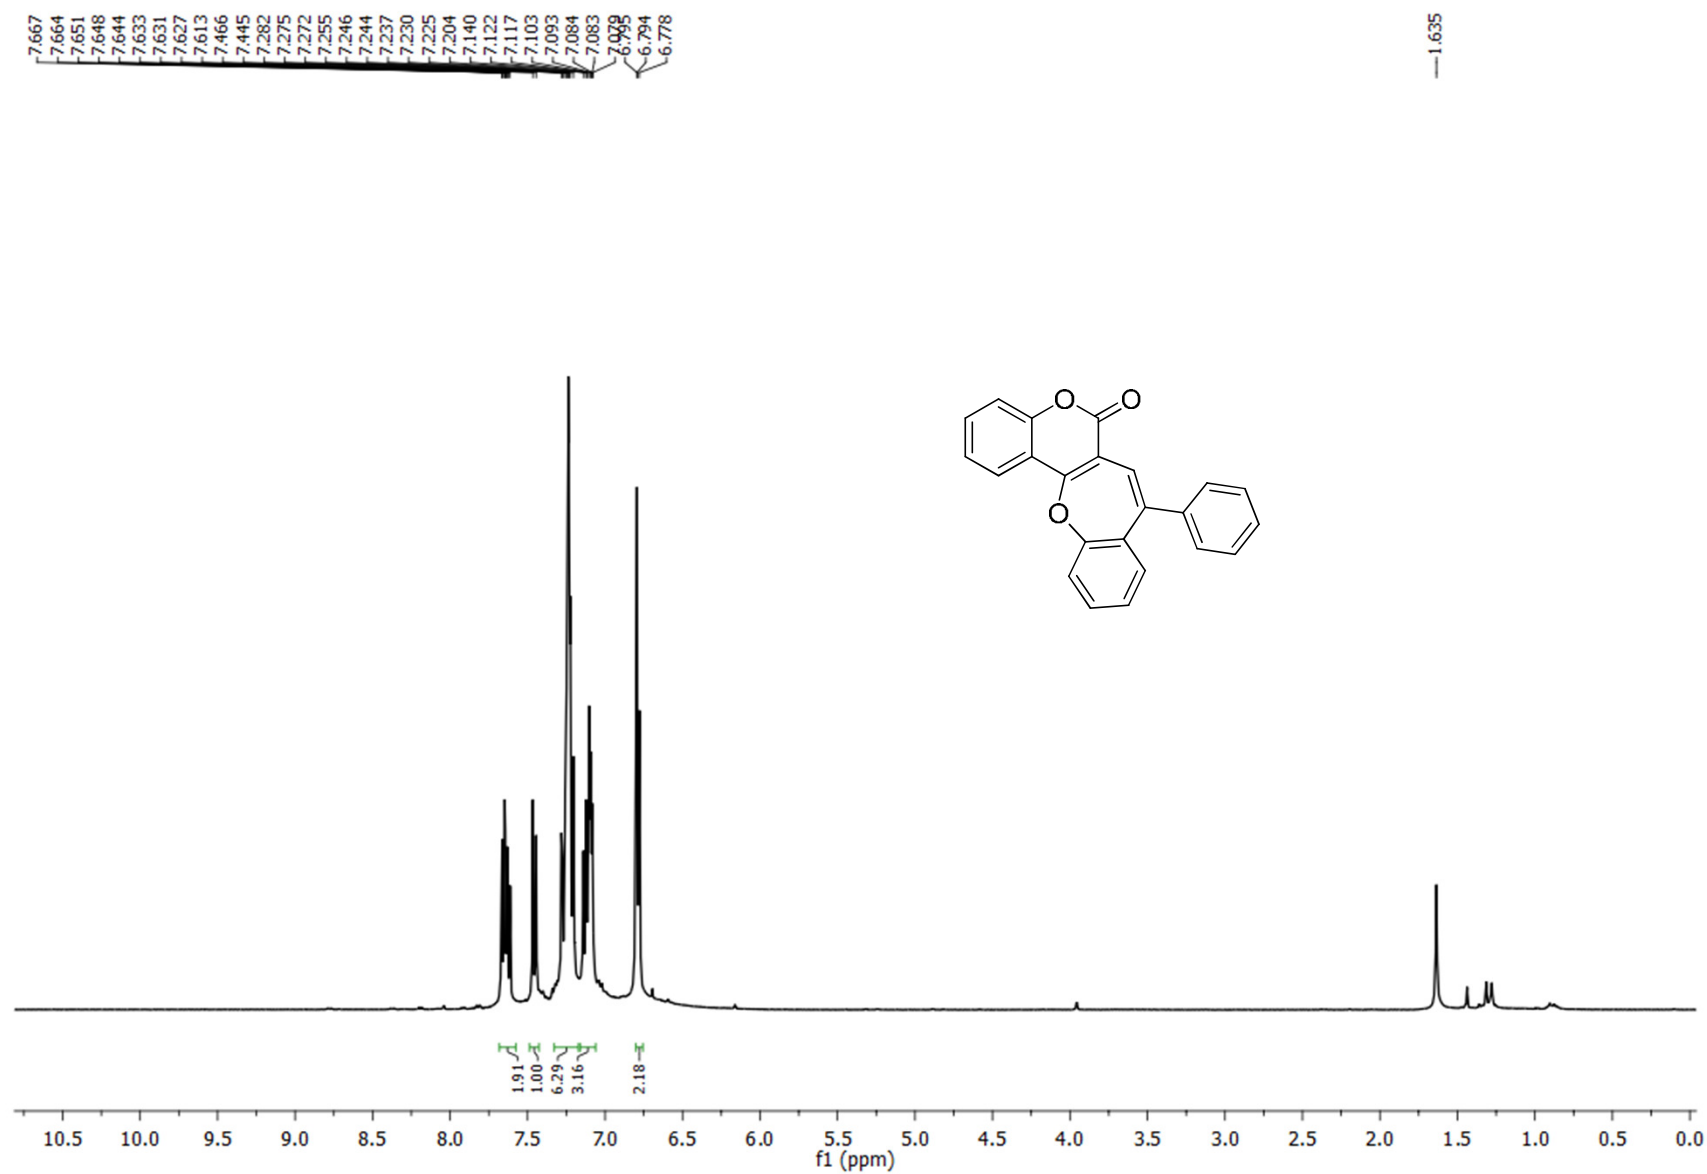

<sup>13</sup>C NMR of 8-phenyl-6H-benzo[6,7]oxepino[3,2-c]chromen-6-one (6a)

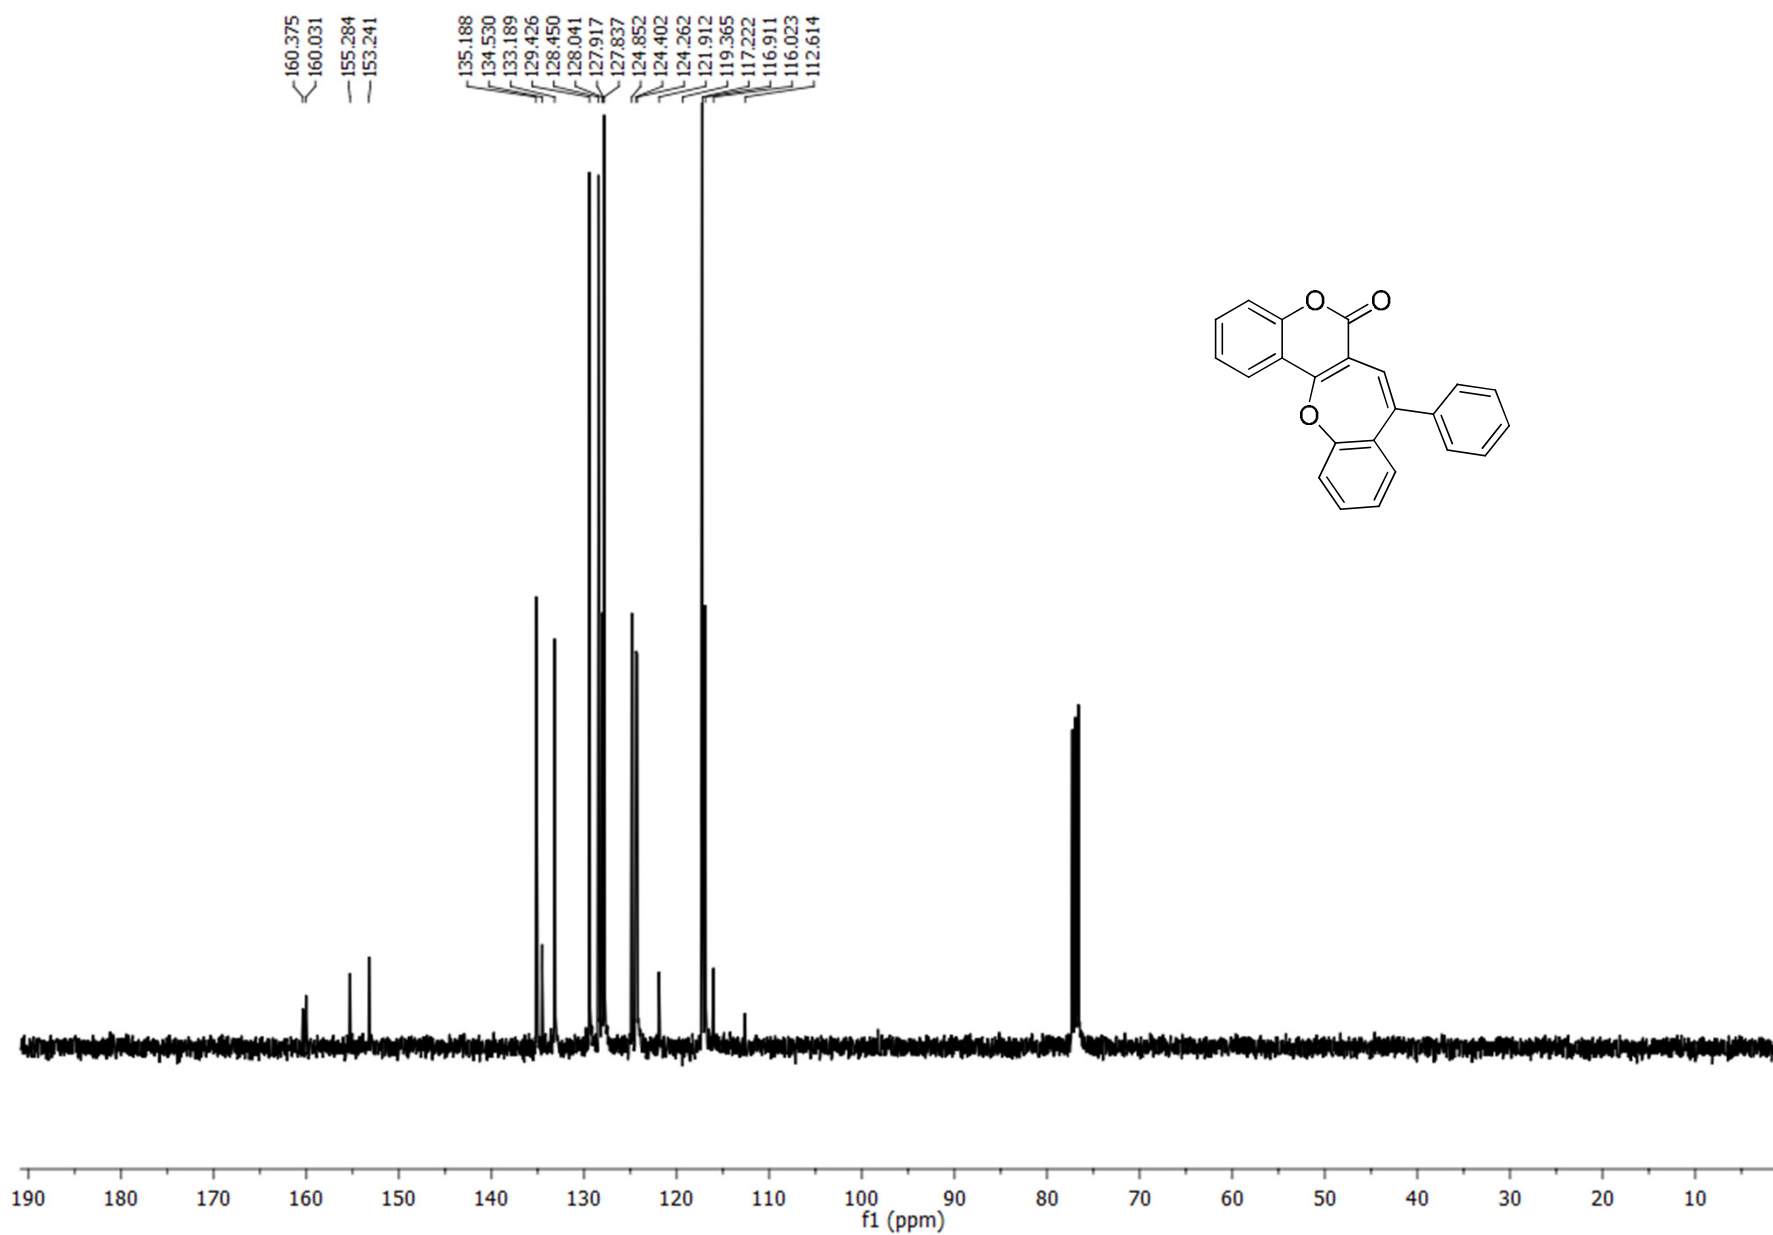

**<sup>1</sup>H NMR of 4-methyl-8-phenyl-6H-benzo[6,7]oxepino[3,2-c]chromen-6-one (6b)**

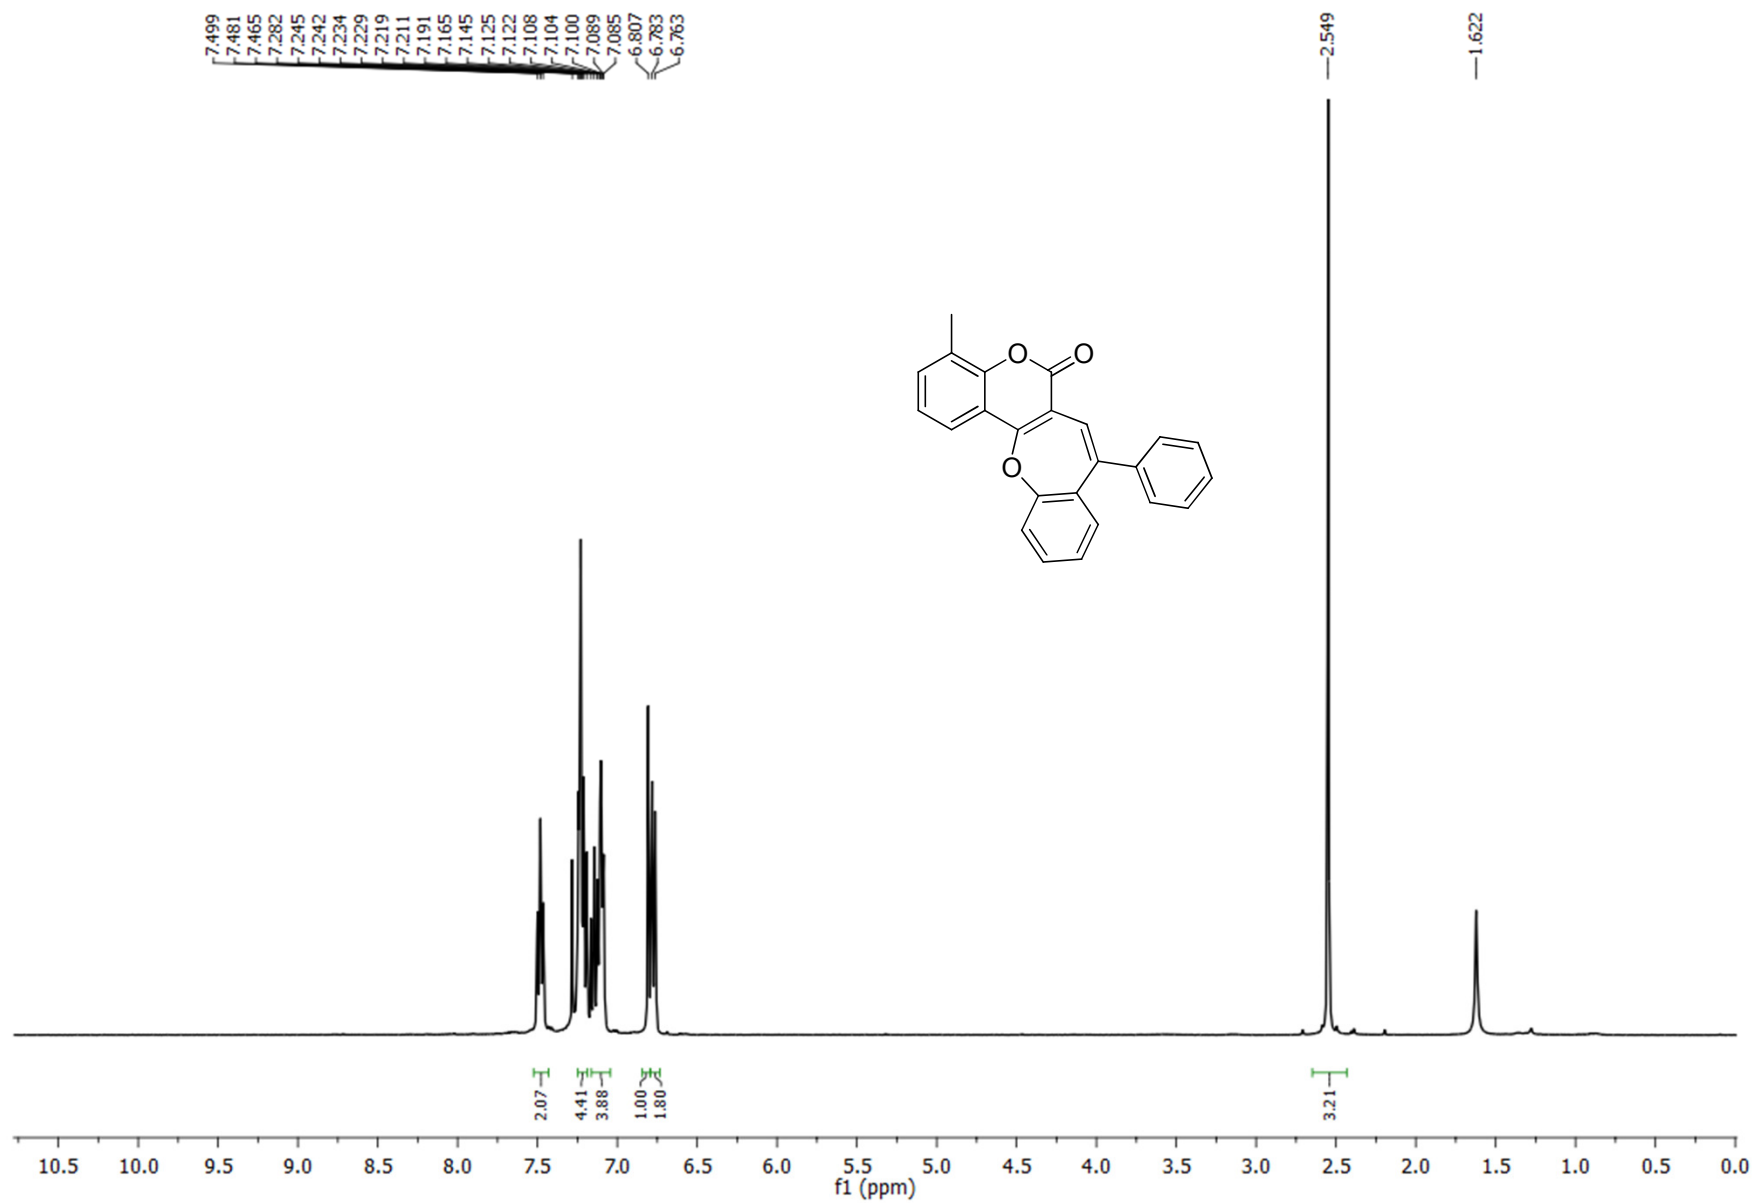

**<sup>13</sup>C NMR of 4-methyl-8-phenyl-6H-benzo[6,7]oxepino[3,2-c]chromen-6-one (6b)**

12.5.2018

13C of NP-IM-676-OMe 12.5.2018

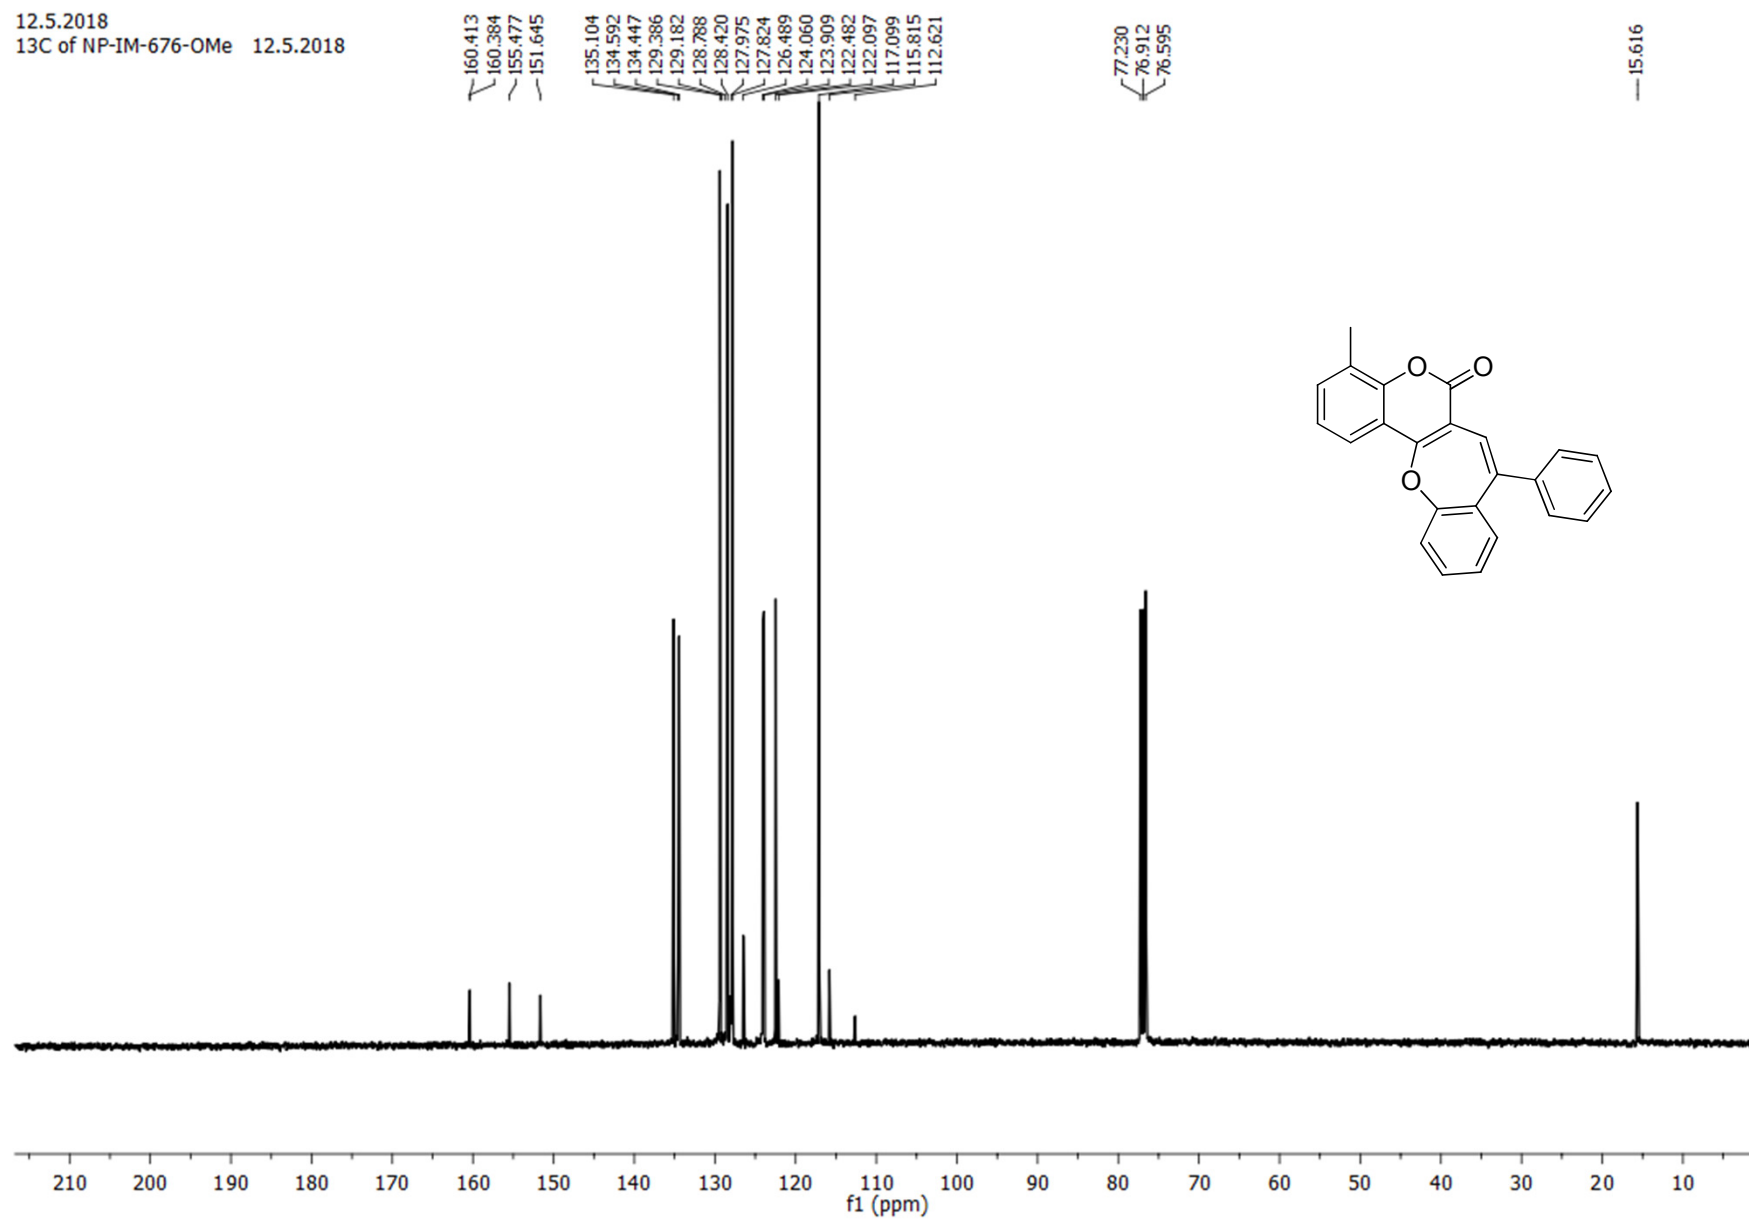

S



**$^1\text{H}$  NMR of 3-methyl-8-phenyl-6H-benzo[6,7]oxepino[3,2-c]chromen-6-one (6c)**

15.5.2018

1H of NP-IM-676-M-Me

15.5.2018

7.512  
7.491  
7.282  
7.251  
7.234  
7.227  
7.220  
7.215  
7.194  
7.126  
7.107  
7.100  
7.090  
7.082  
7.076  
7.067  
7.046  
6.794  
6.781  
6.761

2.487

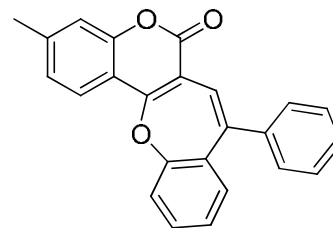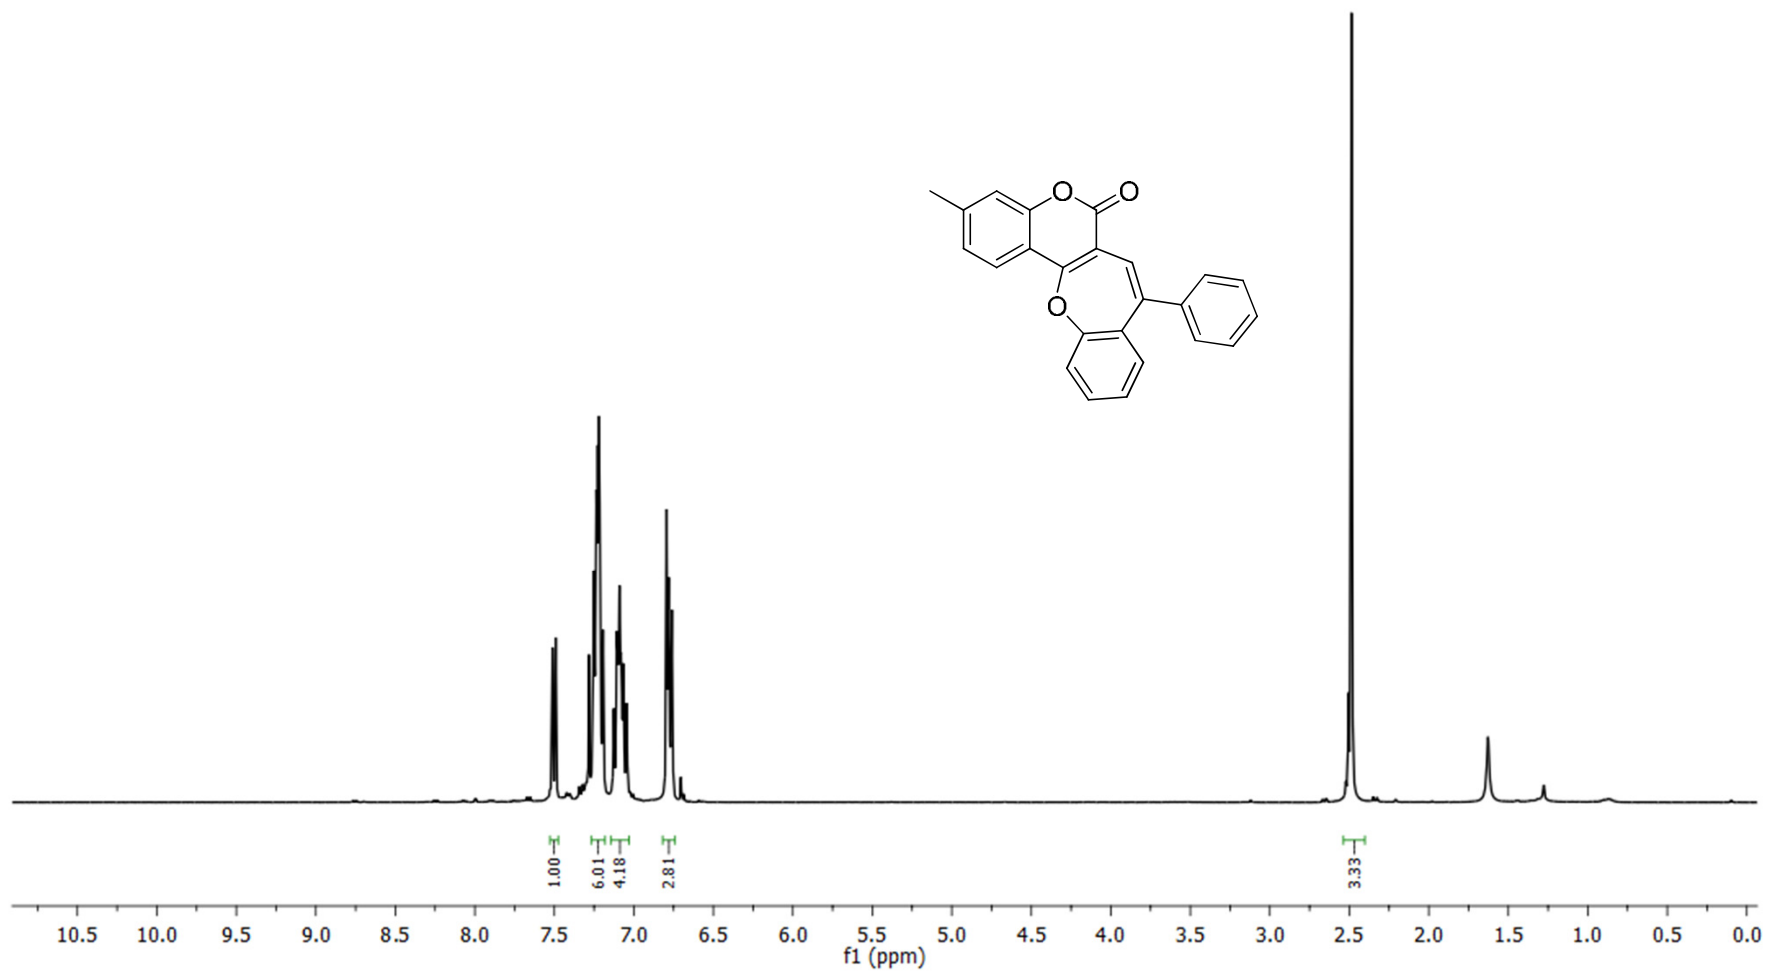

**$^{13}\text{C}$  NMR of 3-methyl-8-phenyl-6H-benzo[6,7]oxepino[3,2-c]chromen-6-one (6c)**

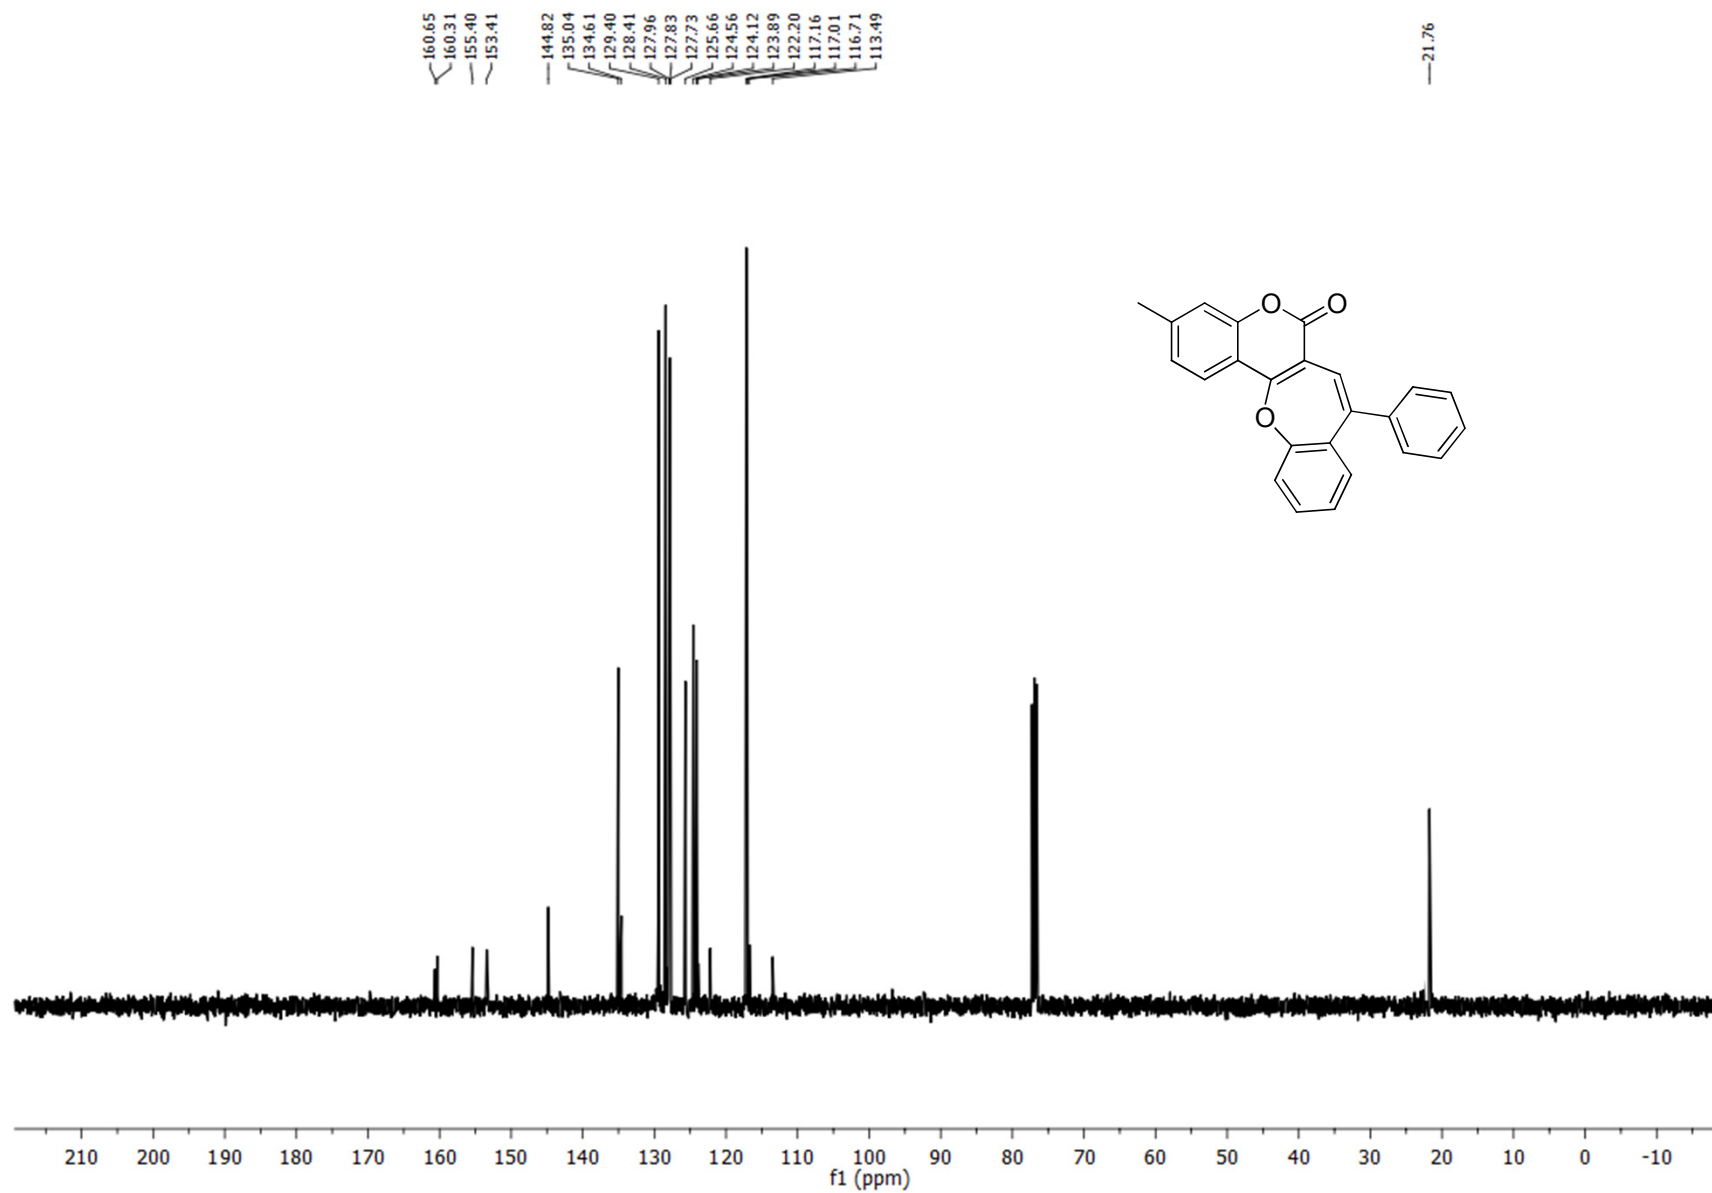

**<sup>1</sup>H NMR of 2-methyl-8-phenyl-6H-benzo[6,7]oxepino[3,2-c]chromen-6-one (6d)**

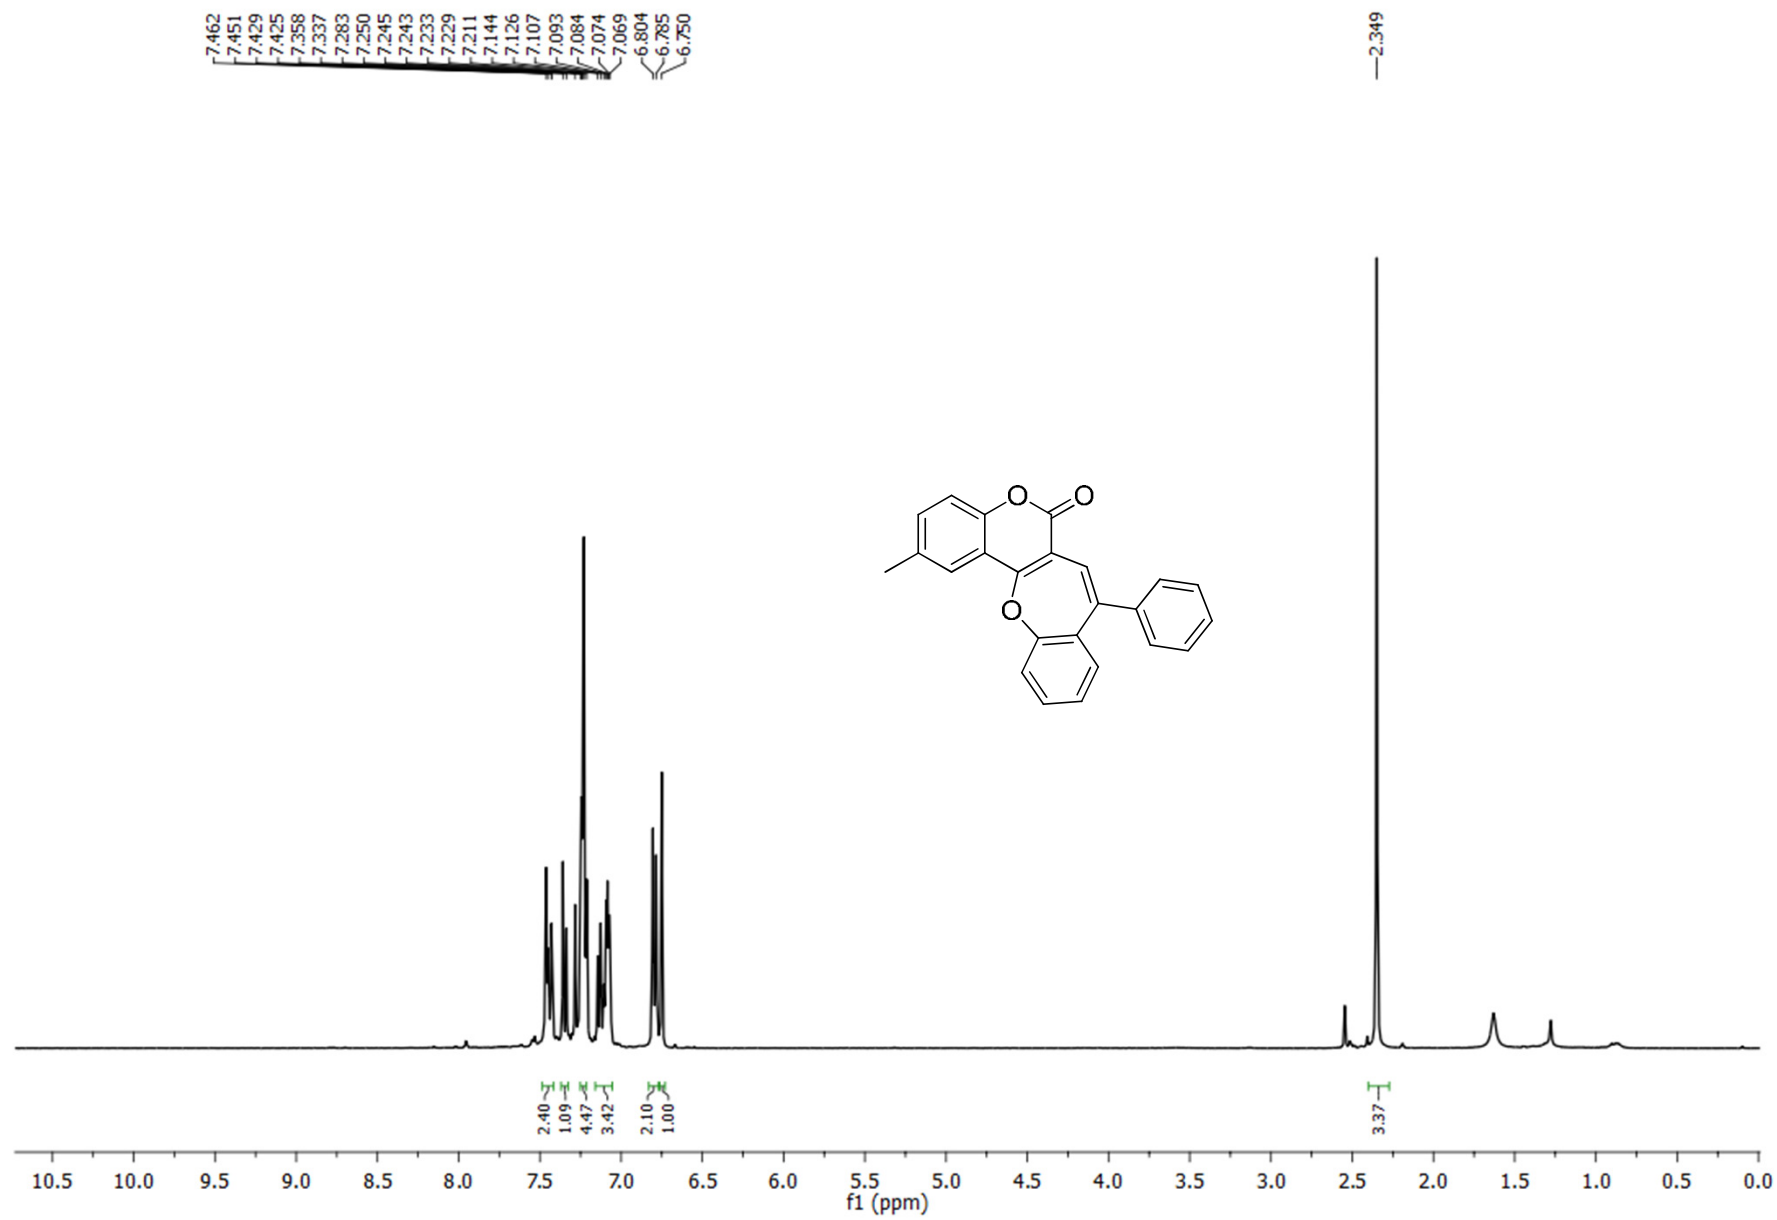

**<sup>13</sup>C NMR of 2-methyl-8-phenyl-6H-benzo[6,7]oxepino[3,2-c]chromen-6-one (6d)**

11.5.2018

<sup>13</sup>C of NP-IM-676P-Me 11.5.2018

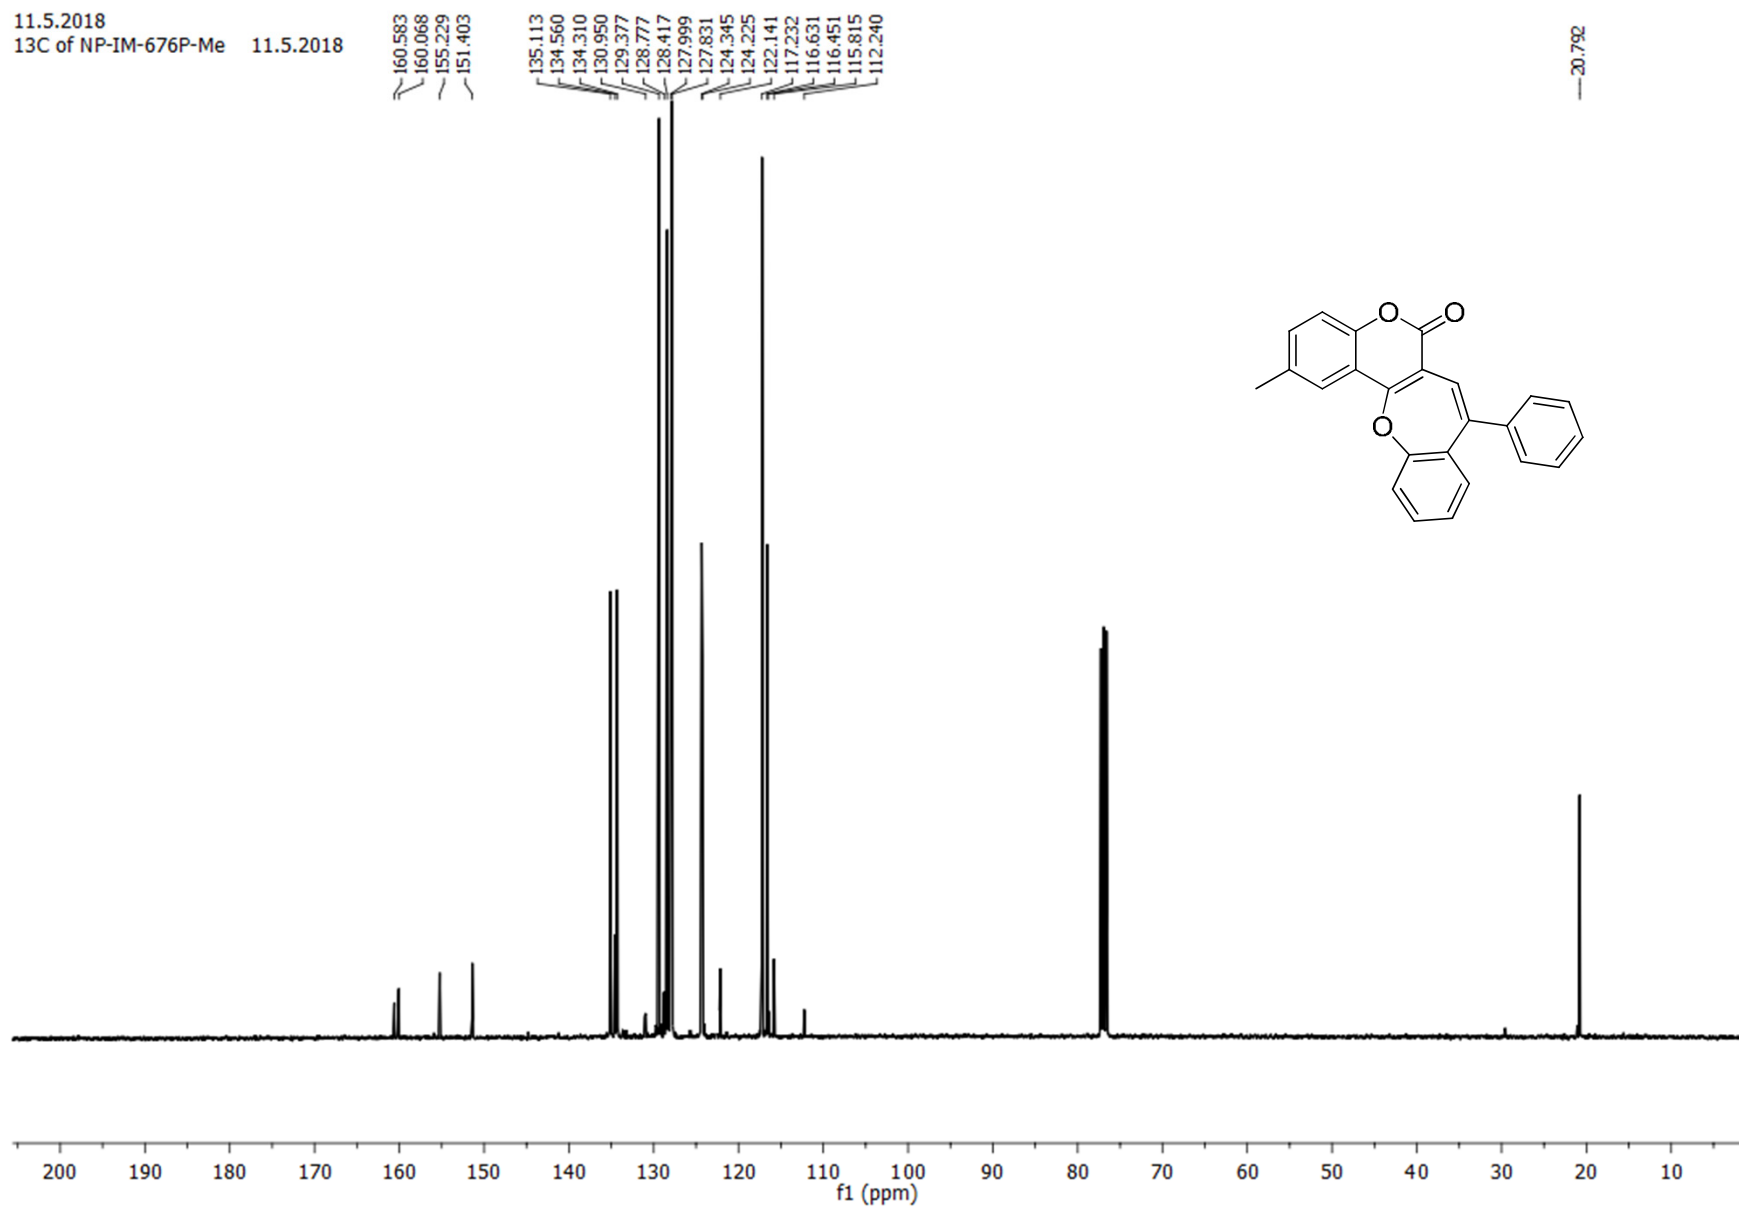

**<sup>1</sup>H NMR of 3-(benzyloxy)-8-phenyl-6H-benzo[6,7]oxepino[3,2-c]chromen-6-one (6e)**

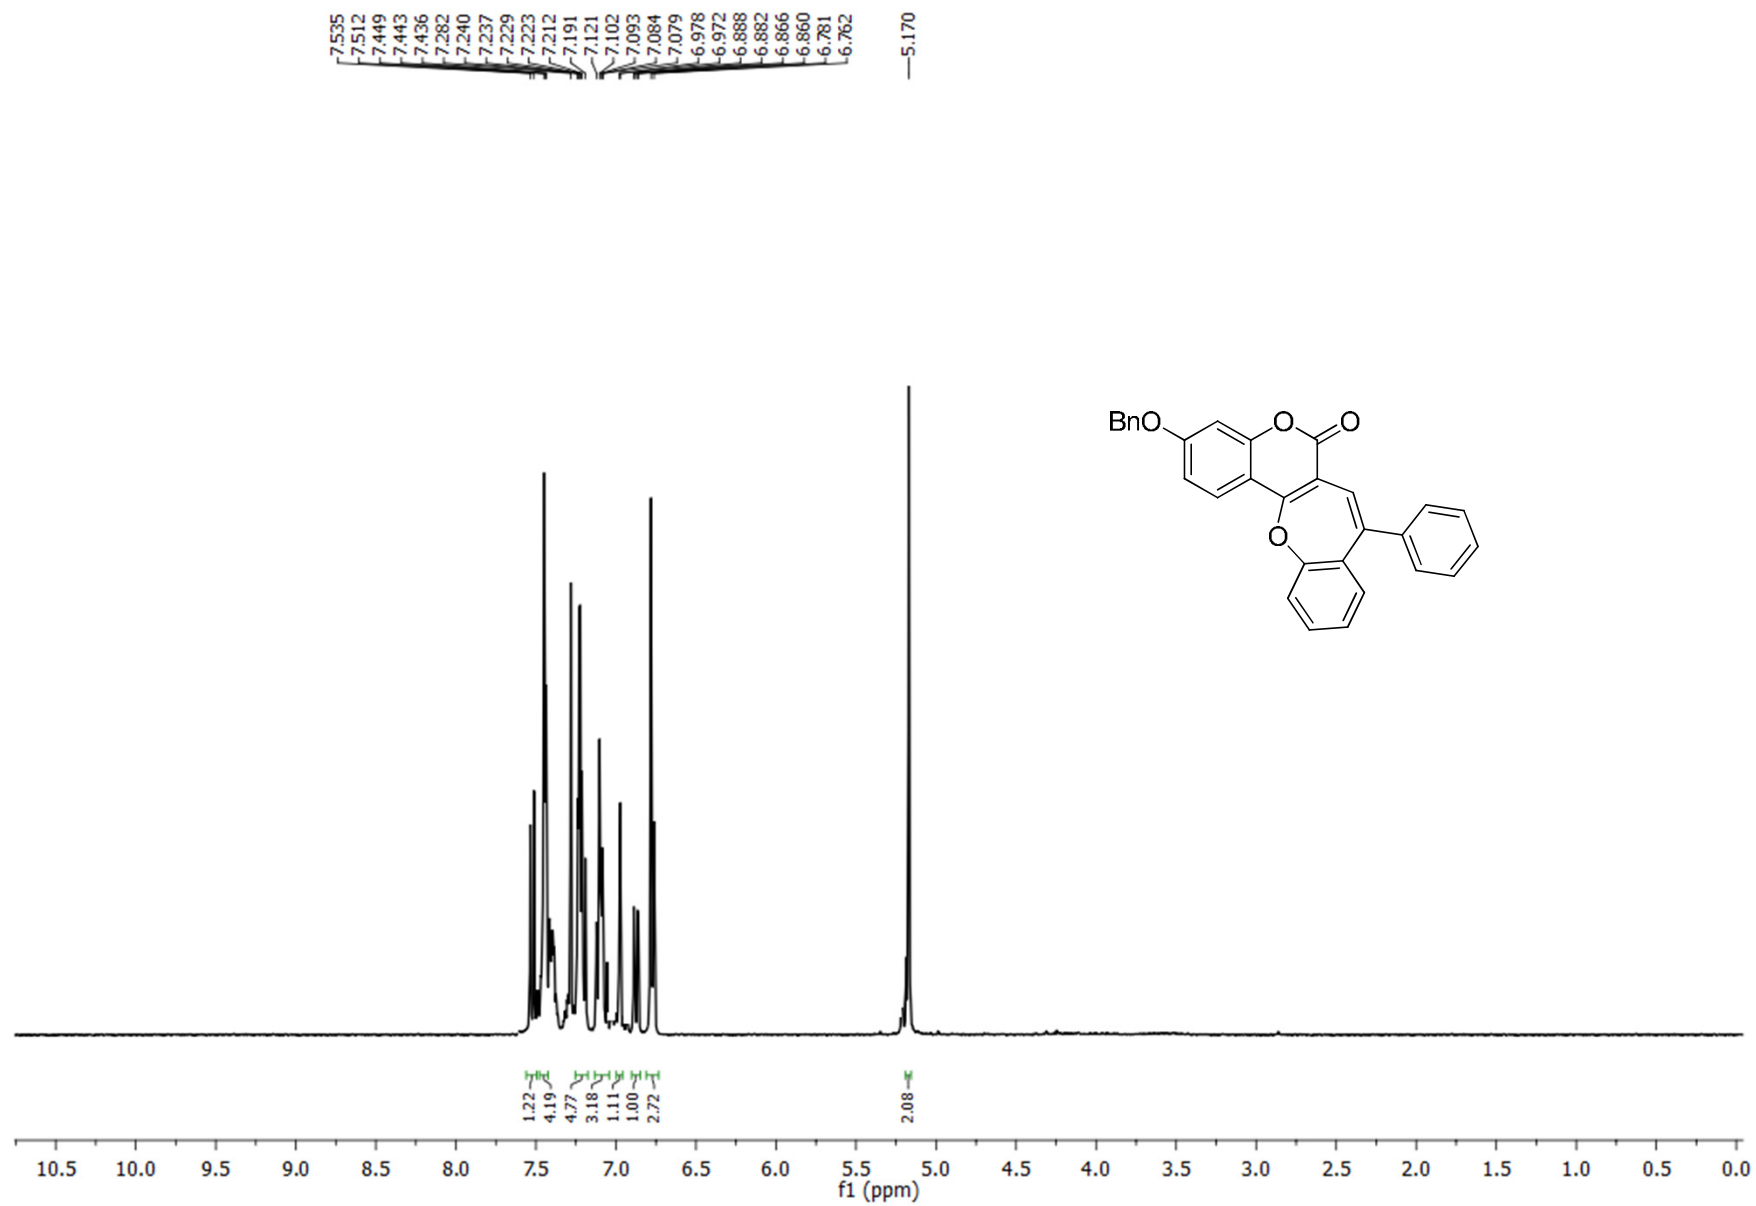

**<sup>13</sup>C NMR of 3-(benzyloxy)-8-phenyl-6H-benzo[6,7]oxepino[3,2-c]chromen-6-one (6e)**

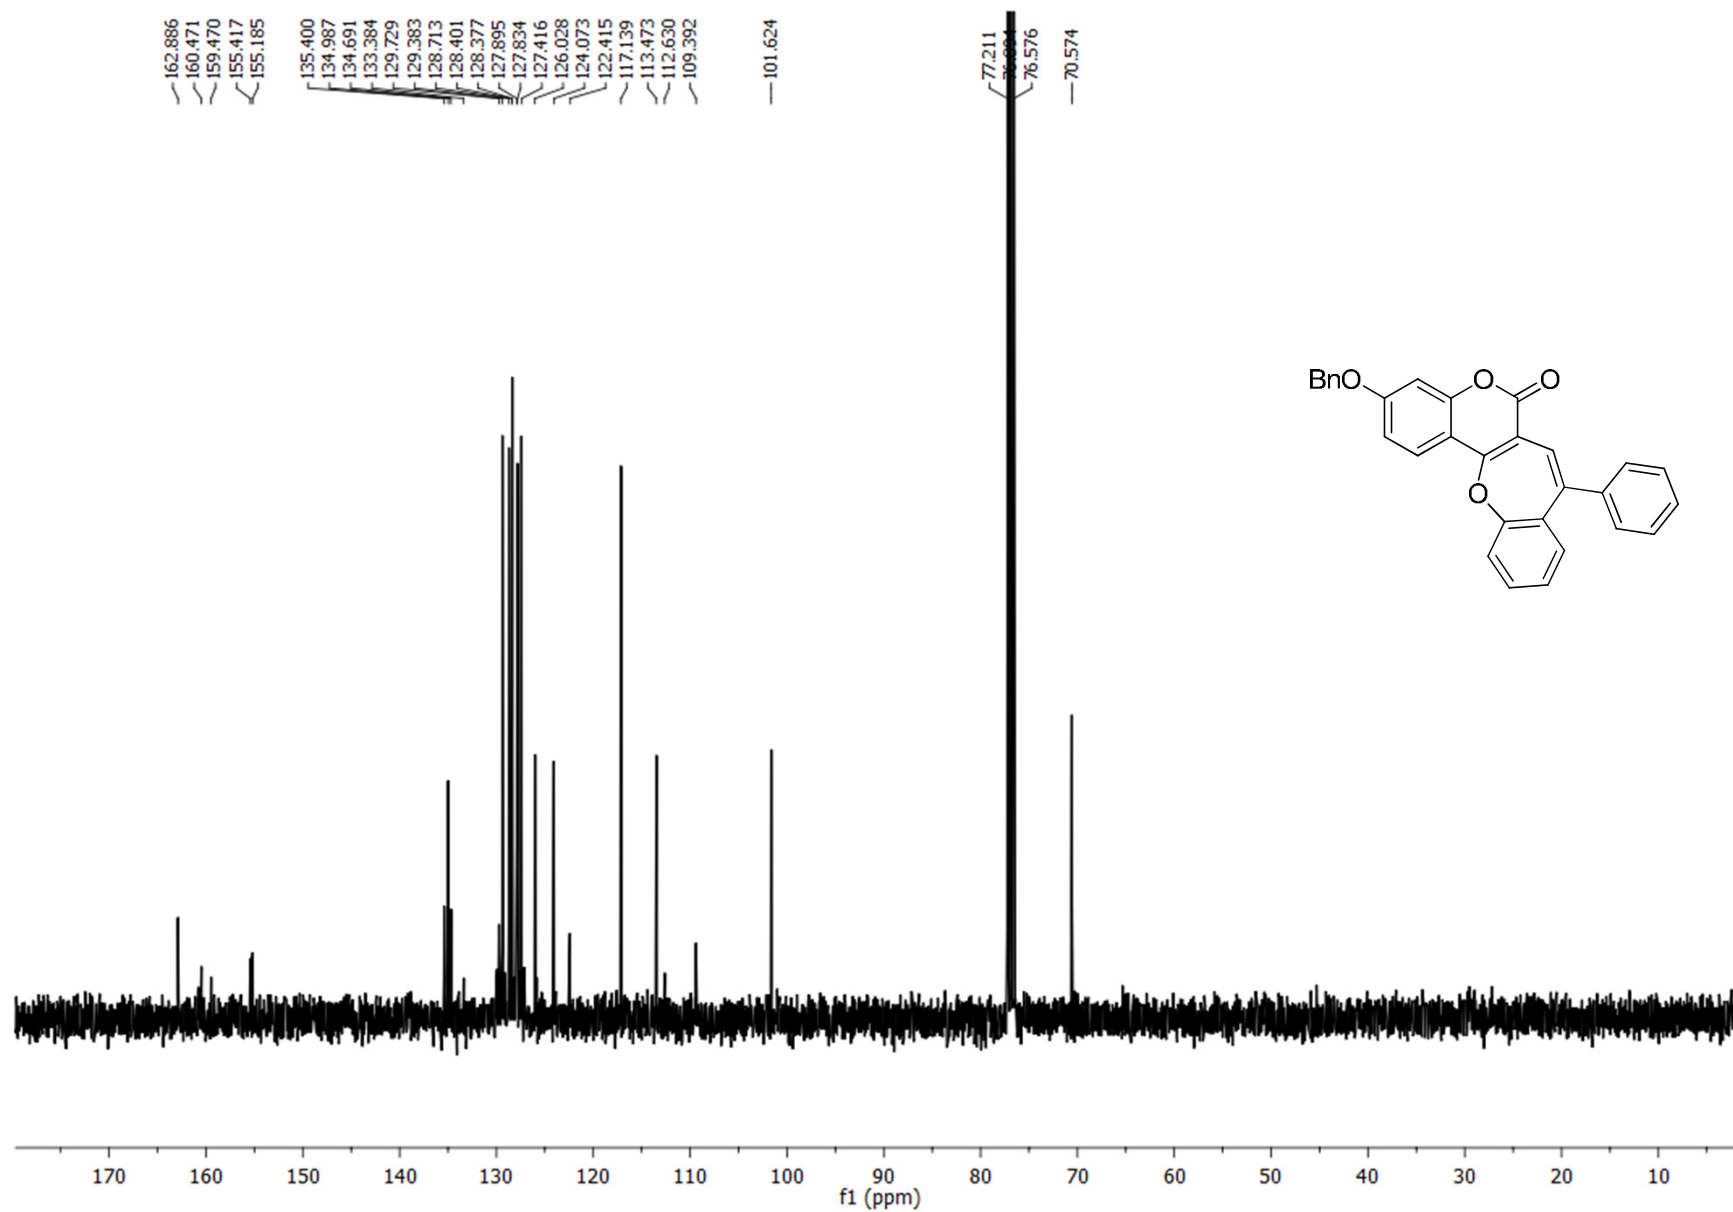

**<sup>1</sup>H NMR of 10-chloro-8-phenyl-6H-benzo[6,7]oxepino[3,2-c]chromen-6-one (6f)**

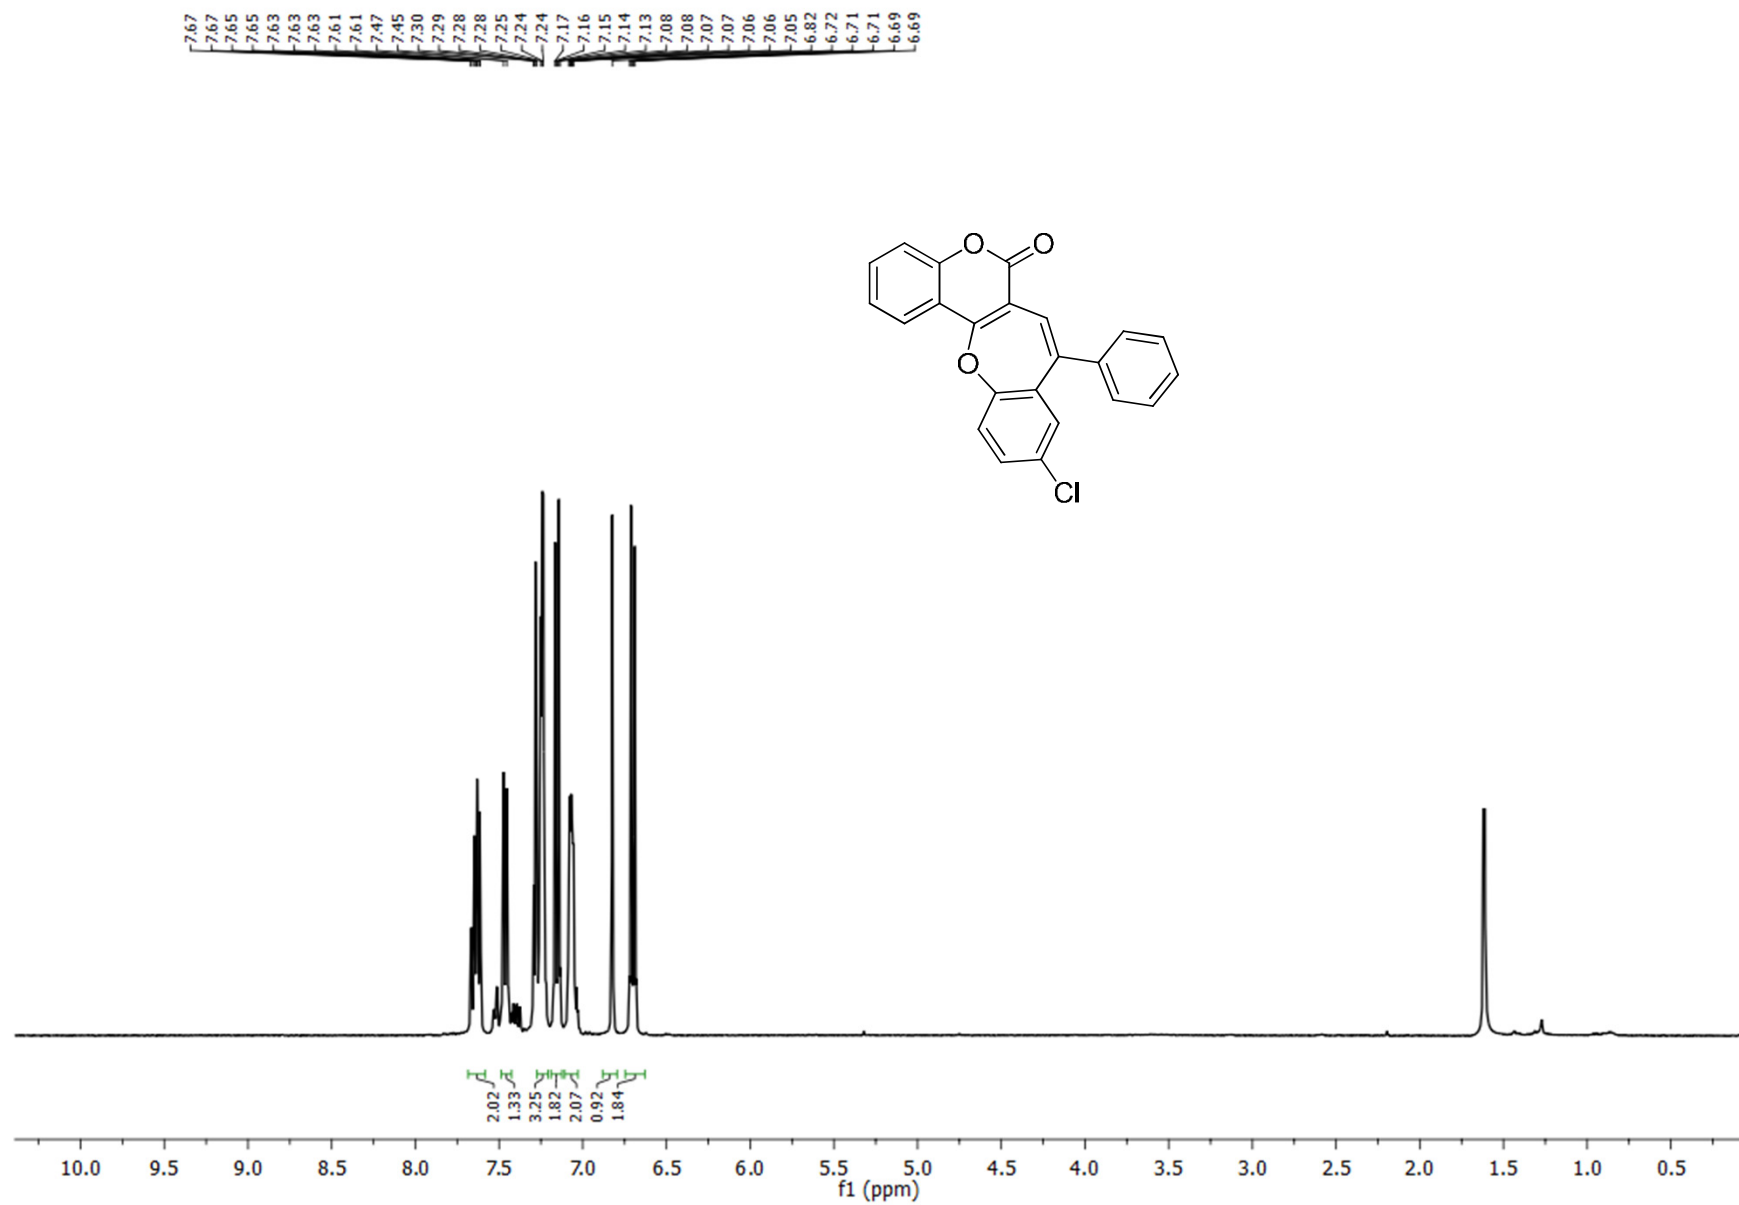

**$^{13}\text{C}$  NMR of 10-chloro-8-phenyl-6H-benzo[6,7]oxepino[3,2-c]chromen-6-one (6f)**

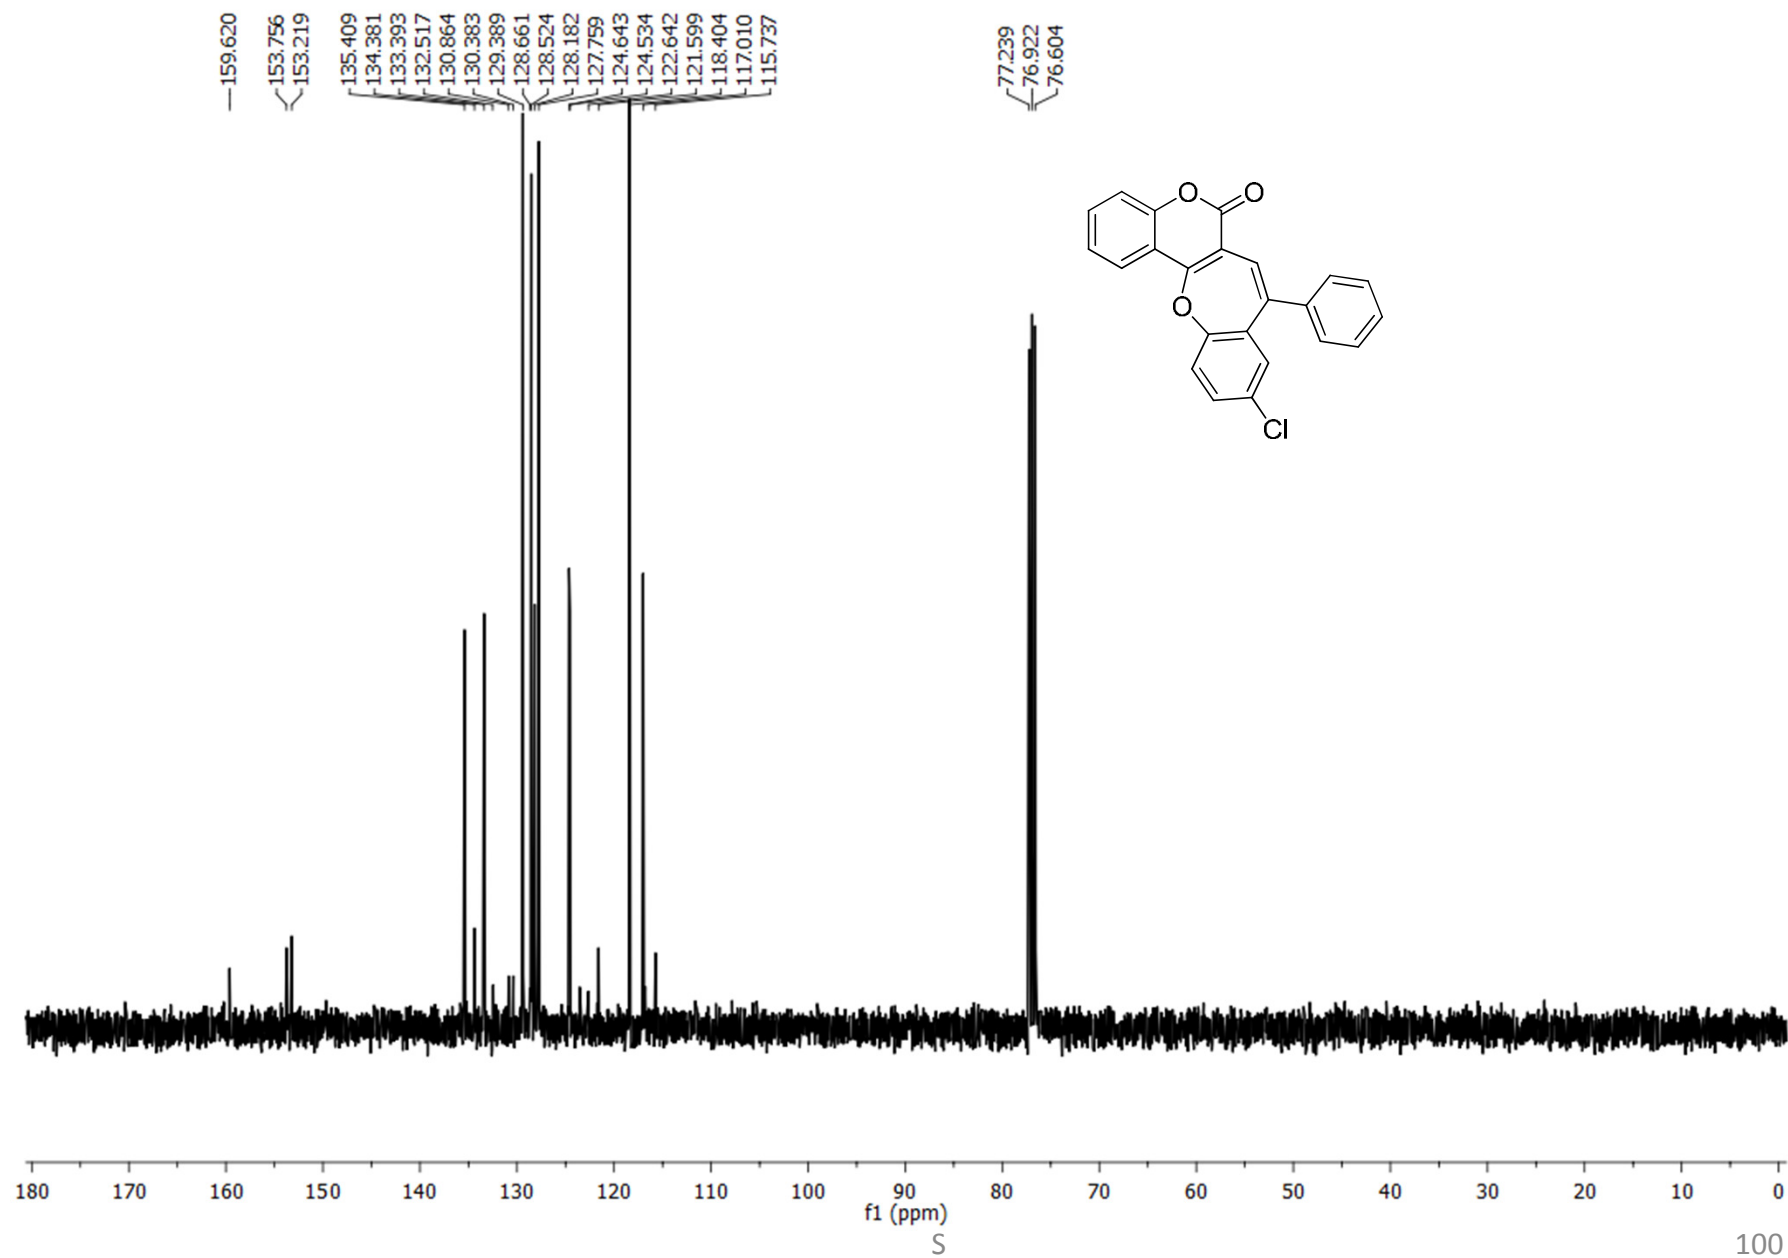

Supplement: c8ob01496e1.pdf [file c8ob01496e1.pdf]
